# Supplementary material
Source: publisher figshare collection journal article supplement (https://tandf.figshare.com/articles/dataset/_/28472516)
Supplement: Supplementary file 1 [file 1]

**Table S6: NetworKIN kinase groups:** The left column lists NetworKIN kinase groups as shown in Figure 5 A. The right column highlights members of respective groups that are the most likely kinases phosphorylating identified motifs.

| Group               | Members                                         |
|---------------------|-------------------------------------------------|
| ACTR2/ACTR2B/TGFbR2 | TGFBR2;ACVR2B                                   |
| AMPK                | PRKAA1;PRKAA2                                   |
| ATM/ATR             | ATM;ATR                                         |
| AURKA               | AURKA                                           |
| AURKC/AURKB         | AURKB                                           |
| CAMK2A/CAMK2D       | CAMK2A                                          |
| CAMK2B/CAMK2G       | CAMK2G                                          |
| CDK2/CDK3           | CDK2;CDK3                                       |
| CSNK2               | CSNK2A2;CSNK2A1                                 |
| CLK                 | CLK1;CLK2;CLK3;CLK4                             |
| DMPK                | DMPK;CDC42BPA                                   |
| DNAPK               | PRKDC                                           |
| GSK3                | GSK3B;GSK3A                                     |
| JNK                 | MAPK8;MAPK10;MAPK9                              |
| NEK1/5/3/4/11/2     | NEK2                                            |
| MAPK                | MAPK14;MAPK11;MAPK13;MAPK12                     |
| RPS6KB              | RPS6KB1;RPS6KB2                                 |
| PAKA                | PAK1;PAK2;PAK3                                  |
| PAKB                | PAK4;PAK7;PAK6                                  |
| PIM2                | PIM2                                            |
| PIM3/PIM1           | PIM3;PIM1                                       |
| PKA                 | PRKACB;PRKACA;PRKACG                            |
| PKB                 | AKT1;AKT2;AKT3                                  |
| PKC                 | PRKCD;PRKCI;PRKCZ;PRKCA;PRKCQ;PRKCG;PRKCB;PRKCE |
| PKD                 | PRKD1                                           |
| RCK                 | MOK;ICK                                         |
| SGK                 | SGK1                                            |
| TLK                 | TLK1                                            |
