# Supplementary material
Source: publisher figshare collection journal article supplement (https://tandf.figshare.com/articles/dataset/_/28472516)
Supplement: Supplementary file 1 [file 1]

## Sheet: Supplemental Table S1
UniProt Accession Key	Protein Names	Gene Names	Position	Ratio-AA 2 mins	Average variability (%) AA 2 mins	Ratio-AA 7 mins	Average variability (%) AA 7 mins	Ratio-AA 15 mins	Average variability (%) AA 15 mins	Ratio-AA 30 mins	Average variability (%) AA 30 mins	Ratio-Rapa 2 mins	Average variability (%) Rapa 2 mins	Ratio-Rapa 7 mins	Average variability (%) Rapa 7 mins	Ratio-Rapa 15 mins	Average variability (%) Rapa 15 mins	Ratio-Rapa 30 mins	Average variability (%) Rapa 30 mins	Localization Prob	Sequence Window	GOCC	GOMF	GOBP	Cluster AA Starvation	Cluster Rapamycin	Ratio M L Normalized Rep1_AA_starvation_0_15	Ratio M L Variability(%) Rep1_AA_starvation_0_15	Ratio M L Count Rep1_AA_starvation_0_15	Ratio H L Normalized Rep1_AA_starvation_0_15	Ratio H L Variability(%) Rep1_AA_starvation_0_15	Ratio H L Count Rep1_AA_starvation_0_15	Ratio H M Normalized Rep1_AA_starvation_0_15	Ratio H M Variability(%) Rep1_AA_starvation_0_15	Ratio H M Count Rep1_AA_starvation_0_15	Ratio M L Normalized Rep1_AA_starvation_2_30	Ratio M L Variability(%) Rep1_AA_starvation_2_30	Ratio M L Count Rep1_AA_starvation_2_30	Ratio H L Normalized Rep1_AA_starvation_2_30	Ratio H L Variability(%) Rep1_AA_starvation_2_30	Ratio H L Count Rep1_AA_starvation_2_30	Ratio H M Normalized Rep1_AA_starvation_2_30	Ratio H M Variability(%) Rep1_AA_starvation_2_30	Ratio H M Count Rep1_AA_starvation_2_30	Ratio M L Normalized Rep1_Rapamycin_0_15	Ratio M L Variability(%) Rep1_Rapamycin_0_15	Ratio M L Count Rep1_Rapamycin_0_15	Ratio H L Normalized Rep1_Rapamycin_0_15	Ratio H L Variability(%) Rep1_Rapamycin_0_15
A0AVK6	Transcription factor E2F8;Putative uncharacterized protein E2F8	E2F8;E2F8	S71	1.19765		1.2052		2.05619		0.861176										0.99999	MIISAVSPEIRNR	GO:0005667	GO:0003677;GO:0003700	GO:0007049;GO:0006351	3	n/a
A0FGR8	Chr2Syt;Extended synaptotagmin-2;Putative uncharacterized protein ESYT2	ESYT2;FAM62B;KIAA1228;ESYT2	S709	0.86875	7.28	0.67574	18.96	0.847716	7.94	0.563925	27.42	0.904992	2.02	0.75641	21.9	0.742492	24.61	0.703552	5.32	0.824542	RKTSIKSHMSGSP	GO:0016021;GO:0005886			0	0	0.67574	18.959	2	0.8067	27.719	2	1.2545	7.9377	2	0.77783	7.2809	3	0.68097	30.967	3	0.83453	27.417	3	0.75641	21.901	4	0.75433	10.882
A0FGR8	Chr2Syt;Extended synaptotagmin-2;Putative uncharacterized protein ESYT2	ESYT2;FAM62B;KIAA1228;ESYT2	S714	0.97313	12.56	0.85615	18.67	1.03286	35.88	0.873444	37.43	0.903508	11.81	0.8048	21.32	0.895662	14.84	0.76691	5.27	0.803436	KSHMSGSPGPGGS	GO:0016021;GO:0005886			0	0	0.85615	18.672	5	0.93757	20.5	5	1.2064	35.877	5	0.87979	12.556	2	1.0378	48.155	2	1.0202	37.427	2	0.8048	21.316	7	0.87424	16.616
A0FGR8	Chr2Syt;Extended synaptotagmin-2;Putative uncharacterized protein ESYT2	ESYT2;FAM62B;KIAA1228;ESYT2	S759	1.07521		0.91841	14.94	1.09272	25.05	1.28614		1.186	13.09	1.1576	26.78	1.3236	55.35	1.15818	14.61	0.486805	DIGRSSSSIIASP	GO:0016021;GO:0005886			0	0	0.91841	14.937	13	1.3278	32.081	13	1.1898	25.048	13	0.85417		1	1.4318		1	1.4004		1	1.1576	26.78	5	1.0004	12.964
A0FGR8	Chr2Syt;Extended synaptotagmin-2;Putative uncharacterized protein ESYT2	ESYT2;FAM62B;KIAA1228;ESYT2	S760	1.08751	12.08	1.1545	11.17	1.73279	15.96	1.58086	3.97	0.90628	10.77	0.9322	16.68	1.11827	13.65	1.31944	3.39	0.486805	IGRSSSSIIASPG	GO:0016021;GO:0005886			0	0	1.1545	11.168	4	1.5463	15.343	4	1.5009	15.961	4	1.0616	12.076	2	1.27	5.638	2	1.3693	3.9694	2	0.9322	16.676	2	1.0875	9.055
A0FGR8	Chr2Syt;Extended synaptotagmin-2;Putative uncharacterized protein ESYT2	ESYT2;FAM62B;KIAA1228;ESYT2	S776	0.730947	8.14	0.82764		0.726411		0.737026	16.02	1.10426	29.86	0.87751	33.16	0.738609	4.23	0.666214	11.62	0.964492	VKEPTPSIASDIS	GO:0016021;GO:0005886			0	0	0.82764		1	0.86313		1	0.87769		1	0.90957	8.1402	2	0.87393	4.4382	2	0.99386	16.016	2	0.87751	33.16	4	0.8685	20.083
A0FGR8	Chr2Syt;Extended synaptotagmin-2;Putative uncharacterized protein ESYT2	ESYT2;FAM62B;KIAA1228;ESYT2	S779	0.885975	23.67	0.953145	27.52	1.34387	44.08	0.795419	37.47	1.29487	11.04	1.092	21.7	0.93592	13.42	1.18431	12.82	0.999603	PTPSIASDISIPI	GO:0016021;GO:0005886			0	0	0.92436	27.523	10	0.93001	12.728	10	0.90257	44.075	10	0.86233	23.665	16	0.86612	41.007	16	0.9758	37.474	16	1.092	21.698	6	0.90943	22.896
A0FGR8	Chr2Syt;Extended synaptotagmin-2;Putative uncharacterized protein ESYT2	ESYT2;FAM62B;KIAA1228;ESYT2	S782	0.877157	22.83	0.953145	25.07	1.33731	40.2	0.792368	34.68	1.29641	20.86	1.0881	21.33	0.979801	12.15	1.18091	18.2	0.937609	SIASDISIPIATQ	GO:0016021;GO:0005886			0	0	0.92436	25.073	12	0.92537	11.637	12	0.88881	40.204	12	0.88396	22.827	19	0.87383	38.179	19	0.9694	34.683	19	1.0881	21.327	7	0.92268	21.731
A0JLT2	Lung cancer metastasis-related protein 1;Mediator complex subunit 19;Mediator of RNA polymerase II transcription subunit 19	LCMR1;MED19	S226	1.08313	34.72	0.99779	13.24	0.50128	49.16	0.894718	11.83			1.1239	5.23	1.04451	34.39			0.81751	KKKNRHSPDHPGM		GO:0001104		0	n/a	0.99779	13.237	3	0.97992	50.834	3	0.50239	49.162	3	0.92121	34.715	5	0.90611	33.333	5	0.8967	11.827	5	1.1239	5.2341	3	1.1501	34.946
A0JNW5	UHRF1-binding protein 1-like	KIAA0701;UHRF1BP1L	S935	0.949589	30.8	1.0624	10.97	0.829649	34.73	0.935305	34.21									0.974019	SDNRSMSVDISHI				0	n/a	1.0624	10.969	5	0.80971	31.298	5	0.78092	34.726	5	1.1188	30.804	4	1.0925	12.195	4	0.88037	34.21	4
A1L170	Uncharacterized protein C1orf226	C1orf226	S265	1.04023	12.24	1.1739		0.95188		1.38778	14.76			0.92895	11.97	1.10666	13.21			0.99997	TECRRASSPSIIE				0	n/a	1.1739		1	0.86502		1	0.81087		1	1.1285	12.236	11	1.2352	10.635	11	1.1822	14.758	11	0.92895	11.969	12	1.1516	15.483
A1L170	Uncharacterized protein C1orf226	C1orf226	S266	0.884369	12.24	0.99801	9.2	1.07585	20.67	1.17985	14.76			0.92895	11.97	1.10666	13.21			0.99977	ECRRASSPSIIER				0	n/a	0.99801	9.1984	13	1.0914	13.079	13	1.078	20.67	13	1.1285	12.236	11	1.2352	10.635	11	1.1822	14.758	11	0.92895	11.969	12	1.1516	15.483
A1L390	Pleckstrin homology domain-containing family G member 3	KIAA0599;PLEKHG3	S1037									1.26169		1.1683	7	1.03237	34.2	1.18629		0.999704	GRPSARSPISPTE	GO:0005622	GO:0005543;GO:0005089	GO:0035023	n/a	0										1.0496	6.113	7	1.2253	9.8053	7	1.1657	11.427	7	1.1683	6.9965	2	0.9691	39.967
A1L390	Pleckstrin homology domain-containing family G member 3	KIAA0599;PLEKHG3	S618	0.982908	45.97	1.10125	13.67	1.01766	8.4	1.17977	5.12	1.18578	14.25	1.3461	42.28	1.42592	80.66	1.39604	13.34	0.996691	SFSRRSSVAQEDS	GO:0005622	GO:0005543;GO:0005089	GO:0035023	0	0	1.0253	13.671	6	1.1695	12.413	6	1.1711	8.3988	6	1.1204	45.972	2	1.3406	6.5234	2	1.0713	5.1226	2	1.3461	42.276	13	1.3211	93.058
A1L390	Pleckstrin homology domain-containing family G member 3	KIAA0599;PLEKHG3	S640	0.866749	24.87	0.98818	13.02	1.50549	18.01	0.71564	40.2	1.09846	9.76	1.2986		1.26551		1.28568	13.41	0.840784	IVSRSSSVISIEG	GO:0005622	GO:0005543;GO:0005089	GO:0035023	0	0	0.98818	13.017	2	1.5091	20.424	2	1.5235	18.014	2	1.1401	24.873	3	0.93043	46.229	3	0.7242	40.203	3	1.2986		1	1.1921
A1L390	Pleckstrin homology domain-containing family G member 3	KIAA0599;PLEKHG3	S643	0.960407	14.35	0.94699	13	1.34605	26.79	1.18629	29.77	1.14196	27.25	1.3434	7.88	1.37403	12.24	1.34555	13.44	1	RSSSVISIEGSEK	GO:0005622	GO:0005543;GO:0005089	GO:0035023	0	0	0.94699	12.999	4	1.2384	28.644	4	1.4214	26.787	4	0.98603	14.35	11	1.1979	24.369	11	1.2527	29.767	11	1.3434	7.8844	8	1.3256	11.074
A1L390	Pleckstrin homology domain-containing family G member 3	KIAA0599;PLEKHG3	S647	1.01589	7.68	0.99503		0.921885		1.35633	20.97	1.09372	5.88	1.335	5.81	1.44113	14.15	1.46409	5.49	1	VISIEGSEKGIAR	GO:0005622	GO:0005543;GO:0005089	GO:0035023	0	0	0.99503		1	0.87152		1	0.92649		1	0.97947	7.6842	5	1.2431	13.274	5	1.3631	20.972	5	1.335	5.8134	5	1.3409	13.087
A1L390	Pleckstrin homology domain-containing family G member 3	KIAA0599;PLEKHG3	S76	1.22127	12.205	1.28415	8.8	1.59456	65.81	1.41236	22.575	1.2029	10.51	1.2242	17.79	1.58063	17.62	1.41891	7.605	1	NVKGPISPFNSRA	GO:0005622	GO:0005543;GO:0005089	GO:0035023	0	0	1.2919		1	1.006		1	0.88905		1	0.99007	16.159	3	0.94267	3.1392	3	0.98298	14.256	3	1.3663	15.23	6	1.3114	19.26
A1L390	Pleckstrin homology domain-containing family G member 3	KIAA0599;PLEKHG3	S962	0.897662	5.33	0.65269	25.93	1.19442	12.53	0.714957	7.88	0.777498	57.77	0.66997	59.19	0.490498	23.79	0.632733	19.01	0.82815	PERDGKSPTVPCI	GO:0005622	GO:0005543;GO:0005089	GO:0035023	0	1	0.65269	25.929	3	1.2058	11.379	3	1.83	12.527	3	0.7271	5.3307	4	0.87733	30.388	4	1.0954	7.8831	4	0.66997	59.185	5	0.58292	20.608
A2AJT9	Uncharacterized protein CXorf23	CXorf23	S139	0.978213	28.12	1.2347	11.25	1.25742	18.93	1.47497	28.61			1.2524	14.9	1.19868	45.92			1	KVQGGHSPDDHRV	GO:0005739			0	n/a	1.2347	11.253	5	1.2542	21.271	5	1.0184	18.933	5	1.2622	28.122	8	1.2339	19.211	8	1.1946	28.607	8	1.2524	14.896	6	1.2342	34.562
A2AJT9	Uncharacterized protein CXorf23	CXorf23	S15	0.928446	28.82	1.112	11.31	1.09539	32.7	1.24655	18.73	0.96779	25.41	1.1778	10.69	1.248	12.98	1.20041	23.22	1	PRWKHRSISPVPR	GO:0005739			0	0	1.112	11.311	5	1.0352	22.62	5	0.98506	32.704	5	1.1977	28.817	9	1.4034	31.978	9	1.121	18.731	9	1.1778	10.688	14	1.2196	6.206
A2AJT9	Uncharacterized protein CXorf23	CXorf23	S17	0.928446	28.82	1.112	11.31	1.09539	32.7	1.24655	18.73	0.96779	25.41	1.1778	10.69	1.248	12.98	1.20041	23.22	1	WKHRSISPVPRNA	GO:0005739			0	0	1.112	11.311	5	1.0352	22.62	5	0.98506	32.704	5	1.1977	28.817	9	1.4034	31.978	9	1.121	18.731	9	1.1778	10.688	14	1.2196	6.206
A2RRP1	Neuroblastoma-amplified gene protein;Neuroblastoma-amplified sequence	NAG;NBAS	S473									0.907758	23.07	0.91384	4.47	0.671234	1.33	0.745017	12.96	0.498229	DEGEEDSDSDYEI	GO:0043231;GO:0005759	GO:0004739	GO:0006096;GO:0006090;GO:0010510	n/a	0										1.1032	5.1671	2	0.75329	8.5516	2	0.78802	22.953	2	0.91384	4.4718	2	0.58241	20.712
A2RRP1	Neuroblastoma-amplified gene protein;Neuroblastoma-amplified sequence	NAG;NBAS	S475	0.907995	5.17	1.0017	11.58	0.936189	14.63	0.78936	22.95	1.07257	7.82	0.91384	4.47	0.671234	1.33	0.722071	4.37	0.498229	GEEDSDSDYEISA	GO:0043231;GO:0005759	GO:0004739	GO:0006096;GO:0006090;GO:0010510	0	0	1.0017	11.584	2	0.95727	7.4196	2	0.9346	14.632	2	1.1032	5.1671	2	0.75329	8.5516	2	0.78802	22.953	2	0.91384	4.4718	2	0.58241	20.712
A2RU67	Uncharacterized protein KIAA1467	KIAA1467	S30			1.0492	7.96	1.19137	4.64											0.967577	PITQADSDESEDD	GO:0016021			n/a	n/a	1.0492	7.9614	4	1.105	11.308	4	1.1355	4.6391	4
A2RU67	Uncharacterized protein KIAA1467	KIAA1467	S33			1.0492	7.96	1.19137	4.64											0.967577	QADSDESEDDIVI	GO:0016021			n/a	n/a	1.0492	7.9614	4	1.105	11.308	4	1.1355	4.6391	4
A2RU67	Uncharacterized protein KIAA1467	KIAA1467	S62	1.05064		0.94305	241.13	0.812466	16.1	0.725017		0.994306	24.06	0.68797	10.52	0.573375	11.94	0.635918	32.59	0.976245	EAPEPDSDAEVAE	GO:0016021			0	0	0.94305	241.13	6	0.71673	10.381	6	0.86153	16.097	6	0.8976		1	0.70922		1	0.7688		1	0.68797	10.515	5	0.70124	16.233
A4D177	Chromobox homolog 3 (HP1 gamma homolog, Drosophila);Chromobox homolog 3 (HP1 gamma homolog, Drosophila), isoform CRA_a;Coiled-coil domain containing 32, isoform CRA_c;Chromobox protein homolog 3;HECH;Heterochromatin protein 1 homolog gamma;Modifier 2 protein	CBX3;CCDC32;hCG_1745364;hCG_1999239;tcag7.173;CBX3	S176																	0.99343	ERITWHSCPEDEA	GO:0005634			n/a	n/a
A4D177	Chromobox homolog 3 (HP1 gamma homolog, Drosophila);Chromobox homolog 3 (HP1 gamma homolog, Drosophila), isoform CRA_a;Coiled-coil domain containing 32, isoform CRA_c;Chromobox protein homolog 3;HECH;Heterochromatin protein 1 homolog gamma;Modifier 2 protein	CBX3;CCDC32;hCG_1745364;hCG_1999239;tcag7.173;CBX3	S95	1.03387	10.715	1.10895	31.865	1.15406	73.585	1.15092	67.005	1.0276	44.56	1.00836	36.275	1.13784	76.145	1.12765	73.46	0.999864	TKRKSISDSESDD	GO:0005634			0	0	1.1961	50.646	75	1.1735	46.604	75	0.98826	36.454	75	1.1974	11.47	14	1.1537	9.0857	14	0.9416	35.968	14	0.93533	39.084	32	1.1876	24.494
A4D213	DKFZP586J0619 protein;DKFZP586J0619 protein;Integrator complex subunit 1	DKFZP586J0619;tcag7.531;DKFZP586J0619;tcag7.531;INTS1;KIAA1440;UNQ1821/PRO3434	S1523	1.08983	51.11	0.92734	29.78	1.0031	42.48	1.09797	29.36	1.06035	23.59	1.0682	43.7	0.536098	52.51	1.0854	16.75	0.884972	IPPRRDSTEAPKP				0	0	0.92734	29.783	6	0.92117	14.969	6	1.0817	42.477	6	0.8509	51.111	5	1.0098	22.342	5	1.184	29.359	5	1.0682	43.7	2	0.85712	12.956
A4D213	DKFZP586J0619 protein;DKFZP586J0619 protein;Integrator complex subunit 1	DKFZP586J0619;tcag7.531;DKFZP586J0619;tcag7.531;INTS1;KIAA1440;UNQ1821/PRO3434	S1531	1.20959		1.0206	34.23	1.43752	109.76	1.12215		0.914906	15.01	0.92314	30	0.486375	37.41	1.0726	13.01	0.5	EAPKPKSSPEQPI				0	6	1.0206	34.231	5	1.2971	127.72	5	1.4085	109.76	5	0.84376		1	1.0673		1	1.0995		1	0.92314	29.997	3	0.9425	17.289
A4D213	DKFZP586J0619 protein;DKFZP586J0619 protein;Integrator complex subunit 1	DKFZP586J0619;tcag7.531;DKFZP586J0619;tcag7.531;INTS1;KIAA1440;UNQ1821/PRO3434	S1532	1.20959		1.0206	34.23	1.43752	109.76	1.12215		0.914906	15.01	0.92314	30	0.486375	37.41	1.0726	13.01	0.5	APKPKSSPEQPIG				0	6	1.0206	34.231	5	1.2971	127.72	5	1.4085	109.76	5	0.84376		1	1.0673		1	1.0995		1	0.92314	29.997	3	0.9425	17.289
A4D213	DKFZP586J0619 protein;DKFZP586J0619 protein;Integrator complex subunit 1	DKFZP586J0619;tcag7.531;DKFZP586J0619;tcag7.531;INTS1;KIAA1440;UNQ1821/PRO3434	T1524	0.893976	30.33	0.87345	26.94	0.659402	75.9	1.0167	26.45	1.18314	23.59	1.1919	24.27	1.03564	20.59	1.21109	16.75	0.905329	PPRRDSTEAPKPK				0	0	0.87345	26.938	5	0.84476	28.612	5	0.75494	75.897	5	0.97704	30.332	9	1.1589	34.571	8	1.164	26.452	9	1.1919	24.268	5	1.0592	3.8495
A4D275	Actin related protein 2/3 complex, subunit 1B, 41kDa;Actin related protein 2/3 complex, subunit 1B, 41kDa, isoform CRA_a;cDNA, FLJ95695, Homo sapiens actin related protein 2/3 complex, subunit 1B, 41kDa(ARPC1B), mRNA;Actin-related protein 2/3 complex subunit 1B;Arp2/3 complex 41 kDa subunit;p41-ARC	ARPC1B;hCG_19475;tcag7.662;ARC41;ARPC1B	S310	0.76707	19.88	0.95692	3.25	1.00907	36.61	1.3972	20.4									0.853615	NIDKKASSEGGTA	GO:0005856	GO:0003779	GO:0030833	0	n/a	0.95692	3.251	2	1.0217	25.377	2	1.0545	36.611	2	1.2475	19.875	5	1.3407	27.335	5	1.4601	20.402	5
A4D275	Actin related protein 2/3 complex, subunit 1B, 41kDa;Actin related protein 2/3 complex, subunit 1B, 41kDa, isoform CRA_a;cDNA, FLJ95695, Homo sapiens actin related protein 2/3 complex, subunit 1B, 41kDa(ARPC1B), mRNA;Actin-related protein 2/3 complex subunit 1B;Arp2/3 complex 41 kDa subunit;p41-ARC	ARPC1B;hCG_19475;tcag7.662;ARC41;ARPC1B	S311																	0.445356	IDKKASSEGGTAA	GO:0005856	GO:0003779	GO:0030833	n/a	n/a
A4D2N6	Ubiquitin carboxyl-terminal hydrolase;Deubiquitinating enzyme 42;Ubiquitin carboxyl-terminal hydrolase 42;Ubiquitin thioesterase 42;Ubiquitin-specific-processing protease 42;Ubiquitin carboxyl-terminal hydrolase;Putative uncharacterized protein USP42	tcag7.880;USP42;USP42;tcag7.880;USP42;USP42	S1007	1.15809		0.93878	6.84	1.02252	22.06	0.952017										1	GHGDRISPGERRS		GO:0008234;GO:0004221	GO:0006511	0	n/a	0.93878	6.8449	8	0.99285	13.588	8	1.0892	22.055	8	0.81063		1	0.84698		1	1.0141		1
A4D2N6	Ubiquitin carboxyl-terminal hydrolase;Deubiquitinating enzyme 42;Ubiquitin carboxyl-terminal hydrolase 42;Ubiquitin thioesterase 42;Ubiquitin-specific-processing protease 42;Ubiquitin carboxyl-terminal hydrolase;Putative uncharacterized protein USP42	tcag7.880;USP42;USP42;tcag7.880;USP42;USP42	S1133	0.92019	15.51	0.82968	17.03	0.721324	60.47	1.21017	5.62									1	PHPDRFSHDRTAI		GO:0008234;GO:0004221	GO:0006511	0	n/a	0.82968	17.034	2	1.3218	6.7187	2	0.8694	60.465	2	0.90164	15.511	3	1.3705	3.959	3	1.4586	5.6186	3
A4D2N6	Ubiquitin carboxyl-terminal hydrolase;Deubiquitinating enzyme 42;Ubiquitin carboxyl-terminal hydrolase 42;Ubiquitin thioesterase 42;Ubiquitin-specific-processing protease 42;Ubiquitin carboxyl-terminal hydrolase;Putative uncharacterized protein USP42	tcag7.880;USP42;USP42;tcag7.880;USP42;USP42	S1166	1.05631	77.51	1.0252	28.97	1.23383	57.21	0.673802	61.52	1.50716	20.01	1.4268	27.35	1.84314	28.51	1.69818	23.2	0.999684	RKRRHDSVENSDS		GO:0008234;GO:0004221	GO:0006511	0	0	1.0252	28.967	12	1.215	36.801	12	1.2035	57.21	12	0.97055	77.514	19	1.1799	61.414	19	0.65724	61.523	19	1.4268	27.354	2	1.5388	3.1715
A4D2N6	Ubiquitin carboxyl-terminal hydrolase;Deubiquitinating enzyme 42;Ubiquitin carboxyl-terminal hydrolase 42;Ubiquitin thioesterase 42;Ubiquitin-specific-processing protease 42;Ubiquitin carboxyl-terminal hydrolase;Putative uncharacterized protein USP42	tcag7.880;USP42;USP42;tcag7.880;USP42;USP42	S1181	0.990214	15.62	0.93094	133.39	1.12541	70.3	1.25211	14.89	1.22602	1.99	0.99989	119.72	1.10998	29.65	0.99557	31.14	1	EKKARRSEQKDPI		GO:0008234;GO:0004221	GO:0006511	0	0	0.93094	133.39	12	1.2162	181.59	12	1.2089	70.297	12	0.94014	15.619	24	1.2902	12.884	24	1.345	14.885	24	0.99989	119.72	11	1.0639	155.79
A4D2N6	Ubiquitin carboxyl-terminal hydrolase;Deubiquitinating enzyme 42;Ubiquitin carboxyl-terminal hydrolase 42;Ubiquitin thioesterase 42;Ubiquitin-specific-processing protease 42;Ubiquitin carboxyl-terminal hydrolase	tcag7.880;USP42;USP42;tcag7.880;USP42	S1226	1.10897	12.97	1.1398	19.09	1.28273	36.88	1.18573	33.36	1.04008	19.21	1.0613	30.33	1.10174	14.51	1.0168	21.7	0.999829	DISAACSDADIHR		GO:0008234;GO:0004221	GO:0006511	0	0	1.1398	19.085	9	1.0809	17.854	9	1.1254	36.879	9	1.0278	12.972	18	0.93415	25.089	17	1.0403	33.364	18	1.0613	30.332	11	1.0717	10.412
A4D2N6	Ubiquitin carboxyl-terminal hydrolase;Deubiquitinating enzyme 42;Ubiquitin carboxyl-terminal hydrolase 42;Ubiquitin thioesterase 42;Ubiquitin-specific-processing protease 42;Ubiquitin carboxyl-terminal hydrolase;Putative uncharacterized protein USP42	tcag7.880;USP42;USP42;tcag7.880;USP42;USP42	S431	0.9992	15.08	0.89924	30.68	1.01767	27.99	1.14707	19.99			0.91547	17.99	0.717866	19.66			0.621275	THSPGQSSPRPVI		GO:0008234;GO:0004221	GO:0006511	0	n/a	0.89924	30.675	5	1.2288	35.28	5	1.1317	27.989	5	0.89996	15.076	14	1.1524	16.716	14	1.2756	19.988	14	0.91547	17.993	2	1.1033	13.663
A4D2N6	Ubiquitin carboxyl-terminal hydrolase;Deubiquitinating enzyme 42;Ubiquitin carboxyl-terminal hydrolase 42;Ubiquitin thioesterase 42;Ubiquitin-specific-processing protease 42;Ubiquitin carboxyl-terminal hydrolase;Putative uncharacterized protein USP42	tcag7.880;USP42;USP42;tcag7.880;USP42;USP42	S432			1.0896		1.07617												0.504212	HSPGQSSPRPVIS		GO:0008234;GO:0004221	GO:0006511	n/a	n/a	1.0896		1	1.2559		1	0.98767		1
A4D2N6	Ubiquitin carboxyl-terminal hydrolase;Deubiquitinating enzyme 42;Ubiquitin carboxyl-terminal hydrolase 42;Ubiquitin thioesterase 42;Ubiquitin-specific-processing protease 42;Ubiquitin carboxyl-terminal hydrolase;Putative uncharacterized protein USP42	tcag7.880;USP42;USP42;tcag7.880;USP42;USP42	S611	0.99073	3.92	1.1115	6.95	1.08734	0.48	1.20642	6.26									0.863486	VPYGAESSEDSDE		GO:0008234;GO:0004221	GO:0006511	0	n/a	1.1115	6.9466	2	1.2565	1.809	2	0.97826	0.48303	2	1.1219	3.917	4	1.2178	8.3812	4	1.0854	6.2572	4
A4D2N6	Ubiquitin carboxyl-terminal hydrolase;Deubiquitinating enzyme 42;Ubiquitin carboxyl-terminal hydrolase 42;Ubiquitin thioesterase 42;Ubiquitin-specific-processing protease 42;Ubiquitin carboxyl-terminal hydrolase;Putative uncharacterized protein USP42	tcag7.880;USP42;USP42;tcag7.880;USP42;USP42	S615	1.03357		1.1115	6.95	1.08734	0.48	1.26511										0.789549	AESSEDSDEESKG		GO:0008234;GO:0004221	GO:0006511	0	n/a	1.1115	6.9466	2	1.2565	1.809	2	0.97826	0.48303	2	1.0754		1	1.2058		1	1.1382		1
A4D2N6	Ubiquitin carboxyl-terminal hydrolase;Deubiquitinating enzyme 42;Ubiquitin carboxyl-terminal hydrolase 42;Ubiquitin thioesterase 42;Ubiquitin-specific-processing protease 42;Ubiquitin carboxyl-terminal hydrolase;cDNA FLJ53014, highly similar to Ubiquitin carboxyl-terminal hydrolase 42 (EC 3.1.2.15)	tcag7.880;USP42;USP42;tcag7.880;USP42	S75	1.0068	21.57	1.0811	27.75	1.31656	21.2	1.26424	24.67	1.27748	16.14	1.2297	21.8	1.21184	17.57	1.26241	11.43	0.990769	PDKSKPSPQKDQA		GO:0008234;GO:0004221	GO:0006511	0	0	1.0811	27.752	9	1.2494	8.7309	9	1.2178	21.203	9	1.0738	21.574	23	1.1935	24.377	23	1.1694	24.668	23	1.2297	21.799	35	1.0791	24.558
A4D2N6	Ubiquitin carboxyl-terminal hydrolase;Deubiquitinating enzyme 42;Ubiquitin carboxyl-terminal hydrolase 42;Ubiquitin thioesterase 42;Ubiquitin-specific-processing protease 42;Ubiquitin carboxyl-terminal hydrolase;Putative uncharacterized protein USP42	tcag7.880;USP42;USP42;tcag7.880;USP42;USP42	S759																	0.663678	GSPAAESIEEPDA		GO:0008234;GO:0004221	GO:0006511	n/a	n/a
A4D2N6	Ubiquitin carboxyl-terminal hydrolase;Deubiquitinating enzyme 42;Ubiquitin carboxyl-terminal hydrolase 42;Ubiquitin thioesterase 42;Ubiquitin-specific-processing protease 42;Putative uncharacterized protein USP42	tcag7.880;USP42;USP42;USP42	S856	0.981967	7.74	0.84895	21.27	0.830901	16.4	0.750642	23.51	1.00367	16.59	0.84106	14.115	0.838995	13.39	0.752799	14.345	1	EAPEGISPAPPAR		GO:0008234;GO:0004221	GO:0006511	0	0																			0.75187	21.805	2	0.93349	16.603
A4D2P0	cDNA FLJ77333, highly similar to Homo sapiens ras-related C3 botulinum toxin substrate 1 (rho family, small GTP binding protein Rac1) (RAC1), transcript variant Rac1b, mRNA;Ras-related C3 botulinum toxin substrate 1 (Rho family, small GTP binding protein Rac1);Ras-related C3 botulinum toxin substrate 1 (Rho family, small GTP binding protein Rac1), isoform CRA_e	hCG_14926;RAC1;tcag7.839	S71	0.74529	21.92	0.54351	8.4	0.992178	12.66	0.965872	31.37									0.897306	DRIRPISYPQTVG		GO:0005525		0	n/a	0.54351	8.3954	2	1.0088	2.2655	2	1.8255	12.661	2	0.72926	21.923	3	1.5375	26.362	3	1.7771	31.367	3
A4D2Q0	Unc-84 homolog A (C. elegans)	tcag7.1079;UNC84A	S391	1.14338	44.29	1.1281	51.85	1.30442	13.56	0.407199	158.57									0.990707	TAAHSQSPRIPGR	GO:0031965			5	n/a	1.1281	51.854	5	1.4244	11.103	5	1.1563	13.564	5	0.98664	44.292	2	1.1885	23.418	2	0.36096	158.57	2
A4QPE1	ENOX2 protein;APK1 antigen;Cytosolic ovarian carcinoma antigen 1;Ecto-NOX disulfide-thiol exchanger 2;Hydroquinone [NADH] oxidase;Protein disulfide-thiol oxidoreductase;Tumor-associated hydroquinone oxidase;Ecto-NOX disulfide-thiol exchanger 2	ENOX2;COVA1;ENOX2;ENOX2;RP5-875H3.1-002	S268	1.00444	6.26	1.0408	9.08	1.00281	15.99	0.867871	27.46			0.86539	14.37	0.847926	10.65			0.999795	ERIRPPSPPPVVH		GO:0003676;GO:0000166		0	n/a	1.0408	9.0811	10	0.86983	12.268	10	0.9635	15.987	10	1.0362	6.256	2	0.93892	10.416	2	0.83385	27.461	2	0.86539	14.367	7	0.9022	8.7292
A5YVE9	cDNA FLJ59461, highly similar to Pyruvate dehydrogenase E1 component alpha subunit, somatic form, mitochondrial (EC 1.2.4.1);Mitochondrial PDHA1;cDNA FLJ54787, highly similar to Pyruvate dehydrogenase E1 component alpha subunit, somatic form, mitochondrial (EC 1.2.4.1);PDHE1-A type I;Pyruvate dehydrogenase E1 component subunit alpha, somatic form, mitochondrial;cDNA FLJ52314, highly similar to Py…	PDHA1;PDHA1;PHE1A;PDHA1;RP11-723P2.1-002;PDHA2;PDHAL	S331	1.01064	15.01	1.1021	18	1.64136	43.45	1.56906	19.97	2.02963		2.0479	22.66	1.74821	29.45	1.27414		0.995744	YRYHGHSMSDPGV				0	8	1.1021	17.999	31	1.4937	22.684	31	1.4893	43.453	31	1.0905	15.011	24	1.4197	14.173	24	1.4237	19.97	24	2.0479	22.663	11	1.4377	22.822
A5YVE9	cDNA FLJ59461, highly similar to Pyruvate dehydrogenase E1 component alpha subunit, somatic form, mitochondrial (EC 1.2.4.1);Mitochondrial PDHA1;cDNA FLJ54787, highly similar to Pyruvate dehydrogenase E1 component alpha subunit, somatic form, mitochondrial (EC 1.2.4.1);PDHE1-A type I;Pyruvate dehydrogenase E1 component subunit alpha, somatic form, mitochondrial;cDNA FLJ52314, highly similar to Py…	PDHA1;PDHA1;PHE1A;PDHA1;RP11-723P2.1-002;PDHA2;PDHAL	S338	1.11378	30.88	1.81	69.11	2.40386	32.6	2.25743	21.12	2.30796	11.26	3.7165		0.944586		1.33887	23	0.999463	MSDPGVSYRTREE				4	8	1.81	69.112	10	2.3984	56.693	10	1.3281	32.604	10	1.6251	30.884	34	1.9209	16.634	34	1.2472	21.121	34	3.7165		1	1.4876
A6ND36	Protein FAM83G	FAM83G	S688																	0.5	RMQAQRSTDKEAQ				n/a	n/a										1.1904		1	0.98646		1	1.0243		1
A6ND36	Protein FAM83G	FAM83G	T689																	0.5	MQAQRSTDKEAQG				n/a	n/a										1.1904		1	0.98646		1	1.0243		1
A6NFH5	Fatty acid-binding protein 12	FABP12	S13	1.00885	13.83	0.95861	6.36	0.978166	7.54	0.942084	14.98	1.33389	3.37	0.99887	4.34	1.01885	4.51	1.03723	4.99	0.979366	GTWKSISCENSED		GO:0008289;GO:0005215		0	0	0.95861	6.3611	5	0.96667	7.5126	5	1.0204	7.5449	5	0.9502	13.825	5	0.87848	9.362	5	0.98276	14.977	5	0.99887	4.3381	4	0.98628	6.1393
A6NFI3	Zinc finger protein 316	ZNF316	S10	0.920375	15.33	0.97118	11.69	1.01401	14.3	1.02527	13.26	0.932486	26.7	0.930145	13.54	0.997394	21.435	0.9117	10.31	0.999994	IHTTPDSPAAQIE	GO:0005634	GO:0003677;GO:0008270	GO:0006355;GO:0006351	0	0	0.96514		1	0.83606		1	1.0205		1										0.88402	11.329	4	0.89714	14.947
A6NFI3	Zinc finger protein 316	ZNF316	S112	0.974318	19.26	1.1571	38.91	1.22143	24.21	1.32106	22.92	1.04501	21.7	1.0216	28.25	1.2108	32.16	1.12376	29.27	1	RGGDAKSPVIQEK	GO:0005634	GO:0003677;GO:0008270	GO:0006355;GO:0006351	0	0	1.1571	38.91	44	1.21	38.982	44	1.0556	24.213	44	1.1876	19.264	14	1.1483	28.527	14	1.1417	22.917	14	1.0216	28.246	22	1.261	15.733
A6NFN2	Putative uncharacterized protein ABI1;Abelson interactor 1;Abl interactor 1;Abl-binding protein 4;e3B1;Eps8 SH3 domain-binding protein;Nap1-binding protein;Spectrin SH3 domain-binding protein 1;cDNA FLJ52872, moderately similar to Homo sapiens abl-interactor 1 (ABI1), transcript variant 3, mRNA	ABI1;ABI1;SSH3BP1	S226	1.01615	39.63	1.07295	60.37	1.1606	19.51	1.27209	80.15	0.741441	8.29	1.0633	87.57	1.04157	125.5	1.21594	11.68	0.999975	RIGSQHSPGRTAS	GO:0005737			0	0	1.0687	117.93	20	1.2178	55.238	20	1.1821	34.583	20	1.0559	39.634	11	1.2079	41.359	11	1.1856	80.148	11	1.0633	87.572	16	1.2821	118.48
A6NFN2	Putative uncharacterized protein ABI1;Abelson interactor 1;Abl interactor 1;Abl-binding protein 4;e3B1;Eps8 SH3 domain-binding protein;Nap1-binding protein;Spectrin SH3 domain-binding protein 1;cDNA FLJ52872, moderately similar to Homo sapiens abl-interactor 1 (ABI1), transcript variant 3, mRNA	ABI1;ABI1;SSH3BP1	T179	0.849207		0.75621	88.24	0.770502	27.06	0.673836		0.766463	18.33	0.72161		0.742392		0.701759	18.63	0.582057	SRTNPPTQKPPSP	GO:0005737			0	0	0.75621	88.236	6	0.71866	13.943	6	1.0189	27.059	6	0.89049		1	0.74623		1	0.89107		1	0.72161		1	0.71473
A6NHB5	Putative uncharacterized protein ZMYM3;Zinc finger MYM-type protein 3;Zinc finger protein 261;Putative uncharacterized protein ZMYM3;Putative uncharacterized protein ZMYM3;Zinc finger protein 261;ZMYM3 protein	ZMYM3;DXS6673E;KIAA0385;ZMYM3;ZNF261;ZMYM3;ZMYM3;ZMYM3	S466	0.822212	46.26	0.918	19.63	1.01577	15.56	0.886917	19.73	0.962707	22.52	1.0455	19.52	1.07812	10.55	1.01217	13.15	0.892556	IYTKTGSPGPEII		GO:0008270		0	0	0.918	19.634	17	1.018	21.764	17	1.1065	15.559	17	1.1165	46.256	6	1.0524	34.531	6	0.96614	19.727	6	1.0455	19.52	6	0.94013	22.304
A6NHB5	Putative uncharacterized protein ZMYM3;Zinc finger MYM-type protein 3;Zinc finger protein 261;Putative uncharacterized protein ZMYM3	ZMYM3;DXS6673E;KIAA0385;ZMYM3;ZNF261;ZMYM3	S770																	0.350254	TQSGPESIINSQS		GO:0008270		n/a	n/a
A6NHB5	Putative uncharacterized protein ZMYM3;Zinc finger MYM-type protein 3;Zinc finger protein 261;Putative uncharacterized protein ZMYM3;Putative uncharacterized protein ZMYM3;Zinc finger protein 261;ZMYM3 protein	ZMYM3;DXS6673E;KIAA0385;ZMYM3;ZNF261;ZMYM3;ZMYM3;ZMYM3	T464	0.866454		0.97944	11.97	0.995209	11.32	1.01969		2.23423		1.3627	3.28	1.31428	9.31	1.43138		0.5	AYIYTKTGSPGPE		GO:0008270		0	8	0.97944	11.967	3	1.1345	18.101	3	1.0161	11.321	3	1.1304		1	1.0192		1	1.0411		1	1.3627	3.2786	3	1.071	6.5172
A6NHU9	Putative uncharacterized protein SHANK2;Cortactin-binding protein 1;Proline-rich synapse-associated protein 1;SH3 and multiple ankyrin repeat domains protein 2	SHANK2;CORTBP1;KIAA1022;PROSAP1;SHANK2	S421	1.03119	14.47	1.0257	9.56	0.833792	13.39	0.902708	13.39	1.15987	11.08	1.0525	21.14	0.996286	28.51	0.921327	7.86	0.499703	PRVIIRSNSDNNI				0	0	1.0257	9.5601	6	0.80743	25.1	6	0.8129	13.393	6	0.99468	14.468	7	0.91756	17.503	7	0.88009	13.388	7	1.0525	21.138	3	1.0635	5.0743
A6NHU9	Putative uncharacterized protein SHANK2;Cortactin-binding protein 1;Proline-rich synapse-associated protein 1;SH3 and multiple ankyrin repeat domains protein 2	SHANK2;CORTBP1;KIAA1022;PROSAP1;SHANK2	S423									1.274	7.69	1.1371		1.17531		1.0865	18.74	0.604818	VIIRSNSDNNINA				n/a	0										1.0053		1	0.9134		1	0.84308		1	1.1371		1	0.96785
A6NHU9	Putative uncharacterized protein SHANK2;Cortactin-binding protein 1;Proline-rich synapse-associated protein 1;SH3 and multiple ankyrin repeat domains protein 2	SHANK2;CORTBP1;KIAA1022;PROSAP1;SHANK2	T1279	0.808651	7.67	0.84407	18.14	0.41665	109.87	0.867535	28.75	0.302165		0.74686	15.62	0.712841	38.97	1.43128		0.999741	PIRRQETENKYET				6	4	0.84407	18.142	2	1.0169	19.232	2	0.49362	109.87	2	1.0438	7.6651	9	1.0714	10.16	9	1.0278	28.746	9	0.74686	15.622	8	0.73904	18.706
A6NJZ6	Putative uncharacterized protein IGSF3;Glu-Trp-Ile EWI motif-containing protein 3;Immunoglobulin superfamily member 3	IGSF3;EWI3;IGSF3;KIAA0466	S1178			0.65438		1.04786												0.760671	RNSSKNSDGKNGV				n/a	n/a	0.65438		1	0.9015		1	1.6013		1
A6NJZ6	Putative uncharacterized protein IGSF3;Glu-Trp-Ile EWI motif-containing protein 3;Immunoglobulin superfamily member 3	IGSF3;EWI3;IGSF3;KIAA0466	T1199																	0.761155	HINYSPTCIEPPV				n/a	n/a
A6NKD9	Coiled-coil domain-containing protein 85C	CCDC85C	S246	1.1493	13.43	1.244	15.5	1.08285	28.29	1.00503	13.4	1.08789	53.59	1.2254	13.12	1.48286	13.58	1.06948	14.84	1	AGATRRSIDDISA	GO:0005923	GO:0005524;GO:0004693;GO:0004674	GO:0021987	0	0	1.244	15.498	15	0.974	25.413	15	0.87046	28.293	15	1.0824	13.427	26	0.80635	23.769	26	0.8079	13.401	26	1.2254	13.116	10	1.2912	7.0273
A7KAX9	Brain-specific Rho GTPase-activating protein;GAB-associated Cdc42/Rac GTPase-activating protein;GC-GAP;GTPase regulator interacting with TrkA;p200RhoGAP;p250GAP;Rho GTPase-activating protein 32;Rho/Cdc42/Rac GTPase-activating protein RICS;RhoGAP involved in the beta-catenin-N-cadherin and NMDA receptor signaling;Rho-type GTPase-activating protein 32	ARHGAP32;GRIT;KIAA0712;RICS	S952			1.0726		0.82041				0.661104	33.37	0.81415	23.48	0.859824	27.35	0.681093	23.46	0.775887	RDATNRSPTQIVK	GO:0005938;GO:0030054;GO:0005829;GO:0005789;GO:0010008;GO:0000139;GO:0005886;GO:0014069;GO:0045211	GO:0005096;GO:0035091;GO:0005515	GO:0051056;GO:0007264	n/a	0	1.0726		1	0.74804		1	0.76488		1										0.81415	23.483	6	0.98875	28.613
A7KAX9	Brain-specific Rho GTPase-activating protein;GAB-associated Cdc42/Rac GTPase-activating protein;GC-GAP;GTPase regulator interacting with TrkA;p200RhoGAP;p250GAP;Rho GTPase-activating protein 32;Rho/Cdc42/Rac GTPase-activating protein RICS;RhoGAP involved in the beta-catenin-N-cadherin and NMDA receptor signaling;Rho-type GTPase-activating protein 32	ARHGAP32;GRIT;KIAA0712;RICS	T711	1.19961		1.4321	18.66	1.47979	21.63	1.39547		0.935242	10.42	0.90754		0.978237		0.68905	28.74	0.746852	KSEESITSIHAVD	GO:0005938;GO:0030054;GO:0005829;GO:0005789;GO:0010008;GO:0000139;GO:0005886;GO:0014069;GO:0045211	GO:0005096;GO:0035091;GO:0005515	GO:0051056;GO:0007264	0	0	1.4321	18.656	9	1.4042	32.979	9	1.0333	21.634	9	1.1938		1	0.9516		1	0.97442		1	0.90754		1	1.2548
A7KAX9	Brain-specific Rho GTPase-activating protein;GAB-associated Cdc42/Rac GTPase-activating protein;GC-GAP;GTPase regulator interacting with TrkA;p200RhoGAP;p250GAP;Rho GTPase-activating protein 32;Rho/Cdc42/Rac GTPase-activating protein RICS;RhoGAP involved in the beta-catenin-N-cadherin and NMDA receptor signaling;Rho-type GTPase-activating protein 32	ARHGAP32;GRIT;KIAA0712;RICS	T873																	0.611263	TIDISPTEDKSSK	GO:0005938;GO:0030054;GO:0005829;GO:0005789;GO:0010008;GO:0000139;GO:0005886;GO:0014069;GO:0045211	GO:0005096;GO:0035091;GO:0005515	GO:0051056;GO:0007264	n/a	n/a
A8CG34	Nuclear envelope pore membrane protein POM 121C;Nuclear pore membrane protein 121-2;Pore membrane protein of 121 kDa C	POM121C	S322	0.882775	15.31	0.88869	20.4	1.07567	12.51	0.99631	16.81	0.952361		0.88241	176.34	0.887351	10.74	0.634541		0.66783	KRRRHDSSGSGHS	GO:0005789;GO:0031965;GO:0005643;GO:0005737;GO:0005829;GO:0005654;GO:0005634;GO:0030529	GO:0005515;GO:0003677;GO:0003723;GO:0031625	GO:0051028;GO:0015031;GO:0045087;GO:0050687;GO:0032480;GO:0000398;GO:0043161;GO:0009615	0	0	0.88869	20.395	6	1.0471	31.408	6	1.2104	12.511	6	1.0067	15.313	14	1.0796	17.908	14	1.1211	16.813	14	0.88241	176.34	13	0.99234	15.054
A8CG34	Nuclear envelope pore membrane protein POM 121C;Nuclear pore membrane protein 121-2;Pore membrane protein of 121 kDa C	POM121C	S323	0.980939	16.67	0.967	27.13	1.25227	18.12	1.21968	14.37	1.61638	3.53	0.98179	14.17	1.01664	9.81	0.938699	10.45	0.66783	RRRHDSSGSGHSA	GO:0005789;GO:0031965;GO:0005643;GO:0005737;GO:0005829;GO:0005654;GO:0005634;GO:0030529	GO:0005515;GO:0003677;GO:0003723;GO:0031625	GO:0051028;GO:0015031;GO:0045087;GO:0050687;GO:0032480;GO:0000398;GO:0043161;GO:0009615	0	0	0.967	27.125	3	1.2203	48.834	3	1.295	18.117	3	0.98579	16.673	14	1.1485	20.478	14	1.2613	14.372	14	0.98179	14.171	8	1.0568	8.7438
A8CG34	Nuclear envelope pore membrane protein POM 121C;Nuclear pore membrane protein 121-2;Pore membrane protein of 121 kDa C	POM121C	S325	0.910564	13.46	0.88495	22.13	1.13628	71.91	0.980259	24.94	1.57654	14.66	0.98179	14.75	1.00064	11.43	0.915323	7.53	0.783978	RHDSSGSGHSAFE	GO:0005789;GO:0031965;GO:0005643;GO:0005737;GO:0005829;GO:0005654;GO:0005634;GO:0030529	GO:0005515;GO:0003677;GO:0003723;GO:0031625	GO:0051028;GO:0015031;GO:0045087;GO:0050687;GO:0032480;GO:0000398;GO:0043161;GO:0009615	0	0	0.88495	22.129	9	1.1285	27.344	9	1.284	71.905	9	0.97187	13.458	7	1.1115	23.391	7	1.1077	24.935	7	0.98179	14.748	6	1.0124	7.23
A8CG34	Nuclear envelope pore membrane protein POM 121C;Nuclear pore membrane protein 121-2;Pore membrane protein of 121 kDa C	POM121C	S328	0.543373	16.66	0.66123		0.512876		0.67862	3.19	1.18586		0.92503	85.57	1.02965	11.27	0.862405		0.996492	SSGSGHSAFEPIV	GO:0005789;GO:0031965;GO:0005643;GO:0005737;GO:0005829;GO:0005654;GO:0005634;GO:0030529	GO:0005515;GO:0003677;GO:0003723;GO:0031625	GO:0051028;GO:0015031;GO:0045087;GO:0050687;GO:0032480;GO:0000398;GO:0043161;GO:0009615	0	0	0.66123		1	0.69993		1	0.77564		1	1.2169	16.659	2	1.1361	14.317	2	1.0263	3.1944	2	0.92503	85.572	8	1.1736	18.835
A8CG34	Nuclear envelope pore membrane protein POM 121C;Nuclear pore membrane protein 121-2;Pore membrane protein of 121 kDa C;Nuclear envelope pore membrane protein POM 121;Nuclear envelope pore membrane protein POM 121A;Nucleoporin Nup121;Pore membrane protein of 121 kDa;Putative uncharacterized protein POM121	POM121C;KIAA0618;NUP121;POM121;POM121A;POM121	S358	0.895911	44.71	1.0759	18.3	0.984158	40.61	0.586118	39.38	0.970199		1.0548	32.54	0.667477	46.28	0.946556		0.887079	GINSQSSDDHINK	GO:0005789;GO:0031965;GO:0005643;GO:0005737;GO:0005829;GO:0005654;GO:0005634;GO:0030529	GO:0005515;GO:0003677;GO:0003723;GO:0031625	GO:0051028;GO:0015031;GO:0045087;GO:0050687;GO:0032480;GO:0000398;GO:0043161;GO:0009615	0	0	1.0759	18.3	3	1.004	10.261	3	0.91473	40.608	3	1.2009	44.714	5	0.9298	54.394	5	0.54477	39.379	5	1.0548	32.535	3	0.95925	29.17
A8CG34	Nuclear envelope pore membrane protein POM 121C;Nuclear pore membrane protein 121-2;Pore membrane protein of 121 kDa C	POM121C	S372																	0.451566	SRSSSMSSITGAY	GO:0005789;GO:0031965;GO:0005643;GO:0005737;GO:0005829;GO:0005654;GO:0005634;GO:0030529	GO:0005515;GO:0003677;GO:0003723;GO:0031625	GO:0051028;GO:0015031;GO:0045087;GO:0050687;GO:0032480;GO:0000398;GO:0043161;GO:0009615	n/a	n/a
A8CG34	Nuclear envelope pore membrane protein POM 121C;Nuclear pore membrane protein 121-2;Pore membrane protein of 121 kDa C	POM121C	S373																	0.466115	RSSSMSSITGAYT	GO:0005789;GO:0031965;GO:0005643;GO:0005737;GO:0005829;GO:0005654;GO:0005634;GO:0030529	GO:0005515;GO:0003677;GO:0003723;GO:0031625	GO:0051028;GO:0015031;GO:0045087;GO:0050687;GO:0032480;GO:0000398;GO:0043161;GO:0009615	n/a	n/a
A8CG34	Nuclear envelope pore membrane protein POM 121C;Nuclear pore membrane protein 121-2;Pore membrane protein of 121 kDa C;Putative uncharacterized protein POM121C	POM121C;POM121C	S441	1.48825	30.7	0.99552		1.61264		0.848103	35.64			0.99206	18.66	1.25674	16.49			0.671077	EEICHHSSSSTPI	GO:0005789;GO:0031965;GO:0005643;GO:0005737;GO:0005829;GO:0005654;GO:0005634;GO:0030529	GO:0005515;GO:0003677;GO:0003723;GO:0031625	GO:0051028;GO:0015031;GO:0045087;GO:0050687;GO:0032480;GO:0000398;GO:0043161;GO:0009615	0	n/a	0.99552		1	1.3883		1	1.6199		1	0.66892	30.701	2	0.7336	13.631	2	0.85192	35.642	2	0.99206	18.663	2	1.2716	2.791
A8CG34	Nuclear envelope pore membrane protein POM 121C;Nuclear pore membrane protein 121-2;Pore membrane protein of 121 kDa C;Putative uncharacterized protein POM121C	POM121C;POM121C	S442																	0.331184	EICHHSSSSTPIA	GO:0005789;GO:0031965;GO:0005643;GO:0005737;GO:0005829;GO:0005654;GO:0005634;GO:0030529	GO:0005515;GO:0003677;GO:0003723;GO:0031625	GO:0051028;GO:0015031;GO:0045087;GO:0050687;GO:0032480;GO:0000398;GO:0043161;GO:0009615	n/a	n/a
A8CG34	Nuclear envelope pore membrane protein POM 121C;Nuclear pore membrane protein 121-2;Pore membrane protein of 121 kDa C;Putative uncharacterized protein POM121C	POM121C;POM121C	S443																	0.331184	ICHHSSSSTPIAA	GO:0005789;GO:0031965;GO:0005643;GO:0005737;GO:0005829;GO:0005654;GO:0005634;GO:0030529	GO:0005515;GO:0003677;GO:0003723;GO:0031625	GO:0051028;GO:0015031;GO:0045087;GO:0050687;GO:0032480;GO:0000398;GO:0043161;GO:0009615	n/a	n/a
A8CG34	Nuclear envelope pore membrane protein POM 121C;Nuclear pore membrane protein 121-2;Pore membrane protein of 121 kDa C;Putative uncharacterized protein POM121C	POM121C;POM121C	S444																	0.331184	CHHSSSSTPIAAD	GO:0005789;GO:0031965;GO:0005643;GO:0005737;GO:0005829;GO:0005654;GO:0005634;GO:0030529	GO:0005515;GO:0003677;GO:0003723;GO:0031625	GO:0051028;GO:0015031;GO:0045087;GO:0050687;GO:0032480;GO:0000398;GO:0043161;GO:0009615	n/a	n/a
A8CG34	Nuclear envelope pore membrane protein POM 121C;Nuclear pore membrane protein 121-2;Pore membrane protein of 121 kDa C	POM121C	T375																	0.542259	SSMSSITGAYTSG	GO:0005789;GO:0031965;GO:0005643;GO:0005737;GO:0005829;GO:0005654;GO:0005634;GO:0030529	GO:0005515;GO:0003677;GO:0003723;GO:0031625	GO:0051028;GO:0015031;GO:0045087;GO:0050687;GO:0032480;GO:0000398;GO:0043161;GO:0009615	n/a	n/a
A8CG34	Nuclear envelope pore membrane protein POM 121C;Nuclear pore membrane protein 121-2;Pore membrane protein of 121 kDa C;Putative uncharacterized protein POM121C;Putative nuclear envelope pore membrane protein POM 121B;Nuclear envelope pore membrane protein POM 121;Nuclear envelope pore membrane protein POM 121A;Nucleoporin Nup121;Pore membrane protein of 121 kDa;Putative uncharacterized protein PO…	POM121C;POM121C;POM121B;KIAA0618;NUP121;POM121;POM121A;POM121	T424	0.881515	20.84	1.0892	29.16	1.26968	25.98	1.07736	36.31	0.978082	16.89	0.73451	3.74	0.663755	56.52	0.74516	11.85	0.982241	ASSRSQTPERPAK	GO:0005789;GO:0031965;GO:0005643;GO:0005737;GO:0005829;GO:0005654;GO:0005634;GO:0030529	GO:0005515;GO:0003677;GO:0003723;GO:0031625	GO:0051028;GO:0015031;GO:0045087;GO:0050687;GO:0032480;GO:0000398;GO:0043161;GO:0009615	0	0	1.0892	29.157	25	1.2152	26.287	25	1.1657	25.979	25	1.2356	20.838	18	1.1686	22.025	18	0.98913	36.308	18	0.73451	3.7379	2	0.94953	13.534
A8CG34	Nuclear envelope pore membrane protein POM 121C;Nuclear pore membrane protein 121-2;Pore membrane protein of 121 kDa C;Putative uncharacterized protein POM121C	POM121C;POM121C	T445	1.48825	30.7	0.99552		1.61264		0.848103	35.64			1.132	19.72	1.45881	11.7			0.331184	HHSSSSTPIAADK	GO:0005789;GO:0031965;GO:0005643;GO:0005737;GO:0005829;GO:0005654;GO:0005634;GO:0030529	GO:0005515;GO:0003677;GO:0003723;GO:0031625	GO:0051028;GO:0015031;GO:0045087;GO:0050687;GO:0032480;GO:0000398;GO:0043161;GO:0009615	0	n/a	0.99552		1	1.3883		1	1.6199		1	0.66892	30.701	2	0.7336	13.631	2	0.85192	35.642	2	1.132	19.721	3	1.297	4.4478
A8K1U6	cDNA FLJ75213;PCTAIRE protein kinase 2, isoform CRA_b;Cell division protein kinase 17;PCTAIRE-motif protein kinase 2;Serine/threonine-protein kinase PCTAIRE-2	hCG_33122;PCTK2;CDK17;PCTK2	S137	0.805928		1.1067	15.34	1.00867	26.02	0.958137				1.3623	7.44	1.38451	8.84			1	RIHRRISMEDINK				0	n/a	1.1067	15.337	4	0.94487	8.7098	4	0.91142	26.018	4	1.3732		1	0.98307		1	0.86576		1	1.3623	7.4362	2	1.101	50.757
A8MQC8	Putative uncharacterized protein DENND2C;DENN domain-containing protein 2C;Putative uncharacterized protein DENND2C	DENND2C;DENND2C;DENND2C	S271			0.71631		0.5307												1	GRSKRKSFEFEDI				n/a	n/a	0.71631		1	0.57256		1	0.74088		1
A8MQC8	Putative uncharacterized protein DENND2C;DENN domain-containing protein 2C;Putative uncharacterized protein DENND2C	DENND2C;DENND2C;DENND2C	S504	0.981742	24.02	0.8555	22.96	0.534285	129.22	1.07109	52.43	0.888598	8.66	0.84168	27.38	0.856157	17.5	0.692501	20.85	0.705411	SIQKKPSGISYIP				0	0	0.8555	22.962	2	0.88493	8.3875	2	0.62453	129.22	2	0.87141	24.021	5	1.1192	25.211	5	1.252	52.429	5	0.84168	27.38	5	1.1305	30.488
A8MSH7	Putative uncharacterized protein CUL4A;Cullin-4A	CUL4A;CUL4A	S10	0.828064	15.05	1.3673	49.6	1.39642	69.94	1.48571	13.57	0.7918	23.71	0.73506	26.78	1.18087	50.42	1.17793	17.88	0.978272	EAPRKGSFSAIVG	GO:0031461	GO:0031625	GO:0006511	0	0	1.3673	49.596	12	1.4624	21.231	12	1.0213	69.938	12	1.6512	15.049	15	1.8448	13.321	15	1.0866	13.568	15	0.73506	26.778	4	0.84838	24.358
A8MSQ1	Putative uncharacterized protein PHF14;PHD finger protein 14	PHF14;KIAA0783;PHF14	S290	1.44429	16.82	2.3204		2.01306		5.08516	20.29	1.13254	24.13	1.3219	11.51	1.94333	21.66	1.83361	7.14	0.843016	EEITNDSITISQS		GO:0008270		4	0	2.3204		1	1.7034		1	0.86755		1	1.6066	16.821	12	3.3036	22.497	12	2.1915	20.288	12	1.3219	11.512	5	1.681	6.1276
A8MSQ1	Putative uncharacterized protein PHF14;PHD finger protein 14	PHF14;KIAA0783;PHF14	S601											1.0329		0.902579				0.548634	VDNSDTSSSVDGR		GO:0008270		n/a	n/a																			1.0329		1	0.93422
A8MSQ1	Putative uncharacterized protein PHF14;PHD finger protein 14	PHF14;KIAA0783;PHF14	S602											1.0329		0.902579				0.563546	DNSDTSSSVDGRR		GO:0008270		n/a	n/a																			1.0329		1	0.93422
A8MSQ1	Putative uncharacterized protein PHF14;PHD finger protein 14	PHF14;KIAA0783;PHF14	S603											1.0329		0.902579				0.532551	NSDTSSSVDGRRK		GO:0008270		n/a	n/a																			1.0329		1	0.93422
A8MSQ1	Putative uncharacterized protein PHF14;PHD finger protein 14	PHF14;KIAA0783;PHF14	S835	0.859217	23.32	1.3848	45.41	1.74956	58.41	1.26234	22.93			1.1184	44.09	0.63836	36.75			1	TRGRKRSFVPEEE		GO:0008270		0	n/a	1.3848	45.41	5	1.5724	47.672	5	1.2634	58.412	5	1.6117	23.32	12	1.3933	28.806	12	0.91157	22.932	12	1.1184	44.091	10	0.65767	12.631
A8MTC3	Putative uncharacterized protein RAI1;Retinoic acid-induced protein 1;Putative uncharacterized protein RAI1	RAI1;KIAA1820;RAI1;RAI1	S1192			1.4415	10.78	1.70558	4.25											0.8742	TFKVSSSPQKEGR				n/a	n/a	1.4415	10.777	3	1.4147	3.0429	3	1.1832	4.2508	3
A8MTC3	Putative uncharacterized protein RAI1;Retinoic acid-induced protein 1;Putative uncharacterized protein RAI1	RAI1;KIAA1820;RAI1;RAI1	S1374			0.844405	4.29	0.594199	28.09			0.942981	13.4	0.82393		0.689885		0.733265	17.65	1	IKGAGGSPVGVEE				n/a	0	0.8561		1	0.73111		1	0.60121		1										0.82393		1	0.86074
A8MTC3	Putative uncharacterized protein RAI1;Retinoic acid-induced protein 1;Putative uncharacterized protein RAI1;Putative uncharacterized protein RAI1	RAI1;KIAA1820;RAI1;RAI1;RAI1	S916											1.1779		1.39593				0.867317	SKAGWGSPCHISG				n/a	n/a										1.1086		1	0.82611		1	0.72465		1	1.1779		1	1.1119
A8MTC3	Putative uncharacterized protein RAI1;Retinoic acid-induced protein 1;Putative uncharacterized protein RAI1	RAI1;KIAA1820;RAI1;RAI1	T1136			0.67269	51.54	0.702827	59.18											0.642225	ETDSPSTPGKDQR				n/a	n/a	0.67269	51.542	2	1.2892	4.4061	2	1.0448	59.181	2
A8MU08	Putative uncharacterized protein DOCK1;180 kDa protein downstream of CRK;Dedicator of cytokinesis protein 1	DOCK1;DOCK1	S1747	0.974853	18.04	1.3064	23.02	1.02534	47.58	1.04315	25.4			0.42624	105.97	0.396689	19.29			1	KKMHSRSQDKIDK		GO:0005525;GO:0051020;GO:0005085		0	n/a	1.3064	23.021	6	0.97938	55.5	6	0.78486	47.582	6	1.3401	18.044	9	1.1206	48.981	9	0.79849	25.397	9	0.42624	105.97	4	1.0494	38.189
A8MU17	Putative uncharacterized protein TRPT1;tRNA 2'-phosphotransferase 1	TRPT1;TRPT1	S242	1.29739	27.93	1.0618	21.58	1.05954	32.63	1.40115	39.65	0.523897	20.76	0.56277	33.58	0.579315	30.93	0.67977	11.9	0.974981	ETECQSSPKHSSR		GO:0016772	GO:0006388	0	0	1.0618	21.583	13	1.05	19.679	13	0.99787	32.631	13	0.81841	27.925	10	1.1588	47.512	10	1.3196	39.648	10	0.56277	33.58	7	0.83864	31.672
A8MUW4	Putative uncharacterized protein CELSR1;Cadherin EGF LAG seven-pass G-type receptor 1;Cadherin family member 9;Flamingo homolog 2	CELSR1;CDHF9;CELSR1;FMI2	S2871	0.945232	46.76	0.89971	26.57	0.965929	16.51	0.949464	10.27	1.12371	24.61	1.061	72.56	1.12636	13.92	1.15744	14.67	0.730886	DQSIAESDSEDPS	GO:0016021;GO:0005886	GO:0005509;GO:0004930	GO:0007156;GO:0007218	0	0	0.89971	26.573	7	0.8834	8.898	7	1.0736	16.51	7	0.95184	46.755	5	0.98588	20.502	5	1.0553	10.272	5	1.061	72.556	5	0.86074	9.6172
A8MV58	Putative uncharacterized protein DBN1;Developmentally-regulated brain protein;Drebrin	DBN1;D0S117E;DBN1	S391											1.1735		1.10004				0.674943	SDSSTASTPVAEQ	GO:0005622	GO:0003779		n/a	n/a										0.78969		1	1.0852		1	1.3001		1	1.1735		1	0.97715
A8MV58	Putative uncharacterized protein DBN1;Developmentally-regulated brain protein;Drebrin	DBN1;D0S117E;DBN1	T381																	0.496376	APTPIPTRSPSDS	GO:0005622	GO:0003779		n/a	n/a
A8MV58	Putative uncharacterized protein DBN1;Developmentally-regulated brain protein;Drebrin	DBN1;D0S117E;DBN1	T392											1.1735		1.10004				0.674724	DSSTASTPVAEQI	GO:0005622	GO:0003779		n/a	n/a										0.78969		1	1.0852		1	1.3001		1	1.1735		1	0.97715
A8MW06	Thymosin beta-4-like protein 3;Fx;Hematopoietic system regulatory peptide;Seraspenide;Thymosin beta-4;HCG1780554;Thymosin-like 4 (Pseudogene)	TMSL3;TB4X;THYB4;TMSB4;TMSB4X;hCG_1780554;RP11-339B21.6-001;TMSL4	S2	2.23429	24.01	1.9584	21.06	4.82237	154.38	1.70659	33.18	0.32819	11.97	0.97594	60.29	1.22715	27.66	0.356657	69.03	1	_____MSDKPDMA				4	3
A8MXB7	Putative uncharacterized protein SNX24;Sorting nexin-24	SNX24;SBBI31;SNX24;UNQ654/PRO1284	S146									0.420821		0.50974		0.613319		0.448627		1	SIPKAESCGSFDE		GO:0035091	GO:0007154	n/a	7										1.1102	8.454	5	1.0744	39.732	5	1.0178	37.384	5	0.50974		1	0.56646
A8MXB7	Putative uncharacterized protein SNX24;Sorting nexin-24	SNX24;SBBI31;SNX24;UNQ654/PRO1284	S149									0.420821		0.50974		0.613319		0.448627		0.999797	KAESCGSFDETES		GO:0035091	GO:0007154	n/a	7										1.1102	8.454	5	1.0744	39.732	5	1.0178	37.384	5	0.50974		1	0.56646
A8MXP9	Putative uncharacterized protein MATR3;Matrin-3	MATR3;KIAA0723;MATR3	S188	0.971399	15.415	0.92533	18.19	0.850355	23.935	1.06959	29.485	1.08839	10.405	0.97577	22.3	0.74403	37.38	0.821013	32.22	1	RHFRRDSFDDRGP	GO:0005634	GO:0003676;GO:0000166;GO:0008270		0	0	1.0343	21.923	52	1.0725	24.351	52	1.0202	27.252	52	1.1392	17.05	42	1.2254	18.02	42	1.057	16.004	42	1.1989	33.465	51	1.1304	37.924
A8MXP9	Putative uncharacterized protein MATR3;Matrin-3	MATR3;KIAA0723;MATR3	S206	1.44156	18.33	1.5713	93.75	2.2402	26.61	1.81139	56.04	1.16253	14.89	1.3304	51.82	1.47156	23.64	1.35541	22.29	0.999933	IDYDHGSRSQESG	GO:0005634	GO:0003676;GO:0000166;GO:0008270		4	0	1.5713	93.745	14	2.0466	35.514	14	1.4257	26.608	14	1.09	18.325	6	1.5643	21.621	6	1.1528	56.036	6	1.3304	51.816	22	1.8105	51.628
A8MXP9	Putative uncharacterized protein MATR3;Matrin-3;cDNA, FLJ79319, highly similar to Matrin-3;cDNA FLJ10526 fis, clone NT2RP2000931, highly similar to Matrin-3	MATR3;KIAA0723;MATR3	S596	0.81983	15.26	0.9765	110.98	1.19397	41.99	1.23488	23.06	1.10443	14.41	1.0563	30.25	0.925699	53.96	1.25309	12.11	0.839873	DKSRKRSYSPDGK	GO:0005634	GO:0003676;GO:0000166;GO:0008270		0	0	0.9765	110.98	17	1.2537	135.29	17	1.2227	41.986	17	1.1911	15.264	21	1.4107	20.906	21	1.2646	23.064	21	1.0563	30.248	20	1.112	35.495
A8MXP9	Putative uncharacterized protein MATR3;Matrin-3;cDNA, FLJ79319, highly similar to Matrin-3;cDNA FLJ10526 fis, clone NT2RP2000931, highly similar to Matrin-3	MATR3;KIAA0723;MATR3	S598	0.959397	34.385	1.00233	41.22	1.01506	54.735	1.01734	24.375	1.12453	23.465	1.0888	39.295	1.06372	87.2	0.984134	36.63	0.998969	SRKRSYSPDGKES	GO:0005634	GO:0003676;GO:0000166;GO:0008270		0	0	1.177	18.023	35	1.2989	19.506	35	1.0987	24.851	35	1.0375	37.986	14	1.0892	31.184	14	0.97575	38.493	14	1.1636	22.696	40	1.2354	54.632
A8MXP9	Putative uncharacterized protein MATR3;Matrin-3;cDNA, FLJ79319, highly similar to Matrin-3;cDNA FLJ10526 fis, clone NT2RP2000931, highly similar to Matrin-3	MATR3;KIAA0723;MATR3	S604	0.786812	34.07	0.962665	22.01	1.00694	15.475	0.811122	46.93	0.862308	22.18	0.888005	65.38	0.950578	35.24	1.03639	29.14	0.989845	SPDGKESPSDKKS	GO:0005634	GO:0003676;GO:0000166;GO:0008270		0	0	1.2695	15.088	10	1.3527	29.016	10	1.156	11.059	10	1.0492	34.072	13	1.1124	13.559	13	1.0602	46.931	13	1.3119		1	1.2435
A8MYX1	Putative uncharacterized protein ZNF326;Zinc finger protein 326;cDNA FLJ50345, highly similar to Zinc finger protein 326;Zinc finger protein 326, isoform CRA_a	ZNF326;ZNF326;hCG_22859;ZNF326	S268	0.836111		1.3846		2.19833		1.55131				1.32109		1.21121				0.56686	MEKISISKSPTKT				4	n/a	1.3846		1	1.7353		1	1.5877		1	1.656		1	2.213		1	1.1204		1	1.7184		1	1.5865
A8MYX1	Putative uncharacterized protein ZNF326;Zinc finger protein 326;cDNA FLJ50345, highly similar to Zinc finger protein 326;Zinc finger protein 326, isoform CRA_a	ZNF326;ZNF326;hCG_22859;ZNF326	S270	1.08781	22.7	1.09249	22.935	1.3537	34.9	1.03579	93.21	0.981044	18.33	1.10676	21.66	1.46281	16.37	1.32413	29.065	0.996462	KISISKSPTKTDP				0	0	1.2196	26.352	42	1.3901	34.14	42	1.2134	27.759	42	0.91261		1	0.39531		1	0.5678		1	1.2976	16.765	32	1.3501	9.8851
A8MZ22	Nucleosome assembly protein 1-like 4b;Putative uncharacterized protein NAP1L4;Nucleosome assembly protein 1-like 4;Nucleosome assembly protein 2;Putative uncharacterized protein NAP1L4;Putative uncharacterized protein NAP1L4;Putative uncharacterized protein NAP1L4	NAP1L4;NAP1L4b;NAP1L4;NAP2;NAP1L4;NAP1L4;NAP1L4	S125	1.06814	26.52	1.00643	69.42	0.661921	34.595	1.2526	49.38	0.993665		0.78894	21.83	0.49736	27.52	0.53988		1	AESEWHSENEEEE	GO:0005634		GO:0006334	0	1	0.87585	120.31	4	0.61411	104.34	4	0.76968	26.553	4	0.88715		1	1.1118		1	1.4787		1	0.50468		1	0.30622
A8MZ22	Nucleosome assembly protein 1-like 4b;Putative uncharacterized protein NAP1L4;Nucleosome assembly protein 1-like 4;Nucleosome assembly protein 2;Putative uncharacterized protein NAP1L4;Putative uncharacterized protein NAP1L4;Putative uncharacterized protein NAP1L4	NAP1L4;NAP1L4b;NAP1L4;NAP2;NAP1L4;NAP1L4;NAP1L4	S5	2.35452		1.4878		1.3206		1.62736		1.21403		1.1263		1.04087		0.641957		0.99936	__MADHSFSDGVP	GO:0005634		GO:0006334	8	0
A8MZE6	Putative uncharacterized protein CENPN;Centromere protein N;Interphase centromere complex protein 32	CENPN;BM-309;C16orf60;CENPN;ICEN32	S282									1.41543	28.04	1.5908	15.85	1.233	14.95	1.67957	27.1	0.999568	KSGINGSIIAERE				n/a	0																			1.5908	15.846	2	1.1275	8.0692
A9R9N7	Major histocompatibility complex, class I, A;HLA class I histocompatibility antigen, A-2 alpha chain;MHC class I antigen A*2;Aw-24;HLA class I histocompatibility antigen, A-24 alpha chain;HLA class I histocompatibility antigen, A-9 alpha chain;MHC class I antigen A*24;HLA class I histocompatibility antigen, A-23 alpha chain;HLA class I histocompatibility antigen, A-9 alpha chain;MHC class I antig…	DADB-123D8.3-002;HLA-A;HLAA;HLA-A;HLAA;HLA-A;HLAA;HLA-A;HLAA;HLA-A;HLAA;HLA-A;HLAA;HLA-A	S355			1.1349	7.67	1.83604	4.23											0.454967	SYSQAASSDSAQG	GO:0016021;GO:0042612		GO:0002474;GO:0006955	n/a	n/a	1.1349	7.6748	2	1.7403	2.1655	2	1.6178	4.2346	2
A9R9N7	Major histocompatibility complex, class I, A;HLA class I histocompatibility antigen, A-2 alpha chain;MHC class I antigen A*2;Aw-24;HLA class I histocompatibility antigen, A-24 alpha chain;HLA class I histocompatibility antigen, A-9 alpha chain;MHC class I antigen A*24;HLA class I histocompatibility antigen, A-23 alpha chain;HLA class I histocompatibility antigen, A-9 alpha chain;MHC class I antig…	DADB-123D8.3-002;HLA-A;HLAA;HLA-A;HLAA;HLA-A;HLAA;HLA-A;HLAA;HLA-A;HLAA;HLA-A;HLAA;HLA-A	S356			1.1649		1.61071						1.2433		1.94353				0.454951	YSQAASSDSAQGS	GO:0016021;GO:0042612		GO:0002474;GO:0006955	n/a	n/a	1.1649		1	1.6489		1	1.3827		1										1.2433		1	1.675
A9R9N7	Major histocompatibility complex, class I, A;HLA class I histocompatibility antigen, A-2 alpha chain;MHC class I antigen A*2;Aw-24;HLA class I histocompatibility antigen, A-24 alpha chain;HLA class I histocompatibility antigen, A-9 alpha chain;MHC class I antigen A*24;HLA class I histocompatibility antigen, A-23 alpha chain;HLA class I histocompatibility antigen, A-9 alpha chain;MHC class I antig…	DADB-123D8.3-002;HLA-A;HLAA;HLA-A;HLAA;HLA-A;HLAA;HLA-A;HLAA;HLA-A;HLAA;HLA-A;HLAA;HLA-A	S362	1.26943	24.05	1.0168	36.29	1.37909	11.23	1.09296	17.08	0.982813	86.95	1.1322	26.99	1.37834	23.73	1.38106	14.25	0.996931	SDSAQGSDVSITA	GO:0016021;GO:0042612		GO:0002474;GO:0006955	0	0	1.0168	36.292	11	1.5913	22.076	11	1.3563	11.23	11	0.80099	24.052	3	1.5215	47.85	3	1.0749	17.079	3	1.1322	26.994	6	1.1705	20.963
A9R9N7	Major histocompatibility complex, class I, A;HLA class I histocompatibility antigen, A-2 alpha chain;MHC class I antigen A*2;Aw-24;HLA class I histocompatibility antigen, A-24 alpha chain;HLA class I histocompatibility antigen, A-9 alpha chain;MHC class I antigen A*24;HLA class I histocompatibility antigen, A-23 alpha chain;HLA class I histocompatibility antigen, A-9 alpha chain;MHC class I antig…	DADB-123D8.3-002;HLA-A;HLAA;HLA-A;HLAA;HLA-A;HLAA;HLA-A;HLAA;HLA-A;HLAA;HLA-A;HLAA;HLA-A	S365	1.25116	7.32	1.0752	13.19	1.43324	12.33	1.56237	14.46	1.04434	29.37	0.9541	26.85	1.06363	15.48	1.11592	36.29	0.983955	AQGSDVSITACKV	GO:0016021;GO:0042612		GO:0002474;GO:0006955	0	0	1.0752	13.185	9	1.3652	37.296	9	1.333	12.328	9	0.85936	7.3181	4	1.6609	25.579	4	1.4531	14.46	4	0.9541	26.85	7	1.1358	21.212
B0QY62	Unc-84 homolog B (C. elegans);Protein unc-84 homolog B;Rab5-interacting protein;Sad1/unc-84 protein-like 2;SUN domain-containing protein 2;Unc-84 homolog B (C. elegans);Unc-84 homolog B (C. elegans)	RP3-508I15.15-002;UNC84B;FRIGG;KIAA0668;RAB5IP;SUN2;UNC84B;RP3-508I15.15-004;UNC84B;RP3-508I15.15-005;UNC84B	S110											1.059	50.22	0.925841	22.11			0.94881	RRGTGGSESSRAS				n/a	n/a										1.1969	28.418	10	1.1428	47.315	10	0.85676	42.12	10	1.059	50.219	4	1.0928	24.919
B0QY62	Unc-84 homolog B (C. elegans);Protein unc-84 homolog B;Rab5-interacting protein;Sad1/unc-84 protein-like 2;SUN domain-containing protein 2;Unc-84 homolog B (C. elegans);Unc-84 homolog B (C. elegans)	RP3-508I15.15-002;UNC84B;FRIGG;KIAA0668;RAB5IP;SUN2;UNC84B;RP3-508I15.15-004;UNC84B;RP3-508I15.15-005;UNC84B	S112											0.65663	58.34	0.694058	12.66			0.921512	GTGGSESSRASGI				n/a	n/a										1.0794		1	0.77694		1	0.84818		1	0.65663	58.335	2	0.90476	37.892
B0QY62	Unc-84 homolog B (C. elegans);Protein unc-84 homolog B;Rab5-interacting protein;Sad1/unc-84 protein-like 2;SUN domain-containing protein 2;Unc-84 homolog B (C. elegans);Unc-84 homolog B (C. elegans);Unc-84 homolog B (C. elegans);Unc-84 homolog B (C. elegans);Unc-84 homolog B (C. elegans);Unc-84 homolog B (C. elegans);Unc-84 homolog B (C. elegans)	RP3-508I15.15-002;UNC84B;FRIGG;KIAA0668;RAB5IP;SUN2;UNC84B;RP3-508I15.15-004;UNC84B;RP3-508I15.15-005;UNC84B;RP3-508I15.15-009;UNC84B;RP3-508I15.15-008;UNC84B;RP3-508I15.15-010;UNC84B;RP3-508I15.15-003;UNC84B;RP3-508I15.15-006;UNC84B	S38	0.902799	18.75	1.1452	35.05	1.28984	29.89	1.05784	22.88	1.30356	14.09	1.2997	78.41	1.09368	29.71	1.39874	26.36	0.687267	STIFKDSPIRTIK				0	0	1.1452	35.051	15	1.5741	36.777	15	1.1263	29.889	15	1.2685	18.746	5	1.2837	9.9269	5	0.92372	22.879	5	1.2997	78.405	7	1.2544	56.375
B0QY62	Unc-84 homolog B (C. elegans);Protein unc-84 homolog B;Rab5-interacting protein;Sad1/unc-84 protein-like 2;SUN domain-containing protein 2;Unc-84 homolog B (C. elegans);Unc-84 homolog B (C. elegans)	RP3-508I15.15-002;UNC84B;FRIGG;KIAA0668;RAB5IP;SUN2;UNC84B;RP3-508I15.15-004;UNC84B;RP3-508I15.15-005;UNC84B	T107											1.059	50.22	0.925841	22.11			0.998252	VRRRRGTGGSESS				n/a	n/a										1.1969	28.418	10	1.1428	47.315	10	0.85676	42.12	10	1.059	50.219	4	1.0928	24.919
B0S7P1	Bromodomain containing 2;Bromodomain-containing protein 2;O27.1.1;Really interesting new gene 3 protein;Bromodomain containing 2, isoform CRA_a;Putative uncharacterized protein DKFZp313H139;Bromodomain containing 2;Bromodomain containing 2	BRD2;DAMA-214M2.2-005;BRD2;KIAA9001;RING3;BRD2;DKFZp313H139;hCG_17503;BRD2;DAMC-226H3.7-005;BRD2;DAMC-226H3.7-001	S298	0.822052	10.19	0.82756	9.68	0.834098	3.22	1.01633	11.66	0.887639		1.0649	55.34	1.2159	10.48	1.42239		0.999658	AIIAPGSPASPPG				0	0	0.82756	9.6845	4	0.85174	22.893	4	1.0079	3.2239	4	1.0067	10.186	17	1.0966	6.8556	17	1.2281	11.662	17	1.0649	55.342	24	1.1283	12.451
B0S7P1	Bromodomain containing 2;Bromodomain-containing protein 2;O27.1.1;Really interesting new gene 3 protein;Bromodomain containing 2, isoform CRA_a;Putative uncharacterized protein DKFZp313H139;Bromodomain containing 2;Bromodomain containing 2	BRD2;DAMA-214M2.2-005;BRD2;KIAA9001;RING3;BRD2;DKFZp313H139;hCG_17503;BRD2;DAMC-226H3.7-005;BRD2;DAMC-226H3.7-001	S301	0.985021	7.15	0.99694	12.67	1.20829	18.45	1.25894	12.63	0.937478	15.66	1.0661	18.14	1.22207	11.49	1.23732	9.39	0.942314	APGSPASPPGSIE				0	0	0.99694	12.671	18	1.1003	12.25	18	1.212	18.449	18	1.0121	7.1549	12	1.1029	7.0514	12	1.2628	12.632	12	1.0661	18.138	17	1.1335	13.388
B0S7P1	Bromodomain containing 2;Bromodomain-containing protein 2;O27.1.1;Really interesting new gene 3 protein;Bromodomain containing 2, isoform CRA_a;Putative uncharacterized protein DKFZp313H139	BRD2;DAMA-214M2.2-005;BRD2;KIAA9001;RING3;BRD2;DKFZp313H139;hCG_17503	T657			0.95672	26.69	0.880622	27.31											0.662761	PKKATKTAPPAIP				n/a	n/a	0.95672	26.693	7	0.90738	25.042	7	0.92046	27.305	7
B0UZZ8	cDNA, FLJ96697;WD repeat domain 46;WD repeat domain 46, isoform CRA_d;WD repeat-containing protein 46;WD repeat-containing protein BING4	DADB-159G18.3-001;DAMC-227D19.9-001;hCG_17524;WDR46;BING4;C6orf11;FP221;WDR46	S41	1.06334	17.97	0.84507	22.685	0.615663	21.36	0.445022	38.13	1.07756	23.005	0.87817	20.325	0.629925	43.845	0.634913	19.705	0.99972	PTTAGASPGPPRN				2	0	0.89136	24.863	3	0.85094	8.1995	3	0.74293	2.3938	3										0.70984	34.535	3	0.85109	11.538
B1AKJ5	Nardilysin (N-arginine dibasic convertase);Nardilysin (N-arginine dibasic convertase), isoform CRA_d;Nardilysin;N-arginine dibasic convertase	hCG_40292;NRD1;RP4-657D16.2-002;NRD1	S94	0.861026	87.19	0.99991	19.81	0.864412	57.19	0.985511	21.02	0.734981	84.81	0.64779	22.31	0.955685	21.15	0.801122	16.79	0.999935	EEGRRGSISNAGD		GO:0004222;GO:0008270	GO:0006508	0	0	0.99991	19.807	35	0.78893	22.317	35	0.86449	57.19	35	1.1613	87.188	37	1.1584	86.205	37	0.9856	21.017	37	0.64779	22.312	25	1.0023	17.844
B1AL17	Family with sequence similarity 178, member A;Protein FAM178A	FAM178A;RP11-108L7.12-002;C10orf6;FAM178A	S710	1.09153	24.71	1.1746	21.44	1.06665	21.62	0.918455	42.63	1.36101	7.55	1.2887	18.07	1.13297	19.37	1.03343	9.74	1	RIGEEDSTDDEDG				0	0	1.1746	21.443	10	1.1812	16.27	10	0.9081	21.617	10	1.0761	24.706	2	1.0854	26.88	2	0.78193	42.63	2	1.2887	18.065	8	1.1631	16.074
B1AL17	Family with sequence similarity 178, member A;Protein FAM178A	FAM178A;RP11-108L7.12-002;C10orf6;FAM178A	T711	1.09153	24.71	1.1746	21.44	1.06665	21.62	0.918455	42.63	1.36101	7.55	1.2887	18.07	1.13297	19.37	1.03343	9.74	1	IGEEDSTDDEDGI				0	0	1.1746	21.443	10	1.1812	16.27	10	0.9081	21.617	10	1.0761	24.706	2	1.0854	26.88	2	0.78193	42.63	2	1.2887	18.065	8	1.1631	16.074
B1ALM5	Transmembrane protein 9;Dermal papilla-derived protein 4;Transmembrane protein 9	RP5-894H24.1-001;TMEM9;DERP4;HSPC186;PSEC0012;TMEM9;UNQ631/PRO1248	S140	2.09525	8.56	1.2156		2.09193		1.11795	80.66									1	ENEDARSMAAAAA	GO:0016021			8	n/a
B1Q2X3	TAF1 RNA polymerase II, TATA box binding protein (TBP)-associated factor, neuron specific isoform;Cell cycle gene 1 protein;TBP-associated factor 250 kDa;Transcription initiation factor TFIID 250 kDa subunit;Transcription initiation factor TFIID subunit 1	N-TAF1;BA2R;CCG1;CCGS;TAF1;TAF2A	S543																	0.261678	EKEEATSNSPSKE	GO:0005669	GO:0003677	GO:0006355;GO:0006352	n/a	n/a
B1Q2X3	TAF1 RNA polymerase II, TATA box binding protein (TBP)-associated factor, neuron specific isoform;Cell cycle gene 1 protein;TBP-associated factor 250 kDa;Transcription initiation factor TFIID 250 kDa subunit;Transcription initiation factor TFIID subunit 1	N-TAF1;BA2R;CCG1;CCGS;TAF1;TAF2A	T542																	0.261678	DEKEEATSNSPSK	GO:0005669	GO:0003677	GO:0006355;GO:0006352	n/a	n/a
B2RUZ4	Uncharacterized protein LOC388588		S22			1.0331	16.18	0.858661	15.18			1.24458	9.45	1.1195	20.95	1.08363	21.3	1.21802	11.72	1	GSRDGVSIGAVSS	GO:0016021			n/a	0	1.0331	16.18	4	0.8829	22.888	4	0.83115	15.175	4										1.1195	20.951	9	1.1182	13.236
B2RUZ4	Uncharacterized protein LOC388588		S28			1.0331	16.18	0.858661	15.18			1.15867		1.0325	25.78	0.952419	20.78	1.04458		0.622622	SIGAVSSTEEASR	GO:0016021			n/a	0	1.0331	16.18	4	0.8829	22.888	4	0.83115	15.175	4										1.0325	25.78	6	1.0459	10.767
B3KTC7	cDNA FLJ38069 fis, clone CTONG2015434, highly similar to DOUBLE-STRAND BREAK REPAIR PROTEIN MRE11A;Double-strand break repair protein MRE11A;Meiotic recombination 11 homolog 1;Meiotic recombination 11 homolog A	HNGS1;MRE11;MRE11A	S691									0.881279	8.42	0.985755	5.85	0.81795	9.11	0.963063	9.08	1	KGVDFESSEDDDD	GO:0005634	GO:0004519;GO:0004527;GO:0030145	GO:0006302;GO:0007126	n/a	0										0.92304	33.198	6	0.72691	19.124	6	0.67491	14.823	6	0.94731	5.851	6	0.91336	5.6705
B3KTC7	cDNA FLJ38069 fis, clone CTONG2015434, highly similar to DOUBLE-STRAND BREAK REPAIR PROTEIN MRE11A;Double-strand break repair protein MRE11A;Meiotic recombination 11 homolog 1;Meiotic recombination 11 homolog A	HNGS1;MRE11;MRE11A	S692									0.881279	8.42	0.985755	5.85	0.81795	9.11	0.963063	9.08	1	GVDFESSEDDDDD	GO:0005634	GO:0004519;GO:0004527;GO:0030145	GO:0006302;GO:0007126	n/a	0										0.92304	33.198	6	0.72691	19.124	6	0.67491	14.823	6	0.94731	5.851	6	0.91336	5.6705
B4DDH6	cDNA FLJ57025, highly similar to Ceroid-lipofuscinosis neuronal protein 6;Ceroid-lipofuscinosis neuronal protein 6	CLN6	S63	1.41578	42.495	1.11866	42.655	1.29133	31.8	1.30631	7.745	0.800076	67.11	0.809285	110.405	0.590754	89.925	0.596415	47.33	0.99997	KGKKHGSVSADEA				0	0	1.2795	41.618	27	1.3363	28.192	27	1.115	49.275	27	1.3392	6.2427	16	1.6157	24.588	16	1.3366	10.602	16	1.187	94.983	12	1.0473	136.27
B4DI41	cDNA FLJ55972, highly similar to Methyl-CpG-binding domain protein 1;cDNA FLJ60940, highly similar to Methyl-CpG-binding domain protein 1;CXXC-type zinc finger protein 3;Methyl-CpG-binding domain protein 1;Methyl-CpG-binding protein MBD1;Protein containing methyl-CpG-binding domain 1	CXXC3;MBD1;PCM1	S348									1.14194		0.85088	1.62	0.749617	8.29	0.561811		0.999474	PPPPSQSPEPTEP	GO:0005634	GO:0003677;GO:0008270		n/a	0										0.58641	15.196	7	0.69702	11.709	7	1	9.5177	7	0.85088	1.6189	2	0.65733	6.4772
B4DI41	cDNA FLJ55972, highly similar to Methyl-CpG-binding domain protein 1;cDNA FLJ60940, highly similar to Methyl-CpG-binding domain protein 1;CXXC-type zinc finger protein 3;Methyl-CpG-binding domain protein 1;Methyl-CpG-binding protein MBD1;Protein containing methyl-CpG-binding domain 1	CXXC3;MBD1;PCM1	S439																	0.497268	MKRIIPSVWSESE	GO:0005634	GO:0003677;GO:0008270		n/a	n/a
B4DI41	cDNA FLJ55972, highly similar to Methyl-CpG-binding domain protein 1;cDNA FLJ60940, highly similar to Methyl-CpG-binding domain protein 1;CXXC-type zinc finger protein 3;Methyl-CpG-binding domain protein 1;Methyl-CpG-binding protein MBD1;Protein containing methyl-CpG-binding domain 1	CXXC3;MBD1;PCM1	S442																	0.497268	IIPSVWSESEDGA	GO:0005634	GO:0003677;GO:0008270		n/a	n/a
B4DI41	cDNA FLJ55972, highly similar to Methyl-CpG-binding domain protein 1;cDNA FLJ60940, highly similar to Methyl-CpG-binding domain protein 1;CXXC-type zinc finger protein 3;Methyl-CpG-binding domain protein 1;Methyl-CpG-binding protein MBD1;Protein containing methyl-CpG-binding domain 1	CXXC3;MBD1;PCM1	S450																	0.996738	SEDGAGSPPPYRR	GO:0005634	GO:0003677;GO:0008270		n/a	n/a
B4DJR7	cDNA FLJ56317, highly similar to Zinc finger protein 691;HCG23158, isoform CRA_a;Zinc finger protein 691;Zinc finger protein 691;Zinc finger protein 691	hCG_23158;ZNF691;RP11-342M1.5-005;ZNF691;RP11-342M1.5-006;ZNF691	S77			1.1226		1.23744												0.960525	HGQESISDEIQET				n/a	n/a	1.1226		1	0.91579		1	1.1023		1
B4DKT0	cDNA FLJ59712, highly similar to Golgi reassembly-stacking protein 2;Golgi phosphoprotein 6;Golgi reassembly-stacking protein 2;Golgi reassembly-stacking protein of 55 kDa;p59;cDNA FLJ54595, highly similar to Golgi reassembly-stacking protein 2	GOLPH6;GORASP2	S463			0.8236	3.2	0.239157	182.87			1.03859	21.82	0.80706	13.93	0.722141	9.81	0.739089	30.64	0.957017	DANASESP_____	GO:0005794			n/a	0	0.8236	3.199	2	0.62318	21.409	2	0.29038	182.87	2										0.80706	13.927	6	0.74922	20.454
B4DKT0	cDNA FLJ59712, highly similar to Golgi reassembly-stacking protein 2;Golgi phosphoprotein 6;Golgi reassembly-stacking protein 2;Golgi reassembly-stacking protein of 55 kDa;p59;cDNA FLJ54595, highly similar to Golgi reassembly-stacking protein 2	GOLPH6;GORASP2	T234	0.896426	7.37	0.65154	5.01	0.462463	70.41	0.703728	28.39	0.73817	18.82	0.602	6.16	0.989568	0.87	0.792112	20.23	0.999797	PGQMAGTPITPIK	GO:0005794			1	0
B4DKT0	cDNA FLJ59712, highly similar to Golgi reassembly-stacking protein 2;Golgi phosphoprotein 6;Golgi reassembly-stacking protein 2;Golgi reassembly-stacking protein of 55 kDa;p59;cDNA FLJ54595, highly similar to Golgi reassembly-stacking protein 2	GOLPH6;GORASP2	T427			0.94688	7.03	1.39892	4.85											0.989274	SITVDVTPPTAKA	GO:0005794			n/a	n/a
B4DMU0	Pyrroline-5-carboxylate reductase;Pyrroline-5-carboxylate reductase 1, mitochondrial	PYCR1	S328			0.72173	2.53	0.923165	2.99			1.00781		0.9198	41.51	0.897798	38.36	1.12887		0.985159	PAGTAISPSGHTK		GO:0000166;GO:0016616;GO:0004735	GO:0006561	n/a	0	0.72173	2.5263	2	1.1846	6.3144	2	1.2791	2.9936	2										0.9198	41.506	6	1.0488	36.887
B4DN33	cDNA FLJ51253, moderately similar to Homo sapiens transmembrane protein 35 (TMEM35), mRNA		S61			0.13438	115.47	0.734629	94.48											1	KKMGINSIIHQIV	GO:0016021			n/a	n/a
B4DQI6	cDNA FLJ50614, highly similar to Transformer-2 protein homolog		S158	0.915964	16.64	1.0649	7.96	1.09924	16.77	0.871291	30.745	0.987771	11.005	1.04274	9.89	0.97907	25.92	1.10181	18.995	1	DYRYRRSPSPYYS		GO:0003676;GO:0000166		0	0	1.0705	12.399	19	1.0641	18.54	19	1.0801	12.495	19	1.0603	8.7011	11	1.043	7.451	11	0.98454	12.116	11	1.0895	13.005	5	1.1849	13.928
B4DQI6	cDNA FLJ50614, highly similar to Transformer-2 protein homolog		S160	1.08482	16.01	1.0489	14.77	1.07333	23.905	0.768036	25.93	2.03079		0.812115	19.46	0.635504	19.13	0.549075		1	RYRRSPSPYYSRY		GO:0003676;GO:0000166		0	8	1.0385	26.022	28	1.0941	22.453	28	1.0622	26.766	28	1.0773	16.005	16	1.0479	21.819	16	0.95003	25.929	16	1.0799	19.463	6	1.1345	14.642
B4DR52	Histone H2B;Histone H2B;HIRA-interacting protein 1;Histone H2B type 1-K;HIRA-interacting protein 2;Histone H2B type 1-D;Histone H2B.1 B;Histone H2B.b;Histone H2B type 1-C/E/F/G/I;Histone H2B.1 A;Histone H2B.a;Histone H2B.g;Histone H2B.h;Histone H2B.k;Histone H2B.l;Histone H2B type 2-F;Histone H2B type 1-H;Histone H2B.j;Histone H2B type 1-N;Histone H2B.d;Histone H2B type 1-M;Histone H2B.e;Histone …	H2BFT;HIRIP1;HIST1H2BK;H2BFB;HIRIP2;HIST1H2BD;H2BFA;H2BFG;H2BFH;H2BFK;H2BFL;HIST1H2BC;HIST1H2BE;HIST1H2BF;HIST1H2BG;HIST1H2BI;HIST2H2BF;H2BFJ;HIST1H2BH;H2BFD;HIST1H2BN;H2BFE;HIST1H2BM;H2BFS;H2BFC;HIST1H2BL	S37	1.09693	16.7	1.4463	16.89	1.32185	52.12	1.68812	21.61	0.980222	18.17	1.1201	18.33	1.22942	19.36	1.01894	8.98	0.995688	KRSRKESYSVYVY	GO:0000786;GO:0005634	GO:0003677	GO:0006334	0	0	1.4463	16.892	10	1.5079	18.194	10	0.91395	52.118	10	1.3185	16.702	13	1.526	31.066	13	1.1672	21.607	13	1.1201	18.331	16	1.1037	23.292
B4DRY3	cDNA FLJ52228, highly similar to Mps one binder kinase activator-like 1A;Mob1 homolog 1A;Mob1B;Mps one binder kinase activator-like 1A;Protein Mob4A;Mob1 alpha;Mob1 homolog 1B;Mps one binder kinase activator-like 1B;Protein Mob4B	MOB4A;MOBKL1A;C2orf6;MOB4B;MOBK1B;MOBKL1B	T40																	0.978611	IKHAEATIGSGNI		GO:0016301		n/a	n/a
B4DST0	cDNA FLJ57812, highly similar to Histone-lysine N-methyltransferase, H3 lysine-9 specific 1 (EC 2.1.1.43);Suppressor of variegation 3-9 homolog 1 (Drosophila), isoform CRA_b;Histone H3-K9 methyltransferase 1;Histone-lysine N-methyltransferase SUV39H1;Lysine N-methyltransferase 1A;Position-effect variegation 3-9 homolog;Suppressor of variegation 3-9 homolog 1	hCG_19814;SUV39H1;KMT1A;SUV39H;SUV39H1	S402	1.12461	44.86	1.25135	19.965	1.12722	32.57	1.44681	16.15	1.12093	25.11	1.2129	14.5	1.11757	10.97	1.22556	13.1	1	IAGIPGSPKKRVR	GO:0005694;GO:0005634	GO:0018024;GO:0008270		0	0	1.1483	2.2862	2	1.1534	35.554	2	0.85897	11.378	2
B4DT31	cDNA FLJ53425, highly similar to Far upstream element-binding protein 1;DNA helicase V;Far upstream element-binding protein 1;cDNA FLJ61021, highly similar to Far upstream element-binding protein 1	FUBP1	S651																	0.908012	AYYAQTSPQGMPQ	GO:0005634	GO:0003723		n/a	n/a
B4DT31	cDNA FLJ53425, highly similar to Far upstream element-binding protein 1;DNA helicase V;Far upstream element-binding protein 1;cDNA FLJ61021, highly similar to Far upstream element-binding protein 1	FUBP1	T650																	0.498663	AAYYAQTSPQGMP	GO:0005634	GO:0003723		n/a	n/a
B4DY08	cDNA FLJ53542, highly similar to Heterogeneous nuclear ribonucleoproteins C		S247	1.16351	22.545	1.04235	8.395	0.97049	19.84	0.744806	51.73	1.01075	17.145	0.965415	11.6	0.770058	17.105	0.820506	18.415	1	EGGADDSAEEGDI	GO:0030529	GO:0003676;GO:0000166		0	0	1.0429	8.8959	19	0.76072	8.866	19	0.73252	12.333	19	1.0216	4.404	4	0.70506	19.124	4	0.75547	30.545	4	1.0214	11.489	8	0.75279	14.782
B4DYX9	cDNA FLJ56180, highly similar to Negative elongation factor E;Negative elongation factor E;RNA-binding protein RD;cDNA FLJ52247, highly similar to Negative elongation factor E;RD RNA binding protein;RD RNA binding protein;RD RNA binding protein	NELFE;RD;RDBP;DADB-122G4.4-007;DAMC-178C20.5-007;DAQB-331I12.3-007;DASS-107J21.4-007;RDBP;XXbac-BCX116I9.1-007;XXbac-BPG116M5.4-007;DADB-122G4.4-011;DAMC-178C20.5-011;DAQB-331I12.3-011;DASS-107J21.4-011;RDBP;XXbac-BCX116I9.1-011;XXbac-BPG116M5.4-011;DADB-122G4.4-010;DAMC-178C20.5-010;DAQB-331I12.3-010;DASS-107J21.4-010;RDBP;XXbac-BCX116I9.1-010;XXbac-BPG116M5.4-010	S186			0.94155	0.46	1.01574	3.46											0.494644	RSGAHSSASPPRS	GO:0005739;GO:0005634	GO:0000166;GO:0003746		n/a	n/a	0.94155	0.45709	2	0.92045	5.2013	2	1.0788	3.463	2
B4DYX9	cDNA FLJ56180, highly similar to Negative elongation factor E;Negative elongation factor E;RNA-binding protein RD;cDNA FLJ52247, highly similar to Negative elongation factor E;RD RNA binding protein;RD RNA binding protein;RD RNA binding protein	NELFE;RD;RDBP;DADB-122G4.4-007;DAMC-178C20.5-007;DAQB-331I12.3-007;DASS-107J21.4-007;RDBP;XXbac-BCX116I9.1-007;XXbac-BPG116M5.4-007;DADB-122G4.4-011;DAMC-178C20.5-011;DAQB-331I12.3-011;DASS-107J21.4-011;RDBP;XXbac-BCX116I9.1-011;XXbac-BPG116M5.4-011;DADB-122G4.4-010;DAMC-178C20.5-010;DAQB-331I12.3-010;DASS-107J21.4-010;RDBP;XXbac-BCX116I9.1-010;XXbac-BPG116M5.4-010	S188	0.903565	15.63	0.92001	17.79	0.876218	20.98	1.05157	11.4	0.746462	12.85	0.88508	20.45	0.998193	24.39	1.08006	6.48	0.98424	GAHSSASPPRSRS	GO:0005739;GO:0005634	GO:0000166;GO:0003746		0	0	0.92001	17.788	15	0.77389	21.557	15	0.9524	20.976	15	1.0182	15.627	8	0.95208	5.9013	8	1.143	11.399	8	0.88508	20.452	9	0.94746	59.79
B4DZN8	cDNA FLJ50739;Uncharacterized protein C16orf55	C16orf55	S95																	0.869288	IIITRASNETIVS				n/a	n/a
B4E0Y9	cDNA FLJ54528, highly similar to Serine/threonine-protein kinase MST4 (EC 2.7.11.1);cDNA, FLJ79036, highly similar to Serine/threonine-protein kinase MST4 (EC 2.7.11.1);Mammalian STE20-like protein kinase 4;Mst3 and SOK1-related kinase;Serine/threonine-protein kinase MASK;Serine/threonine-protein kinase MST4;STE20-like kinase MST4;cDNA FLJ90669 fis, clone PLACE1005519, moderately similar to Homo …	MASK;MST4;STK3;STK3	S322	0.761513	27.26	1.0087	24.12	0.704365	11.39	0.7571	36.26	0.722068	5.48	0.9649		1.39168		0.955039	15.34	1	WKAEGHSDDESDS		GO:0005524;GO:0004672		0	0	1.0087	24.119	4	0.72804	9.0665	4	0.69829	11.391	4	1.3246	27.257	7	1.0881	23.893	7	0.75057	36.259	7	0.9649		1	1.4282
B4E0Y9	cDNA FLJ54528, highly similar to Serine/threonine-protein kinase MST4 (EC 2.7.11.1);cDNA, FLJ79036, highly similar to Serine/threonine-protein kinase MST4 (EC 2.7.11.1);Mammalian STE20-like protein kinase 4;Mst3 and SOK1-related kinase;Serine/threonine-protein kinase MASK;Serine/threonine-protein kinase MST4;STE20-like kinase MST4;cDNA FLJ90669 fis, clone PLACE1005519, moderately similar to Homo …	MASK;MST4;STK3;STK3	S326	0.920687	4.41	1.1469	7.72	0.974395	16.73	0.887964	12.24	0.58334	6.24	0.7759	28.16	0.728857	16.88	0.737477	17.85	0.999978	GHSDDESDSEGSD		GO:0005524;GO:0004672		0	0	1.1469	7.7151	3	0.88625	25.887	3	0.84959	16.733	3	1.2457	4.4144	2	1.1044	13.228	2	0.77423	12.244	2	0.7759	28.155	2	0.78289	51.042
B4E0Y9	cDNA FLJ54528, highly similar to Serine/threonine-protein kinase MST4 (EC 2.7.11.1);cDNA, FLJ79036, highly similar to Serine/threonine-protein kinase MST4 (EC 2.7.11.1);Mammalian STE20-like protein kinase 4;Mst3 and SOK1-related kinase;Serine/threonine-protein kinase MASK;Serine/threonine-protein kinase MST4;STE20-like kinase MST4;cDNA FLJ90669 fis, clone PLACE1005519, moderately similar to Homo …	MASK;MST4;STK3;STK3	S328	0.982842	34.73	1.0597	9.35	0.712023	74.86	0.864005	26.69	1.05495		1.0134	14.15	1.16024	21.9	0.684825		0.936858	SDDESDSEGSDSE		GO:0005524;GO:0004672		0	0	1.0597	9.3512	2	0.78204	48.744	2	0.67191	74.86	2	1.0782	34.73	5	0.8964	17.282	5	0.81533	26.691	5	1.0134	14.149	6	1.0432	12.444
B4E0Y9	cDNA FLJ54528, highly similar to Serine/threonine-protein kinase MST4 (EC 2.7.11.1);cDNA, FLJ79036, highly similar to Serine/threonine-protein kinase MST4 (EC 2.7.11.1);Mammalian STE20-like protein kinase 4;Mst3 and SOK1-related kinase;Serine/threonine-protein kinase MASK;Serine/threonine-protein kinase MST4;STE20-like kinase MST4;cDNA FLJ90669 fis, clone PLACE1005519, moderately similar to Homo …	MASK;MST4;STK3;STK3	S331	1.29274	80.43	1.1006	9.85	0.647274	29.71	1.04424	8.02	0.743344	2.5	0.99333	15.42	1.19239	17.94	1.02392	1.56	0.551375	ESDSEGSDSESTS		GO:0005524;GO:0004672		0	0	1.1006	9.8526	3	0.8103	10.52	3	0.58811	29.714	3	0.85137	80.43	3	0.60752	19.671	3	0.94879	8.0203	3	0.99333	15.418	10	1.1965	17.563
B4E2P2	cDNA FLJ52061, highly similar to Translocon-associated protein subunit gamma;Signal sequence receptor subunit gamma;Translocon-associated protein subunit gamma;Putative uncharacterized protein SSR3;Putative uncharacterized protein SSR3	SSR3;TRAPG;SSR3;SSR3	S105	0.960951	23.26	1.0631	30.16	1.29613	45.59	1.30612	52.39	1.20038	21.6	1.0293	40.55	0.654573	87.09	1.26429	23.88	1	EVTRKISEADNRK	GO:0030176;GO:0005784		GO:0006613	0	0	1.0631	30.155	26	1.3251	51.86	26	1.2192	45.587	25	1.1063	23.256	29	1.6036	21.984	29	1.2286	52.386	30	1.0293	40.554	25	1.2235	49.438
B4E2Q6	cDNA FLJ54323		S914	1.08844	7.96	1.3439	32.4	1.29313	34.97	1.80392	45.94			1.4554	19.12	1.68535	70.77			0.999212	PCRSHGSPTHVRR				0	n/a	1.3439	32.395	4	1.2744	18.722	4	0.96222	34.973	4	1.2347	7.9567	3	1.4222	4.9015	3	1.3423	45.941	3	1.4554	19.115	5	1.5476	22.481
B5MBX0	Putative uncharacterized protein CDCA5;Cell division cycle-associated protein 5;p35;Sororin	CDCA5;CDCA5	S21	1.07363	96.795	1.18245	23.93	1.01624	32.835	1.3114	45.585	1.42873	12.64	1.255	19.62	1.12556	26.27	1.27345	11.06	0.999555	SGPRAPSPTKPIR	GO:0005634;GO:0005886			0	0	1.2197	14.955	43	1.3983	14.955	43	1.1168	18.671	43	1.2637	10.902	20	1.2758	11.481	20	1.1418	11.214	20	1.255	19.62	27	1.1544	20.028
B5MBX0	Putative uncharacterized protein CDCA5;Cell division cycle-associated protein 5;p35;Sororin	CDCA5;CDCA5	S75	1.0112	23.44	1.0928	21.285	1.35616	23.37	1.15039	22.12	0.858039	10.92	1.02999	12.145	1.26323	13.695	1.10001	10.24	1	EVPAVQSPRRSPR	GO:0005634;GO:0005886			0	0	1.0117	24.42	20	1.45	31.71	20	1.2145	28.295	20	1.0402	20.505	4	1.452	40.535	4	1.2167	27.679	4	1.0604	10.58	6	1.1735	11.882
B5MBZ0	Putative uncharacterized protein EML4;Echinoderm microtubule-associated protein-like 4;Restrictedly overexpressed proliferation-associated protein;Ropp 120	EML4;C2orf2;EMAPL4;EML4	S146	1.41573	15.46	1.07741	16.35	0.653296	20.87	0.863656	23.77	0.636204	11.05	0.857825	24.195	1.00337	17.46	0.681967	11.21	0.953432	QIRASPSPQPSSQ				0	0	0.87583	16.346	9	0.63092	14.44	9	0.77144	20.872	9	0.76103	15.456	3	0.65271	23.774	3	0.8016	23.765	3	0.73246	32.651	6	0.89559	18.71
B5MC40	Putative uncharacterized protein GATAD2A;GATA zinc finger domain-containing protein 2A;Transcriptional repressor p66-alpha;Putative uncharacterized protein GATAD2A;Putative uncharacterized protein GATAD2A;Putative uncharacterized protein GATAD2A;Putative uncharacterized protein GATAD2A	GATAD2A;GATAD2A;GATAD2A;GATAD2A;GATAD2A;GATAD2A	S119	1.00671	19.26	0.87029	10.055	0.951488	17.96	0.882213	23.3	0.81558	7.29	0.678355	31.17	0.649423	31.245	0.645685	21.745	1	SERRPPSPDVIVI	GO:0005634	GO:0043565;GO:0003700;GO:0008270		0	0	0.91452	17.862	19	1	16.895	19	1.0976	15.56	19	0.86449	19.261	43	0.85114	28.843	43	1.0137	23.302	43	0.8801	31.34	35	0.81763	25.983
B5MC40	Putative uncharacterized protein GATAD2A;GATA zinc finger domain-containing protein 2A;Transcriptional repressor p66-alpha;Putative uncharacterized protein GATAD2A;Putative uncharacterized protein GATAD2A;Putative uncharacterized protein GATAD2A;Putative uncharacterized protein GATAD2A	GATAD2A;GATAD2A;GATAD2A;GATAD2A;GATAD2A;GATAD2A	S126	1.05261	16.86	0.87349	14.98	0.867445	15.185	0.747716	18.1	0.948745	6.8	0.790755	22.515	0.751209	30.985	0.730559	17.95	0.999993	PDVIVISDNEQPS	GO:0005634	GO:0043565;GO:0003700;GO:0008270		0	0	0.92092	27.712	7	0.92737	22.17	7	0.89716	10.006	7	0.82983	16.861	14	0.74263	20.094	14	0.85601	18.102	14	1.1049	14.033	10	0.95786	24.58
B5MC40	Putative uncharacterized protein GATAD2A;GATA zinc finger domain-containing protein 2A;Transcriptional repressor p66-alpha;Putative uncharacterized protein GATAD2A;Putative uncharacterized protein GATAD2A;Putative uncharacterized protein GATAD2A;Putative uncharacterized protein GATAD2A	GATAD2A;GATAD2A;GATAD2A;GATAD2A;GATAD2A;GATAD2A	S132	0.839458		0.774685		0.82246		0.821786		0.915582	38.53	0.76105	7.17	0.81123	7.26	0.71442	35.61	0.574004	SDNEQPSSPRVNG	GO:0005634	GO:0043565;GO:0003700;GO:0008270		0	0	0.73637		1	0.95273		1	1.1803		1	0.92284		1	0.94227		1	1.0608		1	0.89654	7.1666	2	0.91132	0.86995
B5MC40	Putative uncharacterized protein GATAD2A;GATA zinc finger domain-containing protein 2A;Transcriptional repressor p66-alpha;Putative uncharacterized protein GATAD2A;Putative uncharacterized protein GATAD2A;Putative uncharacterized protein GATAD2A;Putative uncharacterized protein GATAD2A	GATAD2A;GATAD2A;GATAD2A;GATAD2A;GATAD2A;GATAD2A	S133	0.969818	23.44	0.891185	8.66	1.0712	14.68	1.02575	30.55	0.751066	7.775	0.62251	31.975	0.501357	34.425	0.602148	23.895	0.974656	DNEQPSSPRVNGI	GO:0005634	GO:0043565;GO:0003700;GO:0008270		0	0	0.94305	8.6593	9	1.0086	15.436	9	1.1463	14.683	9	0.91892	23.437	16	1.011	37.437	16	1.151	30.549	16	0.84422	39.45	17	0.80513	29.464
B5MC40	Putative uncharacterized protein GATAD2A;GATA zinc finger domain-containing protein 2A;Transcriptional repressor p66-alpha	GATAD2A;GATAD2A	T208	1.07954	12.865	0.86547	26.1	0.796055	65.715	0.736498	35.84	1.22603	21.665	1.0676	13.205	0.925508	26.065	1.17094	23.285	0.854085	VGSTVTTPPPIVR	GO:0005634	GO:0043565;GO:0003700;GO:0008270		0	0	0.83763	36.239	16	0.86922	41.82	16	0.91511	61.289	16	0.72453	8.3196	2	0.65547	20.874	2	0.79232	50.233	2	1.1622	14.411	6	1.0721	23.744
B5MC40	Putative uncharacterized protein GATAD2A;GATA zinc finger domain-containing protein 2A;Transcriptional repressor p66-alpha;Putative uncharacterized protein GATAD2A;Putative uncharacterized protein GATAD2A;Putative uncharacterized protein GATAD2A;Putative uncharacterized protein GATAD2A;Putative uncharacterized protein GATAD2A	GATAD2A;GATAD2A;GATAD2A;GATAD2A;GATAD2A;GATAD2A;GATAD2A	T68	1.0113	10.35	0.94044	15.68	0.863079	9.02	1.01464	24.78	1.25864	11.19	0.93751	9.09	1.03604	31.9	1.14845	17.41	0.999999	DGDMRVTPEPGAG	GO:0005634	GO:0043565;GO:0003700;GO:0008270		0	0
B5MCU0	Putative uncharacterized protein R3HDM2;R3H domain-containing protein 1;Putative uncharacterized protein R3HDM1;cAMP-regulated phosphoprotein 21;Thymocyte cAMP-regulated phosphoprotein	R3HDM2;KIAA0029;R3HDM;R3HDM1;R3HDM1;ARPP21;TARPP	S283	1.58366	55.08	0.93588	24.52	0.827468	124.75	0.982487	106.87	1.17276	56.88	0.74448	45.18	0.719451	33.36	0.585943	10.36	0.98097	DGRRSKSIEEREE		GO:0003676		0	0	0.93588	24.523	7	0.67682	25.93	7	0.88416	124.75	7	0.59096	55.079	5	0.85284	36.245	5	1.0498	106.87	5	0.74448	45.177	13	1.0038	24.926
B5MEC5	Putative uncharacterized protein SLC38A1;Amino acid transporter A1;N-system amino acid transporter 2;Sodium-coupled neutral amino acid transporter 1;Solute carrier family 38 member 1;System A amino acid transporter 1;System N amino acid transporter 1	SLC38A1;ATA1;NAT2;SAT1;SLC38A1;SNAT1	T54	0.887479	28.855	1.0908	80.49	1.45251	43.53	1.13709	21.115	0.716965	10.305	0.809095	60.47	0.776711	12.29	1.02031	6.76	0.972767	ESRRSITNSHIEK	GO:0016021			0	0	1.0908	80.489	17	1.2066	88.25	17	1.3316	43.53	17	1.0392	52.192	15	1.2326	25.925	15	1.1146	33.334	15	1.1514	21.808	13	1.0385	20.007
B5TJY2	KINDLIN2 isoform 2;Fermitin family homolog 2;Kindlin-2;Mitogen-inducible gene 2 protein;Pleckstrin homology domain-containing family C member 1	FERMT2;FERMT2;KIND2;MIG2;PLEKHC1	S159	1.01964	23.38	1.0116	11.75	0.638492	9.49	0.766621	14.37			1.0548		1.04081				0.998402	KKIDDQSEDEAIE				0	n/a	1.0116	11.747	7	0.6547	11.514	7	0.63117	9.4889	7	0.99211	23.379	10	0.70047	10.769	10	0.75783	14.369	10	1.0548		1	0.94294
B7WP27	Putative uncharacterized protein CWC22;fSAPb;Nucampholin homolog;Pre-mRNA-splicing factor CWC22 homolog;Putative uncharacterized protein CWC22	CWC22;CWC22;KIAA1604;NCM;CWC22	S27	1.3891		1.2724		1.00759		1.12299		1.02997	5.15	1.0289	1.39	0.994504	0.37	0.939036	13.12	0.836337	NSYQRNSSPEDRY	GO:0005737;GO:0005634	GO:0005488	GO:0016070	0	0	1.2724		1	0.93422		1	0.79188		1	0.91599		1	0.74748		1	0.88258		1	1.0289	1.3882	3	0.97304	4.1873
B7WP27	Putative uncharacterized protein CWC22;fSAPb;Nucampholin homolog;Pre-mRNA-splicing factor CWC22 homolog;Putative uncharacterized protein CWC22	CWC22;CWC22;KIAA1604;NCM;CWC22	S39	1.35665	50.39	0.85245	30.98	1.02788	31.86	0.728436	17.32	1.90187	14.01	1.0663	21.85	0.949583	26.34	0.631378	25.01	0.999995	YEEQERSPRDRDY	GO:0005737;GO:0005634	GO:0005488	GO:0016070	0	0	0.85245	30.978	17	0.98706	23.793	17	1.2058	31.864	17	0.62835	50.387	3	0.7751	32.515	3	0.85452	17.324	3	1.0663	21.85	8	0.96632	24.581
B7WP27	Putative uncharacterized protein CWC22;fSAPb;Nucampholin homolog;Pre-mRNA-splicing factor CWC22 homolog	CWC22;CWC22;KIAA1604;NCM	S829	1.04956	48.035	1.1489	18.415	0.80581	94.37	0.592321	117.465	1.46602	75.485	1.1105	17.035	0.888472	62.78	0.633896	44.62	0.999987	RGERRNSFSENEK	GO:0005737;GO:0005634	GO:0005488	GO:0016070	0	0	1.1839	26.141	14	1.0982	11.353	14	0.71511	51.45	14	1.1227	12.296	18	1.0273	9.4987	18	0.82686	26.232	18	1.1907	18.592	25	0.97886	88.642
B7WP27	Putative uncharacterized protein CWC22;fSAPb;Nucampholin homolog;Pre-mRNA-splicing factor CWC22 homolog	CWC22;CWC22;KIAA1604;NCM	S866	0.874899	31.19	0.91147	36.14	0.684842	23.18	0.644911	15.23			1.1825	41.46	0.917797	42.52			1	KHSGSRSDEDRYQ	GO:0005737;GO:0005634	GO:0005488	GO:0016070	0	n/a	0.91147	36.144	2	0.35137	26.739	2	0.75136	23.178	2	1.0418	31.19	3	0.75475	12.576	3	0.70755	15.232	3	1.1825	41.455	4	0.91767	43.292
B7Z4N5	cDNA FLJ58676, highly similar to Protein AF-9;ALL1-fused gene from chromosome 9 protein;Myeloid/lymphoid or mixed-lineage leukemia translocated to chromosome 3 protein;Protein AF-9;YEATS domain-containing protein 3;cDNA FLJ53222, highly similar to Protein AF-9;Myeloid/lymphoid or mixed-lineage leukemia (Trithorax homolog, Drosophila); translocated to, 3;Myeloid/lymphoid or mixed-lineage leukemia …	AF9;MLLT3;YEATS3;MLLT3;RP11-15P13.2-002;hCG_1811108;MLLT3;RP11-15P13.2-006	S522	1.00788	33.01	1.1121	29.69	1.09721	26.47	1.08731	42.45	1.17191	33.46	1.2073	25.2	1.24618	24.3	1.16541	27.27	0.999997	QIIEVKSPIKQSK	GO:0005634		GO:0006355	0	0	1.1121	29.691	17	1.2359	33.712	17	0.98661	26.473	17	1.1034	33.005	5	1.4128	62.44	5	0.97771	42.447	5	1.2073	25.195	17	1.1568	15.371
B7Z5U5	cDNA FLJ61655, highly similar to Phosphorylated CTD-interacting factor 1;Phosphorylated CTD-interacting factor 1	C20orf67;PCIF1	S30			0.57205	26	0.607517	44.7			0.909752	33.97	0.71149		0.810031		0.797723	13	0.91258	NQSQPCSPKPIRI				n/a	0	0.57205	26.004	2	0.65989	19.845	2	1.062	44.699	2										0.71149		1	0.92799
B7Z5W1	cDNA FLJ54854, highly similar to Junctional adhesion molecule A;Junctional adhesion molecule 1;Junctional adhesion molecule A;Platelet adhesion molecule 1;Platelet F11 receptor;cDNA FLJ59609, highly similar to Junctional adhesion molecule A	F11R;JAM1;JCAM;UNQ264/PRO301	S288			0.82242	11.78	0.865844	23.49			0.548648	4	1.35025	12.94	1.45638	21.67	0.978486	3.74	0.999397	VIYSQPSARSEGE	GO:0016021			n/a	0	0.82242	11.782	3	0.69055	38.593	3	1.0528	23.489	3										1.3238	12.94	16	1.2438	15.587
B7Z5W1	cDNA FLJ54854, highly similar to Junctional adhesion molecule A;Junctional adhesion molecule 1;Junctional adhesion molecule A;Platelet adhesion molecule 1;Platelet F11 receptor;cDNA FLJ59609, highly similar to Junctional adhesion molecule A	F11R;JAM1;JCAM;UNQ264/PRO301	S291			0.82242	11.78	0.865844	23.49			0.963394	76.19	1.3238	12.94	1.34008	21.67	1.1953	24.36	0.999905	SQPSARSEGEFKQ	GO:0016021			n/a	0	0.82242	11.782	3	0.69055	38.593	3	1.0528	23.489	3										1.3238	12.94	16	1.2438	15.587
B7Z5Z2	cDNA FLJ61162, highly similar to Ras-related protein R-Ras2;Ras-like protein TC21;Ras-related protein R-Ras2;Teratocarcinoma oncogene;cDNA FLJ51083, highly similar to Ras-related protein R-Ras2;cDNA FLJ52173, highly similar to Ras-related protein R-Ras2	RRAS2;TC21	S192	1.10307	22.63	0.79477	55.31	0.797552	46.01	0.896421	40.97	1.18752	34.73	1.0266	22.02	1.11437	30.25	1.11017	36.22	0.999283	EQECPPSPEPTRK	GO:0016020	GO:0005525;GO:0003924	GO:0007264	0	0	0.79477	55.306	54	0.86363	57.579	54	1.0035	46.011	54	0.72051	22.626	26	0.82907	37.461	26	1.1279	40.971	26	1.0266	22.015	48	0.98662	24.99
B7Z6D8	cDNA FLJ59422, highly similar to GRAM domain-containing protein 3;cDNA, FLJ79187, highly similar to GRAM domain-containing protein 3;cDNA FLJ51759, highly similar to GRAM domain-containing protein 3;GRAM domain-containing protein 3;HCV NS3-transactivated protein 2;cDNA FLJ55291, highly similar to GRAM domain-containing protein 3;GRAM domain containing 3, isoform CRA_c;cDNA FLJ50440, highly simila…	GRAMD3;NS3TP2;GRAMD3;hCG_27577	S267	1.31844	20.44	0.86276	4.22	0.892525	23.09	0.797251	24.75	0.909429	16.85	0.65096	19.79	0.715535	29.97	0.607242	19.08	0.998139	DFNDEFSDIDGVV				0	0	0.86276	4.2205	5	0.94701	27.719	5	1.0345	23.094	5	0.65438	20.438	5	0.82181	27.971	5	0.92407	24.745	5	0.65096	19.79	6	0.9085	10.369
B7Z6F8	cDNA FLJ61629, highly similar to Clathrin interactor 1;Clathrin interactor 1;Clathrin-interacting protein localized in the trans-Golgi region;Enthoprotin;Epsin-4;Epsin-related protein	CLINT1;ENTH;EPN4;EPNR;KIAA0171	T284																	0.722439	TANPSKTIDIGAA				n/a	n/a
B7Z888	cDNA FLJ55884, highly similar to RNA-binding protein 16;CDC5L complex-associated protein 7;Putative RNA-binding protein 16;RNA-binding motif protein 16;SR-like CTD-associated factor 8	CCAP7;KIAA1116;RBM16;SCAF8	S683	0.940464	23.36	1.0094	12.645	0.924696	58.865	1.10105	52.47	0.73333	13.105	0.709225	5.3	0.779002	32.17	0.887276	29.91	0.981331	TVQTTQSPTPVEK	GO:0005634	GO:0003676;GO:0000166		0	0	1.0165	11.897	4	1.0863	2.0832	4	1.0921	10.69	4										0.59237		1	0.82378
B7Z8T0	cDNA FLJ56198, highly similar to Serine/threonine-protein kinase PCTAIRE-1 (EC 2.7.11.22);Cell division protein kinase 16;PCTAIRE-motif protein kinase 1;Serine/threonine-protein kinase PCTAIRE-1	CDK16;PCTK1	S208	0.882881	26.98	1.13	56.68	0.758433	83.59	1.08677	48.32			0.85054	51.24	0.577959	49.52			0.795992	HPPRKISTEDINK		GO:0005524;GO:0004674		0	n/a	1.13	56.681	18	1.0316	31.348	18	0.67118	83.59	18	1.2799	26.98	23	1.253	43.725	23	0.96174	48.324	23	0.85054	51.243	2	0.63517	143.3
B7Z8T0	cDNA FLJ75213;PCTAIRE protein kinase 2, isoform CRA_b;Cell division protein kinase 17;PCTAIRE-motif protein kinase 2;Serine/threonine-protein kinase PCTAIRE-2;cDNA FLJ56198, highly similar to Serine/threonine-protein kinase PCTAIRE-1 (EC 2.7.11.22);Cell division protein kinase 16;PCTAIRE-motif protein kinase 1;Serine/threonine-protein kinase PCTAIRE-1	hCG_33122;PCTK2;CDK17;PCTK2;CDK16;PCTK1	S217	0.912228	12.66	1.0071	16.37	1.30188	32.87	1.1915	22.08	0.860252		0.64512	22.83	0.758855	3.06	0.67615		1	DINKRISIPADIR		GO:0005524;GO:0004674		0	0	1.0071	16.368	5	0.95824	14.894	5	1.2927	32.873	5	1.104	12.661	8	1.2634	22.082	8	1.1831	22.075	8	0.64512	22.828	4	0.85924	15.598
B7Z8T0	cDNA FLJ56198, highly similar to Serine/threonine-protein kinase PCTAIRE-1 (EC 2.7.11.22);Cell division protein kinase 16;PCTAIRE-motif protein kinase 1;Serine/threonine-protein kinase PCTAIRE-1	CDK16;PCTK1	S251	0.862771	24.05	1.1191	27.24	1.14864	30.76	1.28909	21.13			0.81083		1.02165				0.999565	RRIRRVSISEIGF		GO:0005524;GO:0004674		0	n/a	1.1191	27.244	9	1.1585	35.719	9	1.0264	30.755	9	1.2971	24.047	10	1.5628	16.829	10	1.1519	21.133	10	0.81083		1	0.91095
B7Z8Y7	cDNA FLJ61700, highly similar to ATP-dependent DNA helicase Q5 (EC 3.6.1.-);ATP-dependent DNA helicase Q5;DNA helicase, RecQ-like type 5;RecQ protein-like 5	RECQ5;RECQL5	S488	1.02662	6.45	1.045	0.1	0.925076	13.3	0.506909	50.56			1.1436	160.9	0.293539	82.38			0.997707	SRYDEGSGGSGDE	GO:0005737;GO:0031965;GO:0005730	GO:0005524;GO:0008026;GO:0003676	GO:0006310	0	n/a	1.045	0.1046	2	1.12	23.104	2	0.88524	13.303	2	1.0179	6.4487	2	1.1887	21.07	2	0.48508	50.562	2	1.1436	160.9	11	1.0844	18.669
B7Z8Y7	cDNA FLJ61700, highly similar to ATP-dependent DNA helicase Q5 (EC 3.6.1.-);ATP-dependent DNA helicase Q5;DNA helicase, RecQ-like type 5;RecQ protein-like 5	RECQ5;RECQL5	S491	1.02662	6.45	1.045	0.1	0.925076	13.3	0.506909	50.56			1.1436	160.9	0.293539	82.38			0.997707	DEGSGGSGDEGRD	GO:0005737;GO:0031965;GO:0005730	GO:0005524;GO:0008026;GO:0003676	GO:0006310	0	n/a	1.045	0.1046	2	1.12	23.104	2	0.88524	13.303	2	1.0179	6.4487	2	1.1887	21.07	2	0.48508	50.562	2	1.1436	160.9	11	1.0844	18.669
B7Z8Y7	cDNA FLJ61700, highly similar to ATP-dependent DNA helicase Q5 (EC 3.6.1.-);ATP-dependent DNA helicase Q5;DNA helicase, RecQ-like type 5;RecQ protein-like 5	RECQ5;RECQL5	S727	1.01564	17.71	1.0327	18.28	1.26217	19.26	1.15311	21.85	1.20734	29.74	1.0853	31.7	1.07501	30.9	1.05587	10.74	0.996941	AHYGGPSPEKKAK	GO:0005737;GO:0031965;GO:0005730	GO:0005524;GO:0008026;GO:0003676	GO:0006310	0	0	1.0327	18.282	15	1.1668	10.885	15	1.2222	19.261	15	1.0168	17.713	18	0.9718	29.311	18	1.1166	21.851	18	1.0853	31.703	9	0.88885	35.423
B7Z8Y7	cDNA FLJ61700, highly similar to ATP-dependent DNA helicase Q5 (EC 3.6.1.-);ATP-dependent DNA helicase Q5;DNA helicase, RecQ-like type 5;RecQ protein-like 5	RECQ5;RECQL5	S815	0.98504	19.07	0.91327	16.71	1.0499	59.97	1.24132	27.74	0.850001	18.11	0.78682	14.03	0.851025	15.18	0.723001	11.11	0.999996	DGAGGHSPAPPQT	GO:0005737;GO:0031965;GO:0005730	GO:0005524;GO:0008026;GO:0003676	GO:0006310	0	0	0.91327	16.706	21	1.1407	62.948	21	1.1496	59.966	21	0.92714	19.065	5	1.3265	30.283	5	1.3592	27.738	5	0.78682	14.029	10	0.69527	15.329
B7ZKL3	EPS8L2 protein;Epidermal growth factor receptor kinase substrate 8-like protein 2;Epidermal growth factor receptor pathway substrate 8-related protein 2	EPS8L2;EPS8L2;EPS8R2;PP13181	S256	0.603743		0.90477	15.99	0.635438	24.53	0.810032										1	GFRRRESQEEPRA	GO:0005737;GO:0005886			0	n/a	0.90477	15.991	4	0.70485	13.177	4	0.70232	24.532	4	1.4986		1	1.2261		1	0.89529		1
B7ZKL3	EPS8L2 protein;Epidermal growth factor receptor kinase substrate 8-like protein 2;Epidermal growth factor receptor pathway substrate 8-related protein 2	EPS8L2;EPS8L2;EPS8R2;PP13181	S475			0.683		0.830596												0.31454	RQSIRNSQKHSPT	GO:0005737;GO:0005886			n/a	n/a	0.683		1	0.68976		1	1.2161		1
B7ZKL3	EPS8L2 protein;Epidermal growth factor receptor kinase substrate 8-like protein 2;Epidermal growth factor receptor pathway substrate 8-related protein 2	EPS8L2;EPS8L2;EPS8R2;PP13181	S479	0.854299		0.46174		0.450072		0.289723										0.43963	RNSQKHSPTSEPT	GO:0005737;GO:0005886			2	n/a	0.46174		1	0.5209		1	0.97473		1	0.54049		1	0.33961		1	0.62746		1
B7ZKL3	EPS8L2 protein;Epidermal growth factor receptor kinase substrate 8-like protein 2;Epidermal growth factor receptor pathway substrate 8-related protein 2	EPS8L2;EPS8L2;EPS8R2;PP13181	T481																	0.43963	SQKHSPTSEPTPP	GO:0005737;GO:0005886			n/a	n/a
B7ZKU0	C11orf30 protein;C11orf30 protein;Chromosome 11 open reading frame 30;Chromosome 11 open reading frame 30, isoform CRA_c;Protein EMSY;C11orf30 protein	C11orf30;C11orf30;C11orf30;hCG_2018629;C11orf30;EMSY;GL002;C11orf30	S188									1.1898	27.03	0.76328	23.52	0.75222	13.37	0.762211	7.64	0.779085	KSPRPASPASNVV				n/a	0										1.0076	23.113	5	1.1975	24.811	5	1.2558	17.728	5	0.76328	23.517	5	1.0363	19.901
B7ZKU0	C11orf30 protein;C11orf30 protein;Chromosome 11 open reading frame 30;Chromosome 11 open reading frame 30, isoform CRA_c;Protein EMSY;C11orf30 protein	C11orf30;C11orf30;C11orf30;hCG_2018629;C11orf30;EMSY;GL002;C11orf30	S191									1.1898	27.03	0.76328	23.52	0.75222	13.37	0.762211	7.64	0.947692	RPASPASNVVVIP				n/a	0										1.0076	23.113	5	1.1975	24.811	5	1.2558	17.728	5	0.76328	23.517	5	1.0363	19.901
B7ZKU0	C11orf30 protein;C11orf30 protein;Chromosome 11 open reading frame 30;Chromosome 11 open reading frame 30, isoform CRA_c;Protein EMSY;C11orf30 protein	C11orf30;C11orf30;C11orf30;hCG_2018629;C11orf30;EMSY;GL002;C11orf30	S224	0.868211	15.79	1.0455	18.85	1.60401	15.59	1.1397	18.96	1.10734	9.99	1.0053	19.22	1.02631	17.97	1.44049	6.66	0.987597	KRRRTNSSSSSPV				0	0	1.0455	18.849	3	1.3591	3.2576	3	1.5342	15.594	3	1.2042	15.792	10	1.4083	17.22	10	1.0901	18.962	10	1.0053	19.218	14	0.98802	31.623
B7ZLA8	KIAA1715 protein;Protein lunapark	KIAA1715;KIAA1715;LNP	S417									1.16758		0.91409		1.23804		0.833723		0.918264	IEKASDSEEPEEK				n/a	0
B7ZLM3	SAP130 protein	SAP130	S709	0.558102	88.8	0.80177	43.43	0.624042	109.4	0.492712	48.85	0.784927	4.79	0.95455	38.44	0.825648	64.33	0.963236	14.54	0.911459	MRSTSGSPRPAGA				7	0	0.80177	43.431	9	1.0789	47.083	9	0.77833	109.4	9	1.4366	88.801	2	0.97556	2.4899	2	0.61453	48.85	2	0.95455	38.437	10	1.0188	30.523
B7ZLM3	SAP130 protein;130 kDa Sin3-associated polypeptide;Histone deacetylase complex subunit SAP130;Sin3-associated polypeptide p130	SAP130;SAP130	S896			1.1971		0.681653												0.440429	STDDEKSTAKSII				n/a	n/a	1.1971		1	1.0537		1	0.56942		1
B7ZLM3	SAP130 protein;130 kDa Sin3-associated polypeptide;Histone deacetylase complex subunit SAP130;Sin3-associated polypeptide p130	SAP130;SAP130	T897			1.1971		0.681653												0.440429	TDDEKSTAKSIIV				n/a	n/a	1.1971		1	1.0537		1	0.56942		1
B7ZM82	WIZ protein;cDNA FLJ16541 fis, clone OCBBF2034823, highly similar to Mus musculus widely-interspaced zinc finger motifs (Wiz), transcript variant 1, mRNA;Protein Wiz;Widely-interspaced zinc finger-containing protein;Zinc finger protein 803	WIZ;WIZ;ZNF803	S163	0.851919	7.965	0.84029	13.64	1.26955	14.745	1.20972	20.64	1.05527	7.245	0.99789	18.95	1.21678	20.88	1.31183	8.12	0.842965	GIGHPPSSPIIKK	GO:0005622	GO:0008270		0	0	0.82246	22.105	5	1.1698	11.639	5	1.6846	21.526	5	0.9649	9.0919	4	1.3377	9.468	4	1.5065	10.613	4	1.0365	18.946	3	1.0402	8.8676
B7ZM82	WIZ protein;cDNA FLJ16541 fis, clone OCBBF2034823, highly similar to Mus musculus widely-interspaced zinc finger motifs (Wiz), transcript variant 1, mRNA;Protein Wiz;Widely-interspaced zinc finger-containing protein;Zinc finger protein 803	WIZ;WIZ;ZNF803	S164	0.987603	12.88	1.01331	20.95	1.53542	24.45	1.32004	12.345	1.01649		1.06925	14.25	1.22675	5.595	1.25581		0.579287	IGHPPSSPIIKKT	GO:0005622	GO:0008270		0	0	1.0276		1	1.4632		1	1.4155		1	0.95476	14.315	8	1.2546	14.993	8	1.3405	13.724	8	1.1024	9.8211	5	1.0121	9.0017
B7ZM82	WIZ protein;cDNA FLJ16541 fis, clone OCBBF2034823, highly similar to Mus musculus widely-interspaced zinc finger motifs (Wiz), transcript variant 1, mRNA;Protein Wiz;Widely-interspaced zinc finger-containing protein;Zinc finger protein 803	WIZ;WIZ;ZNF803	S177	0.932064	19.74	0.932055	33.435	0.836706	33.82	0.729389	14.78	1.09068	16.24	1.04241	15.595	1.02028	27.575	1.14068	12.405	0.995819	PIAIAGSPTPKNP	GO:0005622	GO:0008270		0	0	1.0237	52.574	29	0.96363	29.491	29	0.85163	56.288	29	0.99128	22.81	9	0.67716	27.134	9	0.71901	14.967	9	1.268	20.168	18	0.95585	17.618
B7ZM82	WIZ protein;cDNA FLJ16541 fis, clone OCBBF2034823, highly similar to Mus musculus widely-interspaced zinc finger motifs (Wiz), transcript variant 1, mRNA;Protein Wiz;Widely-interspaced zinc finger-containing protein;Zinc finger protein 803	WIZ;WIZ;ZNF803	S191	0.728941	13.68	0.89565	25	0.930849	16.03	0.604788	36.49	0.63858	31.99	0.68162		0.582151		0.725584	10.23	0.840233	DKSPQISISPRPA	GO:0005622	GO:0008270		0	0	0.89565	24.997	4	0.79197	24.489	4	1.0393	16.032	4	1.2287	13.681	6	0.85705	20.213	6	0.67525	36.493	6	0.68162		1	0.58106
B7ZM82	WIZ protein;cDNA FLJ16541 fis, clone OCBBF2034823, highly similar to Mus musculus widely-interspaced zinc finger motifs (Wiz), transcript variant 1, mRNA;Protein Wiz;Widely-interspaced zinc finger-containing protein;Zinc finger protein 803	WIZ;WIZ;ZNF803	S198	0.874865	13.08	0.88616	10.48	1.01531	15.965	0.782639	32.62	1.24965	23.7	1.01015	21.39	0.928647	19.66	0.915903	25.08	1	ISPRPASPKAQWP	GO:0005622	GO:0008270		0	0	0.92376	14.864	12	1.0469	29.925	12	0.97818	19.842	12	1.142	16.268	20	0.87116	16.487	20	0.76636	23.632	20	1.2247	15.175	40	1.0637	20.08
B7ZM82	WIZ protein	WIZ	S260			1.2087	4.14	1.59174	8.5											0.999236	DPDAKGSPIDVIH	GO:0005622	GO:0008270		n/a	n/a	1.2087	4.1424	2	1.5464	10.702	2	1.3169	8.5048	2
B7ZM82	WIZ protein;cDNA FLJ16541 fis, clone OCBBF2034823, highly similar to Mus musculus widely-interspaced zinc finger motifs (Wiz), transcript variant 1, mRNA;Protein Wiz;Widely-interspaced zinc finger-containing protein;Zinc finger protein 803	WIZ;WIZ;ZNF803	S420																	1	PNPPGPSPKAIAK	GO:0005622	GO:0008270		n/a	n/a
B7ZM82	WIZ protein;cDNA FLJ16541 fis, clone OCBBF2034823, highly similar to Mus musculus widely-interspaced zinc finger motifs (Wiz), transcript variant 1, mRNA;Protein Wiz;Widely-interspaced zinc finger-containing protein;Zinc finger protein 803	WIZ;WIZ;ZNF803	S441	1.07626	5.91	1.026		0.830537		1.04929	51.38	1.45586	26.84	1.3602	23.18	1.01943	24.89	0.987233	7.29	0.991221	SSIEARSPSDIHI	GO:0005622	GO:0008270		0	0	1.026		1	1.4995		1	0.80949		1	0.9533	5.9124	2	1.267	2.2897	2	1.0227	51.382	2	1.3602	23.175	4	1.0793	16.108
B7ZM82	WIZ protein;cDNA FLJ16541 fis, clone OCBBF2034823, highly similar to Mus musculus widely-interspaced zinc finger motifs (Wiz), transcript variant 1, mRNA;Protein Wiz;Widely-interspaced zinc finger-containing protein;Zinc finger protein 803	WIZ;WIZ;ZNF803	S448	1.2867	13.36	0.94808	31.61	0.891963	28.59	1.25422	34.44	1.15054	19.11	1.0267	19.69	0.864451	28.25	0.93058	23.82	0.999996	PSDIHISPIAKKI	GO:0005622	GO:0008270		0	0	0.94808	31.61	20	1.0354	30.159	20	0.94081	28.586	20	0.73683	13.364	4	1.0517	21.106	4	1.3229	34.443	4	1.0267	19.693	11	0.94439	20.842
B7ZM82	WIZ protein;cDNA FLJ16541 fis, clone OCBBF2034823, highly similar to Mus musculus widely-interspaced zinc finger motifs (Wiz), transcript variant 1, mRNA;Protein Wiz;Widely-interspaced zinc finger-containing protein;Zinc finger protein 803	WIZ;WIZ;ZNF803	S465	1.0659	9.47	0.6892	1.83	0.868151	3.7	0.767769	13.46	1.26416	17.53	0.84011	30.51	0.854476	9.15	0.909839	32.68	0.822495	GSPIGHSPTASPP	GO:0005622	GO:0008270		0	0	0.68746	1.8261	2	0.94874	9.6867	2	1.3472	3.6954	2	0.64659	9.4665	3	0.61359	40.882	3	1.114	13.46	3	0.84011	30.506	7	0.76564	25.913
B8ZZ98	Putative uncharacterized protein SNRNP27;Nucleic acid-binding protein RY-1;U4/U6.U5 small nuclear ribonucleoprotein 27 kDa protein;U4/U6.U5 tri-snRNP-associated 27 kDa protein;U4/U6.U5 tri-snRNP-associated protein 3	SNRNP27;SNRNP27	S59	0.910553	2.35	0.94998	12.93	0.96081	14.48	0.86547	3.04	1.05253	14.43	1.1781		1.188		1.28554	8.94	0.997472	SPRRHRSTSPSPS				0	0	0.94998	12.929	5	1.0472	12.802	5	1.0114	14.48	5	1.0433	2.3486	4	0.95887	2.8668	4	0.91104	3.0357	4	1.1781		1	1.0659
B8ZZ98	Putative uncharacterized protein SNRNP27;Nucleic acid-binding protein RY-1;U4/U6.U5 small nuclear ribonucleoprotein 27 kDa protein;U4/U6.U5 tri-snRNP-associated 27 kDa protein;U4/U6.U5 tri-snRNP-associated protein 3	SNRNP27;SNRNP27	S61	1.05474		1.1041	8.82	1.1083	1.06	1.00123		1.05253	9.17	1.1781		1.188		1.33809	18.91	0.992115	RRHRSTSPSPSRI				0	0	1.1041	8.8159	2	1.0034	7.4721	2	1.0038	1.062	2	1.0468		1	0.97524		1	0.90683		1	1.1781		1	1.0659
B8ZZN6	Putative uncharacterized protein SUMO1;GAP-modifying protein 1;Sentrin;Small ubiquitin-related modifier 1;SMT3 homolog 3;Ubiquitin-homology domain protein PIC1;Ubiquitin-like protein SMT3C;Ubiquitin-like protein UBL1;Putative uncharacterized protein SUMO1;Putative uncharacterized protein SUMO1	SUMO1;OK/SW-cl.43;SMT3C;SMT3H3;SUMO1;UBL1;SUMO1;SUMO1	S2	1.08626	60.265	1.27625	29.005	1.56455	58.495	1.40368	36.285	0.964922	42.68	1.0962	25.18	1.41344	48.6	1.20439	36.485	1	_____MSDQEAKP				0	0	1.3241	29.573	75	1.5822	28.125	75	1.2988	45.149	75	1.3426	96.674	39	1.4104	104.5	39	1.1898	38.639	39	1.0734	23.93	48	1.2639	37.713
B8ZZS0	Putative uncharacterized protein BET1L;BET1-like protein;Golgi SNARE with a size of 15 kDa;Vesicle transport protein GOS15	BET1L;BET1L;GS15	S9			1.0432	17.34	1.15169	38.94			1.3835		1.0651	57.91	0.988956	12.91	0.975419		1	DWARAQSPGAVEE				n/a	0	1.0432	17.341	6	1.4365	17.264	6	1.104	38.939	6										1.0651	57.908	7	0.84413	37.389
B9EG97	ZFX protein;Zinc finger X-chromosomal protein;Zinc finger Y-chromosomal protein;ZFY protein;cDNA FLJ50242, highly similar to Zinc finger Y-chromosomal protein	ZFX;ZFX;ZFY;ZFY	S313	1.66108		1.0655	11.55	0.992897	8.03	0.966984		0.898669	124.58	0.67162	46.18	0.549969	17.83	0.614197	13	0.983657	TVDIVESEPENDH	GO:0005634	GO:0003677;GO:0008270	GO:0006355	0	0	1.0655	11.554	12	0.90351	24.22	12	0.93186	8.0285	12	0.64145		1	0.90189		1	0.90754		1	0.67162	46.176	3	0.78121	12.977
B9EGQ7	EIF4G3 protein;eIF-4-gamma II;Eukaryotic translation initiation factor 4 gamma 3;EIF4G3 protein	EIF4G3;EIF4G3;EIF4G3	S1162	0.898323	29.62	1.168	36.17	0.726379	56.45	0.924671	31.5	3.22738		1.2164	62.31	1.35422	20.85	0.907057		0.857954	TFMRGGSSKDIID				0	8	1.168	36.17	14	0.88822	68.677	14	0.6219	56.445	14	1.3002	29.619	17	1.2345	25.5	17	0.79167	31.497	17	1.2164	62.307	8	1.6874	27.617
B9EGQ7	EIF4G3 protein;eIF-4-gamma II;Eukaryotic translation initiation factor 4 gamma 3	EIF4G3;EIF4G3	S501	1.01465	25.1	0.999615	13.325	0.977529	22.8	1.15071	16.775	0.726457	10.18	0.854205	19.81	1.09103	9.505	0.78185	14.44	1	NINSRRSPVPAQI				0	0	0.98993	17.102	50	0.91244	21.136	50	1.0564	26.525	50	1.0982	24.959	17	1.0891	22.266	17	1.0638	17.558	17	0.73644	20.507	19	0.93119	23.877
C9IYI1	Putative uncharacterized protein DMKN;Putative uncharacterized protein DMKN;Putative uncharacterized protein DMKN;Putative uncharacterized protein DMKN	DMKN;DMKN;DMKN;DMKN	S6																	0.544531	_MIGITSCSDQQA				n/a	n/a
C9IYI1	Putative uncharacterized protein DMKN;Putative uncharacterized protein DMKN;Putative uncharacterized protein DMKN;Putative uncharacterized protein DMKN	DMKN;DMKN;DMKN;DMKN	S8																	0.910938	IGITSCSDQQAKE				n/a	n/a
C9J1W7	Putative uncharacterized protein SFRS15;CTD-binding SR-like protein RA4;Splicing factor, arginine/serine-rich 15;Putative uncharacterized protein SFRS15;Putative uncharacterized protein SFRS15	SFRS15;KIAA1172;SFRS15;SFRS15;SFRS15	S154			0.9446		1.33415												0.997806	VTNNEGSPPPPVK		GO:0003676;GO:0000166		n/a	n/a
C9J1W7	Putative uncharacterized protein SFRS15;CTD-binding SR-like protein RA4;Splicing factor, arginine/serine-rich 15;Putative uncharacterized protein SFRS15;Putative uncharacterized protein SFRS15	SFRS15;KIAA1172;SFRS15;SFRS15;SFRS15	S656	0.974383	14.84	0.70634	21.04	0.749427	31.69	0.819566	12.23	0.774224	15.34	0.6966	18.41	0.565667	22	0.691738	15.84	0.999863	SHTEPVSPIPKPI		GO:0003676;GO:0000166		0	0	0.70634	21.04	11	0.65824	39.18	11	1.061	31.69	11	0.72491	14.841	19	0.7856	17.587	19	1.1603	12.226	19	0.6966	18.412	8	0.55102	25.034
C9J4C3	DNA topoisomerase 2;DNA topoisomerase 2;DNA topoisomerase 2-alpha;DNA topoisomerase II, alpha isozyme	TOP2A;TOP2A;TOP2;TOP2A	S1187	0.975332	23.71	1.2336	18.14	0.982279	29.84	1.05	21.34	1.19805	16.61	1.3042	16.51	0.967808	17.22	0.69418	22.37	0.999998	EEENEESDNEKET	GO:0005694;GO:0005634	GO:0005524;GO:0003918	GO:0006265	0	0	1.2336	18.143	84	1.0999	21.337	85	0.79627	29.839	85	1.2648	23.709	29	1.0674	24.56	29	0.85117	21.336	29	1.3042	16.508	41	0.95426	19.733
C9J4C3	DNA topoisomerase 2;DNA topoisomerase 2;DNA topoisomerase 2-alpha;DNA topoisomerase II, alpha isozyme	TOP2A;TOP2A;TOP2;TOP2A	S1294	1.09574	9.755	1.1332	74.83	1.32533	24.66	1.14713	16.9	1.12134	12.985	1.1843	13.515	1.16113	11.74	1.31955	14.385	1	MAEVIPSPRGQRV	GO:0005694;GO:0005634	GO:0005524;GO:0003918	GO:0006265	0	0	1.173	98.717	12	1.2363	59.434	12	1.1996	22.81	11	0.88137	11.527	5	0.78709	24.621	5	0.95989	15.87	5	1.193	16.319	12	1.0681	16.554
C9J4C3	DNA topoisomerase 2;DNA topoisomerase 2;DNA topoisomerase 2-alpha;DNA topoisomerase II, alpha isozyme	TOP2A;TOP2A;TOP2;TOP2A	S1328	0.966395	15.975	1.192	19.955	1.15563	36.605	1.16945	30.79	1.05651	20.085	1.22365	23.775	1.12118	18.88	1.11717	21.215	1	NENTEGSPQEDGV	GO:0005694;GO:0005634	GO:0005524;GO:0003918	GO:0006265	0	0	1.1723	24.807	131	1.1946	28.772	131	0.9856	36.415	131	1.1551	22.069	63	1.1834	34.522	63	1.026	33.833	63	1.2419	25.262	100	1.041	31.83
C9J4C3	DNA topoisomerase 2;DNA topoisomerase 2;DNA topoisomerase 2-alpha;DNA topoisomerase II, alpha isozyme	TOP2A;TOP2A;TOP2;TOP2A	S1413			0.52554	17.24	0.457015	40.97											0.963351	FTMDIDSDEDFSD	GO:0005694;GO:0005634	GO:0005524;GO:0003918	GO:0006265	n/a	n/a	0.52554	17.236	6	0.55345	39.909	6	0.86961	40.967	6
C9J4C3	DNA topoisomerase 2;DNA topoisomerase 2;DNA topoisomerase 2-alpha;DNA topoisomerase II, alpha isozyme	TOP2A;TOP2A;TOP2;TOP2A	S1418			0.52554	17.24	0.457015	40.97											0.999658	DSDEDFSDFDEKT	GO:0005694;GO:0005634	GO:0005524;GO:0003918	GO:0006265	n/a	n/a	0.52554	17.236	6	0.55345	39.909	6	0.86961	40.967	6
C9J4C3	DNA topoisomerase 2;DNA topoisomerase 2;DNA topoisomerase 2-alpha;DNA topoisomerase II, alpha isozyme	TOP2A;TOP2A;TOP2;TOP2A	S1432																	1	DEDFVPSDASPPK	GO:0005694;GO:0005634	GO:0005524;GO:0003918	GO:0006265	n/a	n/a										0.81715		1	0.71855		1	0.90442		1
C9J4C3	DNA topoisomerase 2;DNA topoisomerase 2;DNA topoisomerase 2-alpha;DNA topoisomerase II, alpha isozyme	TOP2A;TOP2A;TOP2;TOP2A	S1435																	1	FVPSDASPPKTKT	GO:0005694;GO:0005634	GO:0005524;GO:0003918	GO:0006265	n/a	n/a										0.81715		1	0.71855		1	0.90442		1
C9J4C3	DNA topoisomerase 2;DNA topoisomerase 2;DNA topoisomerase 2-alpha;DNA topoisomerase II, alpha isozyme	TOP2A;TOP2A;TOP2;TOP2A	S1474	1.0984	20.37	0.933845	20.385	0.891066	10.29	0.917783	6.55	1.02794	8.56	1.17175	11.58	1.06977	22.7	1.16452	4.21	0.894502	SVPISSSPPATHF	GO:0005694;GO:0005634	GO:0005524;GO:0003918	GO:0006265	0	0	0.96223	35.391	4	1.0638	19.521	4	1.0144	8.773	4	0.85019	20.37	4	1.004	3.3808	4	0.9828	6.5452	4	1.2945		1	0.98835
C9J4C3	DNA topoisomerase 2;DNA topoisomerase 2;DNA topoisomerase 2-alpha;DNA topoisomerase II, alpha isozyme	TOP2A;TOP2A;TOP2;TOP2A	S1550	1.52629	33	1.3381	10.16	1.30684	11	1.37115	57.28	0.603845	22.32	0.65167	86.37	0.300635	63.32	0.544457	33.96	0.876277	RRKRKPSTSDDSD	GO:0005694;GO:0005634	GO:0005524;GO:0003918	GO:0006265	0	1	1.3381	10.159	3	1.3746	2.1837	3	0.97664	10.996	3	0.8767	32.998	2	0.90309	3.7334	2	1.0247	57.279	2	0.65167	86.369	2	0.61184	17.324
C9J4C3	DNA topoisomerase 2;DNA topoisomerase 2;DNA topoisomerase 2-alpha;DNA topoisomerase II, alpha isozyme	TOP2A;TOP2A;TOP2;TOP2A	S1585	1.19721	17.78	1.5553	27.85	1.79093	21.57	1.3204	19.77	1.14891	33.38	1.4729	11.72	1.38316	10.11	1.46574	12.18	0.999974	FHMDFDSAVAPRA	GO:0005694;GO:0005634	GO:0005524;GO:0003918	GO:0006265	0	0	1.5553	27.852	16	1.8929	25.764	16	1.1515	21.57	16	1.2991	17.775	14	1.0799	14.127	14	0.84897	19.77	14	1.4729	11.723	18	1.3338	11.859
C9J4C3	DNA topoisomerase 2;DNA topoisomerase 2;DNA topoisomerase 2-alpha;DNA topoisomerase II, alpha isozyme	TOP2A;TOP2A;TOP2;TOP2A	S1606	0.921114	21.41	1.3428		1.15367		1.36684	35.49	0.962726	9.63	1.3973		1.0686		1.26273	17.92	1	IKYIEESDEDDIF	GO:0005694;GO:0005634	GO:0005524;GO:0003918	GO:0006265	0	0
C9J4C3	DNA topoisomerase 2;DNA topoisomerase 2;DNA topoisomerase 2-alpha;DNA topoisomerase II, alpha isozyme	TOP2A;TOP2A;TOP2;TOP2A	S4	0.95291	18.34	1.0978	9.18	0.89575	41.81	1.14841	15.4	1.04461	17.55	1.1755	16.83	1.02117	16.06	0.96418	47.74	1	___MEVSPIQPVN	GO:0005694;GO:0005634	GO:0005524;GO:0003918	GO:0006265	0	0										1.0475		1	1.0736		1	1.1765		1
C9J4C3	DNA topoisomerase 2;DNA topoisomerase 2;DNA topoisomerase 2-alpha;DNA topoisomerase II, alpha isozyme	TOP2A;TOP2A;TOP2;TOP2A	T1478																	0.434539	SSSPPATHFPDET	GO:0005694;GO:0005634	GO:0005524;GO:0003918	GO:0006265	n/a	n/a
C9J4C3	DNA topoisomerase 2;DNA topoisomerase 2;DNA topoisomerase 2-alpha;DNA topoisomerase II, alpha isozyme	TOP2A;TOP2A;TOP2;TOP2A	T1551	1.30875	19.15	1.3204	21.3	1.51635	16.39	1.44135	3.37	1.01456	26.76	1.0592	27.05	0.960959	21.95	0.952364	42.76	0.612104	RKRKPSTSDDSDS	GO:0005694;GO:0005634	GO:0005524;GO:0003918	GO:0006265	0	0	1.3204	21.303	3	1.395	17.234	3	1.1484	16.388	3	1.0089	19.154	3	1.1338	19.867	3	1.0916	3.3735	3	1.0592	27.046	3	0.99052	7.3711
C9J6P4	Putative uncharacterized protein ZC3HAV1;Zinc finger antiviral protein;Zinc finger CCCH domain-containing protein 2;Zinc finger CCCH-type antiviral protein 1	ZC3HAV1;PRO1677;ZC3HAV1;ZC3HDC2	S284	1.05244	21.49	0.932	20.56	0.956884	21.72	0.796236	42.17	0.824662	4.57	0.80835	40.36	0.660858	20.63	0.777786	6.58	1	QISHRASIEDAPV		GO:0003950;GO:0003676;GO:0008270		0	0	0.932	20.562	11	0.95411	23.008	11	1.0267	21.722	11	0.88556	21.489	2	0.64892	17.989	2	0.85433	42.166	2	0.80835	40.363	7	0.84706	20.11
C9J6P4	Putative uncharacterized protein ZC3HAV1;Zinc finger antiviral protein;Zinc finger CCCH domain-containing protein 2;Zinc finger CCCH-type antiviral protein 1	ZC3HAV1;PRO1677;ZC3HAV1;ZC3HDC2	S335	0.99342	10.44	1.0417	31.22	1.08816	13.28	1.36973	20.49	1.03797	17.29	0.97683	19.98	0.98103	19.31	1.0075	9.9	0.981176	RFIENGSQEDIIH		GO:0003950;GO:0003676;GO:0008270		0	0	1.0417	31.22	23	1.2127	9.8961	23	1.0446	13.28	23	1.0486	10.443	6	1.1887	8.8217	6	1.3149	20.492	6	0.97683	19.984	12	0.93758	15.758
C9JA69	Putative uncharacterized protein BBX;Bobby sox homolog;HMG box transcription factor BBX;HMG box-containing protein 2	BBX;BBX;HBP2	S794	1.01058	25.06	1.1935	26.26	1.42802	47.74	1.45559	17.12	0.788421	31.54	0.97575	18.57	1.18671	25.26	1.25208	13.86	0.999439	TADGRVSPAGGTI				0	0	1.1935	26.264	10	1.1599	35.681	10	1.1965	47.743	10	1.181	25.055	14	1.3111	30.43	14	1.2196	17.121	14	0.97575	18.574	13	1.2139	26.105
C9JDD6	Microtubule-associated protein;Microtubule-associated protein;Microtubule-associated protein tau;Neurofibrillary tangle protein;Paired helical filament-tau	MAPT;MAPTL;MTBT1;TAU	S572			0.32418	20.84	0.209958	42.11					1.2126		1.14763				0.802627	TPPKSPSSAKSRI	GO:0005874		GO:0007026	n/a	n/a	0.32418	20.844	3	0.35385	67.785	3	0.64766	42.113	3										1.2126		1	1.6063
C9JDD6	Microtubule-associated protein;Microtubule-associated protein;Microtubule-associated protein tau;Neurofibrillary tangle protein;Paired helical filament-tau	MAPT;MAPTL;MTBT1;TAU	S731	0.918486	36.7	1.031	20.87	0.849987	8.75	1.13987	16.28			0.074804		0.0773548				0.999798	AEIVYKSPVVSGD	GO:0005874		GO:0007026	0	n/a	1.031	20.871	10	0.74649	31.657	10	0.82443	8.7467	10	1.1225	36.698	14	1.3231	12.734	14	1.1056	16.279	14	0.074804		1	0.18594
C9JDD6	Microtubule-associated protein;Microtubule-associated protein;Microtubule-associated protein tau;Neurofibrillary tangle protein;Paired helical filament-tau	MAPT;MAPTL;MTBT1;TAU	T566			0.41505	22	0.308121	27.03					1.2126		1.14763				0.999654	KVAVVRTPPKSPS	GO:0005874		GO:0007026	n/a	n/a	0.41505	21.997	6	0.3726	44.901	6	0.74237	27.033	6										1.2126		1	1.6063
C9JDD6	Microtubule-associated protein;Microtubule-associated protein;Microtubule-associated protein tau;Neurofibrillary tangle protein;Paired helical filament-tau	MAPT;MAPTL;MTBT1;TAU	T738	0.803449		1.0575	21.36	0.883933	8.81	1.27482				1.019	0.91	1.389	19.94			0.549178	PVVSGDTSPRHIS	GO:0005874		GO:0007026	0	n/a	1.0575	21.355	7	0.79281	29.698	7	0.83587	8.8148	7	1.3162		1	1.3484		1	1.2055		1	1.019	0.90503	2	1.3766	9.5003
C9JE52	Putative uncharacterized protein PSME2;Putative uncharacterized protein PSME2;11S regulator complex subunit beta;Activator of multicatalytic protease subunit 2;Proteasome activator 28 subunit beta;Proteasome activator complex subunit 2	PSME2;PSME2;PSME2	S10			1.1099	62.42	0.867365	57.47					0.84485	5.28	1.35624	10.96			1	PCGVRISGEARKQ	GO:0008537			n/a	n/a	1.1099	62.423	34	0.82307	62.868	34	0.78148	57.474	34										0.84485	5.2763	3	1.3177	9.2648
C9JEE1	Putative uncharacterized protein ENSP00000403390;Hepatoma-derived growth factor 2;Hepatoma-derived growth factor-related protein 2	HDGF2;HDGFRP2;UNQ785/PRO1604	S366	0.792038	12.32	0.89825		0.794861		0.937144	14.97	0.418863	17.57	0.41991		0.453629		0.491967	11.24	1	GEAERGSGGSSGD	GO:0005634	GO:0003677	GO:0006351	0	7	0.89825		1	0.56174		1	0.8849		1	1.1341	12.322	7	1.0758	11.619	7	1.0433	14.968	7	0.41991		1	0.4784
C9JEE1	Putative uncharacterized protein ENSP00000403390;Hepatoma-derived growth factor 2;Hepatoma-derived growth factor-related protein 2	HDGF2;HDGFRP2;UNQ785/PRO1604	S369	0.963308	23.04	0.96379	26.17	1.00928	26.25	0.995788	16.94	0.418863	17.57	0.41991		0.453629		0.491967	11.24	1	ERGSGGSSGDEIR	GO:0005634	GO:0003677	GO:0006351	0	7	0.96379	26.168	6	0.85828	14.317	6	1.0472	26.252	6	1.0005	23.042	14	1.0511	22.071	14	1.0332	16.943	14	0.41991		1	0.4784
C9JEE1	Putative uncharacterized protein ENSP00000403390;Hepatoma-derived growth factor 2;Hepatoma-derived growth factor-related protein 2	HDGF2;HDGFRP2;UNQ785/PRO1604	S370	0.985581	24.33	0.96379	26.17	1.00928	26.25	1.00388	15.96	0.206763	17.57	0.20728	28.04	0.150562	40.97	0.242849	11.24	1	RGSGGSSGDEIRE	GO:0005634	GO:0003677	GO:0006351	0	7	0.96379	26.168	6	0.85828	14.317	6	1.0472	26.252	6	0.97789	24.328	12	1.0506	23.089	12	1.0416	15.959	12	0.20728	28.038	3	0.1254	61.864
C9JEE1	Putative uncharacterized protein ENSP00000403390;Hepatoma-derived growth factor 2;Hepatoma-derived growth factor-related protein 2	HDGF2;HDGFRP2;UNQ785/PRO1604	S395																	1	RGRGPPSSSDSEP	GO:0005634	GO:0003677	GO:0006351	n/a	n/a										0.84887	14.628	10	0.76498	17.591	10	0.84884	17.939	10
C9JEE1	Putative uncharacterized protein ENSP00000403390;Hepatoma-derived growth factor 2;Hepatoma-derived growth factor-related protein 2	HDGF2;HDGFRP2;UNQ785/PRO1604	S396																	1	GRGPPSSSDSEPE	GO:0005634	GO:0003677	GO:0006351	n/a	n/a										0.84887	14.628	10	0.76498	17.591	10	0.84884	17.939	10
C9JEE1	Putative uncharacterized protein ENSP00000403390;Hepatoma-derived growth factor 2;Hepatoma-derived growth factor-related protein 2	HDGF2;HDGFRP2;UNQ785/PRO1604	S397																	1	RGPPSSSDSEPEA	GO:0005634	GO:0003677	GO:0006351	n/a	n/a										0.84887	14.628	10	0.76498	17.591	10	0.84884	17.939	10
C9JEE1	Putative uncharacterized protein ENSP00000403390;Hepatoma-derived growth factor 2;Hepatoma-derived growth factor-related protein 2	HDGF2;HDGFRP2;UNQ785/PRO1604	S399																	1	PPSSSDSEPEAEI	GO:0005634	GO:0003677	GO:0006351	n/a	n/a										0.84887	14.628	10	0.76498	17.591	10	0.84884	17.939	10
C9JEE1	Putative uncharacterized protein ENSP00000403390;Hepatoma-derived growth factor 2;Hepatoma-derived growth factor-related protein 2	HDGF2;HDGFRP2;UNQ785/PRO1604	S454	1.18496	42.335	1.3879	20.17	1.23454	56.715	0.680626	55.075	1.1775	34.94	0.67281	31.605	0.278997	45.59	0.12996	107.69	1	ERTRKRSEGFSMD	GO:0005634	GO:0003677	GO:0006351	0	2	1.403	12.677	10	1.3213	24.409	10	1.003	24.531	10	1.4216	3.7846	6	0.90347	7.176	6	0.62957	14.385	6	0.75421	35.721	10	0.38047	30.548
C9JEE1	Putative uncharacterized protein ENSP00000403390;Hepatoma-derived growth factor 2;Hepatoma-derived growth factor-related protein 2	HDGF2;HDGFRP2;UNQ785/PRO1604	S630	0.865782	14.28	0.74614	8.64	0.654327	25.3	0.556859	41.81			0.72425	45.38	0.91509	0.61			0.996248	HEEGRDSEEGPRC	GO:0005634	GO:0003677	GO:0006351	0	n/a	0.74614	8.6396	2	0.6273	8.4291	2	0.87695	25.297	2	0.86181	14.279	2	0.93125	11.976	2	0.74632	41.809	2	0.72425	45.38	2	0.7971	3.6641
C9JEE1	Putative uncharacterized protein ENSP00000403390;Hepatoma-derived growth factor 2;Hepatoma-derived growth factor-related protein 2	HDGF2;HDGFRP2;UNQ785/PRO1604	S656			0.7487	31.16	0.708165	116.16			1.08913	27.5	0.9308	39.88	0.949137	54.29	0.923772	16.32	1	DIDRPGSDRQERE	GO:0005634	GO:0003677	GO:0006351	n/a	0	0.7487	31.161	14	0.70202	122.2	14	0.94586	116.16	14										0.9308	39.881	23	0.88645	49.307
C9JEE1	Putative uncharacterized protein ENSP00000403390;Hepatoma-derived growth factor 2;Hepatoma-derived growth factor-related protein 2	HDGF2;HDGFRP2;UNQ785/PRO1604	S668	1.19928	17.21	1.0665	23.29	1.17475	66.465	1.09996	40.27	0.956645	19.785	0.95698	13.155	0.949248	37.425	0.773206	22.825	1	ERARGDSEAIDEE	GO:0005634	GO:0003677	GO:0006351	0	0	1.1198	17.472	16	1.2605	26.695	16	1.1004	38.491	16	0.91869	19.774	9	1.132	24.412	9	0.95485	40.331	9	0.99298	15.616	9	0.82361	30.573
C9JFC3	Microtubule-associated protein	MAP4	S76	0.964119	14.18	0.92324	10.96	0.826623	21.4	1.08573	15.72			0.75265	6.15	1.0218	14.84			0.999938	TSQIEGSPTEFIE				0	n/a	0.92324	10.956	9	0.8169	20.023	9	0.89535	21.403	9	0.9576	14.181	17	1.0812	12.839	17	1.176	15.719	17	0.75265	6.1517	8	1.0212	12.488
C9JI98	Putative uncharacterized protein ENSP00000416154		S175																	1	GAAGAGSE_____	GO:0016021			n/a	n/a
C9JLW8	Protein FAM195B	FAM195B	S21	0.842303	5.73	0.75878	14.45	0.475459	13.77	0.574601	25.42	0.541496	24.28	0.59218	8.46	0.513077	19.36	0.522415	6.44	0.998025	RTSSPRSPPSSSE				1	0	0.75878	14.45	22	0.47554	22.589	22	0.62661	13.77	22	0.90084	5.7253	8	0.7127	20.133	8	0.75727	25.418	8	0.59218	8.4589	4	0.59283	11.357
C9JME2	Putative uncharacterized protein FARP1;Chondrocyte-derived ezrin-like protein;FERM, RhoGEF and pleckstrin domain-containing protein 1;Pleckstrin homology domain-containing family C member 2	FARP1;CDEP;FARP1;PLEKHC2	S427	0.846775	16.4	0.87167	44.34	1.32668	31.2	1.15026	26.2	1.47251	22.32	0.97752	18.09	0.997657	27.3	1.02561	33.05	0.979879	EPGSHPSPAPRRS	GO:0005737;GO:0005856;GO:0019898	GO:0008092;GO:0005543;GO:0005089	GO:0035023	0	0	0.87167	44.343	18	1.5043	32.128	18	1.522	31.195	18	1.0294	16.395	5	1.183	18.084	5	1.3196	26.203	5	0.97752	18.088	8	0.90743	33.629
C9JME2	Putative uncharacterized protein FARP1;Chondrocyte-derived ezrin-like protein;FERM, RhoGEF and pleckstrin domain-containing protein 1;Pleckstrin homology domain-containing family C member 2	FARP1;CDEP;FARP1;PLEKHC2	T24	0.970572	24.03	1.0356	7.86	1.28746	26.64	1.0745	23.99	0.983858	11.77	0.95628	11.33	1.06702	10.08	1.1253	11.67	0.994806	ENSGISTIERGQK	GO:0005737;GO:0005856;GO:0019898	GO:0008092;GO:0005543;GO:0005089	GO:0035023	0	0										1.0993		1	1.2494		1	0.95553		1
C9JP52	Putative uncharacterized protein TBC1D5;TBC1 domain family member 5;Putative uncharacterized protein TBC1D5;Putative uncharacterized protein TBC1D5;Putative uncharacterized protein TBC1D5;Putative uncharacterized protein TBC1D5;Putative uncharacterized protein TBC1D5;Putative uncharacterized protein TBC1D5;Putative uncharacterized protein TBC1D5	TBC1D5;KIAA0210;TBC1D5;TBC1D5;TBC1D5;TBC1D5;TBC1D5;TBC1D5;TBC1D5;TBC1D5	S48																	0.758459	TSSTIDSEGTFNS	GO:0005622	GO:0005097		n/a	n/a
C9JQJ0	Putative uncharacterized protein SRPK2;Serine/arginine-rich protein-specific kinase 2;Serine/threonine-protein kinase SRPK2;SFRS protein kinase 2	SRPK2;SRPK2	S505	0.992816	9.09	1.0503	9.64	1.36402	7.65	1.4701	16.66	0.872901	12.66	0.88905	4.38	1.04952	5.61	0.618068	12.19	0.999942	DRSRTVSASSTGD		GO:0005524;GO:0004674		0	0	1.0503	9.6367	5	1.3555	12.93	5	1.2987	7.6495	5	1.0579	9.0865	9	1.3137	16.916	9	1.3997	16.66	9	0.88905	4.382	4	0.94143	3.7321
C9JQJ0	Putative uncharacterized protein SRPK2;Serine/arginine-rich protein-specific kinase 2;Serine/threonine-protein kinase SRPK2;SFRS protein kinase 2	SRPK2;SRPK2	S508	0.939819	21.93	1.051	1.62	1.36493	4.75	1.52469	0.55	0.82314	9.07	0.86405	4.17	0.9775	1.21	0.576615	15.09	0.905988	RTVSASSTGDIPK		GO:0005524;GO:0004674		0	0	1.051	1.6206	3	1.4169	2.5933	3	1.2987	4.7519	3	1.1183	21.934	2	1.3893	18.573	2	1.4507	0.54909	2	0.86405	4.165	2	0.9106	1.9648
C9JQW2	Asparagine-linked glycosylation 3 homolog (Yeast, alpha-1,3-mannosyltransferase), isoform CRA_b;Putative uncharacterized protein ALG3;Asparagine-linked glycosylation protein 3 homolog;Dolichyl-phosphate-mannose--glycolipid alpha-mannosyltransferase;Dolichyl-P-Man:Man(5)GlcNAc(2)-PP-dolichyl mannosyltransferase;Dol-P-Man-dependent alpha(1-3)-mannosyltransferase;Not56-like protein	ALG3;hCG_40494;ALG3;NOT;NOT56L	S13	0.770925	15.5	1.1974	12.74	1.5007	13.79	1.51268	7.65	1.12231	8.65	1.2094	23.28	1.14655	2.07	1.64926	0.13	0.958127	KRGRSGSAAQAEG	GO:0005783;GO:0016021	GO:0016758		0	0	1.1974	12.743	4	1.4666	5.0294	4	1.2533	13.785	4	1.5532	15.501	2	2.1476	7.9829	2	1.2633	7.646	2	1.2094	23.283	2	1.2331	15.77
C9JS35	Putative uncharacterized protein UFD1L;Ubiquitin fusion degradation protein 1 homolog;Putative uncharacterized protein UFD1L;Putative uncharacterized protein UFD1L;Putative uncharacterized protein UFD1L	UFD1L;UFD1L;UFD1L;UFD1L;UFD1L	S281			1.0453		1.09453						0.68503	21.18	0.714692	36.12			0.572131	KKGVEPSPSPIKP			GO:0006511	n/a	n/a																			0.68503	21.182	7	0.95577	26.238
C9JS35	Putative uncharacterized protein UFD1L;Ubiquitin fusion degradation protein 1 homolog;Putative uncharacterized protein UFD1L;Putative uncharacterized protein UFD1L;Putative uncharacterized protein UFD1L	UFD1L;UFD1L;UFD1L;UFD1L;UFD1L	S283	0.985869	13.76	0.907295	16.365	1.00324	24.695	0.901951	20.9	0.780045	65.675	0.77641	14.795	1.04148	13.435	0.724472	14.805	0.997264	GVEPSPSPIKPGD			GO:0006511	0	0	0.87137	28.296	15	0.85695	24.278	15	1.0927	26.971	15	0.86659	13.762	12	1.1503	19.937	12	1.2766	20.902	12	0.71587	17.686	9	0.98095	26.284
C9JUT5	Putative uncharacterized protein HERC1;HECT domain and RCC1-like domain-containing protein 1;p532;p619;Probable E3 ubiquitin-protein ligase HERC1	HERC1;HERC1	S1428	0.866034	7.42	0.87149	3.55	0.767007	25.79	0.735015	40.74	0.577949		0.38889		0.311501		0.307165		0.968848	QQERRVSTDIPEG	GO:0005622	GO:0016881	GO:0006464	0	2	0.87149	3.5492	3	0.73713	24.489	3	0.88011	25.794	3	1.0063	7.4167	5	1.1423	13.243	5	0.8434	40.742	5	0.38889		1	0.79162
C9JUT5	Putative uncharacterized protein HERC1;HECT domain and RCC1-like domain-containing protein 1;p532;p619;Probable E3 ubiquitin-protein ligase HERC1	HERC1;HERC1	S1510											1.1429		1.2493				0.855005	NYRIIKSRSESDI	GO:0005622	GO:0016881	GO:0006464	n/a	n/a										1.0071	13.503	4	0.91592	4.9048	4	0.85597	8.9439	4	1.1429		1	1.4565
C9JUT5	Putative uncharacterized protein HERC1;HECT domain and RCC1-like domain-containing protein 1;p532;p619;Probable E3 ubiquitin-protein ligase HERC1	HERC1;HERC1	S1512																	0.45075	RIIKSRSESDISQ	GO:0005622	GO:0016881	GO:0006464	n/a	n/a
C9JUT5	Putative uncharacterized protein HERC1;HECT domain and RCC1-like domain-containing protein 1;p532;p619;Probable E3 ubiquitin-protein ligase HERC1	HERC1;HERC1	S1521	0.955644	11.75	0.93268	11.4	0.740912	15.02	0.812439	7.93			0.63051	56.87	0.651632	12.34			0.989521	DISQPESDEEGYA	GO:0005622	GO:0016881	GO:0006464	0	n/a	0.93268	11.397	2	0.57224	14.673	2	0.79439	15.018	2	0.97597	11.754	5	0.90657	6.7563	5	0.87108	7.9305	5	0.63051	56.871	3	0.70555	44.564
C9JUT5	Putative uncharacterized protein HERC1;HECT domain and RCC1-like domain-containing protein 1;p532;p619;Probable E3 ubiquitin-protein ligase HERC1	HERC1;HERC1	S4858																	0.849003	VDNAEGSDTDY__	GO:0005622	GO:0016881	GO:0006464	n/a	n/a
C9K0J5	Putative uncharacterized protein RAPH1;Ras association (RalGDS/AF-6) and pleckstrin homology domains 1, isoform CRA_b;Amyotrophic lateral sclerosis 2 chromosomal region candidate gene 18 protein;Amyotrophic lateral sclerosis 2 chromosomal region candidate gene 9 protein;Lamellipodin;Proline-rich EVH1 ligand 2;Protein RMO1;Ras-associated and pleckstrin homology domains-containing protein 1;Putativ…	hCG_2043066;RAPH1;ALS2CR18;ALS2CR9;KIAA1681;LPD;PREL2;RAPH1;RMO1;RAPH1;RAPH1;RAPH1	S17			0.93064	21.75	0.612929	16.77											1	HGAEEDSDKEDQD	GO:0005856	GO:0005543	GO:0007160;GO:0007165	n/a	n/a	0.93064	21.753	7	0.5965	8.006	7	0.65861	16.768	7
C9K0J5	Putative uncharacterized protein RAPH1;Ras association (RalGDS/AF-6) and pleckstrin homology domains 1, isoform CRA_b;Amyotrophic lateral sclerosis 2 chromosomal region candidate gene 18 protein;Amyotrophic lateral sclerosis 2 chromosomal region candidate gene 9 protein;Lamellipodin;Proline-rich EVH1 ligand 2;Protein RMO1;Ras-associated and pleckstrin homology domains-containing protein 1;Putativ…	hCG_2043066;RAPH1;ALS2CR18;ALS2CR9;KIAA1681;LPD;PREL2;RAPH1;RMO1;RAPH1;RAPH1;RAPH1	S5			0.93064	21.75	0.612929	16.77											1	__MEQISDEEIDH	GO:0005856	GO:0005543	GO:0007160;GO:0007165	n/a	n/a	0.93064	21.753	7	0.5965	8.006	7	0.65861	16.768	7
D3DQV9	Eukaryotic translation initiation factor 4 gamma, 2, isoform CRA_b;Death-associated protein 5;Eukaryotic translation initiation factor 4 gamma 2;p97	EIF4G2;hCG_1991788;DAP5;EIF4G2;OK/SW-cl.75	S395	0.739278		0.52074	17.49	0.751897	15.94	0.168288										0.778549	VIQDRFSPTMGRH		GO:0003743	GO:0016070	5	n/a
D3DQV9	Eukaryotic translation initiation factor 4 gamma, 2, isoform CRA_b;Death-associated protein 5;Eukaryotic translation initiation factor 4 gamma 2;p97	EIF4G2;hCG_1991788;DAP5;EIF4G2;OK/SW-cl.75	T508			0.82232	34.53	1.13891	55.94			0.807557	13.08	0.76936	3.97	0.909076	18.22	0.850374	9.24	0.982215	QPPRTQTPPIGQT		GO:0003743	GO:0016070	n/a	0	0.82232	34.531	5	1.135	24.22	5	1.385	55.943	5										0.76936	3.9657	4	0.97924	12.584
D3K174	Solute carrier family 4 sodium bicarbonate cotransporter member 7;Solute carrier family 4 sodium bicarbonate cotransporter member 7;Putative uncharacterized protein SLC4A7;Solute carrier family 4 sodium bicarbonate cotransporter member 7;Sodium bicarbonate cotransporter 2;Sodium bicarbonate cotransporter 2b;Sodium bicarbonate cotransporter 3;Solute carrier family 4 member 7;Solute carrier family …	SLC4A7;SLC4A7;SLC4A7;BT;NBC2;NBC2B;NBC3;SBC2;SLC4A6;SLC4A7;SLC4A7	S1061	1.16057	56.24	0.89425	16.65	1.05691	7.19	0.78508	47.73	0.642108	49.52	0.53887	37.27	0.414493	24.72	0.626544	15.1	0.999996	IPFEGGSIIQIPV	GO:0016021	GO:0005452		0	1	0.89425	16.646	8	1.1219	9.6163	8	1.1819	7.1856	8	0.58337		1	0.96216		1	1.0016		1	0.53887	37.267	3	0.87515	16.034
D3K174	Solute carrier family 4 sodium bicarbonate cotransporter member 7;Solute carrier family 4 sodium bicarbonate cotransporter member 7;Putative uncharacterized protein SLC4A7;Solute carrier family 4 sodium bicarbonate cotransporter member 7;Sodium bicarbonate cotransporter 2;Sodium bicarbonate cotransporter 2b;Sodium bicarbonate cotransporter 3;Solute carrier family 4 member 7;Putative uncharacteriz…	SLC4A7;SLC4A7;SLC4A7;BT;NBC2;NBC2B;NBC3;SBC2;SLC4A6;SLC4A7;SLC4A7;SLC4A7	S251	1.04118	79.76	1.0442	18.41	1.20323	23.16	1.05976	23.53			0.96149	15.03	1.47752	12.97			1	DIGKKHSDPHIIE	GO:0016021	GO:0005452		0	n/a	1.0442	18.413	15	1.1316	21.629	15	1.1523	23.159	15	1.0029	79.757	26	1.0329	79.266	26	1.0149	23.526	26	0.96149	15.031	4	1.2707	11.555
D3K174	Solute carrier family 4 sodium bicarbonate cotransporter member 7;Solute carrier family 4 sodium bicarbonate cotransporter member 7;Putative uncharacterized protein SLC4A7;Solute carrier family 4 sodium bicarbonate cotransporter member 7;Putative uncharacterized protein SLC4A7;Solute carrier family 4 sodium bicarbonate cotransporter member 7 type 1 variant;Solute carrier family 4 sodium bicarbona…	SLC4A7;SLC4A7;SLC4A7;SLC4A7;SLC4A7	S267			0.75426	12.28	0.463666	48.65			0.892513	23.55	0.65664	23.55	0.848642	27.03	0.908133	37.68	1	IIASPQSAPGNID	GO:0016021	GO:0005452		n/a	0	0.75426	12.28	8	0.43794	28.166	8	0.61473	48.652	8										0.65664	23.545	2	1.1353	21.946
D3K174	Solute carrier family 4 sodium bicarbonate cotransporter member 7;Solute carrier family 4 sodium bicarbonate cotransporter member 7;Putative uncharacterized protein SLC4A7;Solute carrier family 4 sodium bicarbonate cotransporter member 7;Sodium bicarbonate cotransporter 2;Sodium bicarbonate cotransporter 2b;Sodium bicarbonate cotransporter 3;Solute carrier family 4 member 7;Putative uncharacteriz…	SLC4A7;SLC4A7;SLC4A7;BT;NBC2;NBC2B;NBC3;SBC2;SLC4A6;SLC4A7;SLC4A7;SLC4A7;SLC4A7;SLC4A7	S285	1.56834		1.1194	13.12	1.71526	11.23	1.7466		1.58552	23.49	1.3134	22.83	1.27635	39.63	1.64372	11.9	0.79298	EIKGNGSGGSREN	GO:0016021	GO:0005452		0	0	1.1194	13.116	2	1.3706	23.838	2	1.5323	11.227	2	0.71375		1	1.43		1	1.5603		1	1.3134	22.826	8	1.0708	16.246
D3K174	Solute carrier family 4 sodium bicarbonate cotransporter member 7;Solute carrier family 4 sodium bicarbonate cotransporter member 7;Putative uncharacterized protein SLC4A7;Solute carrier family 4 sodium bicarbonate cotransporter member 7;Sodium bicarbonate cotransporter 2;Sodium bicarbonate cotransporter 2b;Sodium bicarbonate cotransporter 3;Solute carrier family 4 member 7;Putative uncharacteriz…	SLC4A7;SLC4A7;SLC4A7;BT;NBC2;NBC2B;NBC3;SBC2;SLC4A6;SLC4A7;SLC4A7;SLC4A7;SLC4A7;SLC4A7	S441	1.40921	35.23	0.90286	30.63	1.11007	36.1	0.356029	65.54	1.05908	22.41	1.01099	17.94	1.5407	17.18	1.07933	6.2	0.996059	PVFHNGSTPTIGE	GO:0016021	GO:0005452		5	0	0.90286	30.633	4	1.2618	24.927	4	1.2295	36.101	4	0.70697	35.231	4	0.7055	70.779	4	0.6519	65.537	4	1.1945	17.936	7	1.1309	27.554
D3K174	Solute carrier family 4 sodium bicarbonate cotransporter member 7;Solute carrier family 4 sodium bicarbonate cotransporter member 7;Putative uncharacterized protein SLC4A7;Solute carrier family 4 sodium bicarbonate cotransporter member 7;Sodium bicarbonate cotransporter 2;Sodium bicarbonate cotransporter 2b;Sodium bicarbonate cotransporter 3;Solute carrier family 4 member 7;Putative uncharacteriz…	SLC4A7;SLC4A7;SLC4A7;BT;NBC2;NBC2B;NBC3;SBC2;SLC4A6;SLC4A7;SLC4A7;SLC4A7;SLC4A7;SLC4A7	T442	1.28737	40.26	0.85344		0.988113		0.372902	39.07	1.18709	119.54	0.91167	28.57	1.32173	22.1	0.929448	23.28	0.996059	VFHNGSTPTIGET	GO:0016021	GO:0005452		5	0	0.85344		1	1.1037		1	1.1578		1	0.75147	40.258	7	0.78506	29.454	7	0.73711	39.07	7	0.99586	28.57	37	0.98307	20.948
D3K174	Solute carrier family 4 sodium bicarbonate cotransporter member 7;Solute carrier family 4 sodium bicarbonate cotransporter member 7;Putative uncharacterized protein SLC4A7;Solute carrier family 4 sodium bicarbonate cotransporter member 7;Sodium bicarbonate cotransporter 2;Sodium bicarbonate cotransporter 2b;Sodium bicarbonate cotransporter 3;Solute carrier family 4 member 7;Putative uncharacteriz…	SLC4A7;SLC4A7;SLC4A7;BT;NBC2;NBC2B;NBC3;SBC2;SLC4A6;SLC4A7;SLC4A7;SLC4A7;SLC4A7;SLC4A7	T444	1.33083		0.76443	5.54	0.832464	14.47	0.104551		0.787656		0.92014		1.37989		0.76609		0.876768	HNGSTPTIGETPK	GO:0016021	GO:0005452		5	0	0.76443	5.5369	2	0.98064	3.5155	2	1.089	14.467	2										1.0128		1	0.9182
D3YTH2	Putative uncharacterized protein DOCK9;Putative uncharacterized protein DOCK9;Cdc42 guanine nucleotide exchange factor zizimin-1;Dedicator of cytokinesis protein 9;cDNA FLJ45400 fis, clone BRHIP3028570	DOCK9;DOCK9;DOCK9;KIAA1058	S1272	1.16113	31.77	1.049	0.92	0.997054	19	0.831584	20.62	1.24108		1.0438	22.78	1.00477	11.25	1.08712		0.874628	ERNSEKSNSIDKH		GO:0005525;GO:0051020;GO:0005085;GO:0005543		0	0	1.049	0.92027	3	0.99007	8.4693	3	0.95048	18.998	3	0.90343	31.769	4	0.94188	10.81	4	0.79274	20.62	4	1.0438	22.78	11	1.1167	26.268
D4PHA4	GC-rich promoter binding protein 1, isoform CRA_c;Putative uncharacterized protein GPBP1;GC-rich promoter-binding protein 1;Vascular wall-linked protein;Vasculin	GPBP1;hCG_40617;GPBP;GPBP1;SSH6	S342	1.19962	12.42	1.5937		0.830413		1.15577	30.06			1.0215	5.13	1.16339	21.03			0.999903	DESRAGSEKDDDS				0	n/a	1.5937		1	1.0433		1	0.52106		1	1.3285	12.421	4	0.94188	44.922	4	0.72521	30.057	4	1.0215	5.1328	4	1.096	14.49
D4PHA4	GC-rich promoter binding protein 1, isoform CRA_c;Putative uncharacterized protein GPBP1;GC-rich promoter-binding protein 1;Vascular wall-linked protein;Vasculin	GPBP1;hCG_40617;GPBP;GPBP1;SSH6	S49	0.873492	19.44	0.91507		0.776592		0.809151	20.73	0.604443		0.80397	40.24	0.713523	18.22	0.389909		0.871163	NRRRHNSSDGFDS				0	3	0.91507		1	1.0074		1	0.84867		1	1.0476	19.442	6	1.1345	15.395	6	0.88425	20.734	6	0.80397	40.243	10	0.80689	21.298
D6RER5	Septin-11	2011-09-01	S9	1.25476		1.2643	6.91	0.611504	13.58	1.41994										1	VAVGRPSNEEIRN	GO:0031105	GO:0005525	GO:0007049	0	n/a
D6REX3	ABP125;ABP130;Protein transport protein Sec31A;SEC31-like protein 1;SEC31-related protein A;Web1-like protein	HSPC275;HSPC334;KIAA0905;SEC31A;SEC31L1	S527	0.951416	15.97	0.83776	35.59	0.665282	12.39	0.656737	15	0.515854	29.2	0.53556	45.5	0.621464	19.38	0.572353	18.59	0.994945	SDQVAQSDGEESP	GO:0005737;GO:0043231			0	0	0.83776	35.588	23	0.7208	15.501	23	0.79412	12.391	23	0.88054	15.969	18	0.7569	19.523	18	0.78392	15.001	18	0.53556	45.495	8	0.71763	13.872
D6REX3	ABP125;ABP130;Protein transport protein Sec31A;SEC31-like protein 1;SEC31-related protein A;Web1-like protein;SEC31A protein	HSPC275;HSPC334;KIAA0905;SEC31A;SEC31L1;SEC31A	S799	1.80732	27.03	0.82988	40.72	9.81803	256.32	0.939217	21.65	0.603737	29.6	0.713345	55.26	0.846897	33.085	0.655418	42.16	0.996162	PVAGHESPKIPYE	GO:0005737;GO:0043231			3	0	0.93233	14.571	74	0.85428	57.893	74	0.96332	40.67	74	0.91534	27.034	40	0.97829	17.047	40	1.125	21.653	40	0.73658	28.456	32	0.93286	40.758
E2QRG5	Differentiation-dependent gene 2 protein;Immediate early protein GLY96;Immediate early response 3 protein;PACAP-responsive gene 1 protein;Radiation-inducible immediate-early gene IEX-1;Immediate early response 3;Immediate early response 3, isoform CRA_b	DIF2;IER3;IEX1;PRG1;DADB-118P11.5-002;DAMA-63A3.2-002;DAQB-47P19.3-002;DASS-191K16.5-002;hCG_26002;IER3;XXbac-BCX111D4.5-002;XXbac-BPG252P9.5-002	T37																	0.970352	SGPEIFTFDPIPE			GO:0006916	n/a	n/a										0.66618		1	0.86633		1	1.0781		1
E2QRI7	Nuclear factor 1;CCAAT-box-binding transcription factor;Nuclear factor 1 A-type;Nuclear factor I/A;TGGCA-binding protein;Nuclear factor 1	NFIA;RP5-902P15.1-002;KIAA1439;NFIA;NFIA;RP5-902P15.1-005	S345	0.94058		0.71185	18.46	0.647577	25.43	0.776842		0.820656	22.87	0.75978	27.18	1.03611	19.2	0.989613	8.83	0.990969	YTGQGRSPGSGSQ	GO:0005634	GO:0003677;GO:0003700	GO:0006260;GO:0006351	0	0	0.71185	18.462	9	0.71236	18.828	9	0.90971	25.427	9	0.75682		1	0.96296		1	1.0913		1	0.75978	27.184	3	0.90534	8.941
E5RJR5	Cyclin-A/CDK2-associated protein p19;Organ of Corti protein 2;Organ of Corti protein II;p19A;p19skp1;RNA polymerase II elongation factor-like protein;SIII;S-phase kinase-associated protein 1;Transcription elongation factor B	EMC19;OCP2;SKP1;SKP1A;TCEB1L	T131	1.09623	36.76	1.2406	34.08	0.924433	33.63	1.45262	40.23	0.823769	37.74	0.75346	100.68	1.25361	40.54	0.838074	40.43	1	NMIKGKTPEEIRK			GO:0006511	0	0	1.2406	34.083	13	1.0378	41.89	13	0.74515	33.632	13	1.1317	36.759	17	1.6472	37.449	17	1.1709	40.228	17	0.75346	100.68	6	1.2984	17.404
E7ENA8	Androgen-induced proliferation inhibitor;Androgen-induced prostate proliferative shutoff-associated protein AS3;Sister chromatid cohesion protein PDS5 homolog B;cDNA FLJ61699, highly similar to Homo sapiens androgen-induced proliferation inhibitor (APRIN), transcript variant 1, mRNA;PDS5, regulator of cohesion maintenance, homolog B (S. cerevisiae)	APRIN;AS3;KIAA0979;PDS5B;PDS5B;RP1-267P19.1-012	S1078											1.0534		1.20846				0.999997	AMNIIMSKSTTYS	GO:0005634	GO:0003677		n/a	n/a																			1.0534		1	1.0064
E7ENA8	Androgen-induced proliferation inhibitor;Androgen-induced prostate proliferative shutoff-associated protein AS3;Sister chromatid cohesion protein PDS5 homolog B;cDNA FLJ61699, highly similar to Homo sapiens androgen-induced proliferation inhibitor (APRIN), transcript variant 1, mRNA;PDS5, regulator of cohesion maintenance, homolog B (S. cerevisiae)	APRIN;AS3;KIAA0979;PDS5B;PDS5B;RP1-267P19.1-012	S1166									1.56051	14.94	1.433		1.03255		1.36369	14.7	0.969507	SSSNPSSPGRIKG	GO:0005634	GO:0003677		n/a	0										0.8804	23.844	3	0.71228	41.871	3	1.0156	10.547	3	1.433		1	0.94899
E7ENA8	Androgen-induced proliferation inhibitor;Androgen-induced prostate proliferative shutoff-associated protein AS3;Sister chromatid cohesion protein PDS5 homolog B;cDNA FLJ61699, highly similar to Homo sapiens androgen-induced proliferation inhibitor (APRIN), transcript variant 1, mRNA;PDS5, regulator of cohesion maintenance, homolog B (S. cerevisiae)	APRIN;AS3;KIAA0979;PDS5B;PDS5B;RP1-267P19.1-012	S1182	1.10895	23.51	1.0491	21.3	1.07732	20.01	0.918099	25.21	0.857221	24.38	0.98589	20.29	1.07758	21.47	1.06328	22.9	0.943818	SSEMDHSENEDYT	GO:0005634	GO:0003677		0	0	1.0491	21.297	33	1.0794	19.316	33	1.0269	20.012	33	0.94603	23.511	13	0.87213	19.455	13	0.87513	25.209	13	0.98589	20.294	31	1.0352	19.797
E7ENA8	Androgen-induced proliferation inhibitor;Androgen-induced prostate proliferative shutoff-associated protein AS3;Sister chromatid cohesion protein PDS5 homolog B;cDNA FLJ61699, highly similar to Homo sapiens androgen-induced proliferation inhibitor (APRIN), transcript variant 1, mRNA;PDS5, regulator of cohesion maintenance, homolog B (S. cerevisiae)	APRIN;AS3;KIAA0979;PDS5B;PDS5B;RP1-267P19.1-012	S1257	0.921853	33.03	1.1006	21.91	1.08749	23.29	0.951028	16.565	0.962666	21.32	0.91009	36.4	0.755488	18.375	0.491307	41.2	0.998473	KRGHTASESDEQQ	GO:0005634	GO:0003677		0	5	1.1316	23.398	47	1.136	27.05	47	0.99175	33.732	47	1.0764	35.832	21	1.0179	38.285	21	0.94736	20.158	21	0.95026	51.569	29	0.78287	25.747
E7ENA8	Androgen-induced proliferation inhibitor;Androgen-induced prostate proliferative shutoff-associated protein AS3;Sister chromatid cohesion protein PDS5 homolog B;PDS5, regulator of cohesion maintenance, homolog B (S. cerevisiae)	APRIN;AS3;KIAA0979;PDS5B;PDS5B;RP1-267P19.1-012	S1283	1.03024	38.74	0.898515	20.36	0.824702	30.58	0.918633	24.21	0.880597	31.27	0.830355	47.19	0.880135	33.615	0.836936	16.31	1	NEDEQNSPPKKGK	GO:0005634	GO:0003677		0	0	0.9643	21.128	113	0.9668	24.493	113	1.0567	25.738	113	0.9799	33.955	119	0.98088	37.684	119	1.0647	22.569	119	0.9315	31.149	130	0.93943	34.516
E7ENA8	Androgen-induced proliferation inhibitor;Androgen-induced prostate proliferative shutoff-associated protein AS3;Sister chromatid cohesion protein PDS5 homolog B	APRIN;AS3;KIAA0979;PDS5B	S1359	1.17102	16.285	0.989955	12.455	0.971181	57.99	1.07135	17.385	0.959211	10.355	0.860945	19.3	0.889989	25.06	0.95849	10.425	0.999999	AQQRAESPESSAI	GO:0005634	GO:0003677		0	0	1.075	7.825	7	0.90967	15.308	7	0.89427	21.643	7	0.76004	17.051	2	0.6688	8.6462	2	0.80774	13.88	2	0.83619	16.297	8	0.93007	22.66
E7ENA8	Androgen-induced proliferation inhibitor;Androgen-induced prostate proliferative shutoff-associated protein AS3;Sister chromatid cohesion protein PDS5 homolog B	APRIN;AS3;KIAA0979;PDS5B	S1384	1.00196	16.71	0.95034	28.4	1.38778	36.55	1.00784	37.34	0.961897	17.93	1.0123	22.32	0.788855	44.47	1.0701	30.83	0.987413	RPSKTPSPSQPKK	GO:0005634	GO:0003677		0	0	0.95034	28.398	7	1.2505	34.297	7	1.4603	36.551	7	0.94848	16.706	13	0.92974	53.138	13	1.0605	37.343	13	1.0123	22.323	24	1.063	48.503
E7ENA8	Androgen-induced proliferation inhibitor;Androgen-induced prostate proliferative shutoff-associated protein AS3;Sister chromatid cohesion protein PDS5 homolog B;cDNA FLJ61699, highly similar to Homo sapiens androgen-induced proliferation inhibitor (APRIN), transcript variant 1, mRNA;PDS5, regulator of cohesion maintenance, homolog B (S. cerevisiae)	APRIN;AS3;KIAA0979;PDS5B;PDS5B;RP1-267P19.1-012	T1220	1.09914	26.05	1.1042	44.91	1.15013	49.17	1.26795	17.13			0.99352	37.79	1.426	5.9			0.996216	PRGRKKTPVTEQE	GO:0005634	GO:0003677		0	n/a	1.1042	44.906	6	1.2055	37.662	6	1.0416	49.166	6	1.0046	26.046	4	0.87395	42.351	4	1.1483	17.134	4	0.99352	37.793	5	1.1426	42.144
E7ENA8	Androgen-induced proliferation inhibitor;Androgen-induced prostate proliferative shutoff-associated protein AS3;Sister chromatid cohesion protein PDS5 homolog B;cDNA FLJ61699, highly similar to Homo sapiens androgen-induced proliferation inhibitor (APRIN), transcript variant 1, mRNA;PDS5, regulator of cohesion maintenance, homolog B (S. cerevisiae)	APRIN;AS3;KIAA0979;PDS5B;PDS5B;RP1-267P19.1-012	T1255	1.42271		1.2274	16.62	1.10526	5.67	1.33443				1.1543		0.937499				0.391974	SRKRGHTASESDE	GO:0005634	GO:0003677		0	n/a	1.2274	16.623	2	1.0604	20.242	2	0.90049	5.6712	2	0.86272		1	0.93054		1	1.0872		1	1.1543		1	0.90106
E7ENA8	Androgen-induced proliferation inhibitor;Androgen-induced prostate proliferative shutoff-associated protein AS3;Sister chromatid cohesion protein PDS5 homolog B;PDS5, regulator of cohesion maintenance, homolog B (S. cerevisiae)	APRIN;AS3;KIAA0979;PDS5B;PDS5B;RP1-267P19.1-012	T1301	0.968627	9.34	0.80428	14.34	1.17095	18.5	1.06543	23.6			0.60547	9.79	0.75938	12.61			1	KPIGGGTPKEEPT	GO:0005634	GO:0003677		0	n/a	0.80428	14.336	7	1.1246	21.931	7	1.4559	18.496	7	0.83033	9.3394	16	1.1239	24.358	16	1.3247	23.6	16	0.60547	9.7869	2	0.83517	0.75576
E7ENA8	Androgen-induced proliferation inhibitor;Androgen-induced prostate proliferative shutoff-associated protein AS3;Sister chromatid cohesion protein PDS5 homolog B	APRIN;AS3;KIAA0979;PDS5B	T1371	1.13685	12.04	1.02503	17.84	1.0354	28.65	1.24279	13.22	0.910253	5.215	0.93787	19.865	0.761696	17.17	0.673067	13.61	0.965738	IESTQSTPQKGRG	GO:0005634	GO:0003677		0	0	0.93885	17.841	9	0.98487	10.91	9	1.0587	28.646	9	0.93541	12.042	6	1.075	9.5517	6	1.1255	13.222	6	0.99819	6.8378	5	0.82948	3.8195
E7ENA8	Androgen-induced proliferation inhibitor;Androgen-induced prostate proliferative shutoff-associated protein AS3;Sister chromatid cohesion protein PDS5 homolog B	APRIN;AS3;KIAA0979;PDS5B	T1382	1.04913	16.49	0.99508	21.53	1.41053	27.57	1.05528	39.08	1.01461	27.17	0.9998	41.31	0.761818	51.2	0.981594	45.22	0.960871	RGRPSKTPSPSQP	GO:0005634	GO:0003677		0	0	0.99508	21.526	13	1.1794	24.504	13	1.4175	27.57	13	0.94848	16.488	19	0.92974	44.19	19	1.0605	39.078	19	0.9998	41.308	27	1.0976	48.887
E7ENH9	ATP-citrate (pro-S-)-lyase;ATP-citrate synthase;Citrate cleavage enzyme;cDNA FLJ55447, highly similar to ATP-citrate synthase (EC 2.3.3.8)	ACLY	S509	0.8711	25.39	1.1502	34.84	0.94719	41.49	1.13399	39.56	0.62619	13.23	0.63959	34.1	0.285065	76.29	0.819379	14.84	0.999491	APSRTASFSESRA	GO:0005737;GO:0005634;GO:0005886	GO:0005524;GO:0003878;GO:0004775	GO:0044262	0	6	1.1502	34.835	17	1.0178	17.946	17	0.8235	41.486	17	1.3204	25.385	8	1.5033	30.042	8	0.98591	39.563	8	0.63959	34.103	15	0.7387	68.15
E7ENH9	ATP-citrate (pro-S-)-lyase;ATP-citrate synthase;Citrate cleavage enzyme	ACLY	S535	1.11329	16.23	0.875795	8.885	0.728158	23.705	0.895457	26.72	0.688959	24.65	0.79118	16.545	0.848865	9.795	0.733107	15.2	0.999996	PQDSVPSPRSIQG	GO:0005737;GO:0005634;GO:0005886	GO:0005524;GO:0003878;GO:0004775	GO:0044262	0	0	0.93372	11.161	12	0.65281	21.723	12	0.82732	16.498	12	0.73548	7.8829	2	0.72434	21.153	2	1.0055	13.492	2	0.50146	16.991	5	0.54174	28.186
E7ENI0	MAX dimerization protein 5;MAX gene-associated protein	KIAA0518;MAD5;MGA	S924																	0.999911	IIPYPVSPKQKYS		GO:0003677;GO:0003700	GO:0006351	n/a	n/a
E7ENI9	BS69 variant 4;Zinc finger, MYND domain containing 11, isoform CRA_b;Adenovirus 5 E1A-binding protein;Protein BS69;Zinc finger MYND domain-containing protein 11;Zinc finger, MYND domain containing 11;cDNA FLJ50487, highly similar to Mus musculus zinc finger, MYND domain containing 11 (Zmynd11), mRNA;ZMYND11 protein;Zinc finger, MYND domain containing 11;cDNA FLJ50414, highly similar to Zinc finge…	hCG_23206;ZMYND11;BS69;ZMYND11;RP11-486H9.1-002;ZMYND11;ZMYND11;RP11-486H9.1-004;ZMYND11	S349																	0.282454	EAESSISSTSNEQ	GO:0005634	GO:0008270		n/a	n/a
E7EP74	372 kDa Golgi complex-associated protein;Giantin;Golgin subfamily B member 1;Macrogolgin	GOLGB1	S138	0.906239	43.5	1.0255	24.39	1.18353	47.33	0.670349	35.48	1.44165		1.8802	29.59	1.40641	197.79	2.20002		0.917363	ISKHDKSSTEEEM	GO:0005794			0	4	1.0255	24.391	5	1.6441	28.897	5	1.1541	47.33	5	1.1316	43.496	3	0.79284	54.39	3	0.65368	35.477	3	1.8802	29.586	3	1.3644	106.5
E7EP74	372 kDa Golgi complex-associated protein;Giantin;Golgin subfamily B member 1;Macrogolgin	GOLGB1	S543																	0.410471	IANKRSSSAEESG	GO:0005794			n/a	n/a
E7EP74	372 kDa Golgi complex-associated protein;Giantin;Golgin subfamily B member 1;Macrogolgin	GOLGB1	S544																	0.410471	ANKRSSSAEESGQ	GO:0005794			n/a	n/a
E7EPL3	C-myc promoter-binding protein;DENN domain-containing protein 4A	DENND4A;IRLB;MYCPBP	S1058	1.26854	25.48	1.157		1.09809		1.20987	31.36			0.72557		0.824393				0.81269	FRKRHKSDNETNI				0	n/a	1.157		1	0.99186		1	0.94908		1	0.91207	25.483	6	0.98233	31.388	5	1.0457	31.358	6	0.72557		1	0.80199
E7EQZ4	Component of gems 1;Gemin-1;Survival motor neuron protein;cDNA FLJ60754, moderately similar to Survival motor neuron protein	SMN;SMN1;SMN2;SMNC;SMNT	S28	1.00466	18.46	1.0396	3.89	0.996498	29.285	1.00414	23.645	0.831396	33.76	1.00653	19.07	1.01256	28.045	0.974527	17.16	0.999987	RRGTGQSDDSDIW	GO:0005737;GO:0005634	GO:0003723	GO:0006397	0	0	1.0655	0.32034	2	0.99532	5.3726	2	0.99532	13.158	2	0.96495	27.52	2	1.1219	15.83	2	0.90329	36.647	2	0.92456	8.932	2	1.0167	25.075
E7EQZ4	Component of gems 1;Gemin-1;Survival motor neuron protein;cDNA FLJ60754, moderately similar to Survival motor neuron protein	SMN;SMN1;SMN2;SMNC;SMNT	S31	1.17975	30.325	1.05595	18.415	1.03968	33.295	1.07766	19.605	0.98265	20.63	1.07665	18.48	1.16419	17.855	0.895967	8.935	1	TGQSDDSDIWDDT	GO:0005737;GO:0005634	GO:0003723	GO:0006397	0	0	1.1021	20.342	32	0.9693	38.49	32	0.93789	50.118	32	0.80383	22.293	3	0.91449	21.706	3	0.92802	23.751	3	1.0451	29.71	7	1.2179	18.457
E7EQZ4	Component of gems 1;Gemin-1;Survival motor neuron protein;cDNA FLJ60754, moderately similar to Survival motor neuron protein	SMN;SMN1;SMN2;SMNC;SMNT	T25	1.07794	27.87	1.07395	13.46	1.03116	11.7	0.939567	32.42	0.82895	12.99	0.961085	13.99	0.885366	33.32	0.663427	55.32	0.999998	VIFRRGTGQSDDS	GO:0005737;GO:0005634	GO:0003723	GO:0006397	0	0	1.0882	13.462	23	1.0405	19.148	23	1.0336	11.696	23	0.9963	27.872	7	0.9063	29.604	7	0.87487	32.416	7	1.0131	13.989	9	1.0512	15.997
E7ER66	Centrosomal protein of 152 kDa	CEP152;KIAA0912	S1461	1.06383	14.36	0.99132	23.45	0.802206	21.99	0.631927	22.63	1.30748	29.38	1.1442	13.62	1.02241	17.13	0.813252	17.76	1	SIPRNVSPEFVPC	GO:0005813;GO:0005634			0	0	0.99132	23.453	11	0.90463	33.757	11	0.80923	21.989	11	0.93184	14.356	4	0.8116	20.986	4	0.63746	22.63	4	1.1442	13.621	7	1.0146	11.355
E7ER94	nPKC-D2;Serine/threonine-protein kinase D2	HSPC187;PKD2;PRKD2	S200	0.817204		1.1628		0.828855		1.12303		0.56136		0.84232	54.98	0.638192	36.31	0.84232		0.561884	RRISSTSIASGHS		GO:0005524;GO:0046872;GO:0005543;GO:0004697	GO:0035556	0	0	1.1628		1	1.1576		1	0.71281		1	1.4229		1	1.2699		1	0.9658		1	0.84232	54.976	4	0.83661	25.645
E7ERS3	Nuclear protein NHN1;Zinc finger CCCH domain-containing protein 18	NHN1;ZC3H18	S118	0.741292	42.18	1.1705	15.8	1.37452	62	0.613049	16.42									0.82305	IRDEASSVTREID	GO:0005634			0	n/a	1.1705	15.799	6	1.2436	86.254	6	1.1743	61.997	6	1.579	42.179	3	1.0059	1.8175	3	0.52375	16.421	3
E7ERS3	Nuclear protein NHN1;Zinc finger CCCH domain-containing protein 18	NHN1;ZC3H18	S34	0.977249	13.15	1.0352		0.940924		0.845831	13.84	1.31956	15.67	1.1652	22.26	1.01363	18.9	0.949848	16.86	0.565279	IIRDSGSDQDIDG	GO:0005634			0	0	1.0352		1	0.90152		1	0.90893		1	1.0593	13.154	4	0.90186	18.065	4	0.81707	13.843	4	1.1652	22.257	4	1.1182	9.2754
E7ERS3	Nuclear protein NHN1;Zinc finger CCCH domain-containing protein 18	NHN1;ZC3H18	S46	0.798574	37.15	1.0304	17.22	0.76211	16.98	0.713057	19.29	1.19823	15.13	1.2071	22.25	1.05855	19.76	1.08064	18.46	1	GAGVRASDIEDEE	GO:0005634			0	0	1.2096	17.219	24	1.0026	20.563	24	0.91232	16.98	24	1.2903	37.153	10	0.94072	12.858	10	0.69202	19.294	10	1.2071	22.245	14	1.0288	42.012
E7ERS3	Nuclear protein NHN1;Zinc finger CCCH domain-containing protein 18	NHN1;ZC3H18	S556	0.902429		1.0701	16.01	1.50617	15.11	1.2517		0.8929		1.1651	11.35	1.21708	3.65	1.00395		0.999998	KKKIGVSVSPSRA	GO:0005634			0	0	1.0282	23.335	16	1.3757	23.886	16	1.1752	13.733	16	1.1858		1	1.2349		1	1.1697		1	1.2589	11.351	3	1.3728	1.1934
E7ERS3	Nuclear protein NHN1;Zinc finger CCCH domain-containing protein 18	NHN1;ZC3H18	S558	1.00391	16.055	1.09755	33.49	1.18173	27.325	1.14247	17.925	1.02896	14.995	1.06585	18.555	1.08048	19.44	1.22066	11.39	0.999943	KIGVSVSPSRARR	GO:0005634			0	0	1.1286	61.884	12	1.2234	68.189	12	1.0462	21.11	12	0.97855	16.052	8	1.0642	14.292	8	1.1434	11.121	8	1.1294	31.663	14	1.2194	30.022
E7ERS3	Nuclear protein NHN1;Zinc finger CCCH domain-containing protein 18	NHN1;ZC3H18	S59	1.1747	29.16	0.99421		1.01966		0.705571	22.92	1.0237	8.18	0.9913	8.95	0.566597	24.62	0.71213	10.23	0.587288	SAARGPSQEEEDN	GO:0005634			0	0	0.99421		1	0.91582		1	1.0256		1	0.84635	29.159	4	0.82983	18.762	4	0.70968	22.918	4	0.9913	8.946	4	0.74433	39.559
E7ERS3	Nuclear protein NHN1;Zinc finger CCCH domain-containing protein 18	NHN1;ZC3H18	S617			1.1523		1.44061												0.510596	SRHSSFSGSRSRS	GO:0005634			n/a	n/a	1.1523		1	1.2965		1	1.2502		1
E7ERS3	Nuclear protein NHN1;Zinc finger CCCH domain-containing protein 18	NHN1;ZC3H18	S619	1.04586	15.84	1.3228	1.61	1.5236	1.47	1.49529	26									0.510596	HSSFSGSRSRSRS	GO:0005634			0	n/a	1.3228	1.6062	2	1.3669	13.562	2	1.1518	1.4669	2	1.2648	15.835	3	1.3559	13.718	3	1.1304	25.998	3
E7ERS3	Nuclear protein NHN1;Zinc finger CCCH domain-containing protein 18	NHN1;ZC3H18	S621	2.05753	40.77	1.1652	13.71	1.28149	41.88	0.628148	111.2									0.978763	SFSGSRSRSRSFS	GO:0005634			5	n/a	1.1652	13.711	6	1.3424	11.832	6	1.0998	41.882	6	0.56631	40.772	3	1.4458	15.042	3	0.53909	111.2	3
E7ERS3	Nuclear protein NHN1;Zinc finger CCCH domain-containing protein 18	NHN1;ZC3H18	S633																	0.539453	SSSPSPSPTPSPH	GO:0005634			n/a	n/a										0.60761	18.394	2	0.8532	6.2182	2	0.96882	14.273	2
E7ERS3	Nuclear protein NHN1;Zinc finger CCCH domain-containing protein 18	NHN1;ZC3H18	S74	0.944011	20.27	0.84944	14.27	0.600749	22.56	0.620575	24.96	0.98149	24.17	0.94647	22.17	0.734906	35.94	0.73165	34.2	1	DEEDRASEPKSQD	GO:0005634			0	0	0.84944	14.274	18	0.56266	23.991	18	0.70723	22.563	18	0.89982	20.271	27	0.70715	23.295	27	0.73057	24.963	27	0.94647	22.172	28	0.80616	39.996
E7ERS3	Nuclear protein NHN1;Zinc finger CCCH domain-containing protein 18	NHN1;ZC3H18	S819											0.72911		0.883827				0.498565	KSSQQPSTPQQAP	GO:0005634			n/a	n/a																			0.72911		1	0.78107
E7ERS3	Nuclear protein NHN1;Zinc finger CCCH domain-containing protein 18	NHN1;ZC3H18	S83	0.824208		0.7248	18.8	0.533431	22.57	0.440338		1.21044	13.25	1.1191	3.47	0.97759	15.27	1.14618	8.51	1	KSQDQDSEVNEIS	GO:0005634			2	0	0.7248	18.796	3	0.76814	36.343	3	0.73597	22.567	3	0.87939		1	0.58293		1	0.60753		1	1.1191	3.4664	2	0.87284	26.75
E7ERS3	Nuclear protein NHN1;Zinc finger CCCH domain-containing protein 18	NHN1;ZC3H18	S866	1.04105	14.93	0.92002	15.81	1.13889	14.76	1.05508	29.96	1.09388	11.9	0.97903	19.52	0.998219	24.23	1.11492	11.99	0.999845	SDKDRQSPPPAKR	GO:0005634			0	0	0.92002	15.812	16	0.99249	13.472	16	1.2379	14.76	16	0.88374	14.925	25	0.96779	14.88	25	1.1468	29.959	25	0.97903	19.52	25	0.95384	13.688
E7ERS3	Nuclear protein NHN1;Zinc finger CCCH domain-containing protein 18	NHN1;ZC3H18	S876	1.00257	4.93	0.99338		0.965257		0.939946	7.99	1.11741	7.54	1.0941	4.57	1.12309	1.57	1.10767	7.3	0.777357	AKRPNTSPDRGSR	GO:0005634			0	0	0.99338		1	0.97461		1	0.97169		1	0.99083	4.929	10	0.95734	10.49	10	0.94621	7.9928	10	1.0941	4.5734	2	1.0528	0.59448
E7ERS3	Nuclear protein NHN1;Zinc finger CCCH domain-containing protein 18	NHN1;ZC3H18	S881	0.973909	12.1	0.9048		1.04459		1.04767	49.37	1.07041	27.33	1.0315	8.36	0.980802	8.43	0.847439	7.41	1	TSPDRGSRDRKSG	GO:0005634			0	0	0.9048		1	0.96507		1	1.1545		1	0.92904	12.095	3	1.0308	11.006	3	1.1579	49.368	3	1.0315	8.3576	9	0.98626	9.9784
E7ERS3	Nuclear protein NHN1;Zinc finger CCCH domain-containing protein 18	NHN1;ZC3H18	T162			0.4616		0.634192												1	EEKGEGTPREEGK	GO:0005634			n/a	n/a	0.4616		1	0.87893		1	1.3739		1
E7ERS3	Nuclear protein NHN1;Zinc finger CCCH domain-containing protein 18	NHN1;ZC3H18	T820	0.886536	14.79	0.78212	15.94	0.9247	10.66	0.823807	16.64	0.905097	20.35	0.65024	22.68	0.656157	6.05	0.611005	13.38	0.761506	SSQQPSTPQQAPP	GO:0005634			0	0	0.78212	15.941	6	1.0377	9.7421	6	1.1823	10.66	6	0.88222	14.792	6	0.93701	11.091	6	1.0533	16.642	6	0.65024	22.681	3	0.7729	10.138
E7ETC3	ATP-binding cassette sub-family A member 2;ATP-binding cassette transporter 2	ABC2;ABCA2;KIAA1062	S1358									1.14829	13.92	1.1136	8.4	1.29846	2.55	1.27318	11.74	0.999954	VSEEDQSIENSEA		GO:0005524;GO:0016887		n/a	0										0.959	8.7126	5	1.0144	22.528	5	1.2204	30.644	5	1.1136	8.4024	2	1.2723	17.046
E7ETC3	ATP-binding cassette sub-family A member 2;ATP-binding cassette transporter 2	ABC2;ABCA2;KIAA1062	S1362									1.14829	13.92	1.1136	8.4	1.29846	2.55	1.27318	11.74	1	DQSIENSEADVKE		GO:0005524;GO:0016887		n/a	0										0.959	8.7126	5	1.0144	22.528	5	1.2204	30.644	5	1.1136	8.4024	2	1.2723	17.046
E7EU22	Centrosome-associated protein 350;Centrosome-associated protein of 350 kDa	CAP350;CEP350;GM133;KIAA0480	S1648			1.2876		1.18288												0.98952	RGHHDDSDEEASP				n/a	n/a	1.2876		1	1.1852		1	0.91867		1
E7EU22	Centrosome-associated protein 350;Centrosome-associated protein of 350 kDa	CAP350;CEP350;GM133;KIAA0480	S1807	1.27141		1.1607	25.54	0.979724	14.19	2.43213		0.790937	4.96	0.88403	48.92	0.656074	102.44	0.797581	9.37	0.65449	SKIDSHSDDDTKD				4	0	1.1607	25.543	3	0.9224	17.266	3	0.84408	14.193	3	0.91292		1	3.4267		1	2.0954		1	0.88403	48.915	2	1.3303	8.5562
E7EUY8	Protein DMR;WD repeat-containing protein 20;Putative uncharacterized protein WDR20;cDNA FLJ33659 fis, clone BRAMY2026300, highly similar to WD repeat protein 20;cDNA FLJ31768 fis, clone NT2RI2007891, highly similar to WD repeat protein 20	WDR20;WDR20	S388	1.0241	5.73	1.0108	6.32	0.907618	38.12	1.08742	2.58	0.867715	0.87	0.92403	23.36	0.833235	19.34	0.745738	7.59	0.904806	RISKRNSTDSRPV				0	0	1.0108	6.3247	5	0.97567	8.8003	5	0.89792	38.122	5	0.98701	5.7288	4	1.0296	8.7684	4	1.0758	2.5812	4	0.92403	23.358	2	0.84291	30.478
E7EUY8	Protein DMR;WD repeat-containing protein 20;Putative uncharacterized protein WDR20;cDNA FLJ33659 fis, clone BRAMY2026300, highly similar to WD repeat protein 20;cDNA FLJ31768 fis, clone NT2RI2007891, highly similar to WD repeat protein 20	WDR20;WDR20	S465	0.952922	7.3	0.99952	18.36	1.07009	27.41	0.983128	29.66			0.68122		0.630599				0.958377	PIPRSNSIPHSAV				0	n/a	0.99952	18.356	8	1.0225	31.798	8	1.0706	27.405	8	1.0489	7.2977	3	1.0194	9.0353	3	0.9836	29.659	3	0.68122		1	0.78694
E7EUY8	Protein DMR;WD repeat-containing protein 20;Putative uncharacterized protein WDR20;cDNA FLJ33659 fis, clone BRAMY2026300, highly similar to WD repeat protein 20;cDNA FLJ31768 fis, clone NT2RI2007891, highly similar to WD repeat protein 20	WDR20;WDR20	S522	0.930644	22.21	1.0614	31.91	1.46887	25.9	1.45709	30.65	0.875909	15.66	0.91804	5.86	1.90989	11.32	1.36916	5.76	0.95742	GHISSKSSDKINI				0	0	1.0614	31.907	9	1.3898	25.943	9	1.3839	25.904	9	1.1405	22.206	10	1.4288	28.167	10	1.3728	30.654	10	0.91804	5.8577	2	1.6641	11.162
E7EUY8	Protein DMR;WD repeat-containing protein 20;Putative uncharacterized protein WDR20;cDNA FLJ33659 fis, clone BRAMY2026300, highly similar to WD repeat protein 20;cDNA FLJ31768 fis, clone NT2RI2007891, highly similar to WD repeat protein 20	WDR20;WDR20	S523	1.30707	36.28	1.2167		2.02909		2.21707	29.69	0.642601	24.84	0.64967		1.297		1.04954	13.23	0.5	HISSKSSDKINIV				4	0	1.2167		1	1.48		1	1.6677		1	0.93086	36.28	2	1.3129	12.388	2	1.8222	29.689	2	0.64967		1	1.508
E7EVA0	Microtubule-associated protein 4;Microtubule-associated protein;Putative uncharacterized protein MAP4	MAP4;MAP4;MAP4	S1934	1.51104	46.61	0.65897	31.26	0.611063	26.29		78.87	0.266811		0.4055		89.8831		0.0682943		0.957226	EKRASPSKPASAP	GO:0005737;GO:0005874;GO:0005886		GO:0007026	4	3	0.65897	31.255	6	0.87789	42.245	6	0.9273	26.29	6	0.85489	46.609	9	0.84592	22.843	9	1.0167	78.867	9
E7EVA0	Microtubule-associated protein 4;Microtubule-associated protein;Putative uncharacterized protein MAP4;Microtubule-associated protein	MAP4;MAP4;MAP4	S2073	2.06028		1.2592		1.69677		1.93766										0.471422	RIATNTSAPDIKN	GO:0005737;GO:0005874;GO:0005886		GO:0007026	4	n/a
E7EVA0	Microtubule-associated protein 4;Microtubule-associated protein;Microtubule-associated protein	MAP4;MAP4	S2086	1.26574	29.15	1.2124	22.34	1.18496	49.56	1.47169	24.23	0.676126	43.77	0.8315	97.68	0.799496	127.83	0.584836	82.52	0.99894	VRSKVGSTENIKH	GO:0005737;GO:0005874;GO:0005886		GO:0007026	0	0	1.1695	36.149	23	1.3257	17.3	23	0.99109	29.442	23	1.1734	27.432	15	1.3044	23.386	15	0.93463	28.479	15	0.67963	69.127	15	1.1996	93.743
E7EVA0	Microtubule-associated protein 4;Microtubule-associated protein;Microtubule-associated protein	MAP4;MAP4	S2218	1.27698	13.485	1.13905	22.955	1.22639	33.44	1.49842	16.505	0.726598	17.165	0.9101	19.095	1.34781	17.285	0.939819	37.875	1	AQAKVGSIDNVGH	GO:0005737;GO:0005874;GO:0005886		GO:0007026	0	0	1.0248	38.879	63	1.1682	41.446	63	1.2285	45.663	63	0.9937	15.684	28	1.2025	12.323	28	1.1641	17.824	28	0.6636	15.749	24	1.2103	23.753
E7EVA0	Microtubule-associated protein;Microtubule-associated protein 4;Microtubule-associated protein	MAP4;MAP4;MAP4	S297	0.733133	11.07	0.723045	13.59	0.628912	47	0.86469	21.28	0.638558	20.485	0.92096	26.05	1.15848	16.02	0.871928	16.795	0.999816	IAKDMESPTKIDV	GO:0005737;GO:0005874;GO:0005886		GO:0007026	0	0	0.18419		1	0.17483		1	0.89459		1										0.81402	22.891	28	1.1936	21.925
E7EVA0	Microtubule-associated protein;Microtubule-associated protein 4	MAP4;MAP4	S375	0.968134	31.91	1.04026	81.105	0.725092	66.36	1.01702	34.72	0.765108	42.58	0.974595	15.89	0.792029	56.515	0.521467	44.47	0.99997	KETERASPIKMDI	GO:0005737;GO:0005874;GO:0005886		GO:0007026	0	0	0.85802	24.061	22	0.85685	55.235	22	1.0481	21.889	22	1.0938	31.914	5	0.96995	27.79	5	0.62442	34.715	5	0.69089	9.7646	2	1.1799	5.1064
E7EVA0	Microtubule-associated protein;Microtubule-associated protein 4	MAP4;MAP4	S653	1.05472	15.34	1.1315	33.95	1.07643	27.05	1.10972	22.69	0.744864	19.56	0.77518	28.3	0.976882	19.55	0.771769	21.74	1	GTGKKCSIPAEED	GO:0005737;GO:0005874;GO:0005886		GO:0007026	0	0	1.1315	33.948	38	1.0499	14.983	38	0.95133	27.046	38	1.0728	15.34	26	1.1666	23.456	26	0.98075	22.686	26	0.77518	28.299	14	0.976	12.695
E7EVA0	Microtubule-associated protein 4;Microtubule-associated protein;Putative uncharacterized protein MAP4;Microtubule-associated protein	MAP4;MAP4;MAP4	T2072			1.1655		1.33543												0.580527	SRIATNTSAPDIK	GO:0005737;GO:0005874;GO:0005886		GO:0007026	n/a	n/a
E7EVA0	Microtubule-associated protein;Microtubule-associated protein 4	MAP4;MAP4	T538	1.23778	2.89	0.818445	12.435	0.638305	13.66	1.1946	11.59	0.825282	6.68	0.89142	3.54	1.17391	3.66	0.943523	9.64	1	AIGKDVTPPPETE	GO:0005737;GO:0005874;GO:0005886		GO:0007026	0	0	0.68734	21.04	10	0.57642	12.674	10	0.88292	16.164	10
E7EVA0	Microtubule-associated protein;Microtubule-associated protein 4	MAP4;MAP4	T588			0.72878	3.59	1.1283	15.35					1.1312		1.36208				0.999964	TIANNVTPAKDVP	GO:0005737;GO:0005874;GO:0005886		GO:0007026	n/a	n/a
E7EVU8	ARF-binding protein 1;E3 ubiquitin-protein ligase HUWE1;HECT, UBA and WWE domain-containing protein 1;Homologous to E6AP carboxyl terminus homologous protein 9;Large structure of UREB1;Mcl-1 ubiquitin ligase E3;Upstream regulatory element-binding protein 1;HECT, UBA and WWE domain containing 1	HSPC272;HUWE1;KIAA0312;KIAA1578;UREB1;HUWE1;RP3-339A18.4-007	S1089																	0.263038	RSHHAASTTTAPT	GO:0005737;GO:0005634	GO:0016881;GO:0005488	GO:0006464	n/a	n/a
E7EVU8	ARF-binding protein 1;E3 ubiquitin-protein ligase HUWE1;HECT, UBA and WWE domain-containing protein 1;Homologous to E6AP carboxyl terminus homologous protein 9;Large structure of UREB1;Mcl-1 ubiquitin ligase E3;Upstream regulatory element-binding protein 1	HSPC272;HUWE1;KIAA0312;KIAA1578;UREB1	S1907	1.15339	15.15	1.19645	8.575	0.956987	9.45	1.12969	22.3	0.815861	11.22	1.2674	7.62	1.25955	3.96	1.15707	8.635	0.999981	RGSGTASDDEFEN	GO:0005737;GO:0005634	GO:0016881;GO:0005488	GO:0006464	0	0	1.0829	4.8024	5	0.78871	12.631	5	0.73549	14.662	5	0.98127		1	0.73592		1	0.87851		1
E7EVU8	ARF-binding protein 1;E3 ubiquitin-protein ligase HUWE1;HECT, UBA and WWE domain-containing protein 1;Homologous to E6AP carboxyl terminus homologous protein 9;Large structure of UREB1;Mcl-1 ubiquitin ligase E3;Upstream regulatory element-binding protein 1	HSPC272;HUWE1;KIAA0312;KIAA1578;UREB1	S2362	0.835834	1.09	1.1028	6.53	0.882582	12.54	1.20558	2.1	0.990818	11.5	1.3812		1.4254		1.66669	17.07	0.999937	IERDGGSGNSTII	GO:0005737;GO:0005634	GO:0016881;GO:0005488	GO:0006464	0	0	1.1028	6.5253	4	0.85464	7.1116	4	0.80031	12.539	4	1.3194	1.089	2	1.4636	6.8493	2	1.0932	2.1041	2	1.3812		1	1.2188
E7EVU8	ARF-binding protein 1;E3 ubiquitin-protein ligase HUWE1;HECT, UBA and WWE domain-containing protein 1;Homologous to E6AP carboxyl terminus homologous protein 9;Large structure of UREB1;Mcl-1 ubiquitin ligase E3;Upstream regulatory element-binding protein 1	HSPC272;HUWE1;KIAA0312;KIAA1578;UREB1	S2365									0.784936	12.21	1.0734	6.17	1.52391	12.19	1.24718	18.23	0.97705	DGGSGNSTIIVSR	GO:0005737;GO:0005634	GO:0016881;GO:0005488	GO:0006464	n/a	0										1.3296		1	1.5362		1	1.0771		1	1.0734	6.1692	2	1.49	10.744
E7EVU8	ARF-binding protein 1;E3 ubiquitin-protein ligase HUWE1;HECT, UBA and WWE domain-containing protein 1;Homologous to E6AP carboxyl terminus homologous protein 9;Large structure of UREB1;Mcl-1 ubiquitin ligase E3;Upstream regulatory element-binding protein 1	HSPC272;HUWE1;KIAA0312;KIAA1578;UREB1	S2890									0.878703	16.98	1.0707	12.31	0.831548	78.01	0.472318	11.82	0.739478	QPRAGSSTPGDAP	GO:0005737;GO:0005634	GO:0016881;GO:0005488	GO:0006464	n/a	5
E7EVU8	ARF-binding protein 1;E3 ubiquitin-protein ligase HUWE1;HECT, UBA and WWE domain-containing protein 1;Homologous to E6AP carboxyl terminus homologous protein 9;Large structure of UREB1;Mcl-1 ubiquitin ligase E3;Upstream regulatory element-binding protein 1	HSPC272;HUWE1;KIAA0312;KIAA1578;UREB1	S3818			0.70765	24.48	0.432388	7.78			0.621509	79.91	0.55006	5.12	0.582789	5.5	0.59984	20.42	0.881392	MDVDQPSPSAQDT	GO:0005737;GO:0005634	GO:0016881;GO:0005488	GO:0006464	n/a	0	0.70765	24.481	2	0.59725	20.746	2	0.61102	7.7832	2										0.55006	5.1169	3	0.53739	5.628
E7EVU8	ARF-binding protein 1;E3 ubiquitin-protein ligase HUWE1;HECT, UBA and WWE domain-containing protein 1;Homologous to E6AP carboxyl terminus homologous protein 9;Large structure of UREB1;Mcl-1 ubiquitin ligase E3;Upstream regulatory element-binding protein 1;HECT, UBA and WWE domain containing 1	HSPC272;HUWE1;KIAA0312;KIAA1578;UREB1;HUWE1;RP3-339A18.4-007	T1090																	0.263038	SHHAASTTTAPTP	GO:0005737;GO:0005634	GO:0016881;GO:0005488	GO:0006464	n/a	n/a
E7EVU8	ARF-binding protein 1;E3 ubiquitin-protein ligase HUWE1;HECT, UBA and WWE domain-containing protein 1;Homologous to E6AP carboxyl terminus homologous protein 9;Large structure of UREB1;Mcl-1 ubiquitin ligase E3;Upstream regulatory element-binding protein 1;HECT, UBA and WWE domain containing 1	HSPC272;HUWE1;KIAA0312;KIAA1578;UREB1;HUWE1;RP3-339A18.4-007	T1091																	0.263038	HHAASTTTAPTPA	GO:0005737;GO:0005634	GO:0016881;GO:0005488	GO:0006464	n/a	n/a
E7EW49	CLIP-associating protein 2;Cytoplasmic linker-associated protein 2;Protein Orbit homolog 2;cDNA FLJ33397 fis, clone BRACE2007937, highly similar to CLIP-associating protein 2;Cytoplasmic linker associated protein 2, isoform CRA_c	CLASP2;KIAA0627;CLASP2;hCG_1997378	S602	0.965678	35.92	1.0776		0.686625		0.949204	38.98	0.790804	9.46	0.96051	14.15	0.986156	20.07	0.659236	37.18	0.646994	PGSIQRSRSDIDV				0	0	1.0776		1	0.7		1	0.63718		1	1.1159	35.918	4	1.154	33.264	4	0.88085	38.976	4	0.96051	14.154	5	1.0958	22.843
E7EW49	CLIP-associating protein 2;Cytoplasmic linker-associated protein 2;Protein Orbit homolog 2;cDNA FLJ33397 fis, clone BRACE2007937, highly similar to CLIP-associating protein 2;Cytoplasmic linker associated protein 2, isoform CRA_c	CLASP2;KIAA0627;CLASP2;hCG_1997378	S604	0.71772	17.19	1.1017	19.99	1.18719	10.7	1.02989	43.55	0.72345	3.34	0.53379	66.7	0.610229	14.98	0.568433	9.05	0.996138	SIQRSRSDIDVNA				0	0	1.1017	19.986	9	1.1354	23.981	9	1.0776	10.702	9	1.535	17.185	7	1.2435	36.523	7	0.93482	43.553	7	0.53379	66.695	4	1.1026	21.975
E7EW49	CLIP-associating protein 2;Cytoplasmic linker-associated protein 2;Protein Orbit homolog 2	CLASP2;KIAA0627	S759	0.829451	15.75	0.8545	22.61	1.06582	6.88	1.13418	14.54			0.82023		1.05539				0.734778	IPRPSVSQGCSRE				0	n/a	0.8545	22.61	9	1.1317	20.78	9	1.2473	6.8817	9	1.0302	15.752	4	1.4747	5.0494	4	1.3273	14.539	4	0.82023		1	1.2597
E7EW49	CLIP-associating protein 2;Cytoplasmic linker-associated protein 2;Protein Orbit homolog 2	CLASP2;KIAA0627	S763	0.829451	15.75	0.8545	22.61	1.06582	6.88	1.13418	14.54			0.82023		1.05539				0.999965	SVSQGCSREASRE				0	n/a	0.8545	22.61	9	1.1317	20.78	9	1.2473	6.8817	9	1.0302	15.752	4	1.4747	5.0494	4	1.3273	14.539	4	0.82023		1	1.2597
E7EWN3	SET domain-containing protein 5	KIAA1757;SETD5	S1150	1.3814		1.2154	14.38	1.36064	4.75	1.11455		1.16961	21.78	1.3254	14.99	1.45277	12.45	1.51149	3.26	0.632217	SPHKKFSPSHSSM				0	0	1.2154	14.376	4	1.2518	10.298	4	1.1195	4.7461	4	0.87983		1	0.93064		1	0.91702		1	1.3254	14.988	4	1.3932	18.663
E7EWN3	SET domain-containing protein 5	KIAA1757;SETD5	S496	0.968192	32.82	0.98833	22.1	0.863039	45.49	0.782589	33.61	1.01136		1.2024	23.95	0.98378	27.48	1.16152		0.681831	EKVTVSSDHEEVD				0	0	0.98833	22.101	3	0.97991	34.04	3	0.87323	45.494	3	1.0208	32.816	14	0.78007	22.542	14	0.79183	33.606	14	1.2024	23.953	4	0.96814	13.844
E7EWN3	SET domain-containing protein 5	KIAA1757;SETD5	S871	0.932952	16.17	0.85283	12.59	0.957643	8.58	0.904682	14.62	1.09923	14.93	1.033	23.31	1.06626	8.79	1.14219	8.74	1	KIIRPISPVTPPP				0	0	0.85283	12.59	9	0.89397	18.573	9	1.1229	8.5808	9	0.91412	16.166	13	0.90683	19.709	13	1.0608	14.615	13	1.033	23.314	6	1.0682	20.078
E7EWN3	SET domain-containing protein 5	KIAA1757;SETD5	T874	0.932952	16.17	0.85283	12.59	0.957643	8.58	0.904682	14.62	1.09923	14.93	1.033	23.31	1.06626	8.79	1.14219	8.74	1	RPISPVTPPPPNS				0	0	0.85283	12.59	9	0.89397	18.573	9	1.1229	8.5808	9	0.91412	16.166	13	0.90683	19.709	13	1.0608	14.615	13	1.033	23.314	6	1.0682	20.078
E7EWP4	Putative uncharacterized protein DNPEP	DNPEP	S5	1.19265	83.91	1.3818	15.39	1.0019	38.55	1.42063	49.29	0.63472	20.23	1.208	14.76	1.07553	34.77	0.848813	46.97	0.964748	__MSGHSPTRGAM		GO:0004177;GO:0008237;GO:0008270	GO:0006508	0	0
E7EWR4	CF-1 64 kDa subunit;Cleavage stimulation factor 64 kDa subunit;Cleavage stimulation factor subunit 2;cDNA FLJ58787, highly similar to Cleavage stimulation factor 64 kDa subunit	CSTF2	S544									0.854128	6.06	1.0563	12.75	1.24094	14.32	1.30559	3.39	0.959569	SQPGGFSPGQNQV	GO:0005634	GO:0003676;GO:0000166		n/a	0										0.77033		1	1.2337		1	1.5577		1	1.0563	12.751	3	1.3847	30.072
E7EX10	Zinc finger protein 275;HCG2039464;Putative uncharacterized protein ZNF275;ZNF275 protein;Putative uncharacterized protein ZNF275	ZNF275;hCG_2039464;ZNF275;ZNF275	S147	1.09153	6.57	1.22	5.85	1.26697	22.78	1.25855	9.83			1.5301	21.38	1.61227	17.58			1	SDGKRGSPQNIPI	GO:0005622	GO:0003676;GO:0008270	GO:0006355	0	n/a	1.22	5.8532	2	1.2095	16.228	2	1.0385	22.783	2	1.1177	6.5655	3	1.006	1.9772	3	1.0316	9.8344	3	1.5301	21.375	2	1.0083	30.082
E7EX17	Eukaryotic translation initiation factor 4B;cDNA FLJ59405, highly similar to Eukaryotic translation initiation factor 4B	EIF4B	S192											0.77925	9.61	0.950607	24.23			0.992038	RDRNRDSDKTDTD		GO:0003676;GO:0000166		n/a	n/a																			0.77925	9.6149	4	0.84833	25.808
E7EX17	Eukaryotic translation initiation factor 4B;cDNA FLJ59405, highly similar to Eukaryotic translation initiation factor 4B	EIF4B	S422			1.0968		1.23642												0.413588	ERSRTGSESSQTG		GO:0003676;GO:0000166		n/a	n/a	1.0968		1	1.1802		1	1.1273		1
E7EX17	Eukaryotic translation initiation factor 4B;cDNA FLJ59405, highly similar to Eukaryotic translation initiation factor 4B	EIF4B	S447	0.859957	23.88	0.88868	26.68	0.874319	13.92	1.01061	29.61	0.447992	20.94	0.37996	28.48	0.397438	58.23	0.297763	18.27	0.999996	DARRRESEKSIEN		GO:0003676;GO:0000166		0	7	0.88868	26.681	7	0.91835	20.324	7	0.98384	13.918	7	1.0334	23.88	30	1.1773	23.63	30	1.1372	29.611	30	0.37996	28.477	14	0.48788	24.997
E7EX17	Eukaryotic translation initiation factor 4B;cDNA FLJ59405, highly similar to Eukaryotic translation initiation factor 4B	EIF4B	S450	0.986428	11.39	1.02629	21.26	1.18415	12.085	1.11762	6.38	0.667165	16.5	0.73703	16.925	0.852559	32.34	0.612188	13.725	1	RRESEKSIENETI		GO:0003676;GO:0000166		0	0	0.88868	26.681	7	0.91835	20.324	7	0.98384	13.918	7	1.1313		1	1.006		1	0.82648		1	0.37996	28.477	14	0.48788	24.997
E7EX17	Eukaryotic translation initiation factor 4B;cDNA FLJ59405, highly similar to Eukaryotic translation initiation factor 4B	EIF4B	S500																	0.364785	SNPPARSQSSDTE		GO:0003676;GO:0000166		n/a	n/a
E7EX17	Eukaryotic translation initiation factor 4B;cDNA FLJ59405, highly similar to Eukaryotic translation initiation factor 4B	EIF4B	T420			1.39775	13.09	1.31479	23.04					0.81533	7.09	0.581232	31.7			0.413588	ERERSRTGSESSQ		GO:0003676;GO:0000166		n/a	n/a	1.0932	13.086	4	1.2431	27.908	4	1.2376	23.041	4										0.81533	7.0922	2	0.7876	28.528
E7EX17	Eukaryotic translation initiation factor 4B;cDNA FLJ59405, highly similar to Eukaryotic translation initiation factor 4B	EIF4B	T466											0.38476		0.549976				0.575389	EDCHSPTSKPPKP		GO:0003676;GO:0000166		n/a	n/a																			0.38476		1	0.55593
E7EXA6	CHL12;Chromosome transmission fidelity protein 18 homolog	C16orf41;CHTF18;CTF18	S1080																	0.980894	SPQVDGSPPGIEG		GO:0005524;GO:0017111		n/a	n/a
E9PAU2	Protein raver-1;Ribonucleoprotein PTB-binding 1	KIAA1978;RAVER1	S31	1.14856	12.64	1.16125	6.905	1.3396	23.225	1.35199	16.1	0.699796	14.31	0.924605	14.665	1.09376	15.985	0.908031	16.19	1	THRPPISPKSGAE		GO:0003676;GO:0000166		0	0	1.1521	9.6841	60	1.4036	12.139	60	1.3527	31.826	60	1.0793	13.79	26	1.2426	10.682	26	1.2001	14.896	26	0.74411	17.137	26	0.91921	21.145
E9PAU2			S584	1.47611	7.18	1.2854	6.37	1.47924	12.66	1.49543	10.97	0.812397	7.29	0.92926	2.1	1.45364	33.71	0.85103	13.09	0.999993	IKSRIISPISSAR		GO:0003676;GO:0000166		0	0
E9PAU2			S634	1.31335	24.655	1.1948	17.145	1.35309	15.76	1.43582	15.86	0.863326	18.52	0.973875	17.985	1.29915	12.305	0.963635	15.06	0.999991	PSRHKMSPPPSGF		GO:0003676;GO:0000166		0	0	1.0189	22.369	15	1.3711	14.716	15	1.5009	11.042	15	0.98334	20.096	19	1.1732	8.3856	19	1.4297	10.688	19	0.82175	17.606	12	1.0641	23.684
E9PB29			S35	1.26716		0.97101	14.32	0.833151	2.03	1.51963		0.987515	14.93	0.93927	36.03	1.14835	40.55	0.6301	160.64	0.787379	IHPVADSSPAGAQ				0	0	1.1062		1	1.007		1	0.9717		1										1.0399		1	1.1741
E9PB29			S36	1.29822		0.89409	14.5	0.767786	17.735	1.17434		1.03822	16.755	0.880185	23.655	0.853234	31.87	0.5733	93.885	0.657652	HPVADSSPAGAQI				0	0	0.95236	14.677	10	0.98086	19.959	10	0.97312	33.436	10	0.61112		1	0.71024		1	1.0619		1	0.92173	11.283	4	0.91188	25.861
E9PB29	HCG32827, isoform CRA_d;Putative uncharacterized protein C17orf49;MLL1/MLL complex subunit C17orf49	C17orf49;hCG_32827;C17orf49	S62	1.12655	22.165	0.95895	20.525	0.86949	33.685	0.903134	44.275	0.980017	41.185	0.849415	34.36	1.01327	31.695	0.791455	30.445	1	IPIPAESPKKGPK				0	0	0.8377	23.215	47	0.86373	26.259	47	1.0091	33.031	47	0.81775	22.073	10	0.92191	25.579	10	1.0719	37.181	10	0.9869	37.161	29	0.92166	41.566
E9PBB7	Syntaxin-12;Syntaxin 12	STX12;RP3-426I6.4-002;STX12	S142	1.14097	39.96	1.062	37.1	1.21323	47.16	1.0825	34	1.12158	130.9	1.1185	29.29	0.684209	52.33	1.52988	65.11	1	RAGSRISAEERQR	GO:0016020	GO:0005484	GO:0006886;GO:0016192	0	0	1.062	37.101	17	1.1479	68.63	17	1.1424	47.155	17	0.93079	39.956	12	1.1874	29.957	12	1.0193	33.996	12	1.1185	29.294	11	1.0515	30.291
E9PBC2			S192	1.15633	78.61	0.91059	22.5	1.0245	11.37	0.949108	24.75			1.4195		1.2025				0.999995	YGKAGGSPASYHG				0	n/a	0.91059	22.498	5	1.0038	8.5538	5	1.1251	11.373	5	0.78748	78.613	4	0.83419	62.325	4	1.0423	24.748	4	1.4195		1	1.1032
E9PBC2			S195	1.15633	78.61	0.91059	22.5	1.0245	11.37	0.949108	24.75			1.4195		1.2025				0.999905	AGGSPASYHGSTS				0	n/a	0.91059	22.498	5	1.0038	8.5538	5	1.1251	11.373	5	0.78748	78.613	4	0.83419	62.325	4	1.0423	24.748	4	1.4195		1	1.1032
E9PBC2	EPS-15-interacting protein 2;Epsin-2;Putative uncharacterized protein EPN2	EPN2;KIAA1065;EPN2	S454			1.2624	22.34	0.898273	52.74											0.554516	ARKTPESFIGPNA				n/a	n/a	1.2624	22.34	3	0.98081	45.433	3	0.71156	52.739	3
E9PBD4	Dolichyl-phosphate mannosyltransferase polypeptide 1, catalytic subunit;Dolichol-phosphate mannose synthase;Dolichol-phosphate mannosyltransferase;Dolichyl-phosphate beta-D-mannosyltransferase;Mannose-P-dolichol synthase;Dolichyl-phosphate mannosyltransferase polypeptide 1, catalytic subunit	DPM1;RP5-914P20.2-005;DPM1;DPM1;RP5-914P20.2-004	S7	1.19256		1.0766	29.53	1.10522	4.06	0.937293		1.10699	22.67	1.13365		0.851876		1.05024	34.28	0.708666	MASIEVSRSPRRS		GO:0016757		0	0	1.0329	42.316	3	1.2188	19.577	3	1.3044	4.2473	3	0.90451		1	1.2071		1	1.1367		1	1.2391		1	1.0861
E9PBM3	AF4/FMR2 family member 1;ALL1-fused gene from chromosome 4 protein;Protein FEL;Proto-oncogene AF4	AF4;AFF1;FEL;MLLT2;PBM1	S206																	0.998937	APEREISPIISIP				n/a	n/a
E9PBM3	AF4/FMR2 family member 1;ALL1-fused gene from chromosome 4 protein;Protein FEL;Proto-oncogene AF4	AF4;AFF1;FEL;MLLT2;PBM1	S213									0.911731	1.53	0.80349	16.17	0.73353	8.94	0.61618	7.48	0.99851	PIISIPSPVPPIS				n/a	0																			0.80349	16.166	3	0.84051	11.63
E9PBM3	AF4/FMR2 family member 1;ALL1-fused gene from chromosome 4 protein;Protein FEL;Proto-oncogene AF4	AF4;AFF1;FEL;MLLT2;PBM1	S219									0.911731	1.53	0.80349	16.17	0.73353	8.94	0.61618	7.48	0.776717	SPVPPISPIHSNQ				n/a	0																			0.80349	16.166	3	0.84051	11.63
E9PC97	PHD finger protein 6;PHD finger protein 6, isoform CRA_d	AC004383.6-002;hCG_1783600;PHF6	S146									0.62048	31.97	0.61703	16.91	0.38407	3.64	0.448982	8.68	0.94992	AADIEESFNEHEI	GO:0005730	GO:0008270		n/a	1										1.1045		1	0.63612		1	0.66961		1	0.61703	16.913	2	0.63418	6.7486
E9PCP3	Ensconsin;Epithelial microtubule-associated protein of 115 kDa;Microtubule-associated protein 7;cDNA, FLJ78961, highly similar to Homo sapiens microtubule-associated protein 7 (MAP7), mRNA;cDNA FLJ50486, highly similar to Homo sapiens microtubule-associated protein 7 (MAP7), mRNA	MAP7	S387	0.832085	19.88	0.82864	21.36	2.10135	72.66	1.35085	39.81	0.593113	34.55	0.54325	21.67	0.712418	20.12	0.506428	21.63	1	AQVRPPSPGNIRP	GO:0005737;GO:0015630			4	0	0.82864	21.357	13	2.6427	80.497	13	2.5359	72.664	13	0.99586	19.881	23	1.7329	39.779	23	1.6302	39.809	23	0.54325	21.665	28	0.67146	16.219
E9PCR4	Anaphase-promoting complex subunit 4;Cyclosome subunit 4	ANAPC4;APC4	S780	1.03952	12.15	1.035	9.33	0.932545	10.38	0.746173	5.61	0.955658	12.59	0.89894	13.97	0.773529	14.49	0.843493	11.01	0.817061	EEVISESEAENQQ	GO:0005680		GO:0031145;GO:0030071	0	0	1.035	9.3255	2	0.77278	4.634	2	0.90101	10.383	2	0.99565	12.147	2	0.83074	2.1085	2	0.72094	5.6085	2	0.89894	13.97	7	0.85622	11.634
E9PCS5	Chromobox protein homolog 1;Heterochromatin protein 1 homolog beta;Heterochromatin protein p25;HP1Hsbeta;M31;Modifier 1 protein;p25beta;Putative uncharacterized protein CBX1;Putative uncharacterized protein CBX1	CBX;CBX1;CBX1;CBX1	S89	1.02361	18	1.02607	45.085	1.16653	12.875	0.941045	20.26	0.674267	27.83	0.71006	76.74	0.692131	57.29	0.681658	18.42	0.999861	GKRKADSDSEDKG				0	0	1.0969	76.734	21	1.1708	78.957	21	1.1073	19.839	21	1.0024	18.001	13	0.9471	20.669	13	0.91714	20.26	13	0.71006	76.741	46	0.86848	77.112
E9PCT1	Ser/Arg-related nuclear matrix protein;Serine/arginine repetitive matrix protein 1;SR-related nuclear matrix protein of 160 kDa	SRM160;SRRM1	S10									1.20127	17.63	0.99715	23.32	0.78371	79.95	1.0492	36.17	0.809226	GFFRGTSAEQDNR			GO:0006397	n/a	0
E9PCT1	cDNA FLJ57710, highly similar to Serine/arginine repetitive matrix protein 1;Ser/Arg-related nuclear matrix protein;Serine/arginine repetitive matrix protein 1;SR-related nuclear matrix protein of 160 kDa	SRM160;SRRM1	S207	0.991242	19.09	1.0865	15.58	1.08751	27.73	1.28609	34.28	0.879111	26.08	0.78996	16.49	0.618693	27.8	0.560003	8.23	1	PRHRTKSRSPSPA			GO:0006397	0	0	1.0803	15.584	11	0.90981	27.782	11	1.1621	27.728	11	1.0961	19.085	13	1.0834	27.33	13	1.1837	34.278	13	1.1982	16.493	10	1.2612	5.3184
E9PCT1	cDNA FLJ57710, highly similar to Serine/arginine repetitive matrix protein 1;Ser/Arg-related nuclear matrix protein;Serine/arginine repetitive matrix protein 1;SR-related nuclear matrix protein of 160 kDa	SRM160;SRRM1	S209	1.21922		0.921465	25.61	0.850535	19.76	1.11571		0.879111	26.08	0.78996	16.49	0.618693	27.8	0.560003	8.23	1	HRTKSRSPSPAPE			GO:0006397	0	0	0.75023	25.608	3	0.89152	20.634	3	1.0063	19.757	3	0.75578		1	0.77521		1	1.2108		1	1.1982	16.493	10	1.2612	5.3184
E9PCT1	cDNA FLJ57710, highly similar to Serine/arginine repetitive matrix protein 1;Ser/Arg-related nuclear matrix protein;Serine/arginine repetitive matrix protein 1;SR-related nuclear matrix protein of 160 kDa	SRM160;SRRM1	S211	1.21922		0.921465	25.61	0.850535	19.76	1.11571		0.879111	26.08	0.78996	16.49	0.618693	27.8	0.560003	8.23	1	TKSRSPSPAPEKK			GO:0006397	0	0	0.75023	25.608	3	0.89152	20.634	3	1.0063	19.757	3	0.75578		1	0.77521		1	1.2108		1	1.1982	16.493	10	1.2612	5.3184
E9PCT1	cDNA FLJ57710, highly similar to Serine/arginine repetitive matrix protein 1;Ser/Arg-related nuclear matrix protein;Serine/arginine repetitive matrix protein 1;SR-related nuclear matrix protein of 160 kDa	SRM160;SRRM1	S260	0.993662	19.275	0.70232	32.535	0.761139	51.135	0.685443	30.245	0.925028	19.995	0.783115	21.055	0.833978	18.315	0.86127	22.97	1	PEPKEPSPEKNSK			GO:0006397	0	0	0.70116	54.351	66	0.76425	67.391	66	1.129	39.397	66	0.70234	15.899	11	0.66054	18.424	11	0.94694	47.192	11	0.88155	17.341	56	0.91357	15.379
E9PCT1	cDNA FLJ57710, highly similar to Serine/arginine repetitive matrix protein 1;Ser/Arg-related nuclear matrix protein;Serine/arginine repetitive matrix protein 1;SR-related nuclear matrix protein of 160 kDa	SRM160;SRRM1	S290	0.912757	75.09	0.76782	3.4	0.97229	0.53	1.02251	20.42			0.92705	2.67	0.495388	2.74			0.844901	SRSRTRSRSPSHT			GO:0006397	0	n/a	0.76782	3.3973	2	0.86997	2.7279	2	1.2663	0.53171	2	0.84121	75.093	22	1.0436	80.475	22	1.3317	20.424	22	0.92705	2.6698	2	0.65546	50.297
E9PCT1	cDNA FLJ50614, highly similar to Transformer-2 protein homolog;cDNA FLJ57710, highly similar to Serine/arginine repetitive matrix protein 1;Splicing factor, arginine/serine-rich 10;Transformer-2 protein homolog B;Transformer-2 protein homolog beta;Transformer-2 protein homolog A;Transformer-2 protein homolog alpha;cDNA FLJ50682, highly similar to Transformer-2 protein homolog;cDNA FLJ50689, highl…	SFRS10;TRA2B;TRA2A;SRM160;SRRM1	S304	1.01223	15.65	1.076	9.66	1.1708	10.29	1.06698	17.64	1.42714	44.09	1.141	72.02	0.766969	42.39	0.570044	23.44	1	GGYRSRSRSRSYS			GO:0006397	0	0	1.076	9.655	12	1.1138	14.101	12	1.0881	10.286	12	1.063	15.647	14	1.0545	20.989	14	0.99162	17.637	14	1.141	72.017	37	1.0736	77.33
E9PCT1	Ser/Arg-related nuclear matrix protein;Serine/arginine repetitive matrix protein 1;SR-related nuclear matrix protein of 160 kDa	SRM160;SRRM1	S389	1.11134	35.69	0.94901	16.28	0.844946	32.055	0.650869	16.74	0.971503	13.705	1.06195	13.385	1.09222	22.31	1.13502	26.92	1	RKTRRISPSASPP			GO:0006397	0	0	0.92714	19.871	27	0.84737	45.369	27	0.96239	36.17	26	0.93847	16.133	32	0.80158	16.272	32	0.87481	13.836	32	1.0505	12.878	26	1.123	14.694
E9PCT1	Ser/Arg-related nuclear matrix protein;Serine/arginine repetitive matrix protein 1;SR-related nuclear matrix protein of 160 kDa	SRM160;SRRM1	S391	1.00252	13.1	0.869225	15.9	0.88677	21.15	0.748381	22.44	0.912615	17.91	0.82682	20.14	0.852865	15.62	0.863365	27.945	1	TRRISPSASPPRR			GO:0006397	0	0	0.88965	15.901	28	0.85028	15.519	28	0.92907	21.152	28	0.86885	13.099	21	0.80423	16.741	21	0.89153	22.443	21	0.98969	20.139	7	0.9752	27.25
E9PCT1	Ser/Arg-related nuclear matrix protein;Serine/arginine repetitive matrix protein 1;SR-related nuclear matrix protein of 160 kDa	SRM160;SRRM1	S393	1.04678	25.67	0.8326	15.285	0.805923	42.465	0.613651	31.855	1.03251	21.685	1.03555	16.875	1.06827	20.895	1.11399	29.03	1	RISPSASPPRRRH			GO:0006397	0	0	0.8164	15.867	4	0.85948	24.874	4	1.0931	41.351	4	0.91965	15.41	44	0.79248	15.722	44	0.87481	17.574	44	1.038	13.282	35	1.1166	11.018
E9PCT1	Ser/Arg-related nuclear matrix protein;Serine/arginine repetitive matrix protein 1;SR-related nuclear matrix protein of 160 kDa	SRM160;SRRM1	S402	1.0365	22.845	0.75053	14.21	0.788728	28.93	0.673293	25.32	0.737578	16.025	0.61566	21.735	0.662937	15.465	0.649761	28.2	1	RRRHRPSPPATPP			GO:0006397	0	0	0.70839	19.902	8	0.58548	20.18	8	0.99229	27.446	8	0.70933	16.469	10	0.56608	14.008	10	0.85947	18.735	10	0.49829	31.203	9	0.59053	29.967
E9PCT1	Ser/Arg-related nuclear matrix protein;Serine/arginine repetitive matrix protein 1;SR-related nuclear matrix protein of 160 kDa	SRM160;SRRM1	S420	1.01681	7.59	0.96371	14.65	0.947924	66.39	0.972962	0.07	1.58886	20.76	1.0898	23.37	1.25708	51.88	1.7233	5.47	0.99217	SPTPQQSNRTRKS			GO:0006397	0	0	0.96371	14.653	4	0.94907	6.9857	4	0.98362	66.394	4	0.94778	7.5856	2	0.97354	0.24568	2	1.0096	0.072239	2	1.0898	23.372	4	1.0751	13.105
E9PCT1			S429	0.999312	92.8	1.0163	35.945	1.02074	25.87	1.18409	15.65	1.05114	73.32	1.0453	20.95	1.14429	66.34	0.847571	69.89	1	TRKSRVSVSPGRT			GO:0006397	0	0	1.0205	25.792	50	1.1102	24.887	50	1.1128	49.716	50	1.017	92.803	37	1.1813	12.697	37	1.1651	15.647	37	1.0453	20.953	60	1.2579	17.742
E9PCT1			S431	1.01594	83.38	1.02275	35.525	1.03483	25.295	1.21717	21.11	1.0727	73.095	1.0676	20.1	1.13731	82.27	0.864051	69.29	1	KSRVSVSPGRTSV			GO:0006397	0	0	1.0334	24.953	59	1.1231	24.721	59	1.1277	48.57	59	1.0067	83.381	46	1.2023	16.49	46	1.1901	21.11	46	1.0676	20.095	69	1.2695	21.664
E9PCT1	Ser/Arg-related nuclear matrix protein;Serine/arginine repetitive matrix protein 1;SR-related nuclear matrix protein of 160 kDa	SRM160;SRRM1	S448	1.15341	81.16	0.851375	139.48	0.726891	102.205	0.309177	124.535	0.827371	46.85	0.778515	97.445	0.365402	163.215	0.879695	77.01	0.996278	GTEKRESPSPAPK			GO:0006397	5	6	0.8509	79.129	23	0.84825	85.131	23	0.94081	49.942	23	0.79147	43.125	28	0.81811	36.846	27	0.55169	108.36	27	0.8489	47.29	33	0.9403	46.174
E9PCT1	Ser/Arg-related nuclear matrix protein;Serine/arginine repetitive matrix protein 1;SR-related nuclear matrix protein of 160 kDa	SRM160;SRRM1	S461	1.1431	63.345	0.96173	24.675	0.634886	72.345	0.637646	25.205	0.987531	34.435	1.03628	47.345	1.12978	24.415	1.11771	25.77	1	PRKVEISESEEDK			GO:0006397	0	0	0.85376	43.216	13	1.0293	38.796	13	0.96718	58.24	13	0.94349	61.324	23	0.96438	70.543	23	1.0038	25.931	23	1.0842	80.469	25	1.3033	71.786
E9PCT1	Ser/Arg-related nuclear matrix protein;Serine/arginine repetitive matrix protein 1;SR-related nuclear matrix protein of 160 kDa	SRM160;SRRM1	S522	0.998663	25.47	0.81423	14.41	0.822209	25.03	0.624954	25	0.899803	17.85	0.89902	15.49	0.955928	25.18	0.955299	7.87	1	GRRRRHSPSRSAS			GO:0006397	0	0	0.81423	14.414	16	0.78194	13.473	16	1.0098	25.026	16	0.81532	25.468	21	0.74727	19.25	21	0.76754	24.995	21	0.89902	15.494	39	0.94176	17.74
E9PCT1	Ser/Arg-related nuclear matrix protein;Serine/arginine repetitive matrix protein 1;SR-related nuclear matrix protein of 160 kDa	SRM160;SRRM1	S524	0.996333	25.47	0.81233	14.82	0.826627	25.88	0.623496	25	0.899803	17.85	0.89902	15.49	0.955928	25.18	0.955299	7.87	1	RRRHSPSRSASPS			GO:0006397	0	0	0.81233	14.816	15	0.78686	13.919	15	1.0176	25.878	15	0.81532	25.468	21	0.74727	19.25	21	0.76754	24.995	21	0.89902	15.494	39	0.94176	17.74
E9PCT1	Ser/Arg-related nuclear matrix protein;Serine/arginine repetitive matrix protein 1;SR-related nuclear matrix protein of 160 kDa	SRM160;SRRM1	S526	0.927324	27.08	0.7532	11.78	0.766456	26.35	0.577064	25.04	0.929023	17.38	0.89267	13.76	0.949176	25.21	0.931412	7.67	0.999755	RHSPSRSASPSPR			GO:0006397	0	0	0.7532	11.781	11	0.77705	11.566	11	1.0176	26.351	11	0.81223	27.079	18	0.75535	19.813	18	0.76615	25.037	18	0.89267	13.755	37	0.93239	17.912
E9PCT1	Ser/Arg-related nuclear matrix protein;Serine/arginine repetitive matrix protein 1;SR-related nuclear matrix protein of 160 kDa	SRM160;SRRM1	S528	1.06111	12.21	0.78715	13.98	0.779216	19.53	0.58442	19.78	1.12094	20.21	0.89902	11.37	0.95449	21.19	0.950983	4.86	0.983194	SPSRSASPSPRKR			GO:0006397	0	0	0.78715	13.978	10	0.77314	14.9	10	0.98992	19.532	10	0.74182	12.213	9	0.63541	16.814	9	0.74245	19.779	9	0.89902	11.374	27	0.9267	14.959
E9PCT1	Ser/Arg-related nuclear matrix protein;Serine/arginine repetitive matrix protein 1;SR-related nuclear matrix protein of 160 kDa	SRM160;SRRM1	S561	1.01059	17.36	0.76507	19.53	0.809788	15.315	0.630127	26.89	1.16035	39.7	0.766525	33.27	0.750252	51.865	0.750616	32.965	1	RGRRRRSPSPPPT			GO:0006397	0	0	0.78435	8.1477	27	0.75489	14.983	27	1.0003	14.781	27	0.77399	17.355	29	0.78265	11.064	29	1.0112	26.89	29	0.81991	29.859	42	0.84841	36.367
E9PCT1	Ser/Arg-related nuclear matrix protein;Serine/arginine repetitive matrix protein 1;SR-related nuclear matrix protein of 160 kDa	SRM160;SRRM1	S563	1.009	20.62	0.76799	19.935	0.805771	16.165	0.634106	32.9	1.18011	40.22	0.75522	32.2	0.734693	53.885	0.740565	31.125	0.999991	RRRRSPSPPPTRR			GO:0006397	0	0	0.79019	8.9621	20	0.75527	16.725	20	0.98179	16.484	20	0.78216	20.618	19	0.79033	12.397	19	1.0153	32.896	19	0.7973	27.724	33	0.79939	35.369
E9PCT1	Ser/Arg-related nuclear matrix protein;Serine/arginine repetitive matrix protein 1;SR-related nuclear matrix protein of 160 kDa	SRM160;SRRM1	S572	0.952963	14.01	0.74151	19.12	0.66251	28.745	0.663362	24.435	0.907416	14.67	0.78707	18.1	0.84307	24.81	0.820631	15.695	1	PTRRRRSPSPAPP			GO:0006397	0	0	0.76344	24.665	28	0.7025	30.218	28	0.95184	17.641	28	0.76651	15.568	34	0.74542	21.704	34	0.97306	18.658	34	0.84761	21.371	82	0.88581	26.887
E9PCT1	Ser/Arg-related nuclear matrix protein;Serine/arginine repetitive matrix protein 1;SR-related nuclear matrix protein of 160 kDa	SRM160;SRRM1	S574	0.952963	14.01	0.74151	19.12	0.66251	28.745	0.663362	24.435	0.907416	14.67	0.78707	18.1	0.84307	24.81	0.820631	15.695	1	RRRRSPSPAPPPR			GO:0006397	0	0	0.76344	24.665	28	0.7025	30.218	28	0.95184	17.641	28	0.76651	15.568	34	0.74542	21.704	34	0.97306	18.658	34	0.84761	21.371	82	0.88581	26.887
E9PCT1	Ser/Arg-related nuclear matrix protein;Serine/arginine repetitive matrix protein 1;SR-related nuclear matrix protein of 160 kDa	SRM160;SRRM1	S595	0.999808	13.61	0.754885	19.005	0.7055	31.265	0.693241	34.095	1.03057	19.74	0.853685	48.215	0.655805	29.265	0.848776	34.185	1	PRRRTPSPPPRRR			GO:0006397	0	0	0.77791	10.353	22	0.74325	16.768	22	0.96734	17.605	22	0.76871	18.377	26	0.77836	18.663	26	0.98837	27.105	26	0.84273	83.023	51	0.86721	85.842
E9PCT1	Ser/Arg-related nuclear matrix protein;Serine/arginine repetitive matrix protein 1;SR-related nuclear matrix protein of 160 kDa	SRM160;SRRM1	S619	0.965007	14.64	0.85902	12.99	1.08391	13.73	1.0611	16.73	0.955906	9.57	0.94476	8.93	1.10631	10.255	1.16758	12.96	1	QRRYSPSPPPKRR			GO:0006397	0	0	0.8424	12.193	49	0.94202	15.891	49	1.1453	12.182	49	0.86456	14.639	41	0.89683	14.666	41	1.0309	16.734	41	0.96828	15.307	55	1.0098	14.697
E9PCT1	Ser/Arg-related nuclear matrix protein;Serine/arginine repetitive matrix protein 1;SR-related nuclear matrix protein of 160 kDa	SRM160;SRRM1	S628	0.979398	33.955	0.822175	32.28	1.05744	32.025	0.75518	25.905	0.992402	33.29	0.84379	48.16	0.649921	61.05	1.1049	43.425	1	PKRRTASPPPPPK			GO:0006397	0	0	0.81659	31.771	22	0.69978	20.348	22	1.02	26.078	22	0.82368	33.991	10	0.74335	22.894	10	0.91883	12.431	10	0.90952	31.067	31	0.88981	35.232
E9PCT1	Ser/Arg-related nuclear matrix protein;Serine/arginine repetitive matrix protein 1;SR-related nuclear matrix protein of 160 kDa	SRM160;SRRM1	S638	1.05556	48.06	0.82831	18.13	0.866176	21.765	0.706996	36.955	0.938698	30.295	0.866855	46.965	0.763201	24.62	0.745478	38.44	1	PPKRRASPSPPPK			GO:0006397	0	0	0.8619	17.306	37	0.87903	20.462	37	1.1031	13.656	37	0.86324	66.12	37	0.86956	68.531	37	1.085	35.824	37	0.93977	59.728	62	0.96386	62.44
E9PCT1	Ser/Arg-related nuclear matrix protein;Serine/arginine repetitive matrix protein 1;SR-related nuclear matrix protein of 160 kDa	SRM160;SRRM1	S640	1.05556	48.06	0.82831	18.13	0.866176	21.765	0.706996	36.955	0.938698	30.295	0.866855	46.965	0.763201	24.62	0.745478	38.44	1	KRRASPSPPPKRR			GO:0006397	0	0	0.8619	17.306	37	0.87903	20.462	37	1.1031	13.656	37	0.86324	66.12	37	0.86956	68.531	37	1.085	35.824	37	0.93977	59.728	62	0.96386	62.44
E9PCT1	Ser/Arg-related nuclear matrix protein;Serine/arginine repetitive matrix protein 1;SR-related nuclear matrix protein of 160 kDa	SRM160;SRRM1	S648	0.910882	13.18	0.864445	61.675	0.953198	67.975	1.11885	21.59	0.856611	8.495	0.82143	24.37	0.803042	17.065	0.817146	43.02	1	PPKRRVSHSPPPK			GO:0006397	0	0	0.9243	18.948	24	1.0542	15.237	24	1.2353	15.072	24	0.94902	13.178	23	1.0602	17.699	23	1.2943	21.586	23	1.0233	29.799	63	1.1766	28.085
E9PCT1	Ser/Arg-related nuclear matrix protein;Serine/arginine repetitive matrix protein 1;SR-related nuclear matrix protein of 160 kDa	SRM160;SRRM1	S650	0.934185	19.68	0.86982	57.34	0.856747	74.015	0.773392	39.93	0.991768	8.835	0.94758	15.21	0.846298	10.925	0.852476	40.915	1	KRRVSHSPPPKQR			GO:0006397	0	0	0.93505	10.279	7	0.8515	19.686	7	0.9999	27.146	7	0.9311	19.68	4	0.79149	14.296	4	0.88914	39.93	4	1.2756	11.475	2	1.058	19.225
E9PCT1	Ser/Arg-related nuclear matrix protein;Serine/arginine repetitive matrix protein 1;SR-related nuclear matrix protein of 160 kDa	SRM160;SRRM1	S665	1.35792	73.31	0.970995	27.88	0.96113	26.25	0.954876	28.21	0.752266	13.72	0.735325	17.84	0.322569	31.31	0.848686	28.05	0.977494	PVTKRRSPSISSK			GO:0006397	0	6	0.97418	27.879	3	1.0292	4.0806	3	0.78728	26.251	3	0.91588	73.306	3	0.8924	65.08	3	0.8482	28.211	3	1.2562	17.837	8	1.116	35.139
E9PCT1	Ser/Arg-related nuclear matrix protein;Serine/arginine repetitive matrix protein 1;SR-related nuclear matrix protein of 160 kDa	SRM160;SRRM1	S687	0.75969	18.78	0.787035	20.515	0.8037	19.19	0.871665	17.08	0.974335	38.74	1.01495	78.145	1.18632	13.91	1.26954	19.05	1	STREARSPQPNKR			GO:0006397	0	0	0.67138	35.187	12	0.60627	49.676	12	0.94885	34.76	12	1.1444		1	0.76444		1	0.97216		1	1.1128	85.593	40	1.1557	82.917
E9PCT1	Ser/Arg-related nuclear matrix protein;Serine/arginine repetitive matrix protein 1;SR-related nuclear matrix protein of 160 kDa	SRM160;SRRM1	S707			0.855345	10.66	0.984973	67.95			0.808759	19.72	0.823005		0.901026		0.956784	16.93	0.561643	RAPQTSSSPPPVR			GO:0006397	n/a	0	0.85853		1	0.91515		1	1.1359		1										0.99694		1	1.1146
E9PCT1	Ser/Arg-related nuclear matrix protein;Serine/arginine repetitive matrix protein 1;SR-related nuclear matrix protein of 160 kDa	SRM160;SRRM1	S708	0.932681	17.76	0.820125	8.16	0.886637	36.92	1.0681	29.02	1.05027	21.76	0.91815	5.435	1.08883	6.04	1.1307	11.22	0.97821	APQTSSSPPPVRR			GO:0006397	0	0	0.77354	4.4244	6	0.79873	15.734	6	1.0041	17.631	6	0.9175		1	1.1257		1	1.7494		1	0.91886	6.8706	4	1.045	7.9925
E9PCT1	Ser/Arg-related nuclear matrix protein;Serine/arginine repetitive matrix protein 1;SR-related nuclear matrix protein of 160 kDa	SRM160;SRRM1	S718	1.28513	28.53	1.0773	55.55	1.00627	50.74	0.96225	2.76	0.81615	15.11	0.94302	4.31	1.10069	2.79	0.990454	8.84	0.906422	VRRGASSSPQRRQ			GO:0006397	0	0	1.129	55.553	6	0.98079	7.1384	6	0.81044	50.743	6	0.78331		1	0.8772		1	0.85119		1	1.0203	4.3102	9	1.1407	3.6869
E9PCT1	Ser/Arg-related nuclear matrix protein;Serine/arginine repetitive matrix protein 1;SR-related nuclear matrix protein of 160 kDa	SRM160;SRRM1	S719	0.993236		1.0426	12.09	0.968482	21.92	0.953421		0.885576	20.73	1.0069	10.19	1.15139	8.95	1.08171	19.33	0.997708	RRGASSSPQRRQS			GO:0006397	0	0	1.0426	12.085	9	0.93433	9.9393	9	0.92891	21.917	9	1.0065		1	0.89817		1	0.91176		1	1.0069	10.185	8	1.1177	11.364
E9PCT1	Ser/Arg-related nuclear matrix protein;Serine/arginine repetitive matrix protein 1;SR-related nuclear matrix protein of 160 kDa	SRM160;SRRM1	S725	0.903216	29.38	0.759275	41	0.669172	39.065	0.822561	17.78	0.768639	65.265	0.679965	80.81	0.460098	32.88	0.575998	33.56	0.990967	SPQRRQSPSPSTR			GO:0006397	0	1	0.91858	81.964	23	0.83437	87.991	23	0.9209	46.87	23	0.86694	29.379	9	0.80199	15.56	9	1.0301	17.783	9	0.97083	80.814	24	1.0697	90.858
E9PCT1	Ser/Arg-related nuclear matrix protein;Serine/arginine repetitive matrix protein 1;SR-related nuclear matrix protein of 160 kDa	SRM160;SRRM1	S729	0.91695	5.69	0.87687		0.88634		1.03102	5.73	0.971556	1.59	0.96903		1.09345		1.0858	4.63	0.496434	RQSPSPSTRPIRR			GO:0006397	0	0	0.87687		1	0.90365		1	1.0108		1	0.95629	5.6942	2	1.0695	0.42601	2	1.1758	5.7303	2	0.96903		1	1.0281
E9PCT1	Ser/Arg-related nuclear matrix protein;Serine/arginine repetitive matrix protein 1;SR-related nuclear matrix protein of 160 kDa	SRM160;SRRM1	S750	1.06083	27.99	1.0197	46.515	0.686773	52.95	0.882729	45.225	0.953573	47.46	1.03486	34.41	1.08309	36.495	1.07913	39.66	1	KIKKAASPSPQSV			GO:0006397	0	0	1.0671	7.637	6	0.91679	7.3538	6	0.91148	16.619	6	0.9859	20.824	16	0.96593	17.685	16	0.96405	16.558	16	1.0853	12.676	9	1.1109	23.48
E9PCT1	Ser/Arg-related nuclear matrix protein;Serine/arginine repetitive matrix protein 1;SR-related nuclear matrix protein of 160 kDa	SRM160;SRRM1	S752	0.795982		0.95088	12.42	0.844291	70.07	0.470011		1.06291	8.57	1.11466	11.52	0.718415	32.045	0.932982	2.41	1	KKAASPSPQSVRR			GO:0006397	5	0	1.0462		1	1.0553		1	0.87379		1	1.3606		1	1.4942		1	0.92242		1	1.2703	11.813	8	1.2595	13.219
E9PCT1	Ser/Arg-related nuclear matrix protein;Serine/arginine repetitive matrix protein 1;SR-related nuclear matrix protein of 160 kDa	SRM160;SRRM1	S755									0.859682		1.1414		1.27118		1.62398		1	ASPSPQSVRRVSS			GO:0006397	n/a	0																			1.1414		1	1.2207
E9PCT1	Ser/Arg-related nuclear matrix protein;Serine/arginine repetitive matrix protein 1;SR-related nuclear matrix protein of 160 kDa	SRM160;SRRM1	S766									0.874034	10.855	0.885925	54.54	1.15303	16.76	0.659713	38.83	1	SSSRSVSGSPEPA			GO:0006397	n/a	0										0.83524		1	1.2227		1	1.6122		1	1.0992		1	1.2556
E9PCT1	Ser/Arg-related nuclear matrix protein;Serine/arginine repetitive matrix protein 1;SR-related nuclear matrix protein of 160 kDa	SRM160;SRRM1	S768									0.874034	10.855	0.885925	54.54	1.15303	16.76	0.659713	38.83	1	SRSVSGSPEPAAK			GO:0006397	n/a	0										0.83524		1	1.2227		1	1.6122		1	1.0992		1	1.2556
E9PCT1	Ser/Arg-related nuclear matrix protein;Serine/arginine repetitive matrix protein 1;SR-related nuclear matrix protein of 160 kDa	SRM160;SRRM1	S781	1.1167	34	0.738845	14.975	0.721157	17.55	0.880038	20.27	1.072	14.735	0.8696	34.69	0.911689	16.43	0.860821	14.99	0.999994	KPPAPPSPVQSQS			GO:0006397	0	0	0.70575	16.144	21	0.77304	12.737	21	1.1321	16.395	21	0.69969	8.2471	9	0.77881	11.002	9	1.2165	13.633	9	0.8696	34.694	36	0.89311	30.702
E9PCT1	Ser/Arg-related nuclear matrix protein;Serine/arginine repetitive matrix protein 1;SR-related nuclear matrix protein of 160 kDa	SRM160;SRRM1	S787	1.09005		0.72676	13.81	0.727639	18.7	0.811791		1.29731	5.63	0.97027	11.46	0.924696	10.99	1.34916	10.16	0.679649	SPVQSQSPSTNWS			GO:0006397	0	0	0.68158		1	0.80986		1	1.1824		1	0.66672		1	0.64289		1	1.117		1	0.97027	11.459	2	0.9624	0.49665
E9PCT1	Ser/Arg-related nuclear matrix protein;Serine/arginine repetitive matrix protein 1;SR-related nuclear matrix protein of 160 kDa	SRM160;SRRM1	S886	1.02042	15.005	1.0295	24.165	0.915195	34.175	0.966098	17.455	0.978266	15.475	1.13425	23.445	1.19692	22.23	1.23429	20.265	1	PKKETESEAEDNI			GO:0006397	0	0	1.0193	34.66	66	0.91853	25.888	66	0.83236	46.51	66	1.0086	15.943	35	0.93122	15.645	35	0.94828	26.418	35	1.0844	17.778	47	1.089	11.249
E9PCT1	cDNA FLJ57710, highly similar to Serine/arginine repetitive matrix protein 1;Ser/Arg-related nuclear matrix protein;Serine/arginine repetitive matrix protein 1;SR-related nuclear matrix protein of 160 kDa	SRM160;SRRM1	T220	0.935576	20.01	0.83241	12.725	0.883978	17.39	0.978581	26.545	0.958239	11.855	0.912085	13.015	1.07799	11.085	1.1531	11.64	1	PEKKEKTPEIPEP			GO:0006397	0	0	0.79964	15.29	39	0.75388	22.187	39	1.0198	21.737	39	0.87679	23.792	27	0.88172	19.153	27	1.1723	29.299	27	0.96226	11.761	66	1.0602	15.926
E9PCT1	cDNA FLJ57710, highly similar to Serine/arginine repetitive matrix protein 1;Ser/Arg-related nuclear matrix protein;Serine/arginine repetitive matrix protein 1;SR-related nuclear matrix protein of 160 kDa	SRM160;SRRM1	T296	0.951306		0.90238		0.990813		0.691395				0.92705	2.67	0.495388	2.74			0.778488	SRSPSHTRPRRRH			GO:0006397	0	n/a	0.90238		1	0.95827		1	1.098		1	0.94857		1	0.79645		1	0.76619		1	0.92705	2.6698	2	0.65546	50.297
E9PCT1	Ser/Arg-related nuclear matrix protein;Serine/arginine repetitive matrix protein 1;SR-related nuclear matrix protein of 160 kDa	SRM160;SRRM1	T416	1.02085	22.6	0.93278	47.52	0.945466	32.12	0.853055	53.11	1.24189		1.1603	21.81	1.28526	34.24	1.40025		0.994144	KTRHSPTPQQSNR			GO:0006397	0	0	0.93278	47.523	21	0.88259	18.72	21	1.0136	32.117	21	0.91373	22.597	12	0.82017	25.763	12	0.91453	53.114	12	1.1603	21.812	15	1.2765	22.449
E9PCT1			T435	0.546107	8.73	0.53151	34.39	0.714031	43.13	0.937956	8.66	0.45287	2.13	0.77948	1.2	0.991265	17.63	0.434623	18.87	0.544855	SVSPGRTSVTKHK			GO:0006397	0	3	0.53151	34.389	7	1.0928	16.794	7	1.3434	43.129	7	0.97327	8.7285	3	1.675	2.4824	3	1.7647	8.6576	3	0.77948	1.202	2	1.0124	12.759
E9PCT1	Ser/Arg-related nuclear matrix protein;Serine/arginine repetitive matrix protein 1;SR-related nuclear matrix protein of 160 kDa	SRM160;SRRM1	T730	0.906612	149.05	0.79043	15.12	0.800547	13.42	0.642145	21.72	0.975489		0.97783	16.27	0.971093	20.32	1.10065		0.810358	QSPSPSTRPIRRV			GO:0006397	0	0	0.79043	15.124	6	0.86106	18.354	6	1.0128	13.419	6	0.87185	149.05	9	0.78428	174.39	9	0.8124	21.717	9	0.97783	16.273	13	0.99286	10.444
E9PCT1	Ser/Arg-related nuclear matrix protein;Serine/arginine repetitive matrix protein 1;SR-related nuclear matrix protein of 160 kDa	SRM160;SRRM1	T884	0.975252	23.885	1.02676	12.36	0.806407	103.46	0.762641	22.355	0.953117	24.82	1.0663	37.96	1.09104	33.525	1.15512	17.12	1	PEPKKETESEAED			GO:0006397	0	0	1.0658	12.356	21	0.86244	20.129	21	0.82636	103.46	21	0.98183	26.008	12	0.79722	23.914	12	0.92701	16.513	12	1.0371	34.646	9	1.0149	43.342
E9PCT1	Ser/Arg-related nuclear matrix protein;Serine/arginine repetitive matrix protein 1;SR-related nuclear matrix protein of 160 kDa	SRM160;SRRM1	Y616																	0.555729	PPIQRRYSPSPPP			GO:0006397	n/a	n/a
E9PCW1	cDNA FLJ58038, highly similar to Golgi SNAP receptor complex member 1		T52																	0.414223	RRDSSDTTPIING	GO:0005801;GO:0000139;GO:0016021		GO:0006888	n/a	n/a
E9PCW1	cDNA FLJ58038, highly similar to Golgi SNAP receptor complex member 1		T53									1.23191		1.106	25.75	1.05975	16.39	1.23474		0.71853	RDSSDTTPIINGS	GO:0005801;GO:0000139;GO:0016021		GO:0006888	n/a	0																			1.106	25.748	2	1.1612	10.848
E9PDJ3	Cerebral cavernous malformations 2 protein;Malcavernin;Putative uncharacterized protein CCM2	C7orf22;CCM2;PP10187;CCM2	S405	1.37851	3.78	1.3449	5.12	1.26437	18.73	1.49055	25.59	0.970894	21.21	1.1675	25.8	1.4749	23.54	1.38524	18.33	0.999986	RGIITDSFGRHRR				0	0
E9PDT7	110 kDa actin filament-associated protein;Actin filament-associated protein 1	AFAP;AFAP1	S336	0.944318	30.8	0.88459		0.895559		0.825641	36.67			1.319	20.67	1.00695	19.6			0.602728	IGKKKPSTDEQTS		GO:0005543		0	n/a	0.88459		1	1.1366		1	1.0124		1	0.93675	30.796	5	1.0858	31.23	5	0.93336	36.67	5	1.319	20.666	6	0.87315	16.391
E9PDT7	110 kDa actin filament-associated protein;Actin filament-associated protein 1	AFAP;AFAP1	S752																	0.999999	GTSSPQSPVFRHR		GO:0005543		n/a	n/a
E9PDT7	110 kDa actin filament-associated protein;Actin filament-associated protein 1	AFAP;AFAP1	T337	0.944318	30.8	0.88459		0.895559		0.825641	36.67			1.319	20.67	1.00695	19.6			0.504119	GKKKPSTDEQTSS		GO:0005543		0	n/a	0.88459		1	1.1366		1	1.0124		1	0.93675	30.796	5	1.0858	31.23	5	0.93336	36.67	5	1.319	20.666	6	0.87315	16.391
E9PDT7	110 kDa actin filament-associated protein;Actin filament-associated protein 1	AFAP;AFAP1	T341	0.944318	30.8	0.88459		0.895559		0.825641	36.67			1.319	20.67	1.00695	19.6			0.504119	PSTDEQTSSAEED		GO:0005543		0	n/a	0.88459		1	1.1366		1	1.0124		1	0.93675	30.796	5	1.0858	31.23	5	0.93336	36.67	5	1.319	20.666	6	0.87315	16.391
E9PDX1	HCG1741805, isoform CRA_c;Protein phosphatase 1, regulatory (Inhibitor) subunit 9A;Neurabin-1;Neurabin-I;Neural tissue-specific F-actin-binding protein I;Protein phosphatase 1 regulatory subunit 9A	hCG_1741805;PPP1R9A;tcag7.281;KIAA1222;PPP1R9A	S862											1.0232		1.24626				0.498124	IFERRTSIGEVSK				n/a	n/a																			1.0232		1	1.3347
E9PDX1	HCG1741805, isoform CRA_c;Protein phosphatase 1, regulatory (Inhibitor) subunit 9A;Neurabin-1;Neurabin-I;Neural tissue-specific F-actin-binding protein I;Protein phosphatase 1 regulatory subunit 9A	hCG_1741805;PPP1R9A;tcag7.281;KIAA1222;PPP1R9A	T861																	0.498124	NIFERRTSIGEVS				n/a	n/a
E9PEB9	230 kDa bullous pemphigoid antigen;Bullous pemphigoid antigen 1;Dystonia musculorum protein;Dystonin;Hemidesmosomal plaque protein	BPAG1;DMH;DST;DT;KIAA0728	S4148	1.6472	38.96	1.2479	14.62	1.64361	21.05	1.08157	20.11	1.04298	26.46	1.2035	19.76	1.37103	15.02	1.23214	6.01	0.858739	KIKRQKSFSEDVI	GO:0005737;GO:0016021;GO:0015630;GO:0005634	GO:0003779;GO:0005524;GO:0042626;GO:0005509	GO:0007050	0	0	1.2479	14.624	4	1.5253	13.855	4	1.3171	21.047	4	0.75759	38.962	4	1.146	57.87	4	0.86671	20.111	4	1.2035	19.763	6	1.1489	18.26
E9PEH2	EST1-like protein C;Protein SMG7;SMG-7 homolog;Smg-7 homolog, nonsense mediated mRNA decay factor (C. elegans)	C1orf16;EST1C;KIAA0250;SMG7;RP1-127C7.1-003;SMG7	S735	0.891537	25.56	0.82592	23.3	1.13126	34.79	1.0139	24.41	0.652507	9.75	0.74562	29.79	0.739178	7.2	0.523917	34.28	0.997992	VPAIGKSPPHHSG	GO:0005737;GO:0045111	GO:0005488		0	0	0.82592	23.299	6	1.0088	29.066	6	1.3697	34.791	6	0.9264	25.562	12	1.0351	44.426	12	1.2276	24.409	12	0.74562	29.793	3	0.83241	14.249
E9PFD3	Forkhead box protein P1;Putative uncharacterized protein FOXP1;cDNA FLJ35064 fis, clone PEBLM1000147, moderately similar to Glutamine (Q)-rich factor 1, QRF-1	FOXP1;HSPC215;FOXP1	S85									0.642165	14.43	0.947	12.83	1.41018	4.48	1.29067	12.62	0.842274	QVSGIKSPKRNDK	GO:0005634	GO:0043565;GO:0003700;GO:0008270		n/a	0																			0.947	12.832	4	1.3675	4.2304
E9PFM1	Eukaryotic translation initiation factor 4 gamma 1;p220	EIF4F;EIF4G;EIF4G1;EIF4GI	S1099	1.0479	5.02	1.12125	16.415	1.24862	12.56	1.54508	13.39	0.684737	22.19	0.959385	15.215	1.28107	15.275	1.40809	41.5	0.999997	APGGRISWGKGSS		GO:0005488	GO:0016070	0	0	1.0272	12.787	8	1.0902	21.947	8	1.1845	14.865	8										0.73147	24.444	4	1.224	14.948
E9PFM1	Eukaryotic translation initiation factor 4 gamma 1;p220	EIF4F;EIF4G;EIF4G1;EIF4GI	S1194	0.946656	40.35	1.2724	30.07	0.99494	64.7	0.926574	33.55	0.901244	16.19	1.159	16.4	0.945489	30.06	0.622823	21.49	1	ATKRSFSKEVEER		GO:0005488	GO:0016070	0	0	1.2724	30.071	75	1.2173	39.4	75	0.78194	64.698	75	1.3441	40.346	28	1.1003	45.626	28	0.72821	33.55	28	1.159	16.397	45	0.99773	25.119
E9PFM1	Eukaryotic translation initiation factor 4 gamma 1;p220	EIF4F;EIF4G;EIF4G1;EIF4GI	S1238	1.09936	1.83	0.97777	1.94	0.863166	7.97	1.17156	3.48	0.830235	8.745	0.95365	3.91	1.11186	1.72	0.75655	4.12	1	AAIPPVSPIKAAI		GO:0005488	GO:0016070	0	0
E9PFM1	Eukaryotic translation initiation factor 4 gamma 1;p220	EIF4F;EIF4G;EIF4G1;EIF4GI	S1603	0.598603	20.38	0.57084	77.13	0.594501	14.9	0.583969	25.87	1.03591	20.7	0.997335	22.08	0.969574	33.08	1.05113	24.26	1	REAEEESDHN___		GO:0005488	GO:0016070	0	0	0.11648		1	0.15647		1	1.0022		1										0.97177		1	0.70287
E9PFM1	Eukaryotic translation initiation factor 4 gamma 1;p220;Putative uncharacterized protein EIF4G1;Putative uncharacterized protein EIF4G1;Putative uncharacterized protein EIF4G1;Putative uncharacterized protein EIF4G1;Putative uncharacterized protein EIF4G1;Putative uncharacterized protein EIF4G1;Putative uncharacterized protein EIF4G1;Putative uncharacterized protein EIF4G1	EIF4F;EIF4G;EIF4G1;EIF4GI;EIF4G1;EIF4G1;EIF4G1;EIF4G1;EIF4G1;EIF4G1;EIF4G1;EIF4G1	T214	1.01117	1.27	0.71697	16.01	0.579713	21.5	0.583492	7.03	0.608594	22.34	0.52207		0.479114		0.326497	6.76	0.531852	RTASTPTPPQTGG		GO:0005488	GO:0016070	0	2	0.71697	16.005	2	0.56011	23.997	2	0.80856	21.503	2	0.70905	1.2746	3	0.55731	4.3614	3	0.81383	7.0254	3	0.52207		1	0.46866
E9PFP4	Ribonuclease P protein subunit p30;RNase P subunit 2;Putative uncharacterized protein RPP30;Ribonuclease P (30kD) (RPP30)	RNASEP2;RPP30;RPP30;RP11-320F15.1;RP11-320F15.1-006	S273	1.19693	15.74	0.89955	16.04	0.942818	35.42	0.715763	43.93	0.852884	3.05	0.98346	7.08	0.752573	17.22	0.87285	16.04	1	VKKPRPSEGDEDC		GO:0004540	GO:0008033	0	0	0.89955	16.039	12	0.80571	21.301	12	1.0481	35.418	12	0.75155	15.742	8	0.62215	27.147	8	0.79569	43.925	8	0.98346	7.0755	9	0.73714	9.9812
E9PG89	ATP-dependent helicase CHD3;Chromodomain-helicase-DNA-binding protein 3;Mi-2 autoantigen 240 kDa protein;Mi2-alpha;Zinc finger helicase	CHD3	S132	0.150228	8.19	0.17132		0.0601504		0.185608	12.81	0.47189	25.47	0.40844	18.09	0.36421	96.69	0.402252	9.96	0.999937	KRKKRDSEEEFGS		GO:0005524;GO:0008026;GO:0003677;GO:0008270	GO:0006355	7	7	0.17132		1	1.3339		1	0.3511		1	1.1404	8.1938	3	1.0376	3.4387	3	1.0834	12.811	3	0.40844	18.094	4	0.59348	31.132
E9PG89	ATP-dependent helicase CHD3;Chromodomain-helicase-DNA-binding protein 3;Mi-2 autoantigen 240 kDa protein;Mi2-alpha;Zinc finger helicase	CHD3	S138	0.866203	8.89	1.008	23.49	0.496561	18.06	0.758036	33.73	1.03126	25.47	0.8926	24.45	0.496901	39.14	0.879077	9.96	0.995721	SEEEFGSERDEYR		GO:0005524;GO:0008026;GO:0003677;GO:0008270	GO:0006355	6	6	1.008	23.486	3	0.87636	24.486	3	0.49262	18.056	3	1.1637	8.8945	7	1	13.154	7	0.75202	33.728	7	0.8926	24.447	4	0.90071	6.9314
E9PG89	ATP-dependent helicase CHD3;Chromodomain-helicase-DNA-binding protein 3;Mi-2 autoantigen 240 kDa protein;Mi2-alpha;Zinc finger helicase	CHD3	S1660	1.1129	18.955	0.78117	15.07	0.667596	9.93	0.742572	16.815	0.903295	15.37	0.81456	19.755	0.821288	26.785	0.841066	25.985	1	TEADAPSPAPSIG		GO:0005524;GO:0008026;GO:0003677;GO:0008270	GO:0006355	0	0	0.96908	4.1599	5	0.76962	6.7835	5	0.79925	12.251	5	0.71981	22.083	5	0.60672	31.377	5	0.82578	27.172	5	1.0109	11.195	4	0.97289	3.2911
E9PG89	ATP-dependent helicase CHD3;Chromodomain-helicase-DNA-binding protein 3;Mi-2 autoantigen 240 kDa protein;Mi2-alpha;Zinc finger helicase	CHD3	S656																	0.999595	PPIDYGSGEDDGK		GO:0005524;GO:0008026;GO:0003677;GO:0008270	GO:0006355	n/a	n/a
E9PG89			S66	3.42098		0.35934	9.7	0.464555	20.16	2.64708				0.55909	31.9	0.521765	42.78			1	RGRDRHSPPGCHI		GO:0005524;GO:0008026;GO:0003677;GO:0008270	GO:0006355	8	n/a	0.35934	9.7016	4	0.47206	12.649	4	1.2928	20.164	4	0.10504		1	0.30809		1	7.3665		1	0.55909	31.9	4	0.56136	58.987
E9PG89	ATP-dependent helicase CHD3;Chromodomain-helicase-DNA-binding protein 3;Mi-2 autoantigen 240 kDa protein;Mi2-alpha;Zinc finger helicase	CHD3	S772																	0.874723	GDGPPSSPTNDPT		GO:0005524;GO:0008026;GO:0003677;GO:0008270	GO:0006355	n/a	n/a
E9PGC5	PTPRK protein;Protein tyrosine phosphatase, receptor type, K;Receptor-type tyrosine-protein phosphatase kappa	PTPRK;PTPRK;RP3-480J14.1-004;PTPK;PTPRK	T881	1.26624	38.6	0.96381	44.28	0.90708	46.69	0.963376	29.85	1.47033		0.72596	17.69	0.851043	17.06	0.465144		0.797527	RYICEGTESPYQT	GO:0016020	GO:0004725		0	5	0.96381	44.277	3	0.84557	47.488	3	0.94114	46.688	3	0.76116	38.6	7	0.85918	13.313	7	0.99955	29.846	7	0.72596	17.69	9	0.73648	22.368
E9PGD0	Stromal interaction molecule 2	KIAA1482;STIM2	S721	1.17909	46.48	1.027	21.26	1.202	14.8	0.916094	40	1.27292	29.46	1.0968	12.27	0.963912	28.54	0.858246	39.51	0.999846	ISPRKISRDEVSI				0	0	1.027	21.264	4	1.33	12.689	4	1.1704	14.8	4	0.87101	46.481	4	1.5345	27.849	4	0.89201	40.001	4	1.0968	12.269	9	0.97155	20.858
E9PGD0	Stromal interaction molecule 2	KIAA1482;STIM2	S726	1.24753	42.49	1.2184	12.88	1.09504	4.16	1.13746	37.43	1.29846	17.81	1.1027	22.97	1.0261	19.24	1.19897	21.19	0.999622	ISRDEVSIEDSSR				0	0	1.2184	12.877	2	1.3478	22.673	2	0.89875	4.1596	2	0.97665	42.489	5	1.8108	26.523	5	0.93357	37.428	5	1.1027	22.971	14	1.2958	20.612
E9PGD0	Stromal interaction molecule 2	KIAA1482;STIM2	S814	0.895392	33.33	0.7891	44.94	0.690273	22.4	0.775022	22.26	0.934474	35.95	0.86636	16.18	1.08642	18.47	1.07151	14.7	0.997369	SVARISSIPHDIC				0	0	0.7891	44.944	6	0.80376	11.606	6	0.87476	22.4	6	0.88129	33.332	24	0.88313	50.566	24	0.98216	22.258	24	0.86636	16.18	14	1.1031	21.324
E9PH93	Putative uncharacterized protein TBC1D15	TBC1D15	S209																	0.48487	VNCQNKSISQSFE	GO:0005622	GO:0005097		n/a	n/a
E9PH93	GTPase-activating protein RAB7;TBC1 domain family member 15;cDNA FLJ77374;TBC1 domain family, member 15, isoform CRA_d	TBC1D15;hCG_25175;TBC1D15	S666	0.836116		1.0117	9.02	0.743084	8.91	0.678213		0.714635	13.96	0.82133	11.5	1.16325	22.48	0.816188	9.39	0.986476	SGARNDSPTQIPV	GO:0005622	GO:0005097		0	0	1.0117	9.021	5	0.70099	7.6039	5	0.73449	8.9128	5	1.21		1	1.0604		1	0.67037		1	0.82133	11.495	2	1.0588	37.458
E9PH93	GTPase-activating protein RAB7;TBC1 domain family member 15	TBC1D15	S78			1.366	50.71	1.49222	16.16											0.333333	IYARKDSSSVVEW	GO:0005622	GO:0005097		n/a	n/a	1.366	50.707	5	1.3907	15.001	5	1.0924	16.157	5
E9PH93	GTPase-activating protein RAB7;TBC1 domain family member 15	TBC1D15	S79																	0.333333	YARKDSSSVVEWT	GO:0005622	GO:0005097		n/a	n/a
E9PH93	GTPase-activating protein RAB7;TBC1 domain family member 15	TBC1D15	S80																	0.333333	ARKDSSSVVEWTQ	GO:0005622	GO:0005097		n/a	n/a
E9PHQ3	Phosphoinositol 3-phosphate-binding protein 2;Pleckstrin homology domain-containing family A member 5;cDNA FLJ59284, highly similar to Pleckstrin homology domain-containing family A member 5;PLEKHA5 protein	KIAA1686;PEPP2;PLEKHA5;PLEKHA5	S1021									0.904787		1.2021		1.28132		1.26208		0.427469	VPPRAKSPTPESS		GO:0005543		n/a	0																			1.2021		1	1.2025
E9PHQ3	Phosphoinositol 3-phosphate-binding protein 2;Pleckstrin homology domain-containing family A member 5;cDNA FLJ59284, highly similar to Pleckstrin homology domain-containing family A member 5;PLEKHA5 protein	KIAA1686;PEPP2;PLEKHA5;PLEKHA5	S1026			1.367		1.21361												0.240029	KSPTPESSTIASY		GO:0005543		n/a	n/a	1.367		1	1.2676		1	0.88779		1
E9PHQ3	Phosphoinositol 3-phosphate-binding protein 2;Pleckstrin homology domain-containing family A member 5;cDNA FLJ59284, highly similar to Pleckstrin homology domain-containing family A member 5;PLEKHA5 protein	KIAA1686;PEPP2;PLEKHA5;PLEKHA5	S1027																	0.240029	SPTPESSTIASYV		GO:0005543		n/a	n/a
E9PHQ3	Phosphoinositol 3-phosphate-binding protein 2;Pleckstrin homology domain-containing family A member 5;cDNA FLJ59284, highly similar to Pleckstrin homology domain-containing family A member 5;PLEKHA5 protein	KIAA1686;PEPP2;PLEKHA5;PLEKHA5	T1023	1.01115	12.8	1.1422	16.82	1.17395	21.48	1.11476	28.81	0.977976	28.59	1.0613	17.49	1.13782	9.41	1.09898	14.69	0.484513	PRAKSPTPESSTI		GO:0005543		0	0	1.1422	16.816	11	1.0378	25.663	11	1.0278	21.484	11	1.1296	12.803	4	1.0943	22.438	4	0.97598	28.811	4	1.0613	17.494	7	1.0296	17.153
E9PHR4			S854																	0.997549	HPAIPRSRSRPSA				n/a	n/a
E9PHR4			S859																	0.919074	RSRSRPSASPIRG				n/a	n/a
E9PHX7	Arf-GAP domain and FG repeats-containing protein 1;HIV-1 Rev-binding protein;Nucleoporin-like protein RIP;Rev/Rex activation domain-binding protein;Rev-interacting protein;Putative uncharacterized protein AGFG1;Putative uncharacterized protein AGFG1	AGFG1;HRB;RAB;RIP;AGFG1;AGFG1	S179	0.866616	12.38	0.91402	9.14	1.49451	2.89	1.71178	16.62	0.714445	16.25	0.8319		1.22822		0.917336	22.53	0.529116	INKGTPSQSPVVG	GO:0005794	GO:0008060;GO:0008270	GO:0032312	0	0	0.91402	9.1437	3	1.6568	10.265	3	1.6351	2.8943	3	1.0547	12.381	4	1.8852	18.796	4	1.8728	16.62	4	0.8319		1	1.1698
E9PHY5	Putative uncharacterized protein DKFZp781H1755;cDNA FLJ58484, highly similar to Band 4.1-like protein 2;Band 4.1-like protein 2;Generally expressed protein 4.1	DKFZp781H1755;EPB41L2	S598	1.25161	36.62	1.1384	21.84	1.65683	27.95	0.919087	25.52	1.13045	18.35	1.1569	15.41	1.30996	23.08	1.35207	5.85	0.892274	GRREVRSPTKAPH	GO:0030054;GO:0005737;GO:0005856;GO:0019898;GO:0005634;GO:0005886	GO:0003779;GO:0005198		0	0	1.1384	21.842	18	1.2843	16.136	18	1.4554	27.953	18	0.90955	36.618	10	0.95491	27.292	10	0.80735	25.523	10	1.1569	15.411	41	1.2717	19.702
E9PHY5			S612	0.978063		1.0522	17.89	0.960953	18.94	1.10976		1.08951	28.21	1.3742	6.44	1.11625	27.46	1.02888	26.34	0.499515	QIIEGKSSHETIN	GO:0030054;GO:0005737;GO:0005856;GO:0019898;GO:0005634;GO:0005886	GO:0003779;GO:0005198		0	0	1.0522	17.889	2	1.162	4.3613	2	0.91328	18.936	2	1.0758		1	1.311		1	1.0547		1	1.3742	6.444	3	1.0762	11.486
E9PHY5			S613											1.1296		1.06108				0.499515	IIEGKSSHETINI	GO:0030054;GO:0005737;GO:0005856;GO:0019898;GO:0005634;GO:0005886	GO:0003779;GO:0005198		n/a	n/a																			1.1296		1	0.98945
E9PHY5	Band 4.1-like protein 2;Generally expressed protein 4.1;4.1G isoform	EPB41L2;EPB41L2	S645	0.696798		0.82041	2.07	0.734218	14.23	0.893673		0.758267		0.86599	4.69	0.750718	14.27	0.875442		0.999954	MNGKEISPGSGPG	GO:0030054;GO:0005737;GO:0005856;GO:0019898;GO:0005634;GO:0005886	GO:0003779;GO:0005198		0	0
E9PHY5			T616	1.02237	13.01	1.0173	15.68	1.20845	17.49	0.772894	15.69	1.00488	8.46	1.2976	8.3	1.40361	6.47	1.17072	14.66	0.333333	GKSSHETINIVEE	GO:0030054;GO:0005737;GO:0005856;GO:0019898;GO:0005634;GO:0005886	GO:0003779;GO:0005198		0	0	1.0173	15.679	4	1.3194	23.145	4	1.1879	17.49	4	0.99504	13.01	4	0.99071	4.7374	4	0.75975	15.685	4	1.2976	8.3009	3	1.3633	11.93
E9PK25	18 kDa phosphoprotein;Cofilin, non-muscle isoform;Cofilin-1	CFL;CFL1	S41	1.75403	20.77	1.72705	40.49	1.71714	24.725	2.52313	31.15	0.576111	27.465	1.12685	14.35	1.65494	25.7	0.911105	24.665	1	GYVRPASGVAVSD	GO:0005622	GO:0003779		4	0	1.3405	19.805	11	1.683	21.742	11	1.2042	8.5879	11	1.3079	13.056	8	2.3033	22.463	8	1.8844	20.993	8	0.69519	13.917	9	1.0938	20.796
E9PKC0	Pleckstrin homology domain-containing family A member 7	PLEKHA7	S536	0.873606		0.86957	79.48	0.901396	35.05	0.953397		0.916812	31.07	0.92543	17.73	0.851016	18.21	0.784765	30.65	0.875727	QQFRHGSPTAPIC	GO:0030054;GO:0005737;GO:0005634	GO:0005543		0	0	0.86957	79.479	4	1.0371	28.886	4	1.0366	35.049	4	0.99538		1	1.125		1	1.0964		1	0.92543	17.726	5	0.84451	21.301
E9PKC0	Pleckstrin homology domain-containing family A member 7	PLEKHA7	S867									0.802265	11.37	0.7056	13.49	0.3743	66.52	0.670694	34.96	0.654068	KPPPQPSPPTSPV	GO:0030054;GO:0005737;GO:0005634	GO:0005543		n/a	1										0.6739	7.548	3	0.73964	24.859	3	0.99066	17.482	3	0.7056	13.487	4	0.6138	6.659
E9PKC0	Pleckstrin homology domain-containing family A member 7	PLEKHA7	S871									0.802265	11.37	0.7056	13.49	0.3743	66.52	0.670694	34.96	0.691131	QPSPPTSPVRTPI	GO:0030054;GO:0005737;GO:0005634	GO:0005543		n/a	1										0.6739	7.548	3	0.73964	24.859	3	0.99066	17.482	3	0.7056	13.487	4	0.6138	6.659
E9PKC0	Pleckstrin homology domain-containing family A member 7	PLEKHA7	S903	1.06795	11.97	1.1445	14.58	1.48911	20.24	1.42622	10.72	0.94032	20.38	1.2006	14.89	1.54985	8.81	1.30793	12.71	0.990689	QIRKVTSPIQSPT	GO:0030054;GO:0005737;GO:0005634	GO:0005543		0	0	1.1445	14.575	18	1.4092	14.105	18	1.3011	20.236	18	1.2322	11.97	16	1.3281	10.363	16	1.2493	10.724	16	1.2006	14.894	14	1.4389	12.361
E9PKC0	Pleckstrin homology domain-containing family A member 7	PLEKHA7	S907	1.03753	11.35	1.1119	14.82	1.45247	21.47	1.38559	12.73	0.930474	20.66	1.1911	13.47	1.60024	9.06	1.29604	12.33	0.997526	VTSPIQSPTKAKP	GO:0030054;GO:0005737;GO:0005634	GO:0005543		0	0	1.1119	14.82	16	1.3904	14.782	16	1.3063	21.467	16	1.2322	11.352	16	1.3281	10.24	16	1.2493	12.726	16	1.1911	13.474	12	1.424	12.353
E9PKC0	Pleckstrin homology domain-containing family A member 7	PLEKHA7	T870									0.802265	11.37	0.7056	13.49	0.3743	66.52	0.670694	34.96	0.654069	PQPSPPTSPVRTP	GO:0030054;GO:0005737;GO:0005634	GO:0005543		n/a	1										0.6739	7.548	3	0.73964	24.859	3	0.99066	17.482	3	0.7056	13.487	4	0.6138	6.659
E9PN30	Selenoprotein S;VCP-interacting membrane protein;Selenoprotein S;VIMP	AD-015;SBBI8;SELS;VIMP;hCG_28037;SELS	S180	1.08367	45.36	0.68218	32.85	0.979406	27.9	0.724134	93.44	1.03808	26.54	0.84942	169.84	0.869466	23.76	0.811731	30.99	0.999735	KPQEEDSPGPSTS	GO:0030176	GO:0008430	GO:0006886	0	0	0.68218	32.852	5	1.5354	27.777	5	1.4357	27.902	5	0.62951	45.358	4	0.64636	72.757	4	1.0615	93.442	4	0.84942	169.84	10	0.88904	24.814
E9PPM1	p53-induced gene 11 protein;Tumor protein p53-inducible protein 11	PIG11;TP53I11	S14	0.93343	28.375	0.8723	28.455	0.619861	96.675	0.880835	76.64	1.85135	99.5	1.44472	29.475	1.52705	117.31	0.780351	106.48	0.999792	PIMKKHSQTDIVS				0	0	0.9535	17.977	31	0.78995	39.534	31	0.72219	90.819	31	1.0488	23.133	32	1.0004	31.787	32	0.96527	35.137	32	1.9444	33.547	19	1.7679	25.048
E9PPM1	p53-induced gene 11 protein;Tumor protein p53-inducible protein 11	PIG11;TP53I11	T16	0.882937	41.89	0.95834		0.248977		0.926006	44.74	1.36935	15.63	1.7881	16.15	1.55769	18.34	1.72984	6.73	0.5	MKKHSQTDIVSRI				6	0	0.95834		1	0.56365		1	0.2598		1	1.0854	41.886	3	1.0929	7.9318	3	0.96626	44.743	3	1.7881	16.15	4	1.528	16.658
E9PQ01	Pre-mRNA cleavage complex 2 protein Pcf11;Pre-mRNA cleavage complex II protein Pcf11	KIAA0824;PCF11	S487	0.731613	14.02	0.78268	19.47	0.888968	29.71	1.06805	5.65	0.915396		0.6071	57.56	0.784312	22.04	0.747279		0.840315	RSRSPKSRSPIIH				0	0	0.78268	19.47	2	1.2441	7.4363	2	1.1358	29.707	2	1.0698	14.017	10	1.2748	13.423	10	1.3646	5.6499	10	0.6071	57.56	2	1.0504	17.685
E9PQ01	Pre-mRNA cleavage complex 2 protein Pcf11;Pre-mRNA cleavage complex II protein Pcf11	KIAA0824;PCF11	S494	1.00123	11.06	1.0596	17.39	1.44667	14.38	1.47284	8.13	0.878742	31.14	0.91231	23.09	1.31245	17.21	1.1777	15.04	0.999997	RSPIIHSPKRRDR				0	0	1.0596	17.394	18	1.3205	10.59	18	1.3653	14.38	18	1.0583	11.056	19	1.2776	11.728	19	1.39	8.1253	19	0.91231	23.089	23	1.1667	14.64
E9PQ01			S800	1.17115	23.3	1.25395	118.6	1.1652	33.06	1.3337	26.18	1.05944	23.73	1.1568	7.32	1.53183	10.62	1.16878	28.675	0.999925	ERARRISPISGSR				0	0	1.0417	118.6	5	1.2205	37.315	5	1.2734	33.06	5	1.0707	23.303	10	1.053	24.523	10	1.0636	26.181	10	1.1568	7.3154	3	1.3637	15.057
E9PQ01	Pre-mRNA cleavage complex 2 protein Pcf11;Pre-mRNA cleavage complex II protein Pcf11	KIAA0824;PCF11	S836	0.990127	9.99	0.90655	27.47	1.17407	22.57	1.42655	19.12	0.894998	22.92	0.90896	21.65	1.25836	15.64	1.06621	16.88	1	VREEQRSPFNDRF				0	0	0.90655	27.471	11	1.138	27.342	11	1.2951	22.567	11	0.91559	9.9858	16	1.3568	13.675	16	1.5736	19.121	16	0.90896	21.651	24	1.0747	14.414
E9PQG7	ALL-1;C-terminal cleavage product of 180 kDa;CXXC-type zinc finger protein 7;Histone-lysine N-methyltransferase MLL;Lysine N-methyltransferase 2A;MLL cleavage product C180;MLL cleavage product N320;N-terminal cleavage product of 320 kDa;Trithorax-like protein;Zinc finger protein HRX	ALL1;CXXC7;HRX;HTRX;KMT2A;MLL;MLL1;TRX1	S1114																	0.402424	MGNDDKSSIAGSE	GO:0035097	GO:0003677;GO:0042800;GO:0008270	GO:0006355	n/a	n/a
E9PQG7	ALL-1;C-terminal cleavage product of 180 kDa;CXXC-type zinc finger protein 7;Histone-lysine N-methyltransferase MLL;Lysine N-methyltransferase 2A;MLL cleavage product C180;MLL cleavage product N320;N-terminal cleavage product of 320 kDa;Trithorax-like protein;Zinc finger protein HRX	ALL1;CXXC7;HRX;HTRX;KMT2A;MLL;MLL1;TRX1	S1115																	0.402424	GNDDKSSIAGSED	GO:0035097	GO:0003677;GO:0042800;GO:0008270	GO:0006355	n/a	n/a
E9PQG7	ALL-1;C-terminal cleavage product of 180 kDa;CXXC-type zinc finger protein 7;Histone-lysine N-methyltransferase MLL;Lysine N-methyltransferase 2A;MLL cleavage product C180;MLL cleavage product N320;N-terminal cleavage product of 320 kDa;Trithorax-like protein;Zinc finger protein HRX	ALL1;CXXC7;HRX;HTRX;KMT2A;MLL;MLL1;TRX1	S136									0.917501	10.3	0.94576	17.96	0.885298	8.72	0.851307	7.72	0.820538	RAVFGESGGGGGS	GO:0035097	GO:0003677;GO:0042800;GO:0008270	GO:0006355	n/a	0										1.1374	10.303	5	0.88624	7.4091	5	0.75907	9.6342	5	0.94576	17.96	4	0.89582	9.3507
E9PQG7	ALL-1;C-terminal cleavage product of 180 kDa;CXXC-type zinc finger protein 7;Histone-lysine N-methyltransferase MLL;Lysine N-methyltransferase 2A;MLL cleavage product C180;MLL cleavage product N320;N-terminal cleavage product of 320 kDa;Trithorax-like protein;Zinc finger protein HRX	ALL1;CXXC7;HRX;HTRX;KMT2A;MLL;MLL1;TRX1	S153									1.0653	13.44	1.0504	19.85	1.00089	7.62	0.945497	7.14	1	QFIGFGSDEEVRV	GO:0035097	GO:0003677;GO:0042800;GO:0008270	GO:0006355	n/a	0										1.1171	15.077	6	0.88122	7.8601	6	0.77593	8.9377	6	1.0504	19.845	5	0.90631	10.513
E9PQG7	ALL-1;C-terminal cleavage product of 180 kDa;CXXC-type zinc finger protein 7;Histone-lysine N-methyltransferase MLL;Lysine N-methyltransferase 2A;MLL cleavage product C180;MLL cleavage product N320;N-terminal cleavage product of 320 kDa;Trithorax-like protein;Zinc finger protein HRX;MLL	ALL1;CXXC7;HRX;HTRX;KMT2A;MLL;MLL1;TRX1;MLL	S161									1.19836	78.59	1.0251	86.15	0.193734	100.91	0.666664	66.79	0.939954	EEVRVRSPTRSPS	GO:0035097	GO:0003677;GO:0042800;GO:0008270	GO:0006355	n/a	6													5.1718		1	1.1869		1	1.0251	86.152	5	1.1696	20.091
E9PQG7	ALL-1;C-terminal cleavage product of 180 kDa;CXXC-type zinc finger protein 7;Histone-lysine N-methyltransferase MLL;Lysine N-methyltransferase 2A;MLL cleavage product C180;MLL cleavage product N320;N-terminal cleavage product of 320 kDa;Trithorax-like protein;Zinc finger protein HRX;MLL	ALL1;CXXC7;HRX;HTRX;KMT2A;MLL;MLL1;TRX1;MLL	S165	0.817211	13.57	0.94772		0.771074		1.09585	27.4	1.05043	27.22	1.0475	190.61	0.619774	218	0.703176	45.01	0.997017	VRSPTRSPSVKTS	GO:0035097	GO:0003677;GO:0042800;GO:0008270	GO:0006355	0	0	0.94772		1	1.3313		1	0.81361		1	1.1597	13.566	7	1.228	22.092	7	1.1563	27.402	7	1.0475	190.61	5	1.081	280.35
E9PQG7	ALL-1;C-terminal cleavage product of 180 kDa;CXXC-type zinc finger protein 7;Histone-lysine N-methyltransferase MLL;Lysine N-methyltransferase 2A;MLL cleavage product C180;MLL cleavage product N320;N-terminal cleavage product of 320 kDa;Trithorax-like protein;Zinc finger protein HRX;MLL	ALL1;CXXC7;HRX;HTRX;KMT2A;MLL;MLL1;TRX1;MLL	S167	0.988195	25.14	1.1133	25.69	0.862028	28.89	1.22251	41.26	1.21518	18.97	1.2537	57.04	0.735822	66.5	0.93506	57.8	0.999999	SPTRSPSVKTSPR	GO:0035097	GO:0003677;GO:0042800;GO:0008270	GO:0006355	0	0	1.1133	25.685	10	1.3224	18.764	10	0.7743	28.886	10	1.1266	25.143	8	1.1995	18.438	8	1.0981	41.257	8	1.2537	57.042	8	1.1871	7.2194
E9PQG7	ALL-1;C-terminal cleavage product of 180 kDa;CXXC-type zinc finger protein 7;Histone-lysine N-methyltransferase MLL;Lysine N-methyltransferase 2A;MLL cleavage product C180;MLL cleavage product N320;N-terminal cleavage product of 320 kDa;Trithorax-like protein;Zinc finger protein HRX	ALL1;CXXC7;HRX;HTRX;KMT2A;MLL;MLL1;TRX1	S1687																	0.428161	ESIPSRSSPEGPD	GO:0035097	GO:0003677;GO:0042800;GO:0008270	GO:0006355	n/a	n/a
E9PQG7	ALL-1;C-terminal cleavage product of 180 kDa;CXXC-type zinc finger protein 7;Histone-lysine N-methyltransferase MLL;Lysine N-methyltransferase 2A;MLL cleavage product C180;MLL cleavage product N320;N-terminal cleavage product of 320 kDa;Trithorax-like protein;Zinc finger protein HRX	ALL1;CXXC7;HRX;HTRX;KMT2A;MLL;MLL1;TRX1	S1688																	0.428161	SIPSRSSPEGPDP	GO:0035097	GO:0003677;GO:0042800;GO:0008270	GO:0006355	n/a	n/a
E9PQG7	ALL-1;C-terminal cleavage product of 180 kDa;CXXC-type zinc finger protein 7;Histone-lysine N-methyltransferase MLL;Lysine N-methyltransferase 2A;MLL cleavage product C180;MLL cleavage product N320;N-terminal cleavage product of 320 kDa;Trithorax-like protein;Zinc finger protein HRX	ALL1;CXXC7;HRX;HTRX;KMT2A;MLL;MLL1;TRX1	S1840	0.992803		0.70903	55.58	0.421958	86.09	0.422802		1.0398	14.2	0.70772	15.47	0.584651	23.03	0.438539	28.55	0.950419	GPGEPDSPTPIHP	GO:0035097	GO:0003677;GO:0042800;GO:0008270	GO:0006355	2	2	0.70903	55.584	7	0.46287	54.583	7	0.59512	86.088	7	0.71417		1	0.41821		1	0.59631		1	0.79029	15.465	5	0.5752	25.766
E9PQG7	ALL-1;C-terminal cleavage product of 180 kDa;CXXC-type zinc finger protein 7;Histone-lysine N-methyltransferase MLL;Lysine N-methyltransferase 2A;MLL cleavage product C180;MLL cleavage product N320;N-terminal cleavage product of 320 kDa;Trithorax-like protein;Zinc finger protein HRX	ALL1;CXXC7;HRX;HTRX;KMT2A;MLL;MLL1;TRX1	S1857	0.928341	5.4	1.06523	10.295	1.02406	7.25	0.461876	17.25	0.802371	6.155	0.7257	10.59	0.653362	15.94	0.659683	18.355	0.860448	IISTDRSREDSPE	GO:0035097	GO:0003677;GO:0042800;GO:0008270	GO:0006355	5	0	0.82825	17.023	9	0.73084	8.8191	9	0.94998	11.937	9	0.7945	5.3976	3	0.65427	13.295	3	0.70882	17.252	3	0.7257	10.589	7	0.74241	9.9291
E9PQG7	ALL-1;C-terminal cleavage product of 180 kDa;CXXC-type zinc finger protein 7;Histone-lysine N-methyltransferase MLL;Lysine N-methyltransferase 2A;MLL cleavage product C180;MLL cleavage product N320;N-terminal cleavage product of 320 kDa;Trithorax-like protein;Zinc finger protein HRX	ALL1;CXXC7;HRX;HTRX;KMT2A;MLL;MLL1;TRX1	S2124																	0.885818	EIISPPSPDRPPH	GO:0035097	GO:0003677;GO:0042800;GO:0008270	GO:0006355	n/a	n/a
E9PQG7	ALL-1;C-terminal cleavage product of 180 kDa;CXXC-type zinc finger protein 7;Histone-lysine N-methyltransferase MLL;Lysine N-methyltransferase 2A;MLL cleavage product C180;MLL cleavage product N320;N-terminal cleavage product of 320 kDa;Trithorax-like protein;Zinc finger protein HRX	ALL1;CXXC7;HRX;HTRX;KMT2A;MLL;MLL1;TRX1	S2167											0.68932	34.52	0.90039	15.36			0.538295	GCRPIPSAGSPTP	GO:0035097	GO:0003677;GO:0042800;GO:0008270	GO:0006355	n/a	n/a																			0.68932	34.519	2	0.97839	2.1581
E9PQG7	ALL-1;C-terminal cleavage product of 180 kDa;CXXC-type zinc finger protein 7;Histone-lysine N-methyltransferase MLL;Lysine N-methyltransferase 2A;MLL cleavage product C180;MLL cleavage product N320;N-terminal cleavage product of 320 kDa;Trithorax-like protein;Zinc finger protein HRX	ALL1;CXXC7;HRX;HTRX;KMT2A;MLL;MLL1;TRX1	S2170																	0.328804	PIPSAGSPTPTTH	GO:0035097	GO:0003677;GO:0042800;GO:0008270	GO:0006355	n/a	n/a
E9PQG7	ALL-1;C-terminal cleavage product of 180 kDa;CXXC-type zinc finger protein 7;Histone-lysine N-methyltransferase MLL;Lysine N-methyltransferase 2A;MLL cleavage product C180;MLL cleavage product N320;N-terminal cleavage product of 320 kDa;Trithorax-like protein;Zinc finger protein HRX	ALL1;CXXC7;HRX;HTRX;KMT2A;MLL;MLL1;TRX1	S2204	0.953285	6.28	1.155	18.09	1.28886	11.06	1.51513	5.25	1.21976	34.71	1.2201	46.655	1.37798	21.685	1.66666	14.85	0.980135	HSTSSISPQRSKI	GO:0035097	GO:0003677;GO:0042800;GO:0008270	GO:0006355	0	0	1.155	18.088	5	1.3989	16.615	5	1.1159	11.063	5	1.2116	6.283	6	1.2487	8.4058	6	1.3118	5.2515	6	1.3761	62.897	9	1.4031	11.332
E9PQG7	ALL-1;C-terminal cleavage product of 180 kDa;CXXC-type zinc finger protein 7;Histone-lysine N-methyltransferase MLL;Lysine N-methyltransferase 2A;MLL cleavage product C180;MLL cleavage product N320;N-terminal cleavage product of 320 kDa;Trithorax-like protein;Zinc finger protein HRX	ALL1;CXXC7;HRX;HTRX;KMT2A;MLL;MLL1;TRX1	S2394	1.00046		1.0942	13.92	1.0753	15.17	0.557703		0.945174	16.54	1.0654	27.79	0.777518	17.04	1.05859	23.58	0.999801	STQSANSSPDEDT	GO:0035097	GO:0003677;GO:0042800;GO:0008270	GO:0006355	0	0	1.0942	13.917	5	0.81924	18.92	5	0.98273	15.17	5	1.0937		1	1.1946		1	0.50969		1	1.0654	27.785	4	0.71384	33.306
E9PQG7	ALL-1;C-terminal cleavage product of 180 kDa;CXXC-type zinc finger protein 7;Histone-lysine N-methyltransferase MLL;Lysine N-methyltransferase 2A;MLL cleavage product C180;MLL cleavage product N320;N-terminal cleavage product of 320 kDa;Trithorax-like protein;Zinc finger protein HRX	ALL1;CXXC7;HRX;HTRX;KMT2A;MLL;MLL1;TRX1	S2869																	0.600688	MQAIGESPESSSS	GO:0035097	GO:0003677;GO:0042800;GO:0008270	GO:0006355	n/a	n/a
E9PQG7	ALL-1;C-terminal cleavage product of 180 kDa;CXXC-type zinc finger protein 7;Histone-lysine N-methyltransferase MLL;Lysine N-methyltransferase 2A;MLL cleavage product C180;MLL cleavage product N320;N-terminal cleavage product of 320 kDa;Trithorax-like protein;Zinc finger protein HRX	ALL1;CXXC7;HRX;HTRX;KMT2A;MLL;MLL1;TRX1	S3039	0.870008	4.06	0.810125	7.08	0.558747	15.4	0.860029	19.28	1.16185	24.25	0.959295	1.92	0.752831	15.53	0.88141	17.225	0.925372	GIQVPVSPTVPIQ	GO:0035097	GO:0003677;GO:0042800;GO:0008270	GO:0006355	0	0	0.87219	7.0782	2	0.84229	6.751	2	1.0139	15.398	2										1.2864		1	0.84531
E9PQG7	ALL-1;C-terminal cleavage product of 180 kDa;CXXC-type zinc finger protein 7;Histone-lysine N-methyltransferase MLL;Lysine N-methyltransferase 2A;MLL cleavage product C180;MLL cleavage product N320;N-terminal cleavage product of 320 kDa;Trithorax-like protein;Zinc finger protein HRX	ALL1;CXXC7;HRX;HTRX;KMT2A;MLL;MLL1;TRX1	S3511	1.05955	11.45	1.0069	2.03	0.988635	3.17	0.983228	12.73									0.601397	SSAVQASPTSPGG	GO:0035097	GO:0003677;GO:0042800;GO:0008270	GO:0006355	0	n/a	1.0069	2.032	3	0.96692	7.6628	3	0.98186	3.166	3	0.95031	11.447	9	0.93446	10.139	9	0.97649	12.726	9
E9PQG7	ALL-1;C-terminal cleavage product of 180 kDa;CXXC-type zinc finger protein 7;Histone-lysine N-methyltransferase MLL;Lysine N-methyltransferase 2A;MLL cleavage product C180;MLL cleavage product N320;N-terminal cleavage product of 320 kDa;Trithorax-like protein;Zinc finger protein HRX	ALL1;CXXC7;HRX;HTRX;KMT2A;MLL;MLL1;TRX1	S3514	1.05112	4.64	1.1123		1.07837		0.982673	4.52	1.16195	12.29	1.2362	0.47	1.13525	16.1	1.17209	14.15	0.879338	VQASPTSPGGSPS	GO:0035097	GO:0003677;GO:0042800;GO:0008270	GO:0006355	0	0	1.1123		1	1.0504		1	0.9695		1	1.0582	4.6407	2	1.0085	14.596	2	0.88346	4.5165	2	1.2362	0.46653	2	1.0658	7.514
E9PQG7	ALL-1;C-terminal cleavage product of 180 kDa;CXXC-type zinc finger protein 7;Histone-lysine N-methyltransferase MLL;Lysine N-methyltransferase 2A;MLL cleavage product C180;MLL cleavage product N320;N-terminal cleavage product of 320 kDa;Trithorax-like protein;Zinc finger protein HRX	ALL1;CXXC7;HRX;HTRX;KMT2A;MLL;MLL1;TRX1	S3518	1.25001	10.25	1.1843	8.92	1.12743	61.89	1.13281	7.81	1.11112	13.1	1.0966	15.99	0.964668	0.55	0.959218	19.6	0.993881	PTSPGGSPSSPSS	GO:0035097	GO:0003677;GO:0042800;GO:0008270	GO:0006355	0	0	1.1843	8.9166	3	1.1341	12.895	3	0.95198	61.885	3	0.94743	10.253	12	0.9207	10.533	12	0.95652	7.8141	12	1.0966	15.985	2	0.96527	11.638
E9PQG7	ALL-1;C-terminal cleavage product of 180 kDa;CXXC-type zinc finger protein 7;Histone-lysine N-methyltransferase MLL;Lysine N-methyltransferase 2A;MLL cleavage product C180;MLL cleavage product N320;N-terminal cleavage product of 320 kDa;Trithorax-like protein;Zinc finger protein HRX	ALL1;CXXC7;HRX;HTRX;KMT2A;MLL;MLL1;TRX1	S3521									1.18857		1.1	6.37	1.08749	10.14	0.977933		0.721231	PGGSPSSPSSGQR	GO:0035097	GO:0003677;GO:0042800;GO:0008270	GO:0006355	n/a	0										1.0241		1	0.90962		1	0.85569		1	1.1	6.3721	3	1.0443	8.9494
E9PQG7	ALL-1;C-terminal cleavage product of 180 kDa;CXXC-type zinc finger protein 7;Histone-lysine N-methyltransferase MLL;Lysine N-methyltransferase 2A;MLL cleavage product C180;MLL cleavage product N320;N-terminal cleavage product of 320 kDa;Trithorax-like protein;Zinc finger protein HRX	ALL1;CXXC7;HRX;HTRX;KMT2A;MLL;MLL1;TRX1	S3530	0.971503	14.49	1.1114	79.57	1.49617	40.08	1.30589	31.23	1.20809	19.22	1.135	27.19	1.33158	12.26	1.29685	40.53	0.939009	SGQRSASPSVPGP	GO:0035097	GO:0003677;GO:0042800;GO:0008270	GO:0006355	0	0	1.1114	79.565	12	1.3021	117.44	12	1.3462	40.081	12	1.144	14.491	21	1.1945	18.173	21	1.175	31.23	21	1.135	27.185	23	1.2036	17.417
E9PQG7	ALL-1;C-terminal cleavage product of 180 kDa;CXXC-type zinc finger protein 7;Histone-lysine N-methyltransferase MLL;Lysine N-methyltransferase 2A;MLL cleavage product C180;MLL cleavage product N320;N-terminal cleavage product of 320 kDa;Trithorax-like protein;Zinc finger protein HRX	ALL1;CXXC7;HRX;HTRX;KMT2A;MLL;MLL1;TRX1	S516																	0.536368	HPPIPISQSPENE	GO:0035097	GO:0003677;GO:0042800;GO:0008270	GO:0006355	n/a	n/a
E9PQG7	ALL-1;C-terminal cleavage product of 180 kDa;CXXC-type zinc finger protein 7;Histone-lysine N-methyltransferase MLL;Lysine N-methyltransferase 2A;MLL cleavage product C180;MLL cleavage product N320;N-terminal cleavage product of 320 kDa;Trithorax-like protein;Zinc finger protein HRX	ALL1;CXXC7;HRX;HTRX;KMT2A;MLL;MLL1;TRX1	S518	0.996551	5.49	0.7253	11.03	0.774693	16.06	0.604907	15.43	0.897762	9.6	0.82823	2.94	0.695398	11.87	0.70619	10.79	0.494562	PIPISQSPENESN	GO:0035097	GO:0003677;GO:0042800;GO:0008270	GO:0006355	0	0	0.7253	11.028	9	0.80622	12.234	9	1.0681	16.062	9	0.72781	5.4904	5	0.68833	10.914	5	0.83401	15.426	5	0.82823	2.9412	3	0.68719	5.5342
E9PQG7	ALL-1;C-terminal cleavage product of 180 kDa;CXXC-type zinc finger protein 7;Histone-lysine N-methyltransferase MLL;Lysine N-methyltransferase 2A;MLL cleavage product C180;MLL cleavage product N320;N-terminal cleavage product of 320 kDa;Trithorax-like protein;Zinc finger protein HRX	ALL1;CXXC7;HRX;HTRX;KMT2A;MLL;MLL1;TRX1	T1848	0.981443	7.88	0.69019	3.58	0.504681	16.25	0.315251	19.71	1.18197	2.84	0.83018	7.02	0.648802	14.93	0.66734	4.18	0.998352	TPIHPPTPPIIST	GO:0035097	GO:0003677;GO:0042800;GO:0008270	GO:0006355	2	0	0.69019	3.5834	5	0.50039	16.585	5	0.73122	16.25	5	0.70324	7.8774	2	0.36463	8.1165	2	0.45676	19.705	2	0.83018	7.0164	6	0.60349	10.369
E9PQG7	ALL-1;C-terminal cleavage product of 180 kDa;CXXC-type zinc finger protein 7;Histone-lysine N-methyltransferase MLL;Lysine N-methyltransferase 2A;MLL cleavage product C180;MLL cleavage product N320;N-terminal cleavage product of 320 kDa;Trithorax-like protein;Zinc finger protein HRX	ALL1;CXXC7;HRX;HTRX;KMT2A;MLL;MLL1;TRX1	T2103	0.957459	28.19	1.1726	17.58	1.40184	17.03	1.35084	23.46	1.37973	23.24	1.3766	8.03	1.73465	18.69	1.34176	20.45	0.938786	TIAHSPTSFTESS	GO:0035097	GO:0003677;GO:0042800;GO:0008270	GO:0006355	0	0	1.1726	17.577	15	1.3093	26.652	15	1.1955	17.025	15	1.2247	28.19	9	1.3738	24.778	9	1.152	23.462	9	1.3766	8.0301	3	1.4595	24.512
E9PQG7	ALL-1;C-terminal cleavage product of 180 kDa;CXXC-type zinc finger protein 7;Histone-lysine N-methyltransferase MLL;Lysine N-methyltransferase 2A;MLL cleavage product C180;MLL cleavage product N320;N-terminal cleavage product of 320 kDa;Trithorax-like protein;Zinc finger protein HRX	ALL1;CXXC7;HRX;HTRX;KMT2A;MLL;MLL1;TRX1	T2172																	0.328804	PSAGSPTPTTHEI	GO:0035097	GO:0003677;GO:0042800;GO:0008270	GO:0006355	n/a	n/a
E9PQG7	ALL-1;C-terminal cleavage product of 180 kDa;CXXC-type zinc finger protein 7;Histone-lysine N-methyltransferase MLL;Lysine N-methyltransferase 2A;MLL cleavage product C180;MLL cleavage product N320;N-terminal cleavage product of 320 kDa;Trithorax-like protein;Zinc finger protein HRX	ALL1;CXXC7;HRX;HTRX;KMT2A;MLL;MLL1;TRX1	T2174																	0.328804	AGSPTPTTHEIVT	GO:0035097	GO:0003677;GO:0042800;GO:0008270	GO:0006355	n/a	n/a
E9PQG7	ALL-1;C-terminal cleavage product of 180 kDa;CXXC-type zinc finger protein 7;Histone-lysine N-methyltransferase MLL;Lysine N-methyltransferase 2A;MLL cleavage product C180;MLL cleavage product N320;N-terminal cleavage product of 320 kDa;Trithorax-like protein;Zinc finger protein HRX;MLL	ALL1;CXXC7;HRX;HTRX;KMT2A;MLL;MLL1;TRX1;MLL	T337	0.895493	51.215	0.89783	16.975	1.13014	25.555	1.0172	54.595	1.03536	22.22	0.94057	18.36	1.00641	42.66	0.917987	35.1	0.999912	RKDKEGTPPITKE	GO:0035097	GO:0003677;GO:0042800;GO:0008270	GO:0006355	0	0	1.0681	26.884	12	1.1492	18.016	12	1.2097	22.856	12	1.0349	20.63	11	1.333	32.317	11	1.1349	28.621	11	0.94057	18.362	17	0.97019	26.34
E9PQG7	ALL-1;C-terminal cleavage product of 180 kDa;CXXC-type zinc finger protein 7;Histone-lysine N-methyltransferase MLL;Lysine N-methyltransferase 2A;MLL cleavage product C180;MLL cleavage product N320;N-terminal cleavage product of 320 kDa;Trithorax-like protein;Zinc finger protein HRX	ALL1;CXXC7;HRX;HTRX;KMT2A;MLL;MLL1;TRX1	T3513	0.90026	10.47	0.97066		0.947733		0.97066	35.04	0.973624	21.55	1.1	6.37	1.08749	10.14	1.09751	20.91	0.774724	AVQASPTSPGGSP	GO:0035097	GO:0003677;GO:0042800;GO:0008270	GO:0006355	0	0	0.97066		1	0.96515		1	0.97638		1	1.0782	10.472	9	1.085	19.26	9	1	35.037	9	1.1	6.3721	3	1.0443	8.9494
E9PQG7	ALL-1;C-terminal cleavage product of 180 kDa;CXXC-type zinc finger protein 7;Histone-lysine N-methyltransferase MLL;Lysine N-methyltransferase 2A;MLL cleavage product C180;MLL cleavage product N320;N-terminal cleavage product of 320 kDa;Trithorax-like protein;Zinc finger protein HRX	ALL1;CXXC7;HRX;HTRX;KMT2A;MLL;MLL1;TRX1	T506	0.855563	17.6	0.53151	22.56	0.603742	25.48	0.495383	9.08	1.15761	23.53	0.6562		0.634007		0.585672	13.22	0.821289	PEERSDTPEVHPP	GO:0035097	GO:0003677;GO:0042800;GO:0008270	GO:0006355	2	0	0.53151	22.557	7	0.73431	14.475	7	1.1359	25.484	7	0.62124	17.595	6	0.64359	15.195	6	0.93203	9.0771	6	0.6562		1	0.65033
E9PRY8			Y354											1.0978		0.988635				0.499668	APSAIPYCYFIQK	GO:0005853	GO:0003746		n/a	n/a
E9PRY8			Y356											0.98008		1.00076				0.846275	SAIPYCYFIQKDA	GO:0005853	GO:0003746		n/a	n/a
F2Z2J9	BPG-dependent PGAM 1;Phosphoglycerate mutase 1;Phosphoglycerate mutase isozyme B	CDABP0006;PGAM1;PGAMA	S14	0.888012	13.64	1.04519	22.845	0.540076	38.335	1.04047	14.26	0.468738	13.675	0.83644	30.51	1.13622	23.79	0.534013	52.525	1	IIRHGESAWNIEN		GO:0016868	GO:0006096	0	3	0.99808	25.027	20	0.77872	29.87	20	0.75426	24.585	20	1.177	13.637	24	1.0965	13.794	24	0.99548	14.263	24	0.83644	30.511	26	1.1448	28.635
F2Z2X4	Exportin-4	KIAA1721;XPO4	S521	1.02519	24.03	1.0745	14.04	0.829503	45.02	0.878973	73.05	0.846089	28.99	0.99957	48.49	1.159	33.16	1.09513	14.13	0.999905	QQQIIASPGSSTV		GO:0005488		0	0	1.0745	14.037	15	0.81225	46.111	15	0.77199	45.016	15	1.0481	24.032	16	0.90855	56.308	17	0.81803	73.052	17	0.99957	48.489	6	1.2027	17.854
F2Z317	HIF-1;Histone-lysine N-methyltransferase SETD2;Huntingtin yeast partner B;Huntingtin-interacting protein 1;Huntingtin-interacting protein B;Lysine N-methyltransferase 3A;p231HBP;SET domain-containing protein 2;Putative uncharacterized protein SETD2	HIF1;HSPC069;HYPB;KIAA1732;KMT3A;SET2;SETD2;SETD2	S1098											1.4897		1.09679				0.916624	QSYRHYSDHWEDE	GO:0005694;GO:0005634	GO:0018024;GO:0016491;GO:0046914	GO:0006355	n/a	n/a										1.1343	17.401	7	1.0124	22.475	7	0.973	37.106	7	1.4897		1	1.1344
F2Z317	HIF-1;Histone-lysine N-methyltransferase SETD2;Huntingtin yeast partner B;Huntingtin-interacting protein 1;Huntingtin-interacting protein B;Lysine N-methyltransferase 3A;p231HBP;SET domain-containing protein 2	HIF1;HSPC069;HYPB;KIAA1732;KMT3A;SET2;SETD2	S1415	0.895685	10.07	1.0441	13.32	1.02421	13.74	0.83385	63.77	1.34352		1.1861	22.74	0.970337	21.03	1.362		1	QEIESDSESDGEI	GO:0005694;GO:0005634	GO:0018024;GO:0016491;GO:0046914	GO:0006355	0	0	1.0441	13.321	6	0.94747	18.288	6	0.98095	13.737	6	1.1657	10.066	9	0.90599	63.762	9	0.79863	63.767	9	1.1861	22.742	6	0.90654	13.441
F2Z317	HIF-1;Histone-lysine N-methyltransferase SETD2;Huntingtin yeast partner B;Huntingtin-interacting protein 1;Huntingtin-interacting protein B;Lysine N-methyltransferase 3A;p231HBP;SET domain-containing protein 2	HIF1;HSPC069;HYPB;KIAA1732;KMT3A;SET2;SETD2	S1417	0.947585	10.07	1.1046	14.67	0.916619	37.85	0.882167	63.77	1.34352		1.1861	22.74	0.970337	21.03	1.362		1	IESDSESDGEIQD	GO:0005694;GO:0005634	GO:0018024;GO:0016491;GO:0046914	GO:0006355	0	0	1.1046	14.665	12	0.79688	24.99	12	0.82982	37.851	12	1.1657	10.066	9	0.90599	63.762	9	0.79863	63.767	9	1.1861	22.742	6	0.90654	13.441
F2Z317	HIF-1;Histone-lysine N-methyltransferase SETD2;Huntingtin yeast partner B;Huntingtin-interacting protein 1;Huntingtin-interacting protein B;Lysine N-methyltransferase 3A;p231HBP;SET domain-containing protein 2	HIF1;HSPC069;HYPB;KIAA1732;KMT3A;SET2;SETD2	S2079	1.07057	55.6	1.0333	14.92	0.781226	20.26	0.777755	47.28	1.05321	20.66	1.024	5.27	1.01037	2.43	0.783698	11.14	0.504261	EKRKRRSSISPPS	GO:0005694;GO:0005634	GO:0018024;GO:0016491;GO:0046914	GO:0006355	0	0	1.0333	14.921	2	0.84154	14.664	2	0.75605	20.263	2	0.96519	55.599	3	1.2182	9.4983	3	0.75269	47.284	3	1.024	5.2746	3	1.0468	6.0267
F2Z317	HIF-1;Histone-lysine N-methyltransferase SETD2;Huntingtin yeast partner B;Huntingtin-interacting protein 1;Huntingtin-interacting protein B;Lysine N-methyltransferase 3A;p231HBP;SET domain-containing protein 2	HIF1;HSPC069;HYPB;KIAA1732;KMT3A;SET2;SETD2	S2080	1.00989	19.71	1.2458	17.22	1.19704	10.83	1.13185	9.83	1.09568	20.66	1.0653	20.39	0.959654	14.13	0.815306	11.14	0.999244	KRKRRSSISPPSS	GO:0005694;GO:0005634	GO:0018024;GO:0016491;GO:0046914	GO:0006355	0	0	1.2458	17.219	10	1.1342	18.284	10	0.96086	10.827	10	1.2336	19.707	3	1.0319	3.5337	3	0.90853	9.8307	3	1.0653	20.392	12	1.0078	18.979
F2Z317	HIF-1;Histone-lysine N-methyltransferase SETD2;Huntingtin yeast partner B;Huntingtin-interacting protein 1;Huntingtin-interacting protein B;Lysine N-methyltransferase 3A;p231HBP;SET domain-containing protein 2	HIF1;HSPC069;HYPB;KIAA1732;KMT3A;SET2;SETD2	S2082	1.07258	37.39	1.1704	17.78	1.04891	14.94	1.01674	32.04	1.10422	20.66	1.0736	20.29	0.962343	14	0.821658	11.14	0.983483	KRRSSISPPSSAY	GO:0005694;GO:0005634	GO:0018024;GO:0016491;GO:0046914	GO:0006355	0	0	1.1704	17.784	10	1.0587	23.018	10	0.8962	14.938	10	1.0912	37.392	6	1.059	9.0889	6	0.86871	32.037	6	1.0736	20.29	19	1.0451	19.299
F2Z317	HIF-1;Histone-lysine N-methyltransferase SETD2;Huntingtin yeast partner B;Huntingtin-interacting protein 1;Huntingtin-interacting protein B;Lysine N-methyltransferase 3A;p231HBP;SET domain-containing protein 2;Putative uncharacterized protein SETD2	HIF1;HSPC069;HYPB;KIAA1732;KMT3A;SET2;SETD2;SETD2	S321									1.12396	9.61	1.0295	21.53	1.09765	17.23	0.887542	10.69	0.99997	EGIFIGSESDEDS	GO:0005694;GO:0005634	GO:0018024;GO:0016491;GO:0046914	GO:0006355	n/a	0										1.2788	16.467	7	0.95588	13.474	7	0.77398	24.609	7	1.0295	21.528	3	1.1358	17.699
F2Z317	HIF-1;Histone-lysine N-methyltransferase SETD2;Huntingtin yeast partner B;Huntingtin-interacting protein 1;Huntingtin-interacting protein B;Lysine N-methyltransferase 3A;p231HBP;SET domain-containing protein 2;Putative uncharacterized protein SETD2	HIF1;HSPC069;HYPB;KIAA1732;KMT3A;SET2;SETD2;SETD2	S323									1.12396	9.61	1.0295	21.53	1.09765	17.23	0.887542	10.69	0.999509	IFIGSESDEDSVR	GO:0005694;GO:0005634	GO:0018024;GO:0016491;GO:0046914	GO:0006355	n/a	0										1.2788	16.467	7	0.95588	13.474	7	0.77398	24.609	7	1.0295	21.528	3	1.1358	17.699
F2Z317	HIF-1;Histone-lysine N-methyltransferase SETD2;Huntingtin yeast partner B;Huntingtin-interacting protein 1;Huntingtin-interacting protein B;Lysine N-methyltransferase 3A;p231HBP;SET domain-containing protein 2;Putative uncharacterized protein SETD2	HIF1;HSPC069;HYPB;KIAA1732;KMT3A;SET2;SETD2;SETD2	S754	1.07895	30.44	1.0043	19.97	1.09258	21.35	1.12391	22.76	1.15866	21.01	1.2305	22.69	1.3127	16.08	1.23358	15.65	0.999994	ETEPIVSPHQDKI	GO:0005694;GO:0005634	GO:0018024;GO:0016491;GO:0046914	GO:0006355	0	0	1.0043	19.971	9	1.2505	20.2	9	1.0879	21.35	9	0.93081	30.435	25	1.1164	27.319	25	1.1191	22.755	25	1.2305	22.694	32	1.1736	16.954
F2Z317	HIF-1;Histone-lysine N-methyltransferase SETD2;Huntingtin yeast partner B;Huntingtin-interacting protein 1;Huntingtin-interacting protein B;Lysine N-methyltransferase 3A;p231HBP;SET domain-containing protein 2;Putative uncharacterized protein SETD2	HIF1;HSPC069;HYPB;KIAA1732;KMT3A;SET2;SETD2;SETD2	T749											1.19		1.23225				0.836942	ESPFRETEPIVSP	GO:0005694;GO:0005634	GO:0018024;GO:0016491;GO:0046914	GO:0006355	n/a	n/a										1.1572		1	1.0058		1	1.1777		1	1.19		1	1.1094
F5GWR8	DSH homolog 3;Segment polarity protein dishevelled homolog DVL-3;cDNA FLJ61571, highly similar to Segment polarity protein dishevelled homolog DVL-3;Putative uncharacterized protein DVL3	DVL3;KIAA0208;DVL3	S116																	0.354533	GDSRPPSFHPHAG	GO:0005622	GO:0004871	GO:0035556;GO:0007275	n/a	n/a
F5GWR8	DSH homolog 3;Segment polarity protein dishevelled homolog DVL-3;cDNA FLJ61571, highly similar to Segment polarity protein dishevelled homolog DVL-3;Putative uncharacterized protein DVL3	DVL3;KIAA0208;DVL3	S125	1.07359	13.46	1.0674		0.750083		0.859951	15.78			0.92483	13	0.804824	10.06			0.913385	PHAGGGSQENIDN	GO:0005622	GO:0004871	GO:0035556;GO:0007275	0	n/a	1.0674		1	0.7492		1	0.70272		1	0.99423	13.456	8	0.88531	39.645	8	0.80565	15.782	8	0.92483	12.995	6	0.81019	27.597
F5GX74	Activating transcription factor 7-interacting protein 1;ATFa-associated modulator;ATF-interacting protein;MBD1-containing chromatin-associated factor 1;P621;Putative uncharacterized protein ATF7IP	ATF7IP;MCAF;MCAF1;ATF7IP	S121	1.02009	15.82	1.0918	13.8	1.14322	14.38	1.23526	16.98	0.791394	7.82	0.9932	13.22	1.24041	13.06	1.17227	19.37	0.999496	INCEPISPHNITP				0	0	1.0918	13.801	22	1.1183	15.132	22	1.0471	14.381	22	1.0703	15.819	33	1.1151	14.002	33	1.1314	16.976	33	0.9932	13.223	34	1.158	11.116
F5GX74	Activating transcription factor 7-interacting protein 1;ATFa-associated modulator;ATF-interacting protein;MBD1-containing chromatin-associated factor 1;P621;Putative uncharacterized protein ATF7IP	ATF7IP;MCAF;MCAF1;ATF7IP	S482																	0.402994	EEKMESSFGSPSK				n/a	n/a
F5GX74	Activating transcription factor 7-interacting protein 1;ATFa-associated modulator;ATF-interacting protein;MBD1-containing chromatin-associated factor 1;P621;Putative uncharacterized protein ATF7IP	ATF7IP;MCAF;MCAF1;ATF7IP	S485	0.62393		1.02805	30.98	1.10839	21.79	1.50609		0.764509	14.75	0.98205	24.26	1.18641	16.87	1.10785	15	0.970279	MESSFGSPSKQES				0	0	1.0533	30.981	6	1.1575	38.344	6	1.1647	21.791	6										1.3367	24.256	7	1.4473	9.7883
F5GX74	Activating transcription factor 7-interacting protein 1;ATFa-associated modulator;ATF-interacting protein;MBD1-containing chromatin-associated factor 1;P621	ATF7IP;MCAF;MCAF1	S567									0.81554	26.01	0.74449	103.72	0.757295	18.84	0.673868	12.54	0.999454	RRKRSKSEDMDNV				n/a	0																			0.74449	103.72	5	1.0528	19.399
F5GX74	Activating transcription factor 7-interacting protein 1;ATFa-associated modulator;ATF-interacting protein;MBD1-containing chromatin-associated factor 1;P621	ATF7IP;MCAF;MCAF1	S681	0.995449	13.91	0.96894	11.26	1.21486	18.68	1.30691	15.4	1.09407	7.72	0.9965	10.92	1.34418	11.36	0.791052	22.08	1	PPNPPVSPGKTVN				0	0	0.96894	11.261	18	1.1291	9.0782	18	1.2538	18.683	18	0.97337	13.911	22	1.1389	14.7	22	1.3488	15.401	22	0.9965	10.92	12	1.17	9.9364
F5GXF7	LIM domain protein ZNF185;P1-A;Zinc finger protein 185;Zinc finger protein 185 variant 630;cDNA FLJ52900, moderately similar to Zinc finger protein 185	ZNF185;ZNF185	S497			1.4346	18.29	1.02024	15.62											0.908877	QIVRRESCGSSVI		GO:0008270		n/a	n/a	1.4346	18.286	4	1.2144	15.377	4	0.71117	15.618	4
F5GY24	Lipin-1;Phosphatidate phosphatase LPIN1;Putative uncharacterized protein LPIN1	KIAA0188;LPIN1;LPIN1	S211	0.676388		1.3939		1.38996		1.61665										0.786236	RKRRRKSQIDSIK				0	n/a	1.3939		1	0.77424		1	0.99717		1	2.0608		1	1.8493		1	1.1598		1
F5GZI1			S9	1.75167		1.0578		0.866782		1.18939		1.2528	6.04	1.0127	31.63	0.78461	9.34	1.28086	6.14	1	EIFDDASPGKQKE		GO:0005524;GO:0003677;GO:0004386;GO:0031491	GO:0043044	0	0
F5H039	Domain E;Domain G;Gephyrin;Molybdopterin adenylyltransferase;Molybdopterin molybdenumtransferase	GPH;GPHN;KIAA1385	S201	1.03334	16.42	0.55105	24.12	0.468404	15.46	0.4994	63.16	0.503846		0.56335	9.82	0.505319	8.55	0.414434		0.999906	EIEDIPSPPPPIS			GO:0006777	2	7	0.55105	24.119	6	0.5206	31.085	6	0.85002	15.456	6	0.53327	16.423	5	0.59355	37.475	5	0.90627	63.16	5	0.56335	9.8199	5	0.48286	8.1982
F5H039	Domain E;Domain G;Gephyrin;Molybdopterin adenylyltransferase;Molybdopterin molybdenumtransferase	GPH;GPHN;KIAA1385	S207	1.05294	16.42	0.5615	26.43	0.499246	16.48	0.508871	63.16	0.503846		0.56335	9.82	0.505319	8.55	0.414434		0.998274	SPPPPISPPPTTS			GO:0006777	2	7	0.5615	26.426	5	0.54343	17.43	5	0.88913	16.479	5	0.53327	16.423	5	0.59355	37.475	5	0.90627	63.16	5	0.56335	9.8199	5	0.48286	8.1982
F5H039	Domain E;Domain G;Gephyrin;Molybdopterin adenylyltransferase;Molybdopterin molybdenumtransferase	GPH;GPHN;KIAA1385	S213																	0.460586	SPPPTTSPHKQTE			GO:0006777	n/a	n/a
F5H0B0	Prostate leucine zipper variant 1;Putative uncharacterized protein TPD52;Prostate leucine zipper isoform 3;Protein N8;Tumor protein D52;Putative uncharacterized protein TPD52	PrLZ;TPD52;PrLZ;TPD52;TPD52	S176	0.891369	13.26	1.25585	36	0.686994	24.65	1.18833	20.845	0.689851	18.095	1.08855	14.325	0.89327	17.285	0.709849	20	1	NSPTFKSFEEKVE				0	0	1.0749	36.002	83	0.87949	27.081	83	0.88	24.654	83	1.7036	20.207	7	1.2776	18.774	7	0.91128	28.303	7	1.1254	20.976	36	1.0357	18.967
F5H0X3	Cutaneous T-cell lymphoma-associated antigen se14-3;Protein kinase C-binding protein 1;Rack7;Zinc finger MYND domain-containing protein 8;RACK7 isoform j;RACK7 isoform l;ZMYND8 protein;Protein kinase C binding protein 1;Protein kinase C binding protein 1;Protein kinase C binding protein 1	KIAA1125;PRKCBP1;RACK7;ZMYND8;ZMYND8;PRKCBP1;RP4-569M23.1-003;PRKCBP1;RP4-569M23.1-006;PRKCBP1;RP4-569M23.1-009	S39			0.96413	2.86	1.08108	7.33			1.25997	31.81	1.0856	14.32	1.34669	29.55	1.65771	6.06	0.999993	RSKDPGSAERTAQ		GO:0008270		n/a	0	0.96413	2.8632	2	1.2944	18.007	2	1.1213	7.3307	2										1.0856	14.316	4	1.1924	11.862
F5H0X3	Cutaneous T-cell lymphoma-associated antigen se14-3;Protein kinase C-binding protein 1;Rack7;Zinc finger MYND domain-containing protein 8;RACK7 isoform j;RACK7 isoform l;ZMYND8 protein	KIAA1125;PRKCBP1;RACK7;ZMYND8;ZMYND8	S433	1.0999	18.47	1.13454	13.3	1.05179	22.91	1.24709	13.28	0.92127	31.33	0.993295	15.36	0.801604	14.08	1.00871	30.78	0.999062	NFDMTASPKIIMS		GO:0008270		0	0	1.2836	8.1419	2	1.1396	20.91	2	0.8577	31.406	2										1.0669		1	1.1879
F5H0X3	Cutaneous T-cell lymphoma-associated antigen se14-3;Protein kinase C-binding protein 1;Rack7;Zinc finger MYND domain-containing protein 8;RACK7 isoform j;RACK7 isoform l;ZMYND8 protein	KIAA1125;PRKCBP1;RACK7;ZMYND8;ZMYND8	S452	1.02359	11.625	1.293	23.73	1.33217	33.03	1.20167	14.65	1.0139	23.06	0.68394	12.56	0.498616	12.25	0.525581	20.545	0.999992	GTGRRISISDMPR		GO:0008270		0	2	1.2304	38.19	46	1.3383	44.874	46	1.1107	52.436	46	1.3058	16.493	36	1.1886	13.641	36	0.91299	23.051	36	0.68929	19.482	12	0.56196	15.496
F5H0X3	Cutaneous T-cell lymphoma-associated antigen se14-3;Protein kinase C-binding protein 1;Rack7;Zinc finger MYND domain-containing protein 8;RACK7 isoform j;RACK7 isoform l;ZMYND8 protein	KIAA1125;PRKCBP1;RACK7;ZMYND8;ZMYND8	S459	1.0349	30.98	1.0243	24.32	0.898639	48.92	0.968148	30.82	1.217	35.21	1.1113	10.46	1.25477	14.91	1.34078	9.67	0.991455	ISDMPRSPMSTNS		GO:0008270		0	0	1.0243	24.323	12	1.0043	50.276	12	0.87732	48.916	12	0.98976	30.976	8	1.054	34.796	8	0.94518	30.823	8	1.1113	10.463	5	1.0595	12.163
F5H0X3	Cutaneous T-cell lymphoma-associated antigen se14-3;Protein kinase C-binding protein 1;Rack7;Zinc finger MYND domain-containing protein 8;RACK7 isoform j;RACK7 isoform l;ZMYND8 protein	KIAA1125;PRKCBP1;RACK7;ZMYND8;ZMYND8	S471	1.03246	27.9	0.9306	22.07	0.863522	52.71	0.916967	26.69	1.00591	17.36	0.96568	31.92	0.84245	22.95	1.05249	29.02	0.92262	SSVHTGSDVEQDA		GO:0008270		0	0	0.9306	22.066	18	0.89605	63.477	18	0.92792	52.711	18	0.90134	27.899	16	0.92327	28.461	16	0.98535	26.687	15	0.96568	31.923	13	0.98356	22.712
F5H0X3	Cutaneous T-cell lymphoma-associated antigen se14-3;Protein kinase C-binding protein 1;Rack7;Zinc finger MYND domain-containing protein 8;RACK7 isoform j;RACK7 isoform l;ZMYND8 protein	KIAA1125;PRKCBP1;RACK7;ZMYND8;ZMYND8	S487	1.25176	15.28	2.4925	7.65	3.15127	4.64	1.63633	22.85	2.51295	37.75	2.5082	47.27	3.44727	22.11	2.61605	22.92	0.999415	ATSSHFSASEESM		GO:0008270		4	4	2.4925	7.6515	5	2.8759	12.69	5	1.2643	4.6411	5	1.9912	15.275	6	1.4063	31.72	6	0.6565	22.845	6	2.5082	47.266	4	3.1762	33.591
F5H0X3	Cutaneous T-cell lymphoma-associated antigen se14-3;Protein kinase C-binding protein 1;Rack7;Zinc finger MYND domain-containing protein 8;RACK7 isoform j;RACK7 isoform l;ZMYND8 protein	KIAA1125;PRKCBP1;RACK7;ZMYND8;ZMYND8	S489	1.18672	7.09	2.1374		2.29087		1.69103	11.29	2.49702	37.75	2.4923		3.61658		2.59947	22.92	0.999962	SSHFSASEESMDF		GO:0008270		4	4	2.1374		1	2.5581		1	1.0718		1	1.8011	7.0944	3	1.4748	7.8971	3	0.79116	11.289	3	2.4923		1	2.9822
F5H0X3	Cutaneous T-cell lymphoma-associated antigen se14-3;Protein kinase C-binding protein 1;Rack7;Zinc finger MYND domain-containing protein 8;RACK7 isoform j;RACK7 isoform l;ZMYND8 protein	KIAA1125;PRKCBP1;RACK7;ZMYND8;ZMYND8	S492	1.32411	24.02	2.2261	33.86	1.91198	36.27	0.884274	15.16	1.71702	37.55	1.7208	30.19	2.18232	25.34	1.15758	6.44	0.999992	FSASEESMDFIDK		GO:0008270		3	4	2.2261	33.859	33	1.7406	23.149	34	0.85889	36.272	34	1.6812	24.021	7	0.71633	32.902	7	0.39723	15.157	7	1.7208	30.193	3	2.2358	14.573
F5H0X3	Cutaneous T-cell lymphoma-associated antigen se14-3;Protein kinase C-binding protein 1;Rack7;Zinc finger MYND domain-containing protein 8;RACK7 isoform j;RACK7 isoform l;ZMYND8 protein;Protein kinase C binding protein 1	KIAA1125;PRKCBP1;RACK7;ZMYND8;ZMYND8;PRKCBP1;RP4-569M23.1-003	S51	1.09524	16.21	1.0468	8.45	1.34231	9.19	1.24726	21.41	0.946076	5.48	0.87161	11.04	1.25494	10.63	1.06023	26.01	0.994566	QKRKFPSPPHSSN		GO:0008270		0	0	1.0468	8.4456	8	1.254	15.195	8	1.2823	9.1892	8	0.95577	16.213	15	1.1543	16.467	15	1.1915	21.408	15	0.87161	11.041	7	1.1364	5.9307
F5H0X3	Cutaneous T-cell lymphoma-associated antigen se14-3;Protein kinase C-binding protein 1;Rack7;Zinc finger MYND domain-containing protein 8;RACK7 isoform j;ZMYND8 protein	KIAA1125;PRKCBP1;RACK7;ZMYND8;ZMYND8	S513	0.881896	7.09	0.99469	17.3	1.46528	12.94	1.63547	9.4	1.14161	22.68	1.1286	30.09	1.67631	11.78	1.53207	13.85	0.947659	KTGQAGSISGSPK		GO:0008270		0	0	0.99469	17.304	15	1.5033	23.544	15	1.4731	12.944	15	1.1279	7.0878	16	1.6352	28.414	16	1.6442	9.3983	16	1.1286	30.088	8	1.4789	10.827
F5H0X3	Cutaneous T-cell lymphoma-associated antigen se14-3;Protein kinase C-binding protein 1;Rack7;Zinc finger MYND domain-containing protein 8;RACK7 isoform j;ZMYND8 protein	KIAA1125;PRKCBP1;RACK7;ZMYND8;ZMYND8	S517	0.976487	7.44	0.99963	29.55	1.40068	36.35	1.38269	14.67	1.07728	5.97	1.0193	8.54	1.30338	10.98	1.31286	6.99	0.845214	AGSISGSPKPFSP		GO:0008270		0	0	0.99963	29.55	26	1.2785	20.365	26	1.4012	36.35	26	1.0237	7.4355	14	1.2782	13.704	14	1.3832	14.665	14	1.0193	8.5359	13	1.1798	11.051
F5H0X3	Cutaneous T-cell lymphoma-associated antigen se14-3;Protein kinase C-binding protein 1;Rack7;Zinc finger MYND domain-containing protein 8;RACK7 isoform j;ZMYND8 protein	KIAA1125;PRKCBP1;RACK7;ZMYND8;ZMYND8	S522	1.02104	6.15	0.99649	18.35	1.27232	11.39	1.34287	21.48	1.10768	5.08	0.99393	7.3	1.3914	8.26	1.46376	9.75	0.997478	GSPKPFSPQISAP		GO:0008270		0	0	0.99649	18.349	4	1.1314	25.422	4	1.2768	11.387	4	0.97596	6.1548	8	1.2668	10.286	8	1.3476	21.476	8	0.99393	7.295	4	1.2521	11.788
F5H0X3	Cutaneous T-cell lymphoma-associated antigen se14-3;Protein kinase C-binding protein 1;Rack7;Zinc finger MYND domain-containing protein 8;RACK7 isoform j;RACK7 isoform l;ZMYND8 protein	KIAA1125;PRKCBP1;RACK7;ZMYND8;ZMYND8	S574	0.982802	16.22	1.0172	14.22	1.03053	41.94	0.811899	30.21	1.02345	16.405	0.920975	13.97	0.817761	17.7	0.853279	24.22	1	TPVPIISPKRQIR		GO:0008270		0	0																			0.83455		1	0.84679
F5H0X3	Cutaneous T-cell lymphoma-associated antigen se14-3;Protein kinase C-binding protein 1;Rack7;Zinc finger MYND domain-containing protein 8;RACK7 isoform j;RACK7 isoform l;ZMYND8 protein;Protein kinase C binding protein 1	KIAA1125;PRKCBP1;RACK7;ZMYND8;ZMYND8;PRKCBP1;RP4-569M23.1-003	S60	1.00637	3.39	0.9429		1.22784		1.13176	21.92	0.880565	11.22	0.70093	23.25	1.0863	14.88	0.879667	19.71	0.473968	HSSNGHSPQDTST		GO:0008270		0	0	0.9429		1	1.1019		1	1.3022		1	0.93693	3.3931	2	1.0227	10.127	2	1.2003	21.919	2	0.70093	23.253	6	1.0385	10.302
F5H0X3	Cutaneous T-cell lymphoma-associated antigen se14-3;Protein kinase C-binding protein 1;Rack7;Zinc finger MYND domain-containing protein 8;RACK7 isoform j;RACK7 isoform l;ZMYND8 protein	KIAA1125;PRKCBP1;RACK7;ZMYND8;ZMYND8	S679			0.99201		1.47611												0.613705	EEIKSTSPASEKA		GO:0008270		n/a	n/a	0.99201		1	1.2906		1	1.488		1
F5H0X3	Cutaneous T-cell lymphoma-associated antigen se14-3;Protein kinase C-binding protein 1;Rack7;Zinc finger MYND domain-containing protein 8;RACK7 isoform j;RACK7 isoform l;ZMYND8 protein	KIAA1125;PRKCBP1;RACK7;ZMYND8;ZMYND8	S682	0.823467	24.37	0.80302	30.34	0.93865	40.79	0.830082	22.72	1.21785	37.65	1.0556	17.99	1.32224	15.4	1.15324	14.12	0.999997	KSTSPASEKADPG		GO:0008270		0	0	0.80302	30.338	5	1.0018	46.465	5	1.1689	40.791	5	0.97517	24.37	15	1.1841	11.124	15	1.0337	22.715	15	1.0556	17.987	4	1.1105	28.022
F5H0X3	Cutaneous T-cell lymphoma-associated antigen se14-3;Protein kinase C-binding protein 1;Rack7;Zinc finger MYND domain-containing protein 8;RACK7 isoform j;RACK7 isoform l;ZMYND8 protein	KIAA1125;PRKCBP1;RACK7;ZMYND8;ZMYND8	S695	0.788122		1.0457	85.27	1.13981	28.02	1.06564		1.15387	25.21	1.1396	72.22	1.35533	16	1.5604	17.86	1	AVKDKASPEPEKD		GO:0008270		0	0	1.0457	85.273	11	1.0925	110.37	11	1.09	28.018	11	1.7888		1	0.83491		1	0.87144		1	1.1396	72.216	38	1.1783	58.668
F5H0X3	Cutaneous T-cell lymphoma-associated antigen se14-3;Protein kinase C-binding protein 1;Rack7;Zinc finger MYND domain-containing protein 8;RACK7 isoform j;RACK7 isoform l;ZMYND8 protein	KIAA1125;PRKCBP1;RACK7;ZMYND8;ZMYND8	S709	0.843735	31.36	0.87335	17.18	1.03841	36.72	0.996405	28.28	0.77408	18.09	0.64895	23.54	0.480496	13.86	0.684837	6.04	1	SEKAKPSPHPIKD		GO:0008270		0	1	0.87335	17.183	9	1.0325	16.7	9	1.189	36.722	9	1.0351	31.356	8	1.2514	8.6954	8	1.1409	28.281	8	0.64895	23.535	3	0.92717	8.6922
F5H0X3	Cutaneous T-cell lymphoma-associated antigen se14-3;Protein kinase C-binding protein 1;Rack7;Zinc finger MYND domain-containing protein 8;RACK7 isoform j;RACK7 isoform l;ZMYND8 protein	KIAA1125;PRKCBP1;RACK7;ZMYND8;ZMYND8	S734	0.961664	43.18	0.93142	33.57	0.802297	84.03	0.956475	75.54	1.08174	51.74	0.88987	56.62	0.930448	39.77	0.882119	57.72	0.870052	VHIGIDSDSESEI		GO:0008270		0	0	0.93142	33.569	24	0.90959	52.519	25	0.86137	84.026	25	0.96855	43.179	115	0.94544	33.166	115	1.0269	75.535	114	0.88987	56.615	91	0.89762	38.934
F5H0X3	Cutaneous T-cell lymphoma-associated antigen se14-3;Protein kinase C-binding protein 1;Rack7;Zinc finger MYND domain-containing protein 8;RACK7 isoform j;RACK7 isoform l;ZMYND8 protein	KIAA1125;PRKCBP1;RACK7;ZMYND8;ZMYND8	S736	1.00916	46.7	0.94065	33.83	0.866959	77.63	0.976113	77.14	1.09835	51.31	0.88987	53.93	0.930448	38.59	0.880153	59.03	0.859385	IGIDSDSESEIVI		GO:0008270		0	0	0.94065	33.828	27	0.90124	52.573	28	0.92166	77.633	28	0.93211	46.698	153	0.97467	39.953	153	1.0377	77.144	152	0.88987	53.926	91	0.88578	38.18
F5H0X3	Cutaneous T-cell lymphoma-associated antigen se14-3;Protein kinase C-binding protein 1;Rack7;Zinc finger MYND domain-containing protein 8;RACK7 isoform j;RACK7 isoform l;ZMYND8 protein	KIAA1125;PRKCBP1;RACK7;ZMYND8;ZMYND8	S738	1.0479	38.7	1.0008	35.22	1.08657	10.87	1.04093	49.94	1.31383	25.78	0.93801	24.41	1.01042	17.37	0.774749	24.2	0.594574	IDSDSESEIVIDI		GO:0008270		0	0	1.0008	35.221	6	1.0003	36.784	6	1.0857	10.87	6	0.95505	38.701	43	0.9712	18.205	43	1.0401	49.936	43	0.93801	24.407	22	0.89105	36.97
F5H0X3	Cutaneous T-cell lymphoma-associated antigen se14-3;Protein kinase C-binding protein 1;Rack7;Zinc finger MYND domain-containing protein 8;RACK7 isoform j;RACK7 isoform l	KIAA1125;PRKCBP1;RACK7;ZMYND8	S783	0.971901	29.08	0.83358	9.13	0.813816	22.46	0.823535	6.78	1.18276	12.19	0.90094	12.66	0.881642	14.07	0.965087	8.11	0.941111	TTVGSHSPPETPV		GO:0008270		0	0	0.83358	9.1287	18	0.77271	18.213	18	0.97629	22.458	18	0.85768	29.083	6	0.79404	9.8221	6	0.98795	6.7827	6	0.90094	12.66	12	0.8362	13.129
F5H0X3	Cutaneous T-cell lymphoma-associated antigen se14-3;Protein kinase C-binding protein 1;Rack7;Zinc finger MYND domain-containing protein 8;RACK7 isoform j;RACK7 isoform l;ZMYND8 protein;Protein kinase C binding protein 1	KIAA1125;PRKCBP1;RACK7;ZMYND8;ZMYND8;PRKCBP1;RP4-569M23.1-003	T64	1.20971		1.1544		1.3518		1.66568		1.06133	7.02	0.99834	7.84	1.33209	5.03	1.20859	0.97	0.318854	GHSPQDTSTSPIK		GO:0008270		0	0	1.1544		1	1.065		1	1.171		1	0.95428		1	1.2291		1	1.4429		1	0.99834	7.835	3	1.1853	2.3726
F5H0X3	Cutaneous T-cell lymphoma-associated antigen se14-3;Protein kinase C-binding protein 1;Rack7;Zinc finger MYND domain-containing protein 8;RACK7 isoform j;RACK7 isoform l	KIAA1125;PRKCBP1;RACK7;ZMYND8	T773	1.02014	15.88	0.90722	14.51	0.921373	21.77	0.98007	12.72	2.24075	57.1	0.91425	14.85	0.961425	14.26	1.12562	7.36	0.993698	QDVVGKTPPSTTV		GO:0008270		0	8	0.90722	14.513	9	1.0087	19.847	9	1.0156	21.766	9	0.88931	15.884	17	0.91967	23.69	17	1.0803	12.724	17	0.91425	14.848	10	0.93872	17.189
F5H0X5	SMARCA4 isoform 2;SMARCA4 isoform 4;SMARCA4 isoform 1;SWI/SNF related, matrix associated, actin dependent regulator of chromatin, subfamily a, member 4, isoform CRA_f;SMARCA4 isoform 3;SMARCA4 isoform 2;SWI/SNF related, matrix associated, actin dependent regulator of chromatin, subfamily a, member 4, isoform CRA_c;ATP-dependent helicase SMARCA4;BRG1-associated factor 190A;Mitotic growth and trans…	hCG_29955;SMARCA4;hCG_29955;SMARCA4;BAF190A;BRG1;SMARCA4;SNF2B;SNF2L4	S1451	0.826651	15	1.2804	28.18	0.951568	59.57	1.16665	44.8			0.86308	43.62	0.157685	27.51			0.994602	RKRKRDSDAGSST	GO:0005634	GO:0005524;GO:0003677;GO:0004386	GO:0006355	0	n/a	1.2804	28.177	11	1.3635	25.605	11	0.74318	59.574	11	1.5489	14.999	7	1.316	23.242	7	0.91116	44.795	7	0.86308	43.617	2	0.89954	29.838
F5H0X5	SMARCA4 isoform 2;SMARCA4 isoform 4;SMARCA4 isoform 1;SWI/SNF related, matrix associated, actin dependent regulator of chromatin, subfamily a, member 4, isoform CRA_f;SMARCA4 isoform 3;SMARCA4 isoform 2;SWI/SNF related, matrix associated, actin dependent regulator of chromatin, subfamily a, member 4, isoform CRA_c;ATP-dependent helicase SMARCA4;BRG1-associated factor 190A;Mitotic growth and trans…	hCG_29955;SMARCA4;hCG_29955;SMARCA4;BAF190A;BRG1;SMARCA4;SNF2B;SNF2L4	S1456											1.0948	107.18	1.42182	111.86			0.989433	DSDAGSSTPTTST	GO:0005634	GO:0005524;GO:0003677;GO:0004386	GO:0006355	n/a	n/a																			1.0948	107.18	3	1.0945	16.578
F5H0X5	SMARCA4 isoform 2;SMARCA4 isoform 4;SMARCA4 isoform 1;SWI/SNF related, matrix associated, actin dependent regulator of chromatin, subfamily a, member 4, isoform CRA_f;SMARCA4 isoform 3;SMARCA4 isoform 2;SWI/SNF related, matrix associated, actin dependent regulator of chromatin, subfamily a, member 4, isoform CRA_c;ATP-dependent helicase SMARCA4;BRG1-associated factor 190A;Mitotic growth and trans…	hCG_29955;SMARCA4;hCG_29955;SMARCA4;BAF190A;BRG1;SMARCA4;SNF2B;SNF2L4	S1486	1.01348	17.89	0.767485	74.08	0.742146	20.17	0.866798	28.14	1.07499	15.23	0.91333	22.34	1.03042	28.13	1.17765	17.73	0.999997	PPAEKISPNPPNI	GO:0005634	GO:0005524;GO:0003677;GO:0004386	GO:0006355	0	0	0.80951	74.08	20	0.91906	86.874	20	1.3665	20.171	20	0.75728	17.889	44	0.85002	16.228	44	1.1294	28.139	44	0.91333	22.337	36	0.92969	14.229
F5H0X5	SMARCA4 isoform 2;SMARCA4 isoform 4;SMARCA4 isoform 1;SWI/SNF related, matrix associated, actin dependent regulator of chromatin, subfamily a, member 4, isoform CRA_f;SMARCA4 isoform 3;SMARCA4 isoform 2;SWI/SNF related, matrix associated, actin dependent regulator of chromatin, subfamily a, member 4, isoform CRA_c;ATP-dependent helicase SMARCA4;BRG1-associated factor 190A;Mitotic growth and trans…	hCG_29955;SMARCA4;hCG_29955;SMARCA4;BAF190A;BRG1;SMARCA4;SNF2B;SNF2L4	S1604	1.13469		0.92088	28.28	0.799324	34.13	3.31692		2.03265	63.74	1.1529	59.05	0.993293	34.66	0.971941	41.57	0.999974	IEKEDDSEGEESE	GO:0005634	GO:0005524;GO:0003677;GO:0004386	GO:0006355	4	8	0.92088	28.283	5	0.84471	17.237	5	0.868	34.131	5	0.81157		1	1.0395		1	3.6019		1	1.1529	59.046	10	1.0534	27.506
F5H0X5	SMARCA4 isoform 2;SMARCA4 isoform 4;SMARCA4 isoform 1;SWI/SNF related, matrix associated, actin dependent regulator of chromatin, subfamily a, member 4, isoform CRA_f;SMARCA4 isoform 3;SMARCA4 isoform 2;SWI/SNF related, matrix associated, actin dependent regulator of chromatin, subfamily a, member 4, isoform CRA_c;ATP-dependent helicase SMARCA4;BRG1-associated factor 190A;Mitotic growth and trans…	hCG_29955;SMARCA4;hCG_29955;SMARCA4;BAF190A;BRG1;SMARCA4;SNF2B;SNF2L4	S1609	1.13469		0.92088	28.28	0.799324	34.13	3.31692		2.03265	63.74	1.1529	59.05	0.993293	34.66	0.971941	41.57	0.999977	DSEGEESEEEEEG	GO:0005634	GO:0005524;GO:0003677;GO:0004386	GO:0006355	4	8	0.92088	28.283	5	0.84471	17.237	5	0.868	34.131	5	0.81157		1	1.0395		1	3.6019		1	1.1529	59.046	10	1.0534	27.506
F5H0X5	SMARCA4 isoform 2;SMARCA4 isoform 4;SMARCA4 isoform 1;SWI/SNF related, matrix associated, actin dependent regulator of chromatin, subfamily a, member 4, isoform CRA_f;SMARCA4 isoform 3;SMARCA4 isoform 2;SWI/SNF related, matrix associated, actin dependent regulator of chromatin, subfamily a, member 4, isoform CRA_c;ATP-dependent helicase SMARCA4;BRG1-associated factor 190A;Mitotic growth and trans…	hCG_29955;SMARCA4;hCG_29955;SMARCA4;BAF190A;BRG1;SMARCA4;SNF2B;SNF2L4	S1622	1.13469		0.92088	28.28	0.799324	34.13	3.31692		2.03265	63.74	1.1529	59.05	0.993293	34.66	0.971941	41.57	0.542825	EEEGSESESRSVK	GO:0005634	GO:0005524;GO:0003677;GO:0004386	GO:0006355	4	8	0.92088	28.283	5	0.84471	17.237	5	0.868	34.131	5	0.81157		1	1.0395		1	3.6019		1	1.1529	59.046	10	1.0534	27.506
F5H0X5	SMARCA4 isoform 2;SMARCA4 isoform 4;SMARCA4 isoform 1;SWI/SNF related, matrix associated, actin dependent regulator of chromatin, subfamily a, member 4, isoform CRA_f;SMARCA4 isoform 3;SMARCA4 isoform 2;SWI/SNF related, matrix associated, actin dependent regulator of chromatin, subfamily a, member 4, isoform CRA_c;ATP-dependent helicase SMARCA4;BRG1-associated factor 190A;Mitotic growth and trans…	hCG_29955;SMARCA4;hCG_29955;SMARCA4;BAF190A;BRG1;SMARCA4;SNF2B;SNF2L4	S674	1.44847	0.18	1.7328		2.40443		1.72166	7.48	1.05433	2.23	1.2071	11.74	1.58516	8.24	1.22726	2.37	0.956908	EPIDETSQMSDIP	GO:0005634	GO:0005524;GO:0003677;GO:0004386	GO:0006355	4	0	1.7328		1	1.9495		1	1.3876		1	1.1963	0.18187	2	1.0529	4.0753	2	0.99357	7.4831	2	1.2071	11.742	6	1.4405	6.3601
F5H0X5	SMARCA4 isoform 2;SMARCA4 isoform 4;SMARCA4 isoform 1;SWI/SNF related, matrix associated, actin dependent regulator of chromatin, subfamily a, member 4, isoform CRA_f;SMARCA4 isoform 3;SMARCA4 isoform 2;SWI/SNF related, matrix associated, actin dependent regulator of chromatin, subfamily a, member 4, isoform CRA_c;ATP-dependent helicase SMARCA4;BRG1-associated factor 190A;Mitotic growth and trans…	hCG_29955;SMARCA4;hCG_29955;SMARCA4;BAF190A;BRG1;SMARCA4;SNF2B;SNF2L4	S677	1.35934	18.1	1.6032		1.74941		2.1757	5.84	0.875432		0.88226		1.14491		0.922403		0.956908	DETSQMSDIPVKV	GO:0005634	GO:0005524;GO:0003677;GO:0004386	GO:0006355	4	0	1.6032		1	1.4906		1	1.0912		1	1.1794	18.1	3	1.4299	15.121	3	1.3571	5.8443	3	0.88226		1	1.2188
F5H0X5	SMARCA4 isoform 2;SMARCA4 isoform 4;SMARCA4 isoform 1;SWI/SNF related, matrix associated, actin dependent regulator of chromatin, subfamily a, member 4, isoform CRA_f;SMARCA4 isoform 3;SMARCA4 isoform 2;SWI/SNF related, matrix associated, actin dependent regulator of chromatin, subfamily a, member 4, isoform CRA_c;ATP-dependent helicase SMARCA4;BRG1-associated factor 190A;Mitotic growth and trans…	hCG_29955;SMARCA4;hCG_29955;SMARCA4;BAF190A;BRG1;SMARCA4;SNF2B;SNF2L4	S759	1.04491	20.86	0.9007	17.94	0.903762	28.71	0.868122	27.54	1.10255	26.79	0.93023	33.18	1.02111	23.51	0.970602	22.25	1	KIPDPDSDDVSEV	GO:0005634	GO:0005524;GO:0003677;GO:0004386	GO:0006355	0	0	0.9007	17.937	35	0.93131	23.885	35	1.0034	28.707	35	0.86199	20.856	19	0.88096	14.31	19	0.96383	27.542	19	0.93023	33.181	31	0.92106	34.21
F5H0X5	SMARCA4 isoform 2;SMARCA4 isoform 4;SMARCA4 isoform 1;SWI/SNF related, matrix associated, actin dependent regulator of chromatin, subfamily a, member 4, isoform CRA_f;SMARCA4 isoform 3;SMARCA4 isoform 2;SWI/SNF related, matrix associated, actin dependent regulator of chromatin, subfamily a, member 4, isoform CRA_c;ATP-dependent helicase SMARCA4;BRG1-associated factor 190A;Mitotic growth and trans…	hCG_29955;SMARCA4;hCG_29955;SMARCA4;BAF190A;BRG1;SMARCA4;SNF2B;SNF2L4	S763	1.38356	16.31	1.3618	7.91	1.60475	12.02	1.2449	27.9	1.29418	25.73	0.98743	16.59	1.10089	16.22	0.875821	11.34	1	PDSDDVSEVDARH	GO:0005634	GO:0005524;GO:0003677;GO:0004386	GO:0006355	0	0	1.3618	7.9136	5	1.5071	10.406	5	1.1784	12.023	5	0.98427	16.306	11	0.86024	36.403	11	0.91416	27.9	11	0.98743	16.592	3	1.0099	22.337
F5H0Z5	Protein FAM195A	C16orf14;FAM195A	S82			0.93325		0.828931												0.680088	APSTSPSFEGTQE				n/a	n/a	0.93325		1	0.84706		1	0.88822		1
F5H126	IPCA-7;Prostate cancer-associated protein 7;Synaptotagmin VII;Synaptotagmin-7	PCANAP7;SYT7	S61			1.0059	9.07	0.82858	36.13											0.999929	TVGTPDSGRGRSE	GO:0016020;GO:0008021	GO:0005215		n/a	n/a	1.0059	9.0686	2	0.95192	10.076	2	0.82372	36.13	2
F5H174	Chloride conductance inducer protein Mat-8;FXYD domain-containing ion transport regulator 3;Mammary tumor 8 kDa protein;Phospholemman-like	FXYD3;MAT8;PLML	S141																	0.996901	PIITPGSAQS___		GO:0005216		n/a	n/a
F5H174	Chloride conductance inducer protein Mat-8;FXYD domain-containing ion transport regulator 3;Mammary tumor 8 kDa protein;Phospholemman-like	FXYD3;MAT8;PLML	S144																	0.999993	TPGSAQS______		GO:0005216		n/a	n/a
F5H1B6	Myosin phosphatase-targeting subunit 1;Protein phosphatase 1 regulatory subunit 12A;Protein phosphatase myosin-binding subunit	MBS;MYPT1;PPP1R12A	S299	1.00322	34.35	1.0577	20.68	1.20377	52.5	1.19636	34.34	1.00104	37.12	1.0621	25.84	1.45062	30.41	1.29534	23.26	0.999995	EKRDKKSPIIEST				0	0	1.0577	20.677	22	1.0575	39.196	22	1.1381	52.495	22	1.0543	34.35	28	1.0988	31.329	29	1.1311	34.342	29	1.0621	25.844	37	1.2979	35.251
F5H1B6	Myosin phosphatase-targeting subunit 1;Protein phosphatase 1 regulatory subunit 12A;Protein phosphatase myosin-binding subunit	MBS;MYPT1;PPP1R12A	S409																	0.352538	GQATPTSPIKKFP				n/a	n/a
F5H1B6	Myosin phosphatase-targeting subunit 1;Protein phosphatase 1 regulatory subunit 12A;Protein phosphatase myosin-binding subunit	MBS;MYPT1;PPP1R12A	S422			0.98956	28.47	0.939627	17.33					0.95638	15.61	1.30355	4.67			0.999939	TTATKISPKEEER				n/a	n/a	0.98956	28.471	8	0.85538	32.951	8	0.94954	17.33	8										0.95638	15.605	5	1.1032	18.778
F5H1B6	Myosin phosphatase-targeting subunit 1;Protein phosphatase 1 regulatory subunit 12A;Protein phosphatase myosin-binding subunit	MBS;MYPT1;PPP1R12A	S445	0.770863		0.83523	44.2	0.920841	32.32	0.665261		0.345605		0.53593	33.16	1.07272	5.44	0.480167		0.543756	GIRKTGSYGAIAE				0	3	0.83523	44.196	8	0.74629	35.955	8	1.1025	32.324	8	1.0835		1	1.6238		1	0.7965		1	0.53593	33.164	2	0.93525	14.229
F5H1B6	Myosin phosphatase-targeting subunit 1;Protein phosphatase 1 regulatory subunit 12A;Protein phosphatase myosin-binding subunit	MBS;MYPT1;PPP1R12A	S871	1.01206	15.72	0.95337	6.27	0.847946	8.58	0.900668	13.94	0.813489	9.96	0.91607	6.55	0.895083	40.35	0.916894	7.43	0.783177	NEQEQQSDTEEGS				0	0	0.95337	6.2739	10	0.78246	7.8567	10	0.88942	8.5771	10	0.94201	15.715	12	0.86421	16.659	12	0.94472	13.937	12	0.91607	6.5458	11	0.89242	48.12
F5H1B6	Myosin phosphatase-targeting subunit 1;Protein phosphatase 1 regulatory subunit 12A;Protein phosphatase myosin-binding subunit	MBS;MYPT1;PPP1R12A	T408																	0.352538	SGQATPTSPIKKF				n/a	n/a
F5H1B6	Myosin phosphatase-targeting subunit 1;Protein phosphatase 1 regulatory subunit 12A;Protein phosphatase myosin-binding subunit	MBS;MYPT1;PPP1R12A	T619			1.0585		0.979758												0.903749	IWAEDSTEKEKDS				n/a	n/a	1.0585		1	1.4119		1	0.92561		1
F5H1E9	DNA replication licensing factor MCM2;Minichromosome maintenance protein 2 homolog;Nuclear protein BM28	BM28;CCNL1;CDCL1;KIAA0030;MCM2	S12											1.4062		1.45246				0.496256	ESFTMASSPAQRR	GO:0005634	GO:0005524;GO:0003677	GO:0006270	n/a	n/a
F5H1E9	DNA replication licensing factor MCM2;Minichromosome maintenance protein 2 homolog;Nuclear protein BM28	BM28;CCNL1;CDCL1;KIAA0030;MCM2	S120	1.09384	18.35	1.09835	28.685	1.08644	34.765	1.02003	25.91	0.691075	37.305	0.97293	30.895	1.05865	63.155	0.931386	20.705	0.999987	RGIIYDSDEEDEE	GO:0005634	GO:0005524;GO:0003677	GO:0006270	0	0	1.0982	43.179	147	0.98822	38.523	147	0.94411	36.529	147	1.0646	21.311	98	0.92641	27.492	98	0.8999	28.303	98	0.78246	46.243	142	0.95301	39.431
F5H1E9	DNA replication licensing factor MCM2;Minichromosome maintenance protein 2 homolog;Nuclear protein BM28	BM28;CCNL1;CDCL1;KIAA0030;MCM2	S13	1.34732	12.97	1.2185	5.45	0.965235	8.12	1.15372	13.98	0.749711	23.335	1.08933	10.985	1.08075	16.33	0.97671	11.83	0.980936	SFTMASSPAQRRR	GO:0005634	GO:0005524;GO:0003677	GO:0006270	0	0																			0.87216	18.143	3	0.83949	8.2729
F5H1E9	DNA replication licensing factor MCM2;Minichromosome maintenance protein 2 homolog;Nuclear protein BM28;Putative uncharacterized protein MCM2;Putative uncharacterized protein MCM2	BM28;CCNL1;CDCL1;KIAA0030;MCM2;MCM2;MCM2	S26	0.994034		1.05723	15.55	0.609097	18.3	0.959769		0.629788	25.15	1.0531	2.54	1.10351	46.71	0.489276	8.01	0.868646	GNDPITSSPGRSS	GO:0005634	GO:0005524;GO:0003677	GO:0006270	0	3	0.99276		1	0.86431		1	0.85708		1	1.1648		1	0.91589		1	0.92112		1	0.844		1	1.0519
F5H1E9	DNA replication licensing factor MCM2;Minichromosome maintenance protein 2 homolog;Nuclear protein BM28;Putative uncharacterized protein MCM2;Putative uncharacterized protein MCM2	BM28;CCNL1;CDCL1;KIAA0030;MCM2;MCM2;MCM2	S41	1.09258	28.33	1.1247	42.9	1.1779	19.37	1.17632	22.44	0.560473	33.03	0.85489	15.78	1.16094	41.47	1.02937	31.07	0.985497	TDAITSSPGRDIP	GO:0005634	GO:0005524;GO:0003677	GO:0006270	0	0	1.1247	42.9	15	1.2027	59.799	15	1.0473	19.371	15	1.0294	28.334	16	1.1447	24.863	16	1.0459	22.438	16	0.85489	15.777	24	1.0757	18.582
F5H1E9	DNA replication licensing factor MCM2;Minichromosome maintenance protein 2 homolog;Nuclear protein BM28;Putative uncharacterized protein MCM2;Putative uncharacterized protein MCM2	BM28;CCNL1;CDCL1;KIAA0030;MCM2;MCM2;MCM2	T25	1.17087		1.13885	0.79	0.976382	21.41	1.05748		0.719711	7.23	1.09814	29.58	1.38705	18.28	0.942019	94.98	0.505808	RGNDPITSSPGRS	GO:0005634	GO:0005524;GO:0003677	GO:0006270	0	0	1.0181	0.78622	2	1.0056	7.8748	2	0.8996	21.407	2	1.0551		1	0.84386		1	0.839		1	0.88537		1	1.0364
F5H1E9	DNA replication licensing factor MCM2;Minichromosome maintenance protein 2 homolog;Nuclear protein BM28;Putative uncharacterized protein MCM2;Putative uncharacterized protein MCM2	BM28;CCNL1;CDCL1;KIAA0030;MCM2;MCM2;MCM2	T39	1.0325	11.22	1.042	6.8	0.852814	8.84	0.893421	10.31	0.522489	14.14	0.73603	40.21	0.603184	20.93	0.735404	14.22	0.716122	RRTDAITSSPGRD	GO:0005634	GO:0005524;GO:0003677	GO:0006270	0	0	1.042	6.7986	4	0.81593	5.0384	4	0.81844	8.8432	4	1.0092	11.215	9	0.91444	17.86	9	0.85741	10.313	9	0.73603	40.205	2	0.56411	104.47
F5H1H0			S1179	0.91183	29.83	0.97885	18.74	1.00361	33.96	0.989422	25.2	0.993631	16.66	1.17	25.3	0.918579	19.04	0.872293	21.17	0.998718	ETFGEYSDNEEKA				0	0	0.97885	18.737	25	1.0284	30.248	25	1.0253	33.961	25	1.0735	29.834	24	1.1262	25.963	24	1.0108	25.202	24	1.17	25.303	25	0.89057	22.96
F5H1H0	Neural cell adhesion molecule L1	CAML1;L1CAM;MIC5	S1241																	0.454324	AAGGNDSSGATSP				n/a	n/a
F5H1H0	Neural cell adhesion molecule L1	CAML1;L1CAM;MIC5	S1242																	0.454324	AGGNDSSGATSPI				n/a	n/a
F5H1U2	RING finger protein 4	RES4-26;RNF4	S94	0.873815	22.49	0.97308		0.839437		0.668117	33.96	0.613183	13.72	0.72466	22.84	0.714892	9.4	0.509465	13.88	0.845621	ADSCVVSSDDEEI		GO:0008270		0	0	0.97308		1	0.79244		1	0.86266		1	1.1136	22.486	5	0.69291	26.956	5	0.6866	33.957	5	0.72466	22.843	6	0.95231	9.8289
F5H1U9	Multi-PDZ domain protein 1;Multiple PDZ domain protein;MPDZ protein;cDNA, FLJ79388, highly similar to Multiple PDZ domain protein	MPDZ;MUPP1;MPDZ	S1607									1.3268	17.36	1.1229	5	1.15052	46.33	1.08026	15.33	0.499916	SIMVPQSGSPEPE				n/a	0																			1.1229	4.9967	2	1.0247	21.003
F5H1U9	Multi-PDZ domain protein 1;Multiple PDZ domain protein;MPDZ protein;cDNA, FLJ79388, highly similar to Multiple PDZ domain protein	MPDZ;MUPP1;MPDZ	S1609									1.3268	17.36	1.1229	5	1.15052	46.33	1.08026	15.33	0.499916	MVPQSGSPEPESI				n/a	0																			1.1229	4.9967	2	1.0247	21.003
F5H2M7	Erythrocyte 65 kDa protein;Kinase deficient protein;Protein kinase lysine-deficient 1;Protein kinase with no lysine 1;Serine/threonine-protein kinase WNK1	KDP;KIAA0344;PRKWNK1;WNK1	S2509	1.34879	31.52	0.83768	6.37	0.749749	10.35	0.689034	18.87	1.14228		0.69768	19.01	0.802751	0.59	0.720215		0.607371	SHINGPSSDPEAA		GO:0005524;GO:0004674		0	0	0.83768	6.3676	3	0.69428	4.2475	3	0.89503	10.353	3	0.62106	31.516	2	0.59296	42.078	2	0.82255	18.871	2	0.69768	19.014	2	0.89806	11.193
F5H2M7	Erythrocyte 65 kDa protein;Kinase deficient protein;Protein kinase lysine-deficient 1;Protein kinase with no lysine 1;Serine/threonine-protein kinase WNK1	KDP;KIAA0344;PRKWNK1;WNK1	S2510	1.03534	8.87	0.83768	6.37	0.749749	10.35	0.639921	24.34			0.78635		1.09138				0.499345	HINGPSSDPEAAF		GO:0005524;GO:0004674		0	n/a	0.83768	6.3676	3	0.69428	4.2475	3	0.89503	10.353	3	0.80909	8.867	3	0.56503	19.898	3	0.76392	24.339	3	0.78635		1	1.0384
F5H2X7	CDKN1A-interacting zinc finger protein 1;Cip1-interacting zinc finger protein;Nuclear protein NP94;Zinc finger protein 356;CDKN1A interacting zinc finger protein 1;CIZ1 protein;cDNA, FLJ79292, highly similar to Cip1-interacting zinc finger protein	CIZ1;LSFR1;NP94;ZNF356;CIZ1;RP11-395P17.7-022	S888																	0.423518	ITAIFTSSGRPPS	GO:0005634	GO:0003676;GO:0008270		n/a	n/a
F5H2X7	CDKN1A-interacting zinc finger protein 1;Cip1-interacting zinc finger protein;Nuclear protein NP94;Zinc finger protein 356;CDKN1A interacting zinc finger protein 1;CIZ1 protein;cDNA, FLJ79292, highly similar to Cip1-interacting zinc finger protein	CIZ1;LSFR1;NP94;ZNF356;CIZ1;RP11-395P17.7-022	S889																	0.423518	TAIFTSSGRPPSQ	GO:0005634	GO:0003676;GO:0008270		n/a	n/a
F5H2X7	CDKN1A-interacting zinc finger protein 1;Cip1-interacting zinc finger protein;Nuclear protein NP94;Zinc finger protein 356;CDKN1A interacting zinc finger protein 1;CIZ1 protein;cDNA, FLJ79292, highly similar to Cip1-interacting zinc finger protein;CDKN1A interacting zinc finger protein 1;cDNA FLJ14381 fis, clone HEMBA1001824, highly similar to Homo sapiens nuclear protein NP94 mRNA;Putative uncha…	CIZ1;LSFR1;NP94;ZNF356;CIZ1;RP11-395P17.7-022;CIZ1;RP11-395P17.7-021	T244	1.23526	10.44	1.0729	29.42	1.02085	24.44	0.720667	17.98	0.991114	25.05	0.83986	69.24	0.851954	28.85	0.994058	16.02	1	IAKEKRTPAPEPE	GO:0005634	GO:0003676;GO:0008270		0	0	1.0729	29.421	11	1.0385	21.419	11	0.95149	24.438	11	0.86856	10.439	3	0.72691	37.669	3	0.6717	17.982	3	0.83986	69.235	15	0.95303	31.346
F5H301	Tight junction protein 2;Tight junction protein ZO-2;Zona occludens protein 2;Zonula occludens protein 2	TJP2;X104;ZO2	S1010	0.790976	22.08	0.69488	12.22	0.569176	25.05	0.699814	27.87	0.490167		0.67349	14.74	0.844287	16.48	0.738549		0.948127	MRRAASSDQIRDN	GO:0005737;GO:0005923			0	7	0.69488	12.222	9	0.61685	23.277	9	0.8191	25.046	9	0.87851	22.076	10	0.84135	22.801	10	1.0071	27.868	10	0.67349	14.738	9	0.81064	10.276
F5H301	Tight junction protein 2;Tight junction protein ZO-2;Zona occludens protein 2;Zonula occludens protein 2	TJP2;X104;ZO2	S1017	0.870651	9.02	0.62067	20.35	0.557418	17.32	0.658096	16.87	0.783791	18.09	0.64785	25.11	0.645511	16.9	0.601406	17.51	1	DQIRDNSPPPAFK	GO:0005737;GO:0005923			0	0	0.62067	20.354	30	0.56223	21.396	30	0.89809	17.323	29	0.71288	9.015	23	0.75952	18.121	23	1.0603	16.865	23	0.64785	25.106	28	0.63893	18.334
F5H301	Tight junction protein 2;Tight junction protein ZO-2;Zona occludens protein 2;Zonula occludens protein 2	TJP2;X104;ZO2	S1187	1.56123	1.87	1.1026	7.41	0.924662	5.24	0.92926	10.15	0.79088		1.1221	14.03	1.1396	9.02	0.987325		0.743856	YQDTRGSYGSDAE	GO:0005737;GO:0005923			0	0	1.1026	7.414	3	0.9305	13.315	3	0.83862	5.2397	3	0.70624	1.8686	2	0.73709	15.608	2	0.84279	10.145	2	1.1221	14.033	4	1.1706	12.243
F5H301	Tight junction protein 2;Tight junction protein ZO-2;Zona occludens protein 2;Zonula occludens protein 2;Tight junction protein 2 (Zona occludens 2)	TJP2;X104;ZO2;RP11-16N10.1-001;TJP2	S161	0.92855	18.83	0.86214	19.25	0.747501	23.06	0.746217	16.11	0.802781	16.09	0.89197	23.95	0.839228	74.73	0.91748	12.33	1	VAAIQASPPIDQD	GO:0005737;GO:0005923			0	0	0.86214	19.252	15	0.79096	20.745	15	0.86703	23.055	15	0.92848	18.828	3	0.88412	25.067	3	0.86554	16.111	3	0.89197	23.947	13	0.92678	36.017
F5H301	Tight junction protein 2;Tight junction protein ZO-2;Zona occludens protein 2;Zonula occludens protein 2;Tight junction protein 2 (Zona occludens 2)	TJP2;X104;ZO2;RP11-16N10.1-001;TJP2	S199	0.915417		0.90316	13.39	0.584706	13.85	0.72932		0.905474	16.76	1.0106	13.57	0.74266	20.91	1.05901	18.25	0.499824	NSHGGRSRSWEDS	GO:0005737;GO:0005923			0	0	0.90316	13.393	2	0.56962	2.7054	2	0.6474	13.846	2	0.98661		1	0.67034		1	0.80752		1	1.0106	13.569	3	0.85309	4.4003
F5H301	Tight junction protein 2;Tight junction protein ZO-2;Zona occludens protein 2;Zonula occludens protein 2;Tight junction protein 2 (Zona occludens 2)	TJP2;X104;ZO2;RP11-16N10.1-001;TJP2	S205	0.935422	22.17	0.93879	14.37	0.757848	37.11	0.797474	27.2	0.994196	9	0.94383	14.2	1.00254	11.85	0.930569	10.6	1	SRSWEDSPERGRP	GO:0005737;GO:0005923			0	0	0.93879	14.369	20	0.77302	13.868	20	0.80726	37.106	20	1.0036	22.172	10	0.75912	21.618	10	0.84947	27.197	10	0.94383	14.202	11	0.9239	10.324
F5H301	Tight junction protein 2;Tight junction protein ZO-2;Zona occludens protein 2;Zonula occludens protein 2	TJP2;X104;ZO2	S275	0.897814	14.19	1.2072	20.19	0.837924	46.07	0.843863	35.77	0.834497	15.15	1.1592	11.685	1.50655	33.09	1.11291	18.03	1	DRSRGRSIDQDYE	GO:0005737;GO:0005923			0	0	1.1381	20.189	24	0.96093	14.82	24	0.87079	46.074	24	1.1454	14.191	20	1.0807	21.313	20	0.83863	35.765	20	1.106	18.242	43	1.1866	13.886
F5H301	Tight junction protein 2;Tight junction protein ZO-2;Zona occludens protein 2;Zonula occludens protein 2	TJP2;X104;ZO2	S317																	1	RGPRSRSREHPHS	GO:0005737;GO:0005923			n/a	n/a										0.75606	21.619	2	0.67477	3.0391	2	0.45973	4.6288	2
F5H301	Tight junction protein 2;Tight junction protein ZO-2;Zona occludens protein 2;Zonula occludens protein 2	TJP2;X104;ZO2	S323	0.888304	62.65	0.75719	11.76	0.617867	23	0.72061	43.88	0.913443	23.45	0.79	11.13	0.756512	17.38	0.664011	11.08	1	SREHPHSRSPSPE	GO:0005737;GO:0005923			0	0	0.75719	11.758	5	0.66209	2.6889	5	0.816	23	5	0.8524	62.652	6	0.78361	18.655	6	0.95169	43.878	6	0.79	11.134	6	0.81912	8.7375
F5H301	Tight junction protein 2;Tight junction protein ZO-2;Zona occludens protein 2;Zonula occludens protein 2	TJP2;X104;ZO2	S325	0.888304	62.65	0.75719	11.76	0.617867	23	0.72061	43.88	0.913443	23.45	0.79	11.13	0.756512	17.38	0.664011	11.08	1	EHPHSRSPSPEPR	GO:0005737;GO:0005923			0	0	0.75719	11.758	5	0.66209	2.6889	5	0.816	23	5	0.8524	62.652	6	0.78361	18.655	6	0.95169	43.878	6	0.79	11.134	6	0.81912	8.7375
F5H301	Tight junction protein 2;Tight junction protein ZO-2;Zona occludens protein 2;Zonula occludens protein 2	TJP2;X104;ZO2	S327	0.888304	62.65	0.75719	11.76	0.617867	23	0.72061	43.88	0.913443	23.45	0.79	11.13	0.756512	17.38	0.664011	11.08	1	PHSRSPSPEPRGR	GO:0005737;GO:0005923			0	0	0.75719	11.758	5	0.66209	2.6889	5	0.816	23	5	0.8524	62.652	6	0.78361	18.655	6	0.95169	43.878	6	0.79	11.134	6	0.81912	8.7375
F5H301	Tight junction protein 2;Tight junction protein ZO-2;Zona occludens protein 2;Zonula occludens protein 2	TJP2;X104;ZO2	S425			0.84184		0.624595												0.600377	TIINIPSINDSDS	GO:0005737;GO:0005923			n/a	n/a	0.84184		1	0.70583		1	0.74194		1
F5H301	Tight junction protein 2;Tight junction protein ZO-2;Zona occludens protein 2;Zonula occludens protein 2	TJP2;X104;ZO2	S429	0.7239	16.45	0.72036		14.4043		0.671822	18.02	0.960466		0.86563	12.21	0.978248	17.01	0.822167		0.774839	IPSINDSDSEIED	GO:0005737;GO:0005923			3	0	0.72036		1				19.996		1	0.99511	16.446	9	0.87692	17.154	9	0.93262	18.02	9	0.86563	12.209	2	0.88671	3.1247
F5H301	Tight junction protein 2;Tight junction protein ZO-2;Zona occludens protein 2;Zonula occludens protein 2	TJP2;X104;ZO2	S431	0.7239	16.45	0.72036		14.4043		0.671822	18.02	0.960466		0.86563	12.21	0.978248	17.01	0.822167		0.914661	SINDSDSEIEDIS	GO:0005737;GO:0005923			3	0	0.72036		1				19.996		1	0.99511	16.446	9	0.87692	17.154	9	0.93262	18.02	9	0.86563	12.209	2	0.88671	3.1247
F5H301	Tight junction protein 2;Tight junction protein ZO-2;Zona occludens protein 2;Zonula occludens protein 2	TJP2;X104;ZO2	S455	1.06542	25.48	1.0099	22.75	1.01111	28.74	1.01	25.22	1.01947	30.04	1.0173	20.69	1.27447	16.89	1.08627	8.93	0.995283	ERRHQYSDYDYHS	GO:0005737;GO:0005923			0	0	1.0099	22.747	16	0.95269	28.7	16	1.0012	28.739	16	0.94789	25.479	22	0.94276	19.72	22	1.0001	25.224	22	1.0173	20.685	15	1.2324	30.515
F5H301	Tight junction protein 2;Tight junction protein ZO-2;Zona occludens protein 2;Zonula occludens protein 2	TJP2;X104;ZO2	S462	1.0371	19.68	0.99225	29.86	0.821464	14	1.11856	21.67	1.39839	26.74	1.3019	62.48	0.918321	26.58	1.618	18.88	0.852099	DYDYHSSSEKIKE	GO:0005737;GO:0005923			0	0	0.99225	29.856	3	0.80243	1.5323	3	0.82788	13.999	3	0.95675	19.675	6	1.0282	8.5115	6	1.1273	21.671	6	1.3019	62.484	2	0.72019	20.894
F5H301	Tight junction protein 2;Tight junction protein ZO-2;Zona occludens protein 2;Zonula occludens protein 2	TJP2;X104;ZO2	S463	0.754024	10.98	0.84511		0.505283		0.808762	25.67	1.07379	30.04	1.0715	24.47	1.51639	5.44	1.14415	8.93	0.965627	YDYHSSSEKIKER	GO:0005737;GO:0005923			0	0	0.84511		1	1.1475		1	0.59789		1	1.1208	10.978	2	1.2234	15.414	2	0.95699	25.67	2	1.0715	24.47	3	1.1636	25.08
F5H301	Tight junction protein 2;Tight junction protein ZO-2;Zona occludens protein 2;Zonula occludens protein 2	TJP2;X104;ZO2	S471	0.999411		1.0188	17.25	0.794827	22.27	0.484042		0.584	7.89	0.55007	43.69	0.219351	50.7	0.541318	4.31	0.967587	KIKERPSSREDTP	GO:0005737;GO:0005923			5	1	1.0188	17.248	5	0.69729	8.2406	5	0.78016	22.271	5	1.0194		1	0.85783		1	0.47511		1	0.55007	43.693	2	0.58664	31.314
F5H301	Tight junction protein 2;Tight junction protein ZO-2;Zona occludens protein 2;Zonula occludens protein 2	TJP2;X104;ZO2	S492									0.269171	27.32	0.24262		0.347311		0.272365	22	0.499554	TPTPFKSTGDIAG	GO:0005737;GO:0005923			n/a	7										0.96614		1	1.1952		1	0.99242		1	0.24262		1	0.84674
F5H301	Tight junction protein 2;Tight junction protein ZO-2;Zona occludens protein 2;Zonula occludens protein 2	TJP2;X104;ZO2	S983																	0.331859	VSSITRSSEPVQH	GO:0005737;GO:0005923			n/a	n/a
F5H301	Tight junction protein 2;Tight junction protein ZO-2;Zona occludens protein 2;Zonula occludens protein 2	TJP2;X104;ZO2	S984			0.74902		0.645618												0.700615	SSITRSSEPVQHE	GO:0005737;GO:0005923			n/a	n/a	0.74902		1	0.62394		1	0.86195		1
F5H301	Tight junction protein 2;Tight junction protein ZO-2;Zona occludens protein 2;Zonula occludens protein 2	TJP2;X104;ZO2	S992											0.90651	5.97	1.11256	6.12			0.331859	PVQHEESIRKPSP	GO:0005737;GO:0005923			n/a	n/a										0.92146	6.0304	2	0.85334	2.2256	2	1.0476	20.256	2	0.90651	5.9724	7	0.97568	14.084
F5H301	Tight junction protein 2;Tight junction protein ZO-2;Zona occludens protein 2;Zonula occludens protein 2	TJP2;X104;ZO2	T493									0.269171	27.32	0.24262		0.347311		0.272365	22	0.499554	PTPFKSTGDIAGT	GO:0005737;GO:0005923			n/a	7										0.96614		1	1.1952		1	0.99242		1	0.24262		1	0.84674
F5H3A1	Sodium pump subunit alpha-1;Sodium/potassium-transporting ATPase subunit alpha-1	ATP1A1	S16	1.14106		0.057894	165.74	0.0429973	37.1	0.0503747		1.14468	11.66	1.2002	37.16	1.50517	17.5	0.967937	32.51	1	YEPAAVSEQGDKK	GO:0016021	GO:0005524;GO:0015662;GO:0046872;GO:0015077	GO:0006754	2	0	0.057894	165.74	3	0.054078	190.44	3	0.74269	37.098	3	0.050737		1	0.046723		1	0.87012		1	1.2002	37.163	11	1.3645	30.329
F5H4D0	Protein CLEC16A	CLEC16A;KIAA0350	S863	1.19385	22.2	0.94522	17.47	1.04494	26.89	1.11971	9.57									0.991235	DQGRRGSSDPTVQ				0	n/a	0.94522	17.468	4	1.3689	16.523	4	1.1055	26.89	4	0.79174	22.195	4	0.8849	41.254	4	1.1846	9.5706	4
F5H4E6	JmjC domain-containing histone demethylation protein 2A;Jumonji domain-containing protein 1A;Lysine-specific demethylase 3A	JHDM2A;JMJD1;JMJD1A;KDM3A;KIAA0742;TSGA	S445	1.33254		1.0562	9.99	0.878368	16.54	1.05652				0.9714	14.97	0.864905	11.8			0.999466	HIEHAPSPSDVSN				0	n/a	1.0562	9.9857	4	0.92201	10.365	4	0.83163	16.538	4	0.79262		1	0.76062		1	1.0003		1	0.9714	14.97	6	0.7316	18.649
F5H4T9	Ovarian cancer-overexpressed gene 1 protein;Solute carrier family 35 member C2;Solute carrier family 35, member C2	C20orf5;CGI-15;OVCOV1;SLC35C2;RP11-394O2.1-005;SLC35C2	S364	0.876297	13.52	0.922565	4.13	0.897093	20.4	1.04231	6.7	0.836544	20.37	0.91313	16.81	0.855566	5.23	1.01809	7.39	0.93425	AIKGIGSSPDIEI	GO:0016021			0	0	0.64733	1.9499	2	0.94079	36.219	2	1.0256	34.403	2
F5H527	Protein phosphatase Slingshot homolog 2;SSH-like protein 2	KIAA1725;SSH2;SSH2L	S488																	0.750717	KIWRSHSDSDISD		GO:0004725;GO:0008138		n/a	n/a										0.85752	11.59	2	0.93273	18.215	2	1.2509	5.3678	2
F5H527	Protein phosphatase Slingshot homolog 2;SSH-like protein 2	KIAA1725;SSH2;SSH2L	S490																	0.439503	WRSHSDSDISDHH		GO:0004725;GO:0008138		n/a	n/a
F5H527	Protein phosphatase Slingshot homolog 2;SSH-like protein 2	KIAA1725;SSH2;SSH2L	S811	0.969667	49.11	1.1732	36.19	1.1915	24.18	1.16487	30.38			1.0823	14.72	1.20676	9.29			1	HTPKKNSIHEIII		GO:0004725;GO:0008138		0	n/a	1.1732	36.185	8	1.1505	25.314	8	1.0156	24.179	8	1.2099	49.109	11	1.4239	22.398	12	0.9929	30.377	12	1.0823	14.722	6	1.1679	14.919
F5H527	Protein phosphatase Slingshot homolog 2;SSH-like protein 2	KIAA1725;SSH2;SSH2L	S926	1.17398		1.1439	16.14	1.00997	57.89	0.997973		1.09669		0.90979	2.59	0.894314	10.01	0.709536		0.999999	ISTRKNSKNDSSV		GO:0004725;GO:0008138		0	0	1.1439	16.142	6	1.0251	32.191	6	0.88292	57.89	6	0.97438		1	0.84834		1	0.87243		1	0.90979	2.5874	2	0.89274	22.262
F5H5D3	Alpha-tubulin 6;Tubulin alpha-1C chain;Tubulin alpha-6 chain	TUBA1C;TUBA6	S509																	0.999997	EEVGADSADGEDE		GO:0005525;GO:0003924;GO:0005198	GO:0007018;GO:0051258	n/a	n/a
F5H5P2	cDNA FLJ55733, highly similar to 2-oxoisovalerate dehydrogenase alpha subunit, mitochondrial (EC 1.2.4.4);2-oxoisovalerate dehydrogenase subunit alpha, mitochondrial;Branched-chain alpha-keto acid dehydrogenase E1 component alpha chain	BCKDHA	S371	1.05002	9.48	1.2217	18.46	1.5672	29.17	1.98734	27.38			0.45639	100.78	0.213933	157.81			0.873961	YRIGHHSTSDDSS		GO:0016624		0	n/a	1.2217	18.458	11	1.3606	42.838	11	1.2828	29.167	11	1.1635	9.4823	15	1.8308	9.4761	15	1.6267	27.377	15	0.45639	100.78	4	1.2796	17.176
F5H5P2	cDNA FLJ55733, highly similar to 2-oxoisovalerate dehydrogenase alpha subunit, mitochondrial (EC 1.2.4.4);2-oxoisovalerate dehydrogenase subunit alpha, mitochondrial;Branched-chain alpha-keto acid dehydrogenase E1 component alpha chain	BCKDHA	S373			1.143		1.72136												0.468449	IGHHSTSDDSSAY		GO:0016624		n/a	n/a	1.143		1	1.3286		1	1.506		1
F5H5P2	cDNA FLJ55733, highly similar to 2-oxoisovalerate dehydrogenase alpha subunit, mitochondrial (EC 1.2.4.4);2-oxoisovalerate dehydrogenase subunit alpha, mitochondrial;Branched-chain alpha-keto acid dehydrogenase E1 component alpha chain	BCKDHA	S381	1.19934	13.07	1.24	16.64	1.5407	18.31	1.84686	27.24	1.17414	34.71	1.3984	17.79	0.937809	16.06	1.01004	14.23	0.999999	DSSAYRSVDEVNY		GO:0016624		0	0	1.24	16.637	8	1.5407	18.651	8	1.2425	18.308	8	1.0339	13.065	4	1.7257	25.879	4	1.4894	27.235	4	1.3984	17.794	19	0.97551	16.494
F5H5P2	cDNA FLJ55733, highly similar to 2-oxoisovalerate dehydrogenase alpha subunit, mitochondrial (EC 1.2.4.4);2-oxoisovalerate dehydrogenase subunit alpha, mitochondrial;Branched-chain alpha-keto acid dehydrogenase E1 component alpha chain	BCKDHA	T372											1.7151		0.681375				0.468449	RIGHHSTSDDSSA		GO:0016624		n/a	n/a										1.2724		1	1.5237		1	1.6024		1	1.7151		1	1.0725
F5H5R1	cDNA FLJ54447;Uncharacterized protein KIAA0528	KIAA0528	S260																	0.902354	FIPACNSPSKEMK				n/a	n/a
F5H5R1	cDNA FLJ54447;Uncharacterized protein KIAA0528	KIAA0528	S672	0.999604	22.71	1.0098	17.3	1.05049	27.11	1.06504	11.32	0.901772	21.85	1.0227	28.64	1.01702	53.52	1.29157	20.29	0.965389	RIIRSQSESSDEV				0	0	1.0098	17.301	11	1.0703	28.737	11	1.0403	27.107	11	1.0102	22.71	11	1.1325	20.271	11	1.0547	11.32	11	1.0227	28.638	22	0.95785	21.502
F5H5R1	cDNA FLJ54447;Uncharacterized protein KIAA0528	KIAA0528	S674	0.891224	20.25	0.86709	10.75	0.712852	46.11	0.921283	10.99	0.770064	21.85	0.87333	23.63	0.900491	6.52	1.10293	20.29	0.56544	IRSQSESSDEVTE				0	0	0.86709	10.745	3	0.96679	32.313	3	0.82212	46.108	3	0.97292	20.248	8	1.0374	18.593	8	1.0625	10.991	8	0.87333	23.625	6	0.87722	14.052
F5H6B8	Splicing factor, arginine/serine-rich 8;Suppressor of white apricot protein homolog	SFRS8;SWAP	S279			0.86387	13.65	0.666726	6.73			1.15046	15.92	1.0856		1.1313		0.947555	5.2	0.592077	SDEKKKSGVSSDN		GO:0003723	GO:0006396	n/a	0	0.86387	13.65	3	0.7255	14.269	3	0.77179	6.7273	3										1.0856		1	1.0515
F5H6B8	Splicing factor, arginine/serine-rich 8;Suppressor of white apricot protein homolog	SFRS8;SWAP	S604	0.899613	13.7	1.0001	9.43	0.80296	14.61	0.774517	26.24	1.26037	22.64	1.2644	4.25	1.09606	10.99	0.969542	96.05	0.572316	VKIDDDSDDDEES		GO:0003723	GO:0006396	0	0	1.0001	9.431	7	0.80539	13.382	7	0.80288	14.614	7	1.1117	13.696	6	0.81572	29.084	6	0.77444	26.241	6	1.2644	4.2453	3	1.0845	9.7859
F5H6B8	Splicing factor, arginine/serine-rich 8;Suppressor of white apricot protein homolog	SFRS8;SWAP	S743	0.730083	13.52	0.46453		0.512051		0.508335	21.79	0.801219	43.3	0.64438	17.91	0.701665	13.05	0.817589	7.09	0.837006	PPDRPSSKSKDPP		GO:0003723	GO:0006396	2	0	0.46453		1	0.56409		1	1.1023		1	0.63627	13.521	7	0.77455	17.775	7	1.0943	21.794	7	0.64438	17.912	8	0.80302	9.2386
F5H6B8	Splicing factor, arginine/serine-rich 8;Suppressor of white apricot protein homolog	SFRS8;SWAP	S886			1.1205	15.04	1.1791	10.57											0.91708	AYRVSRSPGASRK		GO:0003723	GO:0006396	n/a	n/a	1.1205	15.037	5	0.90399	51.167	5	1.0523	10.569	5
F5H6B8	Splicing factor, arginine/serine-rich 8;Suppressor of white apricot protein homolog	SFRS8;SWAP	S945	0.927496	17.05	0.9607	0.48	0.521948	14.99	0.389939	107.29	1.10325	15.97	0.70905		0.292405		0.486465	53.16	0.998922	AHSASVSPVESRG		GO:0003723	GO:0006396	2	1	0.9607	0.47652	2	0.46869	3.9018	2	0.5433	14.992	2	1.0358	17.053	2	0.44205	48.183	2	0.40589	107.29	2	0.70905		1	0.56809
F5H6C8			S24	0.81326	20.91	0.73012	6.77	0.880233	8.88	0.685057	23.45	1.1133	9.5	0.74727	2.73	0.782168	33.4	0.932593	11.06	0.998119	QAIQTISPRAIPR				0	0
F5H6C8	CARD adapter inducing interferon beta;Interferon beta promoter stimulator protein 1;Mitochondrial antiviral-signaling protein;Putative NF-kappa-B-activating protein 031N;Virus-induced-signaling adapter	IPS1;KIAA1271;MAVS;VISA	S81			1.0525		1.62285				1.00089	9.68	0.94333	1.51	1.07049	2.72	0.983988	13.43	0.999959	PSRGPVSPSVSFQ				n/a	0	1.0525		1	1.8496		1	1.5419		1										0.94333	1.5136	2	0.97842	3.5356
F5H6K1	Dystrophin	DMD	S1605									1.07429		0.66971		1.01307		2.21172		0.783765	AVEGMPSNIDSEV		GO:0003779;GO:0008270		n/a	4
F5H7N3			S170	1.35701		1.2212	4.47	1.54677	9.97	1.21887										0.992776	ESERSRSQSSQIK				0	n/a	1.2212	4.4701	2	1.4285	3.8866	2	1.2666	9.9651	2	0.89992		1	0.57766		1	0.99809		1
F5H7N3			S280	1.01375	20.09	0.8699	18.77	0.874945	20.06	0.853937	18.37	0.97828	33.63	0.91612	9.83	0.930045	10.54	0.795174	20.19	0.998484	SPGEDASPGAGHE				0	0	0.8699	18.772	20	0.89707	18.252	20	1.0058	20.063	20	0.8581	20.089	10	0.81359	22.55	10	0.98165	18.372	10	0.91612	9.8322	12	0.86456	16.323
F5H7N3			S299	1.04042		0.85069	10.96	0.990714	14.92	0.631544		1.32727	25.07	0.8657		0.385747		0.749809	17.32	0.931649	VRGAPGSPTQERP				0	6	0.85069	10.961	6	0.94463	19.916	6	1.1646	14.921	6										0.8657		1	0.36827
F5H7N3	Absent in melanoma 1 protein;Beta/gamma crystallin domain-containing protein 1	AIM1;CRYBG1	S427	1.16966	9.14	1.1074		0.912276		1.18614	12.13	1.70646		1.3671		0.874233		2.05995		0.888977	RRGSQKSTDSPGA				0	6	1.1074		1	1.0592		1	0.8238		1	0.94677	9.1393	4	1.052	14.316	4	1.0711	12.134	4	1.3671		1	0.67664
F5H7N3	Absent in melanoma 1 protein;Beta/gamma crystallin domain-containing protein 1	AIM1;CRYBG1	S430	1.01853	5.01	0.96297	20.6	0.74454	29.04	1.00409	13.29	1.0199	9.41	0.90358		1.01237		1.03306	5.98	0.987478	SQKSTDSPGADAE				0	0	0.96297	20.599	6	0.95269	27.833	6	0.77317	29.044	6	0.94545	5.0102	3	0.89835	12.073	3	1.0427	13.29	3	0.90358		1	0.86137
F5H7N3	Absent in melanoma 1 protein;Beta/gamma crystallin domain-containing protein 1	AIM1;CRYBG1	S483	1.1733		0.91053	22.12	1.21692	67.78	1.06496		0.984081	18.58	0.98664	18.5	1.0262	12.38	0.851579	11.21	0.930136	GVASAASPESKPS				0	0	0.91053	22.122	9	1.3575	42.547	9	1.3365	67.778	9	0.77604		1	0.75297		1	1.1696		1	0.98664	18.498	6	0.93859	7.252
F5H7N3	Absent in melanoma 1 protein;Beta/gamma crystallin domain-containing protein 1	AIM1;CRYBG1	S489	0.984889	17.62	0.85251	62.62	1.46436	34.5	1.00716	13.79	0.949934	3.56	1.0815		1.23529		1.04568	75.63	0.818423	SPESKPSPGTKGQ				0	0	0.85251	62.618	4	1.7821	21.568	4	1.7177	34.503	4	0.86559	17.619	10	1.2092	16.819	10	1.1814	13.787	10	1.0815		1	1.3227
F5H7N3	Absent in melanoma 1 protein;Beta/gamma crystallin domain-containing protein 1	AIM1;CRYBG1	S892																	0.969252	KDTCVQSPISSFP				n/a	n/a
F5H7W8	Uncharacterized protein C12orf43	C12orf43	S139	1.88428		1.7472		1.49125		2.22506		0.891649	22.83	0.939085	13.44	0.628957	62.79	1.06746	11.77	1	GREKEESPQPRRK				4	0	1.7472		1	1.3972		1	0.85351		1	0.92725		1	0.94273		1	1.2735		1	0.94055	13.442	12	1.0564	11.929
F5H7W8	Uncharacterized protein C12orf43	C12orf43	T183	0.978416	31.04	0.86716	118.05	0.72838	26	0.801533	17.39	1.16786	31.81	0.96741	10.98	0.96236	12.11	0.872672	11.95	0.542348	AIHSPGTVEKEAK				0	0	0.86716	118.05	6	0.78995	25.426	6	0.83996	26	6	0.88629	31.04	3	0.79683	28.622	3	0.92432	17.387	3	0.96741	10.978	5	0.99276	19.661
F5H820	Triple homeobox protein 1;Zinc finger and homeodomain protein 3;Zinc fingers and homeoboxes protein 3	KIAA0395;TIX1;ZHX3	S723			1.6592	16.63	2.08064	14.49					0.75003	35.29	1.11874	6.05			1	IAERKVSPIKINI	GO:0005737;GO:0005730	GO:0043565;GO:0003700;GO:0008270		n/a	n/a	1.6592	16.63	3	1.6125	2.8346	3	1.254	14.485	3										0.75003	35.286	6	1.2369	21.366
F6QR24	153 kDa nucleoporin;Nuclear pore complex protein Nup153;Nucleoporin Nup153;NUP153 variant protein	NUP153;NUP153 variant protein	S192	1.04243	34.8	1.2752	23.01	1.36268	15.9	1.36612	26.8	0.59976	36.38	0.69908	22.38	0.643629	28.78	0.574798	18.34	0.991524	GFSSRASDKDITV	GO:0005737;GO:0031965;GO:0005730	GO:0008270		0	0	1.2752	23.005	15	1.2276	11.281	15	1.0686	15.901	15	1.2233	34.797	10	1.367	27.382	10	1.0713	26.8	10	0.69908	22.376	8	0.66874	39.652
F6QR24	153 kDa nucleoporin;Nuclear pore complex protein Nup153;Nucleoporin Nup153;NUP153 variant protein	NUP153;NUP153 variant protein	S209	0.645115	0	0.93832	2.16	0.88523	24.26	1.08292	0	1.08067	15.61	0.84647	10.16	0.858913	17.76	0.977419	12.32	1	SIPPIWSPEAERS	GO:0005737;GO:0031965;GO:0005730	GO:0008270		0	0
F6QR24	153 kDa nucleoporin;Nuclear pore complex protein Nup153;Nucleoporin Nup153;NUP153 variant protein	NUP153;NUP153 variant protein	S333			0.9682		0.944779				0.876639		0.73763		0.42486		0.643656		0.483401	RIPSIVSSPINSP	GO:0005737;GO:0031965;GO:0005730	GO:0008270		n/a	1	0.9682		1	1.0215		1	0.97581		1										0.73763		1	0.55238
F6QR24	153 kDa nucleoporin;Nuclear pore complex protein Nup153;Nucleoporin Nup153;NUP153 variant protein	NUP153;NUP153 variant protein	S334	0.75252	1.68	0.92575	16.6	0.950375	8.91	0.869566	6.19	1.10443	15.11	1.0297	11.06	0.901873	17.13	0.891195	7.44	0.981306	IPSIVSSPINSPI	GO:0005737;GO:0031965;GO:0005730	GO:0008270		0	0	0.92575	16.599	8	1.0225	13.305	8	1.0266	8.908	8	1.2302	1.6771	2	1.0318	14.563	2	0.93931	6.1938	2	1.0297	11.063	8	0.97615	15.803
F6QR24	153 kDa nucleoporin;Nuclear pore complex protein Nup153;Nucleoporin Nup153;NUP153 variant protein	NUP153;NUP153 variant protein	S338	0.75252	1.68	0.92575	15.79	0.956207	11.08	0.869566	6.19	1.05482	22.97	0.96012	18.62	0.853259	21.98	0.864406	15.47	0.999995	VSSPINSPIDRSG	GO:0005737;GO:0031965;GO:0005730	GO:0008270		0	0	0.92575	15.792	16	0.99989	13.576	16	1.0329	11.078	16	1.2302	1.6771	2	1.0318	14.563	2	0.93931	6.1938	2	0.96012	18.617	11	0.94813	20.57
F6QWW5	EPS-15-interacting protein 3;Epsin-3;cDNA FLJ54001, highly similar to Epsin-3	EPN3	S292	1.03851	26.14	1.208	17.69	0.836141	15.58	0.985414	27.32	1.513		1.0512	24.59	1.13256	39.59	0.824614		0.994557	SWQGDGSPMANGA				0	0	1.208	17.688	11	0.90051	15.619	11	0.69217	15.581	11	1.1632	26.141	20	0.87741	30.706	20	0.81574	27.318	20	1.0512	24.592	22	1.2185	24.781
F6QWW5	EPS-15-interacting protein 3;Epsin-3	EPN3	S477			0.79087		0.792373												0.673627	PSGKPSSPVEIDI				n/a	n/a	0.79087		1	0.7725		1	1.0019		1
F6QWW5	EPS-15-interacting protein 3;Epsin-3	EPN3	S488			1.1199		0.559916				1.16856		1.0132	8.72	0.76755	6.92	0.791208		0.372957	DIFGDPSPSSKQN				n/a	0	1.1199		1	0.66277		1	0.49997		1										1.0132	8.7223	2	0.7396	36.345
F6SH78	Elongation of very long chain fatty acids protein 5;Fatty acid elongase 1	ELOVL2;ELOVL5;PRO0530	S312	1.19654	11.01	0.82692	13.58	1.32158	9.37	0.832543	20.28	1.09975		1.1367	26.67	1.25742	24.77	1.36711		0.78385	GHTNSFSPIENNV	GO:0016021			0	0	0.82692	13.579	10	1.2871	9.1415	10	1.5982	9.3737	10	0.69109	11.012	6	0.77265	15.266	6	1.0068	20.276	6	1.1367	26.673	20	1.0985	18.117
F6XS94	Antigen MLAA-22;Breast cancer-overexpressed gene 1 protein;UPF0378 protein KIAA0100;KIAA0100 protein	BCOX1;KIAA0100;KIAA0100	S2094			1.0514	30.43	1.04574	39.5					1.203	52.91	1.15766	44.42			1	RRSFRKSPEHPVD				n/a	n/a	1.0514	30.425	10	0.99225	27.052	10	0.99462	39.495	10										1.203	52.912	6	0.8843	23.582
F8VNW9	Homeobox protein PBX2;Pre-B-cell leukemia transcription factor 2;Protein G17	G17;PBX2	S351	1.29766	23.76	1.0983	28.43	0.952116	59.03	1.25316	11.49			1.997		2.22246				0.999986	VTQGGHSRTSSPT	GO:0005634	GO:0043565;GO:0003700		0	n/a	1.0983	28.425	5	1.2201	22.922	5	0.8669	59.03	5	0.84637	23.759	2	1.2113	25.369	2	1.141	11.491	2	1.997		1	2.7238
F8VPJ2	Kinesin-like protein GAKIN;Kinesin-like protein KIF13B;Putative uncharacterized protein KIF13B	GAKIN;KIAA0639;KIF13B;KIF13B	S1410	0.913879	27.72	1.041	19.39	0.95061	16.69	0.814551	29.3	0.431863		0.75658	26.23	0.943985	19.92	0.768988		0.999201	NKGRWESQQDVSQ	GO:0005874	GO:0005524;GO:0003777	GO:0007018	0	7	1.041	19.389	3	0.80376	9.3799	3	0.91317	16.69	3	1.1391	27.717	6	1.1568	18.876	6	0.78247	29.297	6	0.75658	26.227	8	1.058	14.11
F8VQY2	Putative uncharacterized protein UIMC1;BRCA1-A complex subunit RAP80;Receptor-associated protein 80;Retinoid X receptor-interacting protein 110;Ubiquitin interaction motif-containing protein 1	UIMC1;RAP80;RXRIP110;UIMC1	S142	0.916724	9.8	1.4718	18.94	2.23669	28.67	1.6153	40.95									0.799541	TGPSSQSHQEKTT				4	n/a	1.4718	18.936	4	1.9181	14.657	4	1.5197	28.666	4	1.6055	9.7984	3	1.9906	23.721	3	1.0975	40.95	3
F8VQY2	Putative uncharacterized protein UIMC1;BRCA1-A complex subunit RAP80;Receptor-associated protein 80;Retinoid X receptor-interacting protein 110;Ubiquitin interaction motif-containing protein 1	UIMC1;RAP80;RXRIP110;UIMC1	S44			0.79625	24.81	0.618638	18.37			1.11388	21.29	0.94651	14.56	0.990712	23.9	0.914016	109.58	1	DAFIVISDSDGEE				n/a	0	0.79625	24.814	3	0.65225	17.692	3	0.77694	18.37	3										0.94651	14.563	27	0.92922	19.697
F8VQY2	Putative uncharacterized protein UIMC1;BRCA1-A complex subunit RAP80;Receptor-associated protein 80;Retinoid X receptor-interacting protein 110;Ubiquitin interaction motif-containing protein 1	UIMC1;RAP80;RXRIP110;UIMC1	S46			0.79625	24.81	0.618638	18.37			1.11388	21.29	0.94651	14.56	0.990712	23.9	0.914016	109.58	1	FIVISDSDGEEPK				n/a	0	0.79625	24.814	3	0.65225	17.692	3	0.77694	18.37	3										0.94651	14.563	27	0.92922	19.697
F8VQY2	Putative uncharacterized protein UIMC1;BRCA1-A complex subunit RAP80;Receptor-associated protein 80;Retinoid X receptor-interacting protein 110;Ubiquitin interaction motif-containing protein 1	UIMC1;RAP80;RXRIP110;UIMC1	S678	1.01702	0.91	1.18432	47.51	1.04764	126.91	1.84079	4.64	0.616711	11.12	0.61248	107.53	0.612841	15.79	0.593539	9.2	1	RRDINESPVKSFV				0	0	0.97994	47.508	4	1.0437	20.677	4	0.87238	126.91	4										0.56515		1	1.1293
F8VTL3	Cellular myosin heavy chain, type B;Myosin heavy chain 10;Myosin heavy chain, non-muscle IIb;Myosin-10;Non-muscle myosin heavy chain B;Non-muscle myosin heavy chain IIb	MYH10	S1987	0.795225	9.79	0.77936	17.25	0.752293	23.4	0.698743	21.06	0.741394	13.83	0.68722	26.92	0.871532	43.89	0.691824	26.46	0.995018	GASIEISDDDTES	GO:0016459	GO:0003779;GO:0005524;GO:0003774		0	0	0.77936	17.248	17	0.77549	20.051	17	0.96527	23.399	17	0.98005	9.792	12	0.84039	11.817	12	0.89656	21.055	12	0.68722	26.919	21	0.85165	19.952
F8VX10	Uncharacterized protein C12orf41	C12orf41	S351																	1	WRGDPDSEADSID				n/a	n/a										1.0944	6.2464	2	0.90278	0.29237	2	0.85126	10.75	2
F8VX10	Uncharacterized protein C12orf41	C12orf41	S355																	1	PDSEADSIDSDQE				n/a	n/a										1.0944	6.2464	2	0.90278	0.29237	2	0.85126	10.75	2
F8VX10	Uncharacterized protein C12orf41	C12orf41	S358																	1	EADSIDSDQEDPI				n/a	n/a										1.0944	6.2464	2	0.90278	0.29237	2	0.85126	10.75	2
F8VXC8	BRG1-associated factor 170;SWI/SNF complex 170 kDa subunit;SWI/SNF complex subunit SMARCC2;SWI/SNF-related matrix-associated actin-dependent regulator of chromatin subfamily C member 2	BAF170;SMARCC2	S283	1.0242	21.44	1.0666	19.34	1.06884	29.84	1.05772	19.18	1.03215	16.97	1.0562	18.31	1.09021	37.83	1.03589	24.99	0.99958	ITDEVNSPDSDRR	GO:0005634	GO:0003677		0	0	1.0666	19.34	75	1.0031	23.862	75	1.0021	29.836	75	1.0414	21.435	30	0.94955	16.862	30	0.99167	19.175	30	1.0562	18.31	41	0.99361	36.042
F8VXC8	BRG1-associated factor 170;SWI/SNF complex 170 kDa subunit;SWI/SNF complex subunit SMARCC2;SWI/SNF-related matrix-associated actin-dependent regulator of chromatin subfamily C member 2	BAF170;SMARCC2	S302	1.02538	104.46	1.0423		1.27484		1.30371	26.09	1.17366		1.0383	15.2	1.12707	32.26	1.22727		0.996426	YKKRKRSPSPSPT	GO:0005634	GO:0003677		0	0	1.0423		1	1.3245		1	1.2231		1	1.0165	104.46	21	1.1899	114.77	21	1.2508	26.092	21	1.0383	15.204	30	1.0859	12.979
F8VXC8	BRG1-associated factor 170;SWI/SNF complex 170 kDa subunit;SWI/SNF complex subunit SMARCC2;SWI/SNF-related matrix-associated actin-dependent regulator of chromatin subfamily C member 2	BAF170;SMARCC2	S304	1.13496	72.09	1.1681		0.973506		1.51725	19.04	1.03843	41.04	1.0403	13.47	1.12488	34.1	1.13039	31.83	0.923499	KRKRSPSPSPTPE	GO:0005634	GO:0003677		0	0	1.1681		1	1.0493		1	0.83341		1	1.0292	72.085	25	1.1901	73.229	25	1.2989	19.037	25	1.0403	13.468	29	1.0822	13.164
F8VXC8	BRG1-associated factor 170;SWI/SNF complex 170 kDa subunit;SWI/SNF complex subunit SMARCC2;SWI/SNF-related matrix-associated actin-dependent regulator of chromatin subfamily C member 2	BAF170;SMARCC2	S347	0.894346	21.83	0.816135	23.875	0.78442	29.225	0.594922	16.11	0.982924	40.185	0.829735	24.26	0.659374	19.275	0.666941	17.55	1	KDMDEPSPVPNVE	GO:0005634	GO:0003677		0	0	0.82723	14.629	13	0.76088	20.829	13	0.97741	22.951	13										0.73809	35.995	5	0.73756	48.067
F8VXC8	BRG1-associated factor 170;SWI/SNF complex 170 kDa subunit;SWI/SNF complex subunit SMARCC2;SWI/SNF-related matrix-associated actin-dependent regulator of chromatin subfamily C member 2	BAF170;SMARCC2	S844			0.74003		1.16703				1.66195	0.69	1.0934		1.05258		1.55339	41.67	1	EKESEKSDGDPIV	GO:0005634	GO:0003677		n/a	0
F8W0Q9	Gastric cancer antigen Ga50;Periphilin-1	HSPC206;HSPC232;PPHLN1	S151	1.2637	22.79	1.2238	10.53	1.09823	28.69	1.41428	30.05	1.0281	12.855	1.0976	10.825	1.12724	16.135	1.12473	15.88	0.996569	NTFFRESPVGRKD				0	0	1.2774	9.9299	2	1.0937	2.9429	2	0.74239	39.205	2	0.73145		1	0.96381		1	1.1368		1	1.1223	14.745	36	1.1159	18.024
F8W0Q9	Gastric cancer antigen Ga50;Periphilin-1	HSPC206;HSPC232;PPHLN1	S223	1.02584	8.39	0.857625	26.1	0.603978	98.69	0.75808	33.43	1.12939	32.595	0.98181	25.34	1.04682	48.76	1.09035	54.52	0.978822	KTSRDTSPSSGSA				0	0	0.78278		1	0.75054		1	0.72956		1										1.1235		1	1.1603
F8W6G1	Nuclear receptor-binding protein;Putative uncharacterized protein NRBP1;Putative uncharacterized protein NRBP1	BCON3;NRBP;NRBP1;NRBP1;NRBP1	S2									0.704286	4.31	1.3473		1.28558		0.475745	99.29	0.99476	_____MSEGESQT		GO:0005524;GO:0004672		n/a	3
F8W7I7	Zinc finger protein 48;Zinc finger protein 553	ZNF48;ZNF553	S541			0.78239		0.683034												0.602919	PPITPRSPSHSGE	GO:0005622	GO:0003676;GO:0008270		n/a	n/a	0.78239		1	0.64585		1	0.87301		1
F8W7I7	Zinc finger protein 48;Zinc finger protein 553	ZNF48;ZNF553	S543																	0.333333	ITPRSPSHSGEPF	GO:0005622	GO:0003676;GO:0008270		n/a	n/a
F8W7I7	Zinc finger protein 48;Zinc finger protein 553	ZNF48;ZNF553	S545	0.961915	17.34	0.61096		0.507182		0.529434	56.1			0.72006	219.49	0.549233	9.46			0.333333	PRSPSHSGEPFGI	GO:0005622	GO:0003676;GO:0008270		0	n/a	0.61096		1	0.57471		1	0.83014		1	0.63515	17.335	5	0.60638	14.054	6	0.86656	56.103	6	0.72006	219.49	8	0.59005	50.921
F8W8D1	Dnm1p/Vps1p-like protein;Dynamin family member proline-rich carboxyl-terminal domain less;Dynamin-1-like protein;Dynamin-like protein;Dynamin-like protein 4;Dynamin-like protein IV;Dynamin-related protein 1;cDNA FLJ59504, highly similar to Dynamin-1-like protein (EC 3.6.5.5)	DLP1;DNM1L;DRP1	S671	0.888391	15.73	0.75499	12.53	0.690597	20.51	0.925542	13.22	0.659629	18.36	0.78542	26.75	0.752362	21.06	0.631501	9.36	0.999999	IPIMPASPQKGHA		GO:0005525;GO:0003924		0	0	0.75499	12.53	20	0.698	25.177	20	0.91471	20.508	20	0.84984	15.732	10	1.0029	20.879	10	1.2259	13.217	10	0.78542	26.749	6	0.80092	11.981
F8W8J4	Fer-1-like protein 3;Myoferlin;Putative uncharacterized protein MYOF	FER1L3;KIAA1207;MYOF;MYOF	S1915	1.02079	29.26	0.80531	38.54	1.21988	23.2	1.14153	18.36	1.06842	10.36	0.93939	16.59	1.13582	15.11	1.20317	7.68	1	TIIPAKSPEKCRI	GO:0016021			0	0	0.80531	38.541	9	1.2449	60.943	9	1.5148	23.201	9	0.78891	29.261	18	1.1236	18.051	18	1.4175	18.361	18	0.93939	16.59	7	1.0512	22.242
F8W8Q7	256 kDa golgin;Golgin subfamily A member 4;Golgin-245;Protein 72.1;Trans-Golgi p230	GOLGA4	S288	1.50987	12.43	1.0122		0.446198		1.10998	11.44	1.0987	6.8	0.89284	11.68	0.770083	7.39	0.986856	28.75	1	KEENPESDGEPVV			GO:0000042	6	0
F8W8Q7	256 kDa golgin;Golgin subfamily A member 4;Golgin-245;Protein 72.1;Trans-Golgi p230;GOLGA4 protein;Putative uncharacterized protein GOLGA4;Putative uncharacterized protein GOLGA4	GOLGA4;GOLGA4;GOLGA4	S40																	0.332935	RMRSRTSSFTEQI			GO:0000042	n/a	n/a
F8W8Q7	256 kDa golgin;Golgin subfamily A member 4;Golgin-245;Protein 72.1;Trans-Golgi p230;GOLGA4 protein;Putative uncharacterized protein GOLGA4;Putative uncharacterized protein GOLGA4	GOLGA4;GOLGA4;GOLGA4	S41																	0.848782	MRSRTSSFTEQID			GO:0000042	n/a	n/a
F8W8Q7	256 kDa golgin;Golgin subfamily A member 4;Golgin-245;Protein 72.1;Trans-Golgi p230;GOLGA4 protein	GOLGA4	S93	1.41311	35.17	1.02837	10.26	1.03206	14.94	0.688836	37.39	0.817067	14.17	0.757605	24.49	0.941737	23.225	0.973371	24.335	0.999987	IQIRVPSVESIFR			GO:0000042	0	0	0.97575	5.7448	3	1.1523	33.709	3	1.1465	11.542	3										0.73994	20.746	5	1.1718	15.669
F8W8Q7	256 kDa golgin;Golgin subfamily A member 4;Golgin-245;Protein 72.1;Trans-Golgi p230;GOLGA4 protein;Putative uncharacterized protein GOLGA4;Putative uncharacterized protein GOLGA4	GOLGA4;GOLGA4;GOLGA4	T39																	0.332935	TRMRSRTSSFTEQ			GO:0000042	n/a	n/a
F8W8R6	Histone demethylase UTX;Lysine-specific demethylase 6A;Ubiquitously transcribed TPR protein on the X chromosome;Ubiquitously transcribed X chromosome tetratricopeptide repeat protein	KDM6A;UTX	S824			1.1824	19.48	0.790517	34.07											0.832507	TDNSVASSPSSAI		GO:0005488		n/a	n/a	1.1824	19.479	2	0.80412	7.7654	2	0.66857	34.068	2
F8W8R6	Histone demethylase UTX;Lysine-specific demethylase 6A;Ubiquitously transcribed TPR protein on the X chromosome;Ubiquitously transcribed X chromosome tetratricopeptide repeat protein	KDM6A;UTX	S836			1.1824	19.48	0.790517	34.07											0.985837	ISTATPSPKSTEQ		GO:0005488		n/a	n/a	1.1824	19.479	2	0.80412	7.7654	2	0.66857	34.068	2
F8W9B9	Exophilin-2;Granuphilin;Synaptotagmin-like protein 4	SYTL4	S218			1.0777	19.98	1.34745	26.95					0.95253	6.11	1.06636	17.22			0.999991	STSRRDSIDKSGI	GO:0008021	GO:0017137;GO:0005215;GO:0008270	GO:0006886	n/a	n/a	1.0777	19.98	5	1.159	21.443	5	1.2503	26.95	5										0.95253	6.1111	3	1.1448	5.5688
F8W9B9	Exophilin-2;Granuphilin;Synaptotagmin-like protein 4	SYTL4	S290	1.24503	59.81	0.83929	13.29	1.18676	14.02	1.06338	16.32	1.08836	22.38	0.78906	17.63	0.891085	21.67	0.858655	21.1	0.831802	VVHESGSIGDRSK	GO:0008021	GO:0017137;GO:0005215;GO:0008270	GO:0006886	0	0	0.83929	13.286	8	1.1787	10.611	8	1.414	14.023	8	0.67411	59.811	9	0.99958	18.908	9	1.267	16.315	9	0.78906	17.632	13	1.1084	21.105
F8W9H9	CCAAT-box-binding transcription factor;Nuclear factor 1 C-type;Nuclear factor I/C;TGGCA-binding protein	NFI;NFIC	S194									1.02745	18.42	1.1155		1.12989		1.11281	23.93	0.968705	DAEQSGSPRTGMG	GO:0005634	GO:0003677;GO:0003700	GO:0006260;GO:0006351	n/a	0																			1.1155		1	1.1156
F8W9H9	CCAAT-box-binding transcription factor;Nuclear factor 1 C-type;Nuclear factor I/C;TGGCA-binding protein	NFI;NFIC	S294	1.24463	8.13	0.84421		0.821838		0.676356	40.35	1.00952	9.57	0.93236	18.21	1.07939	3.65	1.06289	5.42	0.846294	EEDVDTSPGGDYY	GO:0005634	GO:0003677;GO:0003700	GO:0006260;GO:0006351	0	0	0.84421		1	0.74459		1	0.9735		1	0.67828	8.1275	3	0.54451	36.652	3	0.80117	40.346	3	0.93236	18.214	3	0.88073	12.78
F8W9H9	CCAAT-box-binding transcription factor;Nuclear factor 1 C-type;Nuclear factor I/C;TGGCA-binding protein	NFI;NFIC	S305									0.99105	2.61	0.93236	18.21	1.07939	3.65	1.03166	4.22	0.408496	YYTSPSSPTSSSR	GO:0005634	GO:0003677;GO:0003700	GO:0006260;GO:0006351	n/a	0										0.67828	8.1275	3	0.54451	36.652	3	0.80117	40.346	3	0.93236	18.214	3	0.88073	12.78
F8W9H9	CCAAT-box-binding transcription factor;Nuclear factor 1 C-type;Nuclear factor I/C;TGGCA-binding protein	NFI;NFIC	S322	1.27552		1.1107	7.26	1.19356	11	1.06261		0.305167	25.94	1.08705	16.21	1.13217	30.99	0.895365	14.86	0.881287	DMEGGISSPVKKT	GO:0005634	GO:0003677;GO:0003700	GO:0006260;GO:0006351	0	3	1.1107	7.2569	4	1.0867	9.1162	4	1.0746	11.001	4	1.1115		1	1.2829		1	1.2389		1	1.0257	16.212	23	1.2241	34.322
F8W9H9	CCAAT-box-binding transcription factor;Nuclear factor 1 C-type;Nuclear factor I/C;TGGCA-binding protein	NFI;NFIC	S333	1.23157	19.21	0.99022		1.12004		0.896545	32.79	1.05432	18.93	0.895	26.53	0.974924	28.34	0.808167	27.63	0.993779	KTEMDKSPFNSPS	GO:0005634	GO:0003677;GO:0003700	GO:0006260;GO:0006351	0	0	0.99022		1	0.79188		1	1.1311		1	0.80403	19.207	8	0.81212	34.609	8	0.9054	32.786	8	0.895	26.527	4	1.0785	18.138
F8WA73	E3 ubiquitin-protein ligase MIB2;Mind bomb homolog 2;Novel zinc finger protein;Putative NF-kappa-B-activating protein 002N;Skeletrophin;Zinc finger ZZ type with ankyrin repeat domain protein 1;cDNA FLJ46290 fis, clone TESTI4032913, highly similar to Ubiquitin ligase protein MIB2 (EC 6.3.2.-)	MIB2;SKD;ZZANK1	S369			1.2766		0.329427						0.93732	12.69	1.15234	9.19			0.550492	RRVSADSQPFQHG		GO:0008270		n/a	n/a	1.2766		1	1.1208		1	0.25805		1										0.93732	12.687	3	1.1135	9.7923
F8WAR4	Putative uncharacterized protein CHCHD3;Coiled-coil-helix-coiled-coil-helix domain containing 3;Coiled-coil-helix-coiled-coil-helix domain containing 3, isoform CRA_d;Coiled-coil-helix-coiled-coil-helix domain-containing protein 3, mitochondrial	CHCHD3;CHCHD3;hCG_2014841;tcag7.1158;CHCHD3	S46																	0.435992	SPSGSKSQRYSGA				n/a	n/a
F8WAR4	Putative uncharacterized protein CHCHD3;Coiled-coil-helix-coiled-coil-helix domain containing 3;Coiled-coil-helix-coiled-coil-helix domain containing 3, isoform CRA_d;Coiled-coil-helix-coiled-coil-helix domain-containing protein 3, mitochondrial	CHCHD3;CHCHD3;hCG_2014841;tcag7.1158;CHCHD3	S50	1.03803	14.07	1.0183	29.21	1.30342	29.38	1.42694	44.05	1.11415	18.36	1.0549	23.03	1.10975	10.11	1.13644	18.47	0.999999	SKSQRYSGAYGAS				0	0	1.0183	29.214	14	1.3293	15.316	14	1.28	29.381	14	0.98099	14.065	6	1.2584	21.147	6	1.4013	44.052	6	1.0549	23.029	11	1.1443	16.417
F8WBW0	130 kDa phosphatidylinositol 4,5-biphosphate-dependent ARF1 GTPase-activating protein;ADP-ribosylation factor-directed GTPase-activating protein 1;Arf-GAP with SH3 domain, ANK repeat and PH domain-containing protein 1;Development and differentiation-enhancing factor 1;PIP2-dependent ARF1 GAP	ASAP1;DDEF1;KIAA1249	S913	0.568932	19.19	0.88651	18.12	0.617773	177.54	0.754757	14.38									1	RKTDHISIDKATI		GO:0008060;GO:0008093;GO:0005543;GO:0017124;GO:0008270	GO:0046847;GO:0032312;GO:0007165	0	n/a	0.88651	18.116	2	2.197	37.465	2	0.69686	177.54	2	1.5582	19.187	2	1.1926	2.6393	2	0.85138	14.381	2
F8WBW0	130 kDa phosphatidylinositol 4,5-biphosphate-dependent ARF1 GTPase-activating protein;ADP-ribosylation factor-directed GTPase-activating protein 1;Arf-GAP with SH3 domain, ANK repeat and PH domain-containing protein 1;Development and differentiation-enhancing factor 1;PIP2-dependent ARF1 GAP	ASAP1;DDEF1;KIAA1249	T909																	0.499751	KVAIRKTDHISID		GO:0008060;GO:0008093;GO:0005543;GO:0017124;GO:0008270	GO:0046847;GO:0032312;GO:0007165	n/a	n/a
F8WCL5	Nebulin	NEB	S133			1.0158	54.06	0.940946	41.96											1	KVQDQISEVKYRM				n/a	n/a	1.0158	54.06	5	0.87274	20.281	5	0.92631	41.958	5
F8WCP6	Kinesin-like protein KIF2;Kinesin-like protein KIF21A;Renal carcinoma antigen NY-REN-62	KIAA1708;KIF2;KIF21A	S1212	0.893407		0.66599		1.04607		0.723398		0.763828		0.74018		1.01827		0.802503		1	AREKEISPPPGIP	GO:0005874	GO:0005524;GO:0003777	GO:0007018	0	0
F8WCP6	Kinesin-like protein KIF2;Kinesin-like protein KIF21A;Renal carcinoma antigen NY-REN-62	KIAA1708;KIF2;KIF21A	S1261	0.93351		0.75296		0.701729		0.84083										0.38148	AKEQKHSDSGTSE	GO:0005874	GO:0005524;GO:0003777	GO:0007018	0	n/a	0.75296		1	0.70856		1	0.93196		1	0.80659		1	0.93043		1	1.1167		1
F8WCP6	Kinesin-like protein KIF2;Kinesin-like protein KIF21A;Renal carcinoma antigen NY-REN-62	KIAA1708;KIF2;KIF21A	S1263																	0.376226	EQKHSDSGTSEAS	GO:0005874	GO:0005524;GO:0003777	GO:0007018	n/a	n/a
F8WCP6	Kinesin-like protein KIF2;Kinesin-like protein KIF21A;Renal carcinoma antigen NY-REN-62	KIAA1708;KIF2;KIF21A	S1274	0.851364		0.66953	14.02	0.538382	18	0.594161		0.520096	73.79	0.27175		0.380314		0.215862	41.02	0.732417	ASISPPSSPPSRP	GO:0005874	GO:0005524;GO:0003777	GO:0007018	0	2	0.66953	14.023	6	0.61505	7.1191	6	0.80412	17.996	6	0.78642		1	0.63922		1	0.88743		1	0.27175		1	0.34054
F8WCP6	Kinesin-like protein KIF2;Kinesin-like protein KIF21A;Renal carcinoma antigen NY-REN-62	KIAA1708;KIF2;KIF21A	S1275	0.887505	5.23	0.63706	14.58	0.505921	32.75	0.685031	13.85	0.817665	33.82	0.69468	19.81	0.927745	16.73	0.495085	49.16	0.711618	SISPPSSPPSRPR	GO:0005874	GO:0005524;GO:0003777	GO:0007018	0	3	0.63706	14.577	2	0.5848	31.379	2	0.79415	32.752	2	0.71781	5.2339	4	0.80634	10.972	4	1.0753	13.852	4	0.69468	19.805	7	0.98244	7.4723
F8WCP6	Kinesin-like protein KIF2;Kinesin-like protein KIF21A;Renal carcinoma antigen NY-REN-62	KIAA1708;KIF2;KIF21A	S864																	0.426798	PAQDTGSSAAAVE	GO:0005874	GO:0005524;GO:0003777	GO:0007018	n/a	n/a
F8WCP6	Kinesin-like protein KIF2;Kinesin-like protein KIF21A;Renal carcinoma antigen NY-REN-62	KIAA1708;KIF2;KIF21A	T1242			0.84462		1.28661				0.661695		1.0337	14.6	1.11836	7.08	1.13407		0.985475	PEPSPVTRRKAYE	GO:0005874	GO:0005524;GO:0003777	GO:0007018	n/a	0
F8WEA9	Kinase suppressor of Ras 1;Putative uncharacterized protein KSR1	KSR;KSR1;KSR1	S311	0.728881	18.6	1.2071	9.09	0.92412	6.82	0.938122	67.46									0.990909	TITRSKSHESQIG		GO:0005524;GO:0046872;GO:0004674	GO:0035556	0	n/a	1.2071	9.0904	2	1.104	9.0651	2	0.76557	6.8173	2	1.6561	18.6	5	1.2555	29.539	5	0.77717	67.457	5
G3V0I6	HIV-1-induced protein HIN-1;OTU domain-containing protein 4	HIN1;KIAA1046;OTUD4	S1024	0.70427	23.72	0.6228	15.02	0.431775	73.36	0.470949	40.77	0.768832	11.27	0.78367	24.8	1.13656	24.42	0.635948	4.91	0.999999	RPKEESSEDENEV				1	0	0.6228	15.021	3	0.61633	64.939	3	0.69328	73.358	3	0.88432	23.722	8	0.74585	22.641	8	0.75618	40.77	8	0.78367	24.795	10	1.1112	28.492
G3V0I6	HIV-1-induced protein HIN-1;OTU domain-containing protein 4	HIN1;KIAA1046;OTUD4	S545																	0.444633	DKYATVSSPSKSK				n/a	n/a
G3V0I6	HIV-1-induced protein HIN-1;OTU domain-containing protein 4	HIN1;KIAA1046;OTUD4	S546																	0.444633	KYATVSSPSKSKK				n/a	n/a
G3V0I6	HIV-1-induced protein HIN-1;OTU domain-containing protein 4	HIN1;KIAA1046;OTUD4	T543			0.68856	3.65	0.700266	40.35											0.754992	TDDKYATVSSPSK				n/a	n/a	0.68856	3.6465	2	0.71516	20.018	2	1.017	40.35	2
G3V125			S6	0.678354	14.96	0.96679	41.04	1.07546	24.81	0.613612	30.93			1.0068	0.67	1.03892	5.95			0.992802	_MSIKDSGSDISH	GO:0005634	GO:0003700;GO:0016747;GO:0008270		0	n/a	0.96679	41.037	5	1.1859	18.798	5	1.1124	24.814	5	1.4252	14.955	2	0.87745	9.6268	2	0.63469	30.934	2	1.0068	0.67396	2	1.2116	3.8732
G3V125			S8	1.00026		0.96331	0.51	0.90948	44.53	0.314608				1.0116		1.00083				0.994273	SIKDSGSDISHRP	GO:0005634	GO:0003700;GO:0016747;GO:0008270		5	n/a	0.96331	0.50962	2	1.1239	7.5947	2	0.94412	44.533	2	0.96306		1	0.72519		1	0.32659		1	1.0116		1	1.1788
G3V1N1	NF-kappa-B-repressing factor;Protein ITBA4;Transcription factor NRF	ITBA4;NKRF;NRF	S444	1.03927	9.31	1.2332	13.48	1.5875	7.43	1.57393	11.46	1.18927	10.82	1.2831	5.88	1.52958	8.23	1.49122	11.57	0.966405	QCHTGSSPRGSGK	GO:0005622	GO:0003725		0	0	1.2332	13.477	9	1.4708	22.49	9	1.2873	7.4277	9	1.1866	9.3128	10	1.3905	11.262	10	1.2763	11.456	10	1.2831	5.8828	6	1.2923	5.2279
G3V1N1	NF-kappa-B-repressing factor;Protein ITBA4;Transcription factor NRF	ITBA4;NKRF;NRF	S80																	0.333333	PVHFVASSSKDER	GO:0005622	GO:0003725		n/a	n/a
G3V1N1	NF-kappa-B-repressing factor;Protein ITBA4;Transcription factor NRF	ITBA4;NKRF;NRF	S81																	0.333333	VHFVASSSKDERQ	GO:0005622	GO:0003725		n/a	n/a
G3V1N1	NF-kappa-B-repressing factor;Protein ITBA4;Transcription factor NRF	ITBA4;NKRF;NRF	S82	1.91209	22.24	3.2276		2.94347		4.23461	17.16									0.333333	HFVASSSKDERQE	GO:0005622	GO:0003725		4	n/a	3.2276		1	3.9448		1	0.91197		1	1.688	22.236	4	2.767	9.3443	4	1.312	17.161	4
G3V1Z5	HLA-B-associated transcript 3;Large proline-rich protein BAT3;Protein G3;HLA-B associated transcript 3;HLA-B associated transcript 3, isoform CRA_a	BAT3;G3;BAT3;DADB-70P7.10-003;DAMA-236L13.16-003;DAMC-157M7.11-003;hCG_2005629	S1003	0.942045	7.31	0.88638		0.621716		0.727931	18.96	0.654486	0.31	0.64995	3.24	0.648559	40.11	0.6558	9.94	0.999507	PQRENASPAPGTT				0	0	0.88638		1	0.47152		1	0.70141		1	0.94091	7.3114	6	0.77349	10.724	6	0.82124	18.958	6	0.64995	3.2355	2	0.75576	8.2678
G3V1Z5	HLA-B-associated transcript 3;Large proline-rich protein BAT3;Protein G3;HLA-B associated transcript 3;HLA-B associated transcript 3, isoform CRA_a	BAT3;G3;BAT3;DADB-70P7.10-003;DAMA-236L13.16-003;DAMC-157M7.11-003;hCG_2005629	S1147	1.20435	5.45	0.84637	16.61	0.681929	17.29	0.652018	9.81	1.17688	94.63	0.84705	20.9	0.626233	29.14	0.576604	50.51	1	QEDPNYSPQRFPN				0	0	0.84637	16.61	12	0.73967	13.683	12	0.80571	17.294	12	0.70276	5.4456	4	0.57025	11.855	4	0.77037	9.8124	4	0.84705	20.903	6	0.82739	27.971
G3V1Z5	HLA-B-associated transcript 3;Large proline-rich protein BAT3;Protein G3;HLA-B associated transcript 3;HLA-B associated transcript 3, isoform CRA_a	BAT3;G3;BAT3;DADB-70P7.10-003;DAMA-236L13.16-003;DAMC-157M7.11-003;hCG_2005629	S994	1.07095	15.69	0.68996	9.34	0.482089	27.83	0.613319	23.51	0.628759	32.66	0.57031	23.16	0.569112	17.62	0.554701	24.91	1	QGAERASPEPQRE				1	0	0.68996	9.341	25	0.49052	15.423	25	0.69872	27.829	25	0.64425	15.686	7	0.5758	20.018	7	0.88892	23.51	7	0.57031	23.164	15	0.67355	18.849
G3V1Z5	HLA-B-associated transcript 3;Large proline-rich protein BAT3;Protein G3;HLA-B associated transcript 3;HLA-B associated transcript 3, isoform CRA_a	BAT3;G3;BAT3;DADB-70P7.10-003;DAMA-236L13.16-003;DAMC-157M7.11-003;hCG_2005629	T117	0.810884		0.64518		0.456142		0.584391										0.572405	GGSPPGTRGPGAS				1	n/a	0.64518		1	0.42903		1	0.707		1	0.79565		1	0.72757		1	0.90578		1
G3V1Z5	HLA-B-associated transcript 3;Large proline-rich protein BAT3;Protein G3;HLA-B associated transcript 3;HLA-B associated transcript 3, isoform CRA_a	BAT3;G3;BAT3;DADB-70P7.10-003;DAMA-236L13.16-003;DAMC-157M7.11-003;hCG_2005629	Y1146			0.92749		0.281558						0.8055		0.952262				0.5	IQEDPNYSPQRFP				n/a	n/a	0.92749		1	0.28398		1	0.30357		1										0.8055		1	1.0532
G3V4K3	Uncharacterized protein C14orf133;cDNA FLJ55735	C14orf133	S156																	0.450721	SISDAISDTPAKS				n/a	n/a
G3V599	cTAGE family member 5;Cutaneous T-cell lymphoma-associated antigen 5;Meningioma-expressed antigen 6/11	CTAGE5;MEA11;MEA6;MGEA11;MGEA6	S1052									1.27408	7.05	0.72573	10.2	0.708037	17.29	0.766153	14.66	0.51515	AFGREHSPYGPSP				n/a	0																			0.72573	10.197	5	0.85427	4.6113
G3V599	cTAGE family member 5;Cutaneous T-cell lymphoma-associated antigen 5;Meningioma-expressed antigen 6/11	CTAGE5;MEA11;MEA6;MGEA11;MGEA6	S1071	0.948342	4.57	0.92305	5.44	1.04203	19.21	0.921693	3.73	0.925996	10.76	0.793245	5.35	0.834756	18.415	0.934601	7.49	1	ETRAFISPPTIIE				0	0																			0.76257	2.0265	2	0.95328	3.4005
G3V599	cTAGE family member 5;Cutaneous T-cell lymphoma-associated antigen 5;Meningioma-expressed antigen 6/11	CTAGE5;MEA11;MEA6;MGEA11;MGEA6	S1094	1.28847	52.15	1.4217	17.97	1.8357	11.35	1.52463	22.77	1.16448	15.39	0.96772	7.4	1.02472	20.53	0.947262	25.1	1	GGGGRGSRGPGNP				0	0	1.4217	17.97	8	1.9921	18.862	8	1.2912	11.346	8	1.1034	52.147	12	1.4459	29.085	12	1.0724	22.765	12	0.96772	7.4022	22	1.0721	20.172
G3V599	cTAGE family member 5;Cutaneous T-cell lymphoma-associated antigen 5;Meningioma-expressed antigen 6/11	CTAGE5;MEA11;MEA6;MGEA11;MGEA6	S1129	0.977446	2.68	0.73156	16.94	0.643729	16.92	0.179291	107.98	1.27243		0.9004		0.839857		0.610516		0.793023	APSDTGSISPPWD				5	0	0.73156	16.936	4	0.76153	5.9291	4	0.87994	16.92	4	0.74844	2.6756	2	0.47536	2.2187	2	0.24508	107.98	2	0.9004		1	0.90103
G3V599	cTAGE family member 5;Cutaneous T-cell lymphoma-associated antigen 5;Meningioma-expressed antigen 6/11	CTAGE5;MEA11;MEA6;MGEA11;MGEA6	S1131	0.927717	5.18	0.73901	19.87	0.668641	13.07	0.565224	84.07	1.27243		0.9004		0.839857		0.610516		0.987291	SDTGSISPPWDQD				0	0	0.73901	19.872	17	0.75089	15.494	17	0.90478	13.066	17	0.79659	5.1768	5	0.7172	24.804	5	0.76484	84.074	5	0.9004		1	0.90103
G3V599	cTAGE family member 5;Cutaneous T-cell lymphoma-associated antigen 5;Meningioma-expressed antigen 6/11	CTAGE5;MEA11;MEA6;MGEA11;MGEA6	S1166	1.01837		1.0201		1.20963		1.42375		1.09421	16.01	1.0663	10.58	1.06371	3.57	1.26772	33.2	0.820143	DRFCSNSGRISGP				0	0	1.0201		1	1.1204		1	1.1858		1	1.0017		1	1.4669		1	1.3957		1	1.0663	10.582	2	1.0465	3.5239
G3V599	cTAGE family member 5;Cutaneous T-cell lymphoma-associated antigen 5;Meningioma-expressed antigen 6/11	CTAGE5;MEA11;MEA6;MGEA11;MGEA6	S1170	0.950995	29.13	1.0421	30.63	1.30023	26.6	1.02279	38.94	1.09689	12.35	1.0861	12.99	1.04134	28.34	1.14812	12.91	1	SNSGRISGPAEIR				0	0	1.0421	30.626	30	1.2642	22.561	30	1.2477	26.597	30	1.0958	29.128	11	1.2076	37.969	10	0.98147	38.937	11	1.0861	12.99	15	0.9648	26.323
G3V599	cTAGE family member 5;Cutaneous T-cell lymphoma-associated antigen 5;Meningioma-expressed antigen 6/11;Cancer/testis antigen 21.2;Protein cTAGE-2	CTAGE5;MEA11;MEA6;MGEA11;MGEA6;CTAGE1;CTAGE2	S1182	0.965229	19.535	0.90233	14.395	0.796514	25.86	0.949296	14.34	0.717822	141.425	0.89394	8.425	0.80641	25.77	0.894271	9.425	1	RSFNMPSIDKMDG				0	0	0.94469	19.802	16	0.86844	23.378	16	0.92122	20.99	16	0.88081	22.489	8	1.0203	22.913	8	1.0105	24.976	8	1.136	10.723	2	1.0014	30.02
G3V599	Putative uncharacterized protein LOC389592;LOC643854 protein;cTAGE family member 5;Cutaneous T-cell lymphoma-associated antigen 5;Meningioma-expressed antigen 6/11;cTAGE family member 6;Putative protein cTAGE-6;Cutaneous T-cell lymphoma-associated antigen 4	LOC389592;tcag7.1206;LOC643854;CTAGE5;MEA11;MEA6;MGEA11;MGEA6;CTAGE6;CTAGE4	S672			1.0345		1.25257				1.26198	15.81	1.1024	6.79	1.07716	5.12	1.03645	20.93	0.5	CEKINRSNSEIED				n/a	0	1.0345		1	1.3934		1	1.2108		1										1.1024	6.7889	3	1.0873	4.7664
G3V599	Putative uncharacterized protein LOC389592;LOC643854 protein;cTAGE family member 5;Cutaneous T-cell lymphoma-associated antigen 5;Meningioma-expressed antigen 6/11;cTAGE family member 6;Putative protein cTAGE-6;Cutaneous T-cell lymphoma-associated antigen 4	LOC389592;tcag7.1206;LOC643854;CTAGE5;MEA11;MEA6;MGEA11;MGEA6;CTAGE6;CTAGE4	S674	1.45435		1.013	14.34	1.08502	23.06	0.870187		1.3095	9.96	1.0514	12.26	0.927682	13.57	0.990471	15.2	0.945227	KINRSNSEIEDEI				0	0	1.013	14.337	10	1.0618	12.083	10	1.0711	23.058	10	0.69653		1	0.82972		1	0.85902		1	1.0514	12.255	6	0.92515	14.674
G3V599	cTAGE family member 5;Cutaneous T-cell lymphoma-associated antigen 5;Meningioma-expressed antigen 6/11	CTAGE5;MEA11;MEA6;MGEA11;MGEA6	T1118									0.988794		0.81002		0.696326		0.687796		0.780009	SSCDRITDPHRAP				n/a	0																			0.81002		1	0.72632
G5E927	Myc-associated zinc finger protein;Pur-1;Purine-binding transcription factor;ZF87;ZIF87;SAF-3	MAZ;MAZ	S302	1.34247	50.89	0.98321	17.03	1.51296	9.01	1.57363	20.39									0.880121	RHKISHSDEKPYQ		GO:0008270		0	n/a	0.98321	17.027	2	1.6749	19.301	2	1.5388	9.0129	2	0.73239	50.888	4	1.3757	13.566	4	1.6005	20.389	4
G5E934	Cancer susceptibility candidate gene 4 protein;Protein CASC4	CASC4;UNQ2573/PRO6308	S366	0.913053	14.96	0.65517	28.71	0.687142	38.23	0.853162	29.98	1.22745	46.05	0.90489	25.44	0.723604	8.92	0.721731	33.07	0.999988	FFDENESPVDPQH				0	0	0.65517	28.71	4	0.91294	26.887	4	1.0488	38.23	4	0.71756	14.959	4	0.99959	43.668	4	1.3022	29.983	4	0.90489	25.435	7	0.86742	11.381
G5E948	HPK/GCK-like kinase HGK;MAPK/ERK kinase kinase kinase 4;Mitogen-activated protein kinase kinase kinase kinase 4;Nck-interacting kinase;Putative uncharacterized protein MAP4K4	HGK;KIAA0687;MAP4K4;NIK;MAP4K4	S708			1.0742	43.38	1.0241	53.52											0.878401	VRTTSRSPVISRR		GO:0005524;GO:0004674;GO:0005083		n/a	n/a	1.0742	43.38	6	1.2873	62.798	6	0.95336	53.524	6
G5E948	HPK/GCK-like kinase HGK;MAPK/ERK kinase kinase kinase 4;Mitogen-activated protein kinase kinase kinase kinase 4;Nck-interacting kinase;Putative uncharacterized protein MAP4K4	HGK;KIAA0687;MAP4K4;NIK;MAP4K4	S936									1.07453		0.99938	2.89	1.23134	4.1	0.929603		0.537289	KHKSSSSFTPFID		GO:0005524;GO:0004674;GO:0005083		n/a	0																			0.99938	2.8911	2	1.1577	2.7416
G5E948	HPK/GCK-like kinase HGK;MAPK/ERK kinase kinase kinase 4;Mitogen-activated protein kinase kinase kinase kinase 4;Nck-interacting kinase;Putative uncharacterized protein MAP4K4	HGK;KIAA0687;MAP4K4;NIK;MAP4K4	T938																	0.22349	KSSSSFTPFIDPR		GO:0005524;GO:0004674;GO:0005083		n/a	n/a
G5E9E7	Tight junction protein 1;Tight junction protein ZO-1;Zona occludens protein 1;Zonula occludens protein 1	TJP1;ZO1	S1035	0.761942	13.18	0.55762		0.615836		0.483797	20.17	0.792152	3.56	0.75115	31.06	0.400138	47.63	0.787881	11.76	0.997741	PFDNQHSQDIDSR	GO:0005923			2	6	0.55762		1	0.83908		1	1.1044		1	0.73184	13.182	12	0.73611	35.929	12	0.86761	20.173	12	0.75115	31.064	4	0.49859	77.472
G5E9E7	Tight junction protein 1;Tight junction protein ZO-1;Zona occludens protein 1;Zonula occludens protein 1	TJP1;ZO1	S129	0.958759	30.54	0.67163	15.87	0.525148	31.19	0.529144	21.34	0.959841	26.26	0.86904	15.84	0.758029	18.94	0.75105	25.26	0.999653	PDPEPVSDNEEDS	GO:0005923			0	0	0.67163	15.869	31	0.5045	24.547	31	0.7819	31.191	31	0.70052	30.538	43	0.54473	20.714	43	0.78785	21.343	43	0.86904	15.84	47	0.75055	16.905
G5E9E7	Tight junction protein 1;Tight junction protein ZO-1;Zona occludens protein 1;Zonula occludens protein 1	TJP1;ZO1	S135	0.943537	44.25	0.65573	10.14	0.549784	19.89	0.528302	24.35	1.00688	37.43	0.89978	20.14	0.862907	22.99	0.730666	33.71	0.558297	SDNEEDSYDEEIH	GO:0005923			0	0	0.65573	10.135	8	0.55565	18.863	8	0.83843	19.885	8	0.69497	44.252	20	0.62044	29.483	20	0.80567	24.352	20	0.89978	20.136	34	0.86269	19.493
G5E9E7	Tight junction protein 1;Tight junction protein ZO-1;Zona occludens protein 1;Zonula occludens protein 1	TJP1;ZO1	S1501			0.75292		0.722924						0.58482	11.67	0.502039	14.52			0.528512	PKTIVKSHSIAQP	GO:0005923			n/a	n/a	0.75292		1	0.9173		1	0.96016		1										0.58482	11.669	5	0.60802	8.0338
G5E9E7	Tight junction protein 1;Tight junction protein ZO-1;Zona occludens protein 1;Zonula occludens protein 1	TJP1;ZO1	S333	1.06348	19.75	0.91935	18.52	1.04742	32.89	1.18385	31.92	0.892668	23.21	0.85739	19.22	0.976996	22.21	0.862792	32.75	0.998866	SDHSRHSPQQPSN	GO:0005923			0	0	0.91935	18.523	24	1.0431	30.477	24	1.1393	32.891	24	0.86447	19.747	23	1.0198	18.901	23	1.2877	31.916	23	0.85739	19.218	33	0.95892	17.223
G5E9E7	Tight junction protein 1;Tight junction protein ZO-1;Zona occludens protein 1;Zonula occludens protein 1	TJP1;ZO1	S621	1.0025	12.91	1.0408	18.09	1.00367	29.47	0.990779	38.24	0.815059	11.74	0.90765	19.77	1.15644	21.84	1.11478	17.17	0.999999	KRNIRKSREDISA	GO:0005923			0	0	1.0408	18.086	27	1.0212	16.026	27	0.96433	29.468	27	1.0382	12.914	15	1.1135	20.641	15	0.95194	38.236	15	0.90765	19.772	17	1.1338	11.629
G5E9E7	Tight junction protein 1;Tight junction protein ZO-1;Zona occludens protein 1;Zonula occludens protein 1	TJP1;ZO1	S903											1.1218	6.31	1.09756	16.05			0.60818	QTYPPYSPQAQPQ	GO:0005923			n/a	n/a																			1.1218	6.3104	3	0.92639	11.479
G5E9E7			S916	1.11251	20.93	1.0814	29.71	1.36938	37.12	1.31779	12.98	0.876277	15.72	0.97959	28.41	1.1039	55.22	0.976034	23.71	0.999998	PIHRIDSPGFKPA	GO:0005923			0	0	1.0814	29.707	18	1.2551	25.471	18	1.2663	37.119	18	0.97204	20.926	9	1.2668	13.415	9	1.2186	12.975	9	0.97959	28.41	15	1.1652	22.863
G5E9M5	Double-stranded RNA-binding protein 76;Interleukin enhancer-binding factor 3;M-phase phosphoprotein 4;Nuclear factor associated with dsRNA;Nuclear factor of activated T-cells 90 kDa;Translational control protein 80;Putative uncharacterized protein ILF3;cDNA FLJ58801, highly similar to Interleukin enhancer-binding factor 3	DRBF;ILF3;MPHOSPH4;NF90;ILF3	S382	1.00692	43.65	0.960165	25.015	0.837389	41.33	0.828762	43.345	1.02002	96.96	0.98961	62.185	0.794004	42.815	0.890659	34.56	0.979261	EDGEEKSPSKKKK	GO:0005622	GO:0003725		0	0	0.94479	38.028	71	0.96001	30.409	71	1.0292	33.977	71	0.95805	68.874	45	0.96685	83.928	45	0.92498	41.546	45	1.0992	52.174	51	0.99181	51.032
G5E9M5			S482	0.938818	18.54	0.89336	1.67	1.07087	26.32	0.419227	23.48	1.41651	15.05	1.3458	22.75	1.29505	24.91	1.15213	49.59	0.500591	SSKGEDSAEETEA	GO:0005622	GO:0003725		5	0	0.89336	1.6715	2	1.1678	63.299	2	1.1987	26.317	2	0.95158	18.539	2	0.50681	3.5156	2	0.46927	23.484	2	1.3458	22.753	3	1.1265	9.5671
G5E9M5	Double-stranded RNA-binding protein 76;Interleukin enhancer-binding factor 3;M-phase phosphoprotein 4;Nuclear factor associated with dsRNA;Nuclear factor of activated T-cells 90 kDa;Translational control protein 80;Putative uncharacterized protein ILF3;cDNA FLJ58801, highly similar to Interleukin enhancer-binding factor 3	DRBF;ILF3;MPHOSPH4;NF90;ILF3	S73																	0.988488	VPPEDDSKEGAGE	GO:0005622	GO:0003725		n/a	n/a
G5E9M5	Double-stranded RNA-binding protein 76;Interleukin enhancer-binding factor 3;M-phase phosphoprotein 4;Nuclear factor associated with dsRNA;Nuclear factor of activated T-cells 90 kDa;Translational control protein 80	DRBF;ILF3;MPHOSPH4;NF90	S793																	0.31062	SYSYSNSYNSPGG	GO:0005622	GO:0003725		n/a	n/a
G5E9M5	Double-stranded RNA-binding protein 76;Interleukin enhancer-binding factor 3;M-phase phosphoprotein 4;Nuclear factor associated with dsRNA;Nuclear factor of activated T-cells 90 kDa;Translational control protein 80;Putative uncharacterized protein ILF3;cDNA FLJ58801, highly similar to Interleukin enhancer-binding factor 3	DRBF;ILF3;MPHOSPH4;NF90;ILF3	T596	0.927418	17.22	0.94337	14.71	0.995727	24.91	0.804327	22.46	0.934039	4.35	0.96234	9.99	0.984955	23.59	0.949589	26.29	1	EKIFPDTPIAIDA	GO:0005622	GO:0003725		0	0
G5E9M7	Transcription cofactor vestigial-like protein 4	KIAA0121;VGLL4	S65			1.456	18.1	1.27741	4.95											1	PSKRKFSMEPGDE				n/a	n/a	1.456	18.104	2	1.1178	13.877	2	0.87734	4.9547	2
G5E9Y1	Amyloid beta A4 precursor protein-binding family B member 2;Protein Fe65-like 1	APBB2;FE65L;FE65L1	S123	1.12355	8.37	1.1331	6.23	1.19202	20.39	0.879172	15.54	0.747353	10.755	0.784085	7.42	1.23329	10.2	0.972461	8.64	0.998516	DPNKNISPTAVIN				0	0																			0.61033		1	1.1469
G5E9Y1			S334	0.775388	17.1	0.6694		0.471378		0.740156	29.23									0.671008	QGSRKGSISSVTP				1	n/a	0.6694		1	0.57655		1	0.70418		1	0.86331	17.1	8	0.91252	34.582	8	1.1057	29.225	8
G5EA03	LIM and calponin homology domains-containing protein 1;LIMCH1 protein	KIAA1102;LIMCH1;LIMCH1	S10	1.17884	38.94	1.2893	22.67	1.28675	22.41	0.684489	1.17			1.05	14.04	0.703133	13.57			0.999983	DTDDIESPKRSIR		GO:0008270		0	n/a	1.2893	22.669	5	1.1816	41.732	5	0.99802	22.405	5	1.0937	38.939	2	1.0075	10.347	2	0.5309	1.1727	2	1.05	14.036	4	0.84295	30.846
G5EA03	LIM and calponin homology domains-containing protein 1	KIAA1102;LIMCH1	S1103									0.900778	27.05	0.99554	7.79	0.591381	20.35	0.586901	15.75	0.999988	KVVKPKSPEPEAT		GO:0008270		n/a	0										0.98871		1	0.53572		1	0.57555		1	0.99554	7.7854	2	0.65023	25.811
G5EA03	LIM and calponin homology domains-containing protein 1;LIMCH1 protein	KIAA1102;LIMCH1;LIMCH1	S42	0.888242	6.45	0.92235	18.72	0.611204	18.96	0.588718	16.28			1.2819	7.36	0.625747	27.62			0.974287	RHGRDDSFDSIDS		GO:0008270		0	n/a	0.92235	18.723	2	0.89656	7.9457	2	0.66266	18.955	2	1.0384	6.4515	2	0.8338	24.747	2	0.63828	16.284	2	1.2819	7.3631	5	0.62911	19.967
G5EA03	LIM and calponin homology domains-containing protein 1;LIMCH1 protein	KIAA1102;LIMCH1;LIMCH1	S58	1.0277	17.055	1.1336	10.79	1.11378	21.395	1.04925	18.775	0.866215	13.52	1.1098	15.34	1.08807	6.08	0.799901	30.56	0.999944	RSRQTPSPDVVIR		GO:0008270		0	0	1.1328	10.119	19	0.97319	21.917	19	0.87743	29.256	19	1.133	20.031	15	0.79579	26.78	15	0.74228	28.285	15	0.91169	24.748	2	0.66683	22.158
G5EA03	LIM and calponin homology domains-containing protein 1;LIMCH1 protein	KIAA1102;LIMCH1;LIMCH1	S72	1.0216	17.89	1.0004	31.24	0.980312	14.87	0.830822	17.99	1.04336	22.03	1.1164	19.4	0.727011	14.15	0.610012	27.51	0.994605	SSDGRGSDSESDI		GO:0008270		0	0	1.0004	31.236	5	1.0641	29.113	5	0.97992	14.871	5	0.97925	17.894	9	0.91696	14.765	9	0.83049	17.988	9	1.1164	19.401	4	0.75036	13.303
G5EA03	LIM and calponin homology domains-containing protein 1;LIMCH1 protein	KIAA1102;LIMCH1;LIMCH1	T56	1.00327	20.03	1.1367	9.92	0.993044	28.48	0.84375	28.29	0.757411	15.48	1.0041	12.05	0.753316	13.12	0.516218	7.95	0.990273	GSRSRQTPSPDVV		GO:0008270		0	0	1.1367	9.9176	20	0.97909	21.621	20	0.87362	28.482	20	1.133	20.031	15	0.79579	26.78	15	0.74228	28.285	15	1.0041	12.05	14	0.74382	13.155
G8JLB6	Heterogeneous nuclear ribonucleoprotein H;Heterogeneous nuclear ribonucleoprotein H, N-terminally processed;FTP-3;Heterogeneous nuclear ribonucleoprotein H';Heterogeneous nuclear ribonucleoprotein H2	HNRNPH1;HNRPH;HNRPH1;FTP3;HNRNPH2;HNRPH2	S104	0.993722	21.205	0.922805	18.715	0.914228	41.625	0.959579	41.87	0.990336	19.035	0.943805	30.83	0.939964	26.13	0.990004	31.895	0.999279	KHTGPNSPDTAND		GO:0003676;GO:0000166		0	0	0.93189	25.298	71	0.94856	37.977	71	1.1012	36.196	71	0.92058	18.674	48	0.98444	20.596	48	1.0426	21.096	48	0.97692	42.248	67	0.92417	20.566
G8JLB6	Heterogeneous nuclear ribonucleoprotein H;Heterogeneous nuclear ribonucleoprotein H, N-terminally processed	HNRNPH1;HNRPH;HNRPH1	S63			0.9765	25.04	0.842339	50.61			1.08404	35.18	0.89341	0.82	0.633356	20.57	0.80205	7.55	1	AFVEIESEDEVKI		GO:0003676;GO:0000166		n/a	0	0.9765	25.042	7	0.68919	30.004	7	0.86261	50.612	7										0.89341	0.81679	2	0.89854	16.265
G8JLC6	C219-reactive peptide;D320;Melanoma inhibitory activity protein 3;Transport and Golgi organization protein 1	KIAA0268;MIA3;UNQ6077/PRO20088	S1678	1.21565	4.96	0.69922		0.769352		0.75271	26.48	1.05281	12.04	0.72929	25.89	0.679939	69.75	0.607025	54.89	0.91212	VSGGECSPPITVE				0	0	0.69922		1	0.92056		1	1.1003		1	0.57518	4.9595	2	0.70079	1.5642	2	1.0765	26.475	2	0.72929	25.892	7	0.6726	22.304
G8JLC6	C219-reactive peptide;D320;Melanoma inhibitory activity protein 3;Transport and Golgi organization protein 1	KIAA0268;MIA3;UNQ6077/PRO20088	S1691	1.21744	44.96	0.72524	7.6	0.840191	5.47	0.871884	18.66	1.24041	62.99	0.78859	30.02	0.676744	47.7	0.619327	39.14	0.667735	PPVRPISATINRR				0	0	0.72524	7.6016	4	0.91628	34.686	4	1.1585	5.4697	4	0.59571	44.958	5	0.89607	16.165	5	1.2022	18.664	5	0.78859	30.019	16	0.65132	22.167
G8JLC6	C219-reactive peptide;D320;Melanoma inhibitory activity protein 3;Transport and Golgi organization protein 1	KIAA0268;MIA3;UNQ6077/PRO20088	S1741																	0.657556	TMMNSSSRGSSPT				n/a	n/a
G8JLC6	C219-reactive peptide;D320;Melanoma inhibitory activity protein 3;Transport and Golgi organization protein 1	KIAA0268;MIA3;UNQ6077/PRO20088	S1906			0.81553		0.5035												0.99975	SQAIKQSP_____				n/a	n/a	0.81553		1	0.47105		1	0.61739		1
G8JLC6	C219-reactive peptide;D320;Melanoma inhibitory activity protein 3;Transport and Golgi organization protein 1	KIAA0268;MIA3;UNQ6077/PRO20088	T1693																	0.496291	VRPISATINRRDM				n/a	n/a
G8JLH5	Large neutral amino acids transporter small subunit 4;L-type amino acid transporter 4;Solute carrier family 43 member 2;cDNA FLJ55865, highly similar to Homo sapiens solute carrier family 43, member 2 (SLC43A2), mRNA	LAT4;PP7664;SLC43A2	S297									1.17433	9.51	0.89031		1.01326		1.04611	8.92	0.984841	GHKICISTVDIEV	GO:0016021		GO:0055085	n/a	0																			0.89031		1	1.2245
G8JLI3	SAPS domain family member 3;Serine/threonine-protein phosphatase 6 regulatory subunit 3;Sporulation-induced transcript 4-associated protein SAPL	C11orf23;KIAA1558;PP6R3;SAPL;SAPS3	S617	1.3333	29.43	1.3705	9.19	0.877456	20.565	1.30752	19.915	0.848237	12.91	1.23885	14.035	1.12363	15.365	1.01441	20.78	1	QFDDGGSDEEDIW				0	0	1.1559	12.333	7	0.69793	8.6311	7	0.6925	12.183	7	1.0005	4.0945	2	1.1341	64.686	2	1.1269	0.36471	2	1.0217	11.119	6	1.1086	7.666
G8JLL9	Myosin heavy chain 14;Myosin heavy chain, non-muscle IIc;Myosin-14;Non-muscle myosin heavy chain IIc	FP17425;KIAA2034;MYH14	S2010																	0.999997	IEEGVASDEEAEE	GO:0016459	GO:0003779;GO:0005524;GO:0003774		n/a	n/a
H0Y3K7	Putative uncharacterized protein ABLIM1;Actin binding LIM protein 1;Actin-binding double zinc finger protein;Actin-binding LIM protein 1;Actin-binding LIM protein family member 1;LIMAB1;Limatin;Putative uncharacterized protein ABLIM1;Putative uncharacterized protein ABLIM1;Putative uncharacterized protein ABLIM1;Actin binding LIM protein 1;Actin binding LIM protein 1	ABLIM1;ABLIM1;RP11-317F20.1-005;ABLIM;ABLIM1;KIAA0059;LIMAB1;ABLIM1;ABLIM1;ABLIM1;ABLIM1;RP11-317F20.1-003;ABLIM1;RP11-317F20.1-008	S359																	0.33329	DRMIHRSTSQGSI		GO:0003779;GO:0008270	GO:0007010	n/a	n/a
H0Y3K7	Putative uncharacterized protein ABLIM1;Actin binding LIM protein 1;Actin-binding double zinc finger protein;Actin-binding LIM protein 1;Actin-binding LIM protein family member 1;LIMAB1;Limatin;Putative uncharacterized protein ABLIM1;Putative uncharacterized protein ABLIM1;Putative uncharacterized protein ABLIM1;Actin binding LIM protein 1;Actin binding LIM protein 1	ABLIM1;ABLIM1;RP11-317F20.1-005;ABLIM;ABLIM1;KIAA0059;LIMAB1;ABLIM1;ABLIM1;ABLIM1;ABLIM1;RP11-317F20.1-003;ABLIM1;RP11-317F20.1-008	S361																	0.33329	MIHRSTSQGSINS		GO:0003779;GO:0008270	GO:0007010	n/a	n/a
H0Y3K7			S382	0.995391	28.88	1.0582	10.35	1.02821	7.87	0.999703	14.18			0.98962	21.51	0.921692	9.6			0.999999	TPTTSRSPQHFHR		GO:0003779;GO:0008270	GO:0007010	0	n/a	1.0582	10.35	2	1.0376	4.6359	2	0.97166	7.871	2	1.0631	28.881	8	1.0537	19.345	8	0.94472	14.179	8	0.98962	21.508	3	0.8999	7.4205
H0Y3K7	Putative uncharacterized protein ABLIM1;Actin binding LIM protein 1;Actin-binding double zinc finger protein;Actin-binding LIM protein 1;Actin-binding LIM protein family member 1;LIMAB1;Limatin;Putative uncharacterized protein ABLIM1;Putative uncharacterized protein ABLIM1;Putative uncharacterized protein ABLIM1;Actin binding LIM protein 1;Actin binding LIM protein 1	ABLIM1;ABLIM1;RP11-317F20.1-005;ABLIM;ABLIM1;KIAA0059;LIMAB1;ABLIM1;ABLIM1;ABLIM1;ABLIM1;RP11-317F20.1-003;ABLIM1;RP11-317F20.1-008	S460	0.980694	15.07	1.1734	31.77	0.991629	29.23	1.08108	23.72			1.1165		0.621198				0.5	PDMKRRSSGREED		GO:0003779;GO:0008270	GO:0007010	0	n/a	1.1734	31.77	4	1.199	16.596	4	0.84509	29.23	4	1.1965	15.071	9	1.0125	36.489	9	0.92132	23.715	9	1.1165		1	0.9898
H0Y3K7	Putative uncharacterized protein ABLIM1;Actin binding LIM protein 1;Actin-binding double zinc finger protein;Actin-binding LIM protein 1;Actin-binding LIM protein family member 1;LIMAB1;Limatin;Putative uncharacterized protein ABLIM1;Putative uncharacterized protein ABLIM1;Putative uncharacterized protein ABLIM1;Actin binding LIM protein 1;Actin binding LIM protein 1	ABLIM1;ABLIM1;RP11-317F20.1-005;ABLIM;ABLIM1;KIAA0059;LIMAB1;ABLIM1;ABLIM1;ABLIM1;ABLIM1;RP11-317F20.1-003;ABLIM1;RP11-317F20.1-008	S461	0.931384	31.36	1.1945	11.62	1.09245	6.17	0.996942	20.23	1.09846		1.2372	33.92	1.11322	23.89	1.22397		0.979971	DMKRRSSGREEDD		GO:0003779;GO:0008270	GO:0007010	0	0	1.1945	11.621	11	1.1034	21.101	11	0.91457	6.1682	11	1.2825	31.355	17	1.0949	26.733	17	0.83461	20.225	17	1.2372	33.921	11	1.1945	18.778
H0Y3K7	Putative uncharacterized protein ABLIM1;Actin binding LIM protein 1;Actin-binding double zinc finger protein;Actin-binding LIM protein 1;Actin-binding LIM protein family member 1;LIMAB1;Limatin;Putative uncharacterized protein ABLIM1;Putative uncharacterized protein ABLIM1;Putative uncharacterized protein ABLIM1;Actin binding LIM protein 1;Actin binding LIM protein 1	ABLIM1;ABLIM1;RP11-317F20.1-005;ABLIM;ABLIM1;KIAA0059;LIMAB1;ABLIM1;ABLIM1;ABLIM1;ABLIM1;RP11-317F20.1-003;ABLIM1;RP11-317F20.1-008	T360																	0.33329	RMIHRSTSQGSIN		GO:0003779;GO:0008270	GO:0007010	n/a	n/a
H0Y3Y8	Receptor expression-enhancing protein 3	C10orf74;REEP3	T159									1.2434	16.09	1.2669		1.34697		1.54182	3.55	0.366431	FSMHDITTIQGDE				n/a	0																			1.2669		1	1.1366
H0Y3Y8	Receptor expression-enhancing protein 3	C10orf74;REEP3	T160																	0.366431	SMHDITTIQGDEP				n/a	n/a
H0Y3Y8	Receptor expression-enhancing protein 3	C10orf74;REEP3	T203	0.840572	22.2	0.91471	15.88	0.643681	22.21	0.981209	26.94	0.884013	24.98	0.75561	21.08	0.742787	9.61	0.793768	18.58	0.998796	KDGDEKTDEEAEG				0	0	0.91471	15.88	4	0.76446	21.96	4	0.7037	22.206	4	1.0882	22.199	3	0.92169	29.63	3	1.0727	26.94	3	0.75561	21.075	3	0.741	21.91
H0Y459			S13	0.507599	11.07	0.68201	58.73	0.879111	61.67	0.488838	20.09									1	PCGTSKSPNREWE				3	n/a	0.68201	58.734	2	0.83686	13.468	2	1.289	61.673	2	1.3436	11.069	4	1.2867	2.0815	4	0.71676	20.091	4
H0Y459			S50	0.844997		0.8416		1.02414		1.14441				1.1792	15.69	1.05018	18.31			0.592302	TAARSASPCRISP				0	n/a	0.8416		1	0.94707		1	1.2169		1	0.99598		1	1.2319		1	1.3598		1	1.1792	15.691	2	1.0864	3.1387
H0Y459			S55	0.844997		0.8416		1.02414		1.14441				1.1792	15.69	1.05018	18.31			1	ASPCRISPREVSK				0	n/a	0.8416		1	0.94707		1	1.2169		1	0.99598		1	1.2319		1	1.3598		1	1.1792	15.691	2	1.0864	3.1387
H0Y4E8	Salt-inducible kinase 3;Serine/threonine-protein kinase QSK;Serine/threonine-protein kinase SIK3;KIAA0999 protein;KIAA0999 protein	KIAA0999;L19;QSK;SIK3;KIAA0999;KIAA0999	S545	0.782884	11.1	0.89194	13.23	0.589233	39.5	0.67849	27.18	0.715275		0.84009	23.01	0.952914	13.76	0.795196		1	PIGRRASDGGANI		GO:0005524;GO:0004674		0	0	0.89194	13.23	3	0.6265	29.914	3	0.66062	39.496	3	1.1393	11.1	4	1.1162	17.185	4	0.76069	27.175	4	0.84009	23.007	3	1.0826	34.166
H0Y8C2	60S ribosomal protein L22-like 1;Putative uncharacterized protein RPL22L1	RPL22L1;RPL22L1	S138																	0.988912	SQDEDESESED__	GO:0005840	GO:0003735	GO:0006412	n/a	n/a
H0YDC1			S10																	0.973142	WAQIHPSPQNTPQ				n/a	n/a										0.78233	22.426	2	0.83346	12.442	2	1.0404	27.982	2
H0YEX2			S190	0.991308	30.31	0.82339	16.25	1.11446	18.91	1.25345	17.77	1.15861	18.72	1.1568	16.08	1.56191	18.04	1.45687	13.11	0.999999	SDTPIGSPIEPGQ		GO:0005488		0	0	0.82339	16.245	9	1.1242	30.154	9	1.3535	18.913	9	0.83061	30.309	13	1.2631	20.94	13	1.5223	17.769	13	1.1568	16.075	13	1.4733	10.303
H0YEX2			T186	0.955153	32.32	0.79336	16.51	1.10007	20.22	1.20773	18.7	1.16276	20.59	1.1568	19.26	1.44577	19.53	1.43732	11.24	0.985736	VKRKSDTPIGSPI		GO:0005488		0	0	0.79336	16.511	8	1.1546	32.131	8	1.3866	20.218	8	0.83061	32.322	11	1.2341	22.299	11	1.5223	18.697	11	1.1568	19.259	9	1.4011	12.099
H0YFH7	cDNA FLJ56152, highly similar to Rho guanine nucleotide exchange factor 7;Rho guanine nucleotide exchange factor (GEF) 7;Beta-Pix;COOL-1;p85;PAK-interacting exchange factor beta;Rho guanine nucleotide exchange factor 7;Alpha-Pix;COOL-2;PAK-interacting exchange factor alpha;Rac/Cdc42 guanine nucleotide exchange factor 6;Rho guanine nucleotide exchange factor 6;cDNA FLJ50776, highly similar to Rho …	ARHGEF7;RP11-494P5.1-001;ARHGEF7;COOL1;KIAA0142;Nbla10314;P85SPR;PAK3BP;PIXB;ARHGEF6;COOL2;KIAA0006;PIXA	S495	1.24166	27.055	1.3567	9.06	1.38945	10.33	1.52595	60.79	0.877838	11.135	1.1968	31.615	1.22345	56.82	1.23558	10.67	1	SASPRMSGFIYQG	GO:0005622	GO:0005543;GO:0005089	GO:0035556;GO:0035023	0	0	1.075	9.0628	6	1.1256	10.884	6	1.0934	10.329	6	1.093	25.634	5	1.1671	14.529	5	1.1012	111.65	5	1.1928	62.935	7	1.5022	13.102
H0YGG4			S7			0.80065	15.84	0.82547	8.16											0.999945	URGRIGSPGAPQQ			GO:0044237	n/a	n/a	0.80065	15.838	5	0.92939	22.317	5	1.031	8.1628	5
H0YJ60	33 kDa housekeeping protein;Peroxin-19;Peroxisomal biogenesis factor 19;Peroxisomal farnesylated protein;Peroxisomal biogenesis factor 19;cDNA FLJ52066, highly similar to Peroxisomal biogenesis factor 19;Peroxisomal biogenesis factor 19, isoform CRA_a	HK33;OK/SW-cl.22;PEX19;PXF;PEX19;RP11-179G5.2-003;hCG_39731;PEX19	S17			1.1554		0.948063												0.57589	TDIQNSSMSEEEI	GO:0005777			n/a	n/a	1.1554		1	0.82411		1	0.82055		1
H0YL70	Enhancer of split groucho-like protein 3;Transducin-like enhancer protein 3;TLE3 protein	KIAA1547;TLE3	S213			0.92285		0.47058				0.827361	22.55	0.963255	28.79	0.912135	27.41	0.952948	16.17	0.99046	SANNSVSPSESIR	GO:0005634		GO:0006355	n/a	0																			1.0271	28.789	5	1.1149	27.61
H0YL70	Enhancer of split groucho-like protein 3;Transducin-like enhancer protein 3;TLE3 protein	KIAA1547;TLE3	S227	0.457255	10.08	0.53101	128.54	0.367156	1.56	0.573491	3.81			0.82461	14.86	1.42097	3.42			1	SEKHRGSADYSME	GO:0005634		GO:0006355	7	n/a	0.53101	128.54	2	0.81336	25.453	2	0.69143	1.5647	2	1.1613	10.075	2	1.2259	12.405	2	1.08	3.8067	2	0.82461	14.864	2	1.3433	31.364
H0YL70	Enhancer of split groucho-like protein 3;Transducin-like enhancer protein 3;TLE3 protein	KIAA1547;TLE3	S250	1.03899	7.29	1.05		1.02539		0.849786	6.56									0.901044	SISRYDSDGDKSD	GO:0005634		GO:0006355	0	n/a	1.05		1	0.85516		1	0.97656		1	1.0106	7.2935	4	0.6997	14.355	4	0.80932	6.5576	4
H0YL70	Enhancer of split groucho-like protein 3;Transducin-like enhancer protein 3;TLE3 protein	KIAA1547;TLE3	S273																	1	PATPRVSPAHSPP	GO:0005634		GO:0006355	n/a	n/a										0.86385	20.107	21	0.83017	24.646	21	0.95661	33.819	21
H0YL70	Enhancer of split groucho-like protein 3;Transducin-like enhancer protein 3;TLE3 protein	KIAA1547;TLE3	S277																	1	RVSPAHSPPENGI	GO:0005634		GO:0006355	n/a	n/a										0.86385	20.107	21	0.83017	24.646	21	0.95661	33.819	21
H0YL70	Enhancer of split groucho-like protein 3;Transducin-like enhancer protein 3;TLE3 protein	KIAA1547;TLE3	S296																	0.470356	KKDAPTSPASVAS	GO:0005634		GO:0006355	n/a	n/a
H0YL70	Enhancer of split groucho-like protein 3;Transducin-like enhancer protein 3;TLE3 protein	KIAA1547;TLE3	T295																	0.470356	IKKDAPTSPASVA	GO:0005634		GO:0006355	n/a	n/a
H0YL70	Enhancer of split groucho-like protein 3;Transducin-like enhancer protein 3;TLE3 protein	KIAA1547;TLE3	T338									0.790615	9.155	0.820955	54.325	1.12984	12.08	0.84184	23.255	0.999435	PRNDAPTPGTSTT	GO:0005634		GO:0006355	n/a	0																			0.71191	95.167	3	0.90691	22.784
H0YL70	Enhancer of split groucho-like protein 3;Transducin-like enhancer protein 3;TLE3 protein	KIAA1547;TLE3	Y248																	0.808943	KDSISRYDSDGDK	GO:0005634		GO:0006355	n/a	n/a										1.0106	7.2935	4	0.6997	14.355	4	0.80932	6.5576	4
H0YLN1	mRNA-decapping enzyme 1A;Smad4-interacting transcriptional co-activator;Transcription factor SMIF	DCP1A;SMIF	S142			0.68264		0.613373						1.0938	10.16	1.13897	22.33			0.501884	AARDKQSPSQANG				n/a	n/a	0.68264		1	0.38573		1	0.89853		1										1.0938	10.161	3	1.0669	5.6665
H0YLN1	mRNA-decapping enzyme 1A;Smad4-interacting transcriptional co-activator;Transcription factor SMIF	DCP1A;SMIF	S144			0.89192		0.277111						1.0484	16.93	1.05396	16.02			0.49739	RDKQSPSQANGCS				n/a	n/a	0.89192		1	0.4877		1	0.31069		1										1.0484	16.925	5	1.0015	19.337
H0YLN1	mRNA-decapping enzyme 1A;Smad4-interacting transcriptional co-activator;Transcription factor SMIF	DCP1A;SMIF	S315											1.0081		0.961334				0.926627	TYTIPISPVISPT				n/a	n/a										0.69361	2.7526	3	0.85462	7.5764	3	1.2088	4.6822	3	1.0081		1	0.96436
H0YLN1	mRNA-decapping enzyme 1A;Smad4-interacting transcriptional co-activator;Transcription factor SMIF	DCP1A;SMIF	S319											1.0081		0.961334				0.864986	PISPVISPTIPAE				n/a	n/a										0.69361	2.7526	3	0.85462	7.5764	3	1.2088	4.6822	3	1.0081		1	0.96436
H0YLN1	mRNA-decapping enzyme 1A;Smad4-interacting transcriptional co-activator;Transcription factor SMIF	DCP1A;SMIF	S353	1.05609		0.57525		0.437857		0.0829625		0.746001	20.72	0.73317	19.12	0.784199	6.77	0.668944	12.16	0.999859	TTPRQRSPIINQP				5	0	0.57525		1	0.59255		1	0.76116		1	0.5447		1	0.21281		1	0.14422		1	0.73317	19.121	7	0.945	12.651
H0YLN1	mRNA-decapping enzyme 1A;Smad4-interacting transcriptional co-activator;Transcription factor SMIF	DCP1A;SMIF	T401	1.07283	29.21	0.88824		0.686379		1.19708	29.41	0.956906	11.89	1.1924	18.92	1.39225	17.71	1.20742	73.69	1	IQKIRITPQHDQI				0	0	0.88824		1	0.95956		1	0.77274		1	0.82794	29.211	9	1.0815	21.09	9	1.3477	29.409	9	1.1924	18.92	7	1.0371	33.756
H0YLN1	mRNA-decapping enzyme 1A;Smad4-interacting transcriptional co-activator;Transcription factor SMIF	DCP1A;SMIF	T528	0.922307	14.11	0.77079	48.7	1.01875	22.05	0.811565	15.64	0.948358	25.4	0.98449	12.23	1.06837	13.46	0.886523	26.49	0.940939	SSPSPITIGTPES				0	0	0.77079	48.703	6	1.0834	51.424	6	1.3217	22.049	6	0.83572	14.105	7	0.95545	12.089	7	1.0529	15.641	7	0.98449	12.234	7	0.99489	11.264
H0YLP2	DNA-binding protein RFX7;Regulatory factor X 7;Regulatory factor X domain-containing protein 2;Putative uncharacterized protein RFX7	RFX7;RFXDC2;RFX7	S357																	0.862657	TTVIFTSSPIKTA		GO:0003677	GO:0006355	n/a	n/a										1.0518		1	2.2734		1	1.7189		1
H0YNJ6	GMP reductase;GMP reductase 2;Guanosine 5'-monophosphate oxidoreductase 2;GMP reductase	GMPR2;GMPR2;GMPR2;hCG_40198	S46	0.971382	28.46	1.0149	13.6	0.681982	36.94	1.11426	26.83	0.206931		0.27526	64.47	0.307851	37.29	0.291941		0.997934	STIKSRSEVDITR		GO:0003920;GO:0046872	GO:0009117	0	7	1.0149	13.603	7	0.73341	35.701	7	0.67197	36.942	7	1.0448	28.462	7	1.1331	28.428	7	1.0979	26.825	7	0.27526	64.471	3	0.56929	34.566
O00151	C-terminal LIM domain protein 1;Elfin;LIM domain protein CLP-36;PDZ and LIM domain protein 1	CLIM1;CLP36;PDLIM1	S90	1.04423	15.45	0.9501	40.7	1.26962	26.31	1.81621	8.5	0.783812	11.95	0.85992	14.88	1.32531	13.46	0.955629	20.08	0.999695	SEHKVWSPIVTEE	GO:0005737;GO:0005856	GO:0008270	GO:0006979	0	0
O00161	Synaptosomal-associated protein 23;Vesicle-membrane fusion protein SNAP-23	SNAP23	S110									2.02658	17.71	1.0764	31.29	0.896856	23.57	0.873499	5.42	0.999056	GDGGENSPCNVVS	GO:0042582;GO:0030054;GO:0005794;GO:0005634;GO:0005886;GO:0001950;GO:0042581;GO:0045202;GO:0019717	GO:0005515	GO:0006944;GO:0006892;GO:0015031;GO:0006903	n/a	8										0.55916		1	0.95672		1	1.0992		1	1.0764	31.294	5	0.96868	8.7832
O00192	Armadillo repeat protein deleted in velo-cardio-facial syndrome;Putative uncharacterized protein ARVCF	ARVCF;ARVCF	S267																	0.999998	IEDDTRSIAADDE		GO:0005515	GO:0007155;GO:0007275	n/a	n/a
O00192	Armadillo repeat protein deleted in velo-cardio-facial syndrome;Putative uncharacterized protein ARVCF	ARVCF;ARVCF	T642	0.946229	13.79	0.98474	12.38	1.18996	4.57	1.09651	12.87	1.10806	16.38	1.1546	11.27	1.36578	19.61	1.23715	9.31	1	MDRNFDTIDIPKR		GO:0005515	GO:0007155;GO:0007275	0	0	0.98474	12.384	5	1.2458	7.427	5	1.2084	4.5663	5	1.0407	13.785	6	1.1107	15.287	6	1.1135	12.873	6	1.1546	11.27	10	1.2613	16.445
O00193	Small acidic protein	C11orf58;SMAP	S17	1.08224	16.26	1.1353	14.58	0.810653	39.69	0.921294	20.03	0.57763	12.91	0.992195	10.93	1.00526	19.985	0.682104	16.15	0.865998	GVKRSASPDDDIG				0	0	0.86571	27.445	33	0.57695	33.754	33	0.68393	63.832	33	0.92216	16.255	8	0.64659	10.087	8	0.67657	20.03	8	0.80879	12.664	13	0.96919	7.8717
O00203	Adapter-related protein complex 3 subunit beta-1;Adaptor protein complex AP-3 subunit beta-1;AP-3 complex subunit beta-1;Beta-3A-adaptin;Clathrin assembly protein complex 3 beta-1 large chain	ADTB3A;AP3B1	S276	1.1855	18.205	1.15085	27.52	0.966294	25.54	1.25877	26.93	0.674844	11.075	0.94883	18.595	1.14315	21.905	0.907262	16.365	1	GKNFYESDDDQKE	GO:0030665;GO:0005794;GO:0030117	GO:0019903;GO:0008565	GO:0006897;GO:0032438	0	0	1.0114	19.317	68	0.80461	24.724	68	0.81514	30.657	68	1.057	19.698	65	0.96867	24.348	65	0.93605	27.177	65	0.85116	25.025	89	1.0605	20.852
O00203	Adapter-related protein complex 3 subunit beta-1;Adaptor protein complex AP-3 subunit beta-1;AP-3 complex subunit beta-1;Beta-3A-adaptin;Clathrin assembly protein complex 3 beta-1 large chain	ADTB3A;AP3B1	S750	1.30363		1.0638	7.68	1.02726	11.09	0.835051		0.448092	20.24	0.56249	21.14	0.762793	20.37	0.556578	14.6	1	SKAKGKSDSEDGE	GO:0030665;GO:0005794;GO:0030117	GO:0019903;GO:0008565	GO:0006897;GO:0032438	0	7	1.0638	7.6802	2	0.94877	18.054	2	0.96565	11.089	2	0.81603		1	0.62984		1	0.78497		1	0.56249	21.143	17	0.76724	17.073
O00204	Alcohol sulfotransferase;Hydroxysteroid sulfotransferase 2;Sulfotransferase family cytosolic 2B member 1	HSST2;SULT2B1	S347	0.676243	0.47	0.41595	25.99	0.375337	29	0.481837	10.38									0.56728	REPRPNSSPSPSP	GO:0005829	GO:0004027;GO:0005515;GO:0050294	GO:0050427;GO:0008202;GO:0006805	1	n/a	0.41595	25.987	2	0.39653	46.493	2	0.90236	29.002	2	0.61509	0.47326	2	0.73532	4.7549	2	1.1584	10.378	2
O00204	Alcohol sulfotransferase;Hydroxysteroid sulfotransferase 2;Sulfotransferase family cytosolic 2B member 1	HSST2;SULT2B1	S348																	0.456955	EPRPNSSPSPSPG	GO:0005829	GO:0004027;GO:0005515;GO:0050294	GO:0050427;GO:0008202;GO:0006805	n/a	n/a
O00220	Death receptor 4;TNF-related apoptosis-inducing ligand receptor 1;Tumor necrosis factor receptor superfamily member 10A	APO2;DR4;TNFRSF10A;TRAILR1	S463																	0.982227	IEDGTGSAVSIE_	GO:0016021	GO:0005035;GO:0045569;GO:0008134	GO:0006919;GO:0007250;GO:0071260;GO:0097191;GO:0008625	n/a	n/a
O00220	Death receptor 4;TNF-related apoptosis-inducing ligand receptor 1;Tumor necrosis factor receptor superfamily member 10A	APO2;DR4;TNFRSF10A;TRAILR1	S466																	1	GTGSAVSIE____	GO:0016021	GO:0005035;GO:0045569;GO:0008134	GO:0006919;GO:0007250;GO:0071260;GO:0097191;GO:0008625	n/a	n/a
O00255	Menin	MEN1;SCG2	S492	1.23576	33.26	1.0216	34.77	1.16493	52.97	0.933824	25.77									1	RGPRRESKPEEPP	GO:0000785;GO:0032154;GO:0005829;GO:0035097;GO:0016363;GO:0005625	GO:0003690;GO:0000400;GO:0030674;GO:0047485;GO:0070412;GO:0044212;GO:0000403	GO:0006281;GO:0034968;GO:0000165;GO:0008285;GO:0045736;GO:0046329;GO:0045668;GO:0001933;GO:0043433;GO:0051974;GO:0000122;GO:0002076;GO:0032092;GO:0030511;GO:0010332;GO:0009411;GO:0006351	0	n/a	1.0216	34.766	8	1.3078	34.939	8	1.1403	52.973	8	0.8267	33.259	8	0.85375	37.022	8	0.91408	25.765	8
O00257	Chromobox protein homolog 4;E3 SUMO-protein ligase CBX4;Polycomb 2 homolog	CBX4	S293			1.2407	30.12	1.27407	48.07			1.06163		1.3575	67.56	0.514832	69.03	4.19237		0.58787	GEARSPSHKKRAA	GO:0005794;GO:0035102	GO:0019899;GO:0005515;GO:0003714	GO:0006916;GO:0016568;GO:0000122;GO:0006351	n/a	6	1.2407	30.118	5	1.2091	66.518	5	1.0269	48.068	5										1.3575	67.56	5	1.2187	53.313
O00264	Membrane-associated progesterone receptor component 1;cDNA FLJ50115, moderately similar to Membrane-associated progesterone receptor component 1;Progesterone receptor membrane component 1, isoform CRA_c	HPR6.6;PGRMC;PGRMC1;hCG_23188;PGRMC1	S181	0.945412	15.98	1.00252	15.245	1.18968	25.665	0.987923	21.045	1.05444	17.23	1.02852	16.56	0.976734	20.74	1.14369	22.15	0.999823	EEPTVYSDEEEPK	GO:0009986;GO:0005789;GO:0016021;GO:0005792;GO:0005730	GO:0020037;GO:0004872;GO:0005496		0	0	1.0312	17.356	230	1.0428	24.7	230	1.1158	25.715	230	1.0002	15.81	60	0.98289	14.561	60	0.97312	14.602	60	1.0905	17.006	150	0.94895	16.62
O00264	Membrane-associated progesterone receptor component 1;cDNA FLJ50115, moderately similar to Membrane-associated progesterone receptor component 1;Progesterone receptor membrane component 1, isoform CRA_c	HPR6.6;PGRMC;PGRMC1;hCG_23188;PGRMC1	S57	0.82666	13.235	0.673385	19.615	0.669402	21.61	0.532489	25.565	1.07373	10.07	0.77849	14.78	0.729842	21.425	0.801152	22.87	0.999862	PAASGDSDDDEPP	GO:0009986;GO:0005789;GO:0016021;GO:0005792;GO:0005730	GO:0020037;GO:0004872;GO:0005496		0	0	0.62909	33.427	14	0.57043	58.858	14	0.82177	25.458	14	0.71781	20.856	9	0.45163	45.692	9	0.54753	32.978	9	0.82764	17.898	11	0.68501	26.692
O00267	DRB sensitivity-inducing factor 160 kDa subunit;DRB sensitivity-inducing factor large subunit;Tat-cotransactivator 1 protein;Transcription elongation factor SPT5;cDNA FLJ54005, highly similar to Transcription elongation factor SPT5	SPT5;SPT5H;SUPT5H	S666	0.993338	8.38	1.0586	15.26	1.07088	11.01	0.82141	23.13	1.01305	14.055	0.9407	10.46	0.717114	16.77	0.906689	14.365	1	GGFAPMSPRISSP	GO:0005654	GO:0019899;GO:0046982	GO:0007049;GO:0006338;GO:0006370;GO:0032785;GO:0000122;GO:0032968;GO:0045944;GO:0050434;GO:0010033;GO:0045090;GO:0006368	0	0																			1.1301		1	0.7926
O00418	Calcium/calmodulin-dependent eukaryotic elongation factor 2 kinase;Eukaroytic elongation factor 2 kinase	EEF2K	S470	0.756732	33.12	1.0567	22.57	0.562133	18.24	0.800841	19.3	0.920972		0.8907	13.73	0.634419	13.82	0.417631		0.999757	SNRKYESDEDSIG	GO:0005829	GO:0005524;GO:0005509;GO:0005516;GO:0004686;GO:0008135	GO:0008286;GO:0046777;GO:0006414	0	5	1.0567	22.569	5	0.74311	15.973	5	0.53197	18.238	5	1.3964	33.12	2	0.98201	22.619	2	0.75787	19.302	2	0.8907	13.731	2	0.89661	20.547
O00418	Calcium/calmodulin-dependent eukaryotic elongation factor 2 kinase;Eukaroytic elongation factor 2 kinase	EEF2K	S474	0.756732	33.12	1.0567	22.57	0.562133	18.24	0.800841	19.3	0.920972		0.8907	13.73	0.634419	13.82	0.417631		0.991563	YESDEDSIGSSGR	GO:0005829	GO:0005524;GO:0005509;GO:0005516;GO:0004686;GO:0008135	GO:0008286;GO:0046777;GO:0006414	0	5	1.0567	22.569	5	0.74311	15.973	5	0.53197	18.238	5	1.3964	33.12	2	0.98201	22.619	2	0.75787	19.302	2	0.8907	13.731	2	0.89661	20.547
O00505	Importin alpha Q2;Importin subunit alpha-3;Karyopherin subunit alpha-3;SRP1-gamma	KPNA3;QIP2	S60	1.68441		1.20535	25.82	0.798032	41.61	1.99726		1.05018	13.06	1.03576	21.52	1.44714	14.68	0.880702	14.64	0.999996	EESIEDSDVDADF	GO:0005829;GO:0005643;GO:0005654	GO:0008139;GO:0008565	GO:0019221;GO:0044419;GO:0006607;GO:0006461	0	0	0.9457	21.132	3	0.67404	24.595	3	0.85782	20.736	3										0.74441	21.515	2	0.90387	18.962
O00515	Ladinin-1;Linear IgA disease antigen	LAD;LAD1	S123	1.06385	19.59	0.94843	21.99	1.63595	18.59	1.26966	23.25	0.897703	25.22	0.98496	17.49	1.24962	17.07	1.24302	12.95	0.963886	EGRNSISPVQATQ	GO:0015629;GO:0005604	GO:0005198		0	0	0.94843	21.99	49	1.5688	20.628	49	1.7249	18.586	49	0.89151	19.585	27	1.1901	16.178	28	1.3387	23.247	28	0.98496	17.491	30	1.1751	15.207
O00515	Ladinin-1;Linear IgA disease antigen	LAD;LAD1	S177	0.998005	18.035	0.90547	10.03	1.13197	10.06	1.13528	18.435	0.879572	10.695	0.86184	14.415	1.04464	9.065	1.08488	12.695	1	KGVPEKSPVIEKS	GO:0015629;GO:0005604	GO:0005198		0	0	0.97048	11.451	46	1.2485	16.459	46	1.4576	10.511	46	0.89768	12.187	17	1.1766	16.134	17	1.3485	21.53	17	0.89152	20.427	20	1.1037	9.2014
O00515	Ladinin-1;Linear IgA disease antigen	LAD;LAD1	S272	1.07129	48.41	0.7593	75.4	0.75807	56.32	0.873438	43.405	0.887907	59.355	0.86202	24.17	1.01977	27.78	0.939214	24.215	0.999435	AIASEKSPTADAK	GO:0015629;GO:0005604	GO:0005198		0	0	0.9485	89.494	20	1.4121	100.76	20	1.4629	30.213	20	0.74509	23.864	18	1.0824	31.382	18	1.3845	31.164	18	0.86202	24.172	22	1.0787	23.147
O00515	Ladinin-1;Linear IgA disease antigen	LAD;LAD1	S356	0.998363	26.17	0.990785	12.745	1.14505	69.48	1.07022	45.05	0.89883	24.49	0.94112	30.82	0.609756	28.615	0.741894	55.32	0.901586	EEADMSSPTQRTY	GO:0015629;GO:0005604	GO:0005198		0	0	0.90577	17.335	16	1.3027	21.981	16	1.3475	13.601	16	0.86212	21.523	4	1.0601	11.38	4	1.1801	33.154	4	1.2206	25.398	6	0.84215	23.841
O00515	Ladinin-1;Linear IgA disease antigen	LAD;LAD1	S392	0.873266		1.0763		1.03407		1.02625										0.5	ETTITRSASMKIP	GO:0015629;GO:0005604	GO:0005198		0	n/a	1.0763		1	0.90345		1	0.96076		1	1.2325		1	1.014		1	0.9535		1
O00515	Ladinin-1;Linear IgA disease antigen	LAD;LAD1	S394	0.713565	33.25	0.88375	34.65	0.838988	27.37	0.976455	27.44	0.669301		0.80798	20.77	1.18482	35.33	1.08722		0.5	TITRSASMKIPDN	GO:0015629;GO:0005604	GO:0005198		0	0	0.88375	34.646	19	0.9101	31.711	19	0.94935	27.372	19	1.2385	33.249	10	1.2034	29.313	10	1.1049	27.435	10	0.80798	20.768	8	1.0211	14.394
O00515	Ladinin-1;Linear IgA disease antigen	LAD;LAD1	S49	0.942849	27.46	0.7508	18.38	0.865447	13.93	0.671433	17.44	0.983893	18.86	0.846	72.64	0.865373	15.16	0.758913	17.84	0.99964	DEAPRISQNGDRQ	GO:0015629;GO:0005604	GO:0005198		0	0	0.7508	18.375	9	1.1279	22.889	9	1.1527	13.932	9	0.79631	27.46	7	0.89852	15.611	7	0.89429	17.436	7	0.846	72.635	10	0.94759	23.311
O00515	Ladinin-1;Linear IgA disease antigen	LAD;LAD1	S64	1.08036	20.98	0.64891	73.5	0.818146	17	0.797186	31.82	0.629682	31.37	0.68925		0.428224		0.288065	36.02	0.999796	ASERIPSVEEAEV	GO:0015629;GO:0005604	GO:0005198		0	2	0.64891	73.502	5	0.82095	6.2636	5	1.2608	16.997	5	0.60064	20.976	5	0.85738	22.955	5	1.2285	31.815	5	0.68925		1	0.80638
O00515	Ladinin-1;Linear IgA disease antigen	LAD;LAD1	T19	0.969318	29.53	0.91144	57.45	0.928666	47.66	1.01689	28.78	0.612089	27.61	1.0329	39.49	0.959915	41.96	0.968757	22.45	1	SIARQRTIEDEEE	GO:0015629;GO:0005604	GO:0005198		0	0	0.91144	57.45	32	0.95398	23.841	32	1.0189	47.662	32	0.94029	29.526	40	1.0689	28.98	40	1.1157	28.775	40	1.0329	39.492	19	0.91099	29.824
O00566	M phase phosphoprotein 10;U3 small nucleolar ribonucleoprotein protein MPP10;Putative uncharacterized protein MPHOSPH10	MPHOSPH10;MPP10;MPHOSPH10	S163	1.1688	24.51	1.1702	13.7	1.30992	37.55	1.21525	26.36	1.19777	20.07	1.2561	8.21	1.31401	11.01	1.28574	11.29	1	KSDIRKSPVFSDE	GO:0005694;GO:0005730;GO:0005732	GO:0005515	GO:0010923;GO:0000375;GO:0006364	0	0	1.1702	13.7	40	1.2151	24.456	40	1.1194	37.554	40	1.0012	24.514	26	0.97408	29.798	26	1.0385	26.357	26	1.2561	8.21	5	1.145	4.1805
O00566	M phase phosphoprotein 10;U3 small nucleolar ribonucleoprotein protein MPP10;Putative uncharacterized protein MPHOSPH10	MPHOSPH10;MPP10;MPHOSPH10	S167	0.99406	17.4	1.2216	16.92	1.40472	16.02	1.13149	24.92	1.18346	13.58	1.3353	20.09	1.4512	10.65	1.30582	17.13	1	RKSPVFSDEDSDI	GO:0005694;GO:0005730;GO:0005732	GO:0005515	GO:0010923;GO:0000375;GO:0006364	0	0	1.2216	16.919	18	1.3508	26.421	18	1.1499	16.018	18	1.2289	17.4	2	1.2877	25.671	2	0.92624	24.921	2	1.3353	20.091	11	1.3836	22.328
O00566	M phase phosphoprotein 10;U3 small nucleolar ribonucleoprotein protein MPP10;Putative uncharacterized protein MPHOSPH10	MPHOSPH10;MPP10;MPHOSPH10	S171	1.1716	17.19	1.2071	13.62	1.46651	31.45	1.23462	14.85	1.10601	8.39	1.3073	16.67	1.42077	11.92	1.4494	15.41	1	VFSDEDSDIDFDI	GO:0005694;GO:0005730;GO:0005732	GO:0005515	GO:0010923;GO:0000375;GO:0006364	0	0	1.2071	13.621	48	1.3153	19.372	48	1.2149	31.446	48	1.0303	17.187	22	1.0285	26.574	22	1.0228	14.852	22	1.3073	16.674	21	1.2392	18.773
O00566	M phase phosphoprotein 10;U3 small nucleolar ribonucleoprotein protein MPP10;Putative uncharacterized protein MPHOSPH10	MPHOSPH10;MPP10;MPHOSPH10	S242	0.953217	31.87	1.0799	9.51	0.80945	77.71	0.770196	35.42	1.06798	18.15	1.1312	10.06	0.778876	18.13	0.857823	37.82	0.999997	FFEDIDSDEDEGG	GO:0005694;GO:0005730;GO:0005732	GO:0005515	GO:0010923;GO:0000375;GO:0006364	0	0	1.0799	9.5129	23	0.79787	7.7643	23	0.74956	77.707	23	1.1329	31.869	21	0.76473	8.9251	21	0.71321	35.418	21	1.1312	10.058	31	0.82517	15.505
O00567	Nucleolar protein 56;Nucleolar protein 5A	NOL5A;NOP56	S465																	0.390212	IASSENSSSTPEE	GO:0031428;GO:0005737;GO:0070761	GO:0005515;GO:0030515	GO:0008219;GO:0006364	n/a	n/a
O00567	Nucleolar protein 56;Nucleolar protein 5A	NOL5A;NOP56	S467	1.03701	5.54	1.0055	12.12	0.974028	3.62	0.756679	12.13	0.904897		0.89307	54.79	0.602447	30.52	0.548622		0.481948	SSENSSSTPEECE	GO:0031428;GO:0005737;GO:0070761	GO:0005515;GO:0030515	GO:0008219;GO:0006364	0	0	1.0055	12.124	4	0.83311	7.2519	4	0.9687	3.619	4	0.96961	5.5433	3	0.74841	12.976	3	0.75254	12.125	3	0.89307	54.793	4	0.6724	43.24
O00567	Nucleolar protein 56;Nucleolar protein 5A	NOL5A;NOP56	S519	0.85311	9.84	1.2057		1.56681		0.99961	34.5	1.18849	7.815	1.03683	18.42	0.90296	10.91	0.926071	13.675	0.66919	SKEEIMSSDIEET	GO:0031428;GO:0005737;GO:0070761	GO:0005515;GO:0030515	GO:0008219;GO:0006364	0	0	1.2057		1	1.2256		1	1.2995		1	1.3725		1	1.134		1	0.93017		1	1.16	18.423	6	0.92939	16.803
O00567	Nucleolar protein 56;Nucleolar protein 5A	NOL5A;NOP56	S537																	0.49978	IPKRKKSTPKEET	GO:0031428;GO:0005737;GO:0070761	GO:0005515;GO:0030515	GO:0008219;GO:0006364	n/a	n/a
O00567	Nucleolar protein 56;Nucleolar protein 5A	NOL5A;NOP56	S563	0.991489	10.69	1.3746	14.18	1.74588	12.2	1.66821	14.57	1.2628	6.05	0.9505	8.71	0.751076	13.08	0.610173	4.32	1	KKKRKFSKEEPVS	GO:0031428;GO:0005737;GO:0070761	GO:0005515;GO:0030515	GO:0008219;GO:0006364	0	0	1.3746	14.18	6	1.3646	16.026	6	1.2701	12.196	6	1.3864	10.689	12	1.5568	14.997	12	1.2136	14.572	12	0.9505	8.7134	2	0.76457	13.01
O00567	Nucleolar protein 56;Nucleolar protein 5A	NOL5A;NOP56	S569	1.04914	12.625	0.91198	73.74	1.22634	34.715	1.00792	21.4	1.03582	10.1	0.980915	19.985	1.06949	11.41	1.12791	8.44	1	SKEEPVSSGPEEA	GO:0031428;GO:0005737;GO:0070761	GO:0005515;GO:0030515	GO:0008219;GO:0006364	0	0	0.97209	143.89	12	0.99806	17.101	12	1.0448	24.137	12	0.816	17.408	2	1.1896	35.809	2	1.0429	29.794	2	1.0192	26.224	7	1.0147	11.711
O00567	Nucleolar protein 56;Nucleolar protein 5A	NOL5A;NOP56	S570	0.895334	5.375	0.98874	15.045	1.11431	29.785	1.02428	38.965	1.01129	14.11	0.98074	14.34	0.996515	27.92	0.922504	26.87	1	KEEPVSSGPEEAV	GO:0031428;GO:0005737;GO:0070761	GO:0005515;GO:0030515	GO:0008219;GO:0006364	0	0	1.0221	16.989	18	1.0164	17.34	18	0.9882	19.41	18	1.2217	0.63604	2	0.40978	100.41	2	1.1298	68.868	2	0.94158	19.007	10	0.86106	33.808
O00567	Nucleolar protein 56;Nucleolar protein 5A	NOL5A;NOP56	T538																	0.49978	PKRKKSTPKEETV	GO:0031428;GO:0005737;GO:0070761	GO:0005515;GO:0030515	GO:0008219;GO:0006364	n/a	n/a
O00571	ATP-dependent RNA helicase DDX3X;DEAD box protein 3, X-chromosomal;DEAD box, X isoform;Helicase-like protein 2;cDNA FLJ60399, highly similar to ATP-dependent RNA helicase DDX3X (EC 3.6.1.-);cDNA FLJ60675, highly similar to ATP-dependent RNA helicase DDX3X (EC 3.6.1.-);cDNA FLJ52848, highly similar to ATP-dependent RNA helicase DDX3X (EC 3.6.1.-);cDNA FLJ55031, highly similar to ATP-dependent RNA …	DBX;DDX3;DDX3X	S86			0.64142	28.1	0.74982	16.48			0.72968		1.3834	24.22	1.1345	32.21	0.889153		0.972089	GKSSFFSDRGSGS	GO:0005737;GO:0016607	GO:0005524;GO:0004004;GO:0003677;GO:0003723	GO:0044419	n/a	0	0.64142	28.102	2	0.68009	20.343	2	1.169	16.48	2										1.3834	24.222	8	1.1075	11.631
O00629	Importin alpha Q1;Importin subunit alpha-4;Karyopherin subunit alpha-4	KPNA4;QIP1	S60	0.952713	8.8	0.93465	12.61	0.651965	28.55	0.690697	18.33	0.935523	18.9	0.89015	19.71	0.677475	30.8	0.689822	18.71	1	EDICEDSDIDGDY	GO:0005829;GO:0005654	GO:0005488	GO:0019221;GO:0006607	0	0	0.93465	12.606	19	0.657	17.534	19	0.69755	28.548	19	0.98104	8.7974	11	0.68141	14.602	11	0.73899	18.328	11	0.89015	19.71	13	0.62838	29.588
O00767	Acyl-CoA desaturase;Delta(9)-desaturase;Fatty acid desaturase;Stearoyl-CoA desaturase	SCD	S198	1.37914	39.99	0.815445	29.21	0.775615	128.19	0.705376	34.33	2.01038	28.44	1.3088	28.31	1.63783	23.02	1.51552	16.01	0.850221	AVKEKGSTIDISD	GO:0005789;GO:0016021	GO:0005506;GO:0004768	GO:0006633	0	8	1.0794	29.211	8	1.1788	29.017	9	0.87771	128.19	11	0.59127	39.987	2	0.46412	78.462	2	0.86502	34.333	2	1.3088	28.311	12	1.4555	20.954
O14497	AT-rich interactive domain-containing protein 1A;B120;BRG1-associated factor 250;BRG1-associated factor 250a;hELD;Osa homolog 1;SWI/SNF complex protein p270;SWI/SNF-related, matrix-associated, actin-dependent regulator of chromatin subfamily F member 1;SWI-like protein	ARID1A;BAF250;BAF250A;C1orf4;OSA1;SMARCF1	S1600	1.03599	13.08	1.091	11.12	1.03452	68.15	1.20043	21.63			0.74637	46.43	0.891315	7.83			0.545265	PMENRTSPSKSPF	GO:0071565;GO:0071564;GO:0000790;GO:0016514	GO:0003677;GO:0016922;GO:0003713	GO:0030521;GO:0048096;GO:0042921;GO:0030520;GO:0007399;GO:0006337;GO:0042766;GO:0006357;GO:0006351	0	n/a	1.091	11.116	2	0.68243	56.03	2	0.94823	68.146	2	1.0531	13.084	5	1.0451	13.812	5	1.1003	21.634	5	0.74637	46.431	2	0.91014	34.557
O14497	AT-rich interactive domain-containing protein 1A;B120;BRG1-associated factor 250;BRG1-associated factor 250a;hELD;Osa homolog 1;SWI/SNF complex protein p270;SWI/SNF-related, matrix-associated, actin-dependent regulator of chromatin subfamily F member 1;SWI-like protein	ARID1A;BAF250;BAF250A;C1orf4;OSA1;SMARCF1	S1604	1.08886	10.92	1.1494	8.8	1.66629	10.28	1.26468	24.81	1.47698	33.52	1.2348	15.59	1.696	10.24	0.794483	80.5	0.989235	RTSPSKSPFIHSG	GO:0071565;GO:0071564;GO:0000790;GO:0016514	GO:0003677;GO:0016922;GO:0003713	GO:0030521;GO:0048096;GO:0042921;GO:0030520;GO:0007399;GO:0006337;GO:0042766;GO:0006357;GO:0006351	0	0	1.1494	8.7955	2	1.3575	4.477	2	1.4497	10.275	2	1.0556	10.924	9	1.091	12.643	9	1.1003	24.806	9	1.2348	15.594	5	1.4411	26.105
O14497	AT-rich interactive domain-containing protein 1A;B120;BRG1-associated factor 250;BRG1-associated factor 250a;hELD;Osa homolog 1;SWI/SNF complex protein p270;SWI/SNF-related, matrix-associated, actin-dependent regulator of chromatin subfamily F member 1;SWI-like protein;cDNA FLJ14749 fis, clone NT2RP3002876, weakly similar to Drosophila melanogaster eyelid (eld) mRNA	ARID1A;BAF250;BAF250A;C1orf4;OSA1;SMARCF1	S1751	0.756923	23.06	0.84185	36.69	0.906757	37.85	0.841825	19.31	1.33961	23.99	1.1219	16.88	1.43065	15.35	1.41101	24.75	1	IDPGRFSKVSSPA	GO:0071565;GO:0071564;GO:0000790;GO:0016514	GO:0003677;GO:0016922;GO:0003713	GO:0030521;GO:0048096;GO:0042921;GO:0030520;GO:0007399;GO:0006337;GO:0042766;GO:0006357;GO:0006351	0	0	0.84185	36.687	7	0.90981	31.324	7	1.0771	37.846	7	1.1122	23.058	5	1.2244	8.675	5	0.99997	19.309	5	1.1219	16.88	7	1.2883	21.409
O14497	AT-rich interactive domain-containing protein 1A;B120;BRG1-associated factor 250;BRG1-associated factor 250a;hELD;Osa homolog 1;SWI/SNF complex protein p270;SWI/SNF-related, matrix-associated, actin-dependent regulator of chromatin subfamily F member 1;SWI-like protein	ARID1A;BAF250;BAF250A;C1orf4;OSA1;SMARCF1	S363	1.03774	10.12	1.0476	10.24	1.16231	31.94	1.11821	13.4	1.0402	6.81	1.0817	18.47	1.25066	19.04	1.40556	7.93	0.999892	SHHAPMSPGSSGG	GO:0071565;GO:0071564;GO:0000790;GO:0016514	GO:0003677;GO:0016922;GO:0003713	GO:0030521;GO:0048096;GO:0042921;GO:0030520;GO:0007399;GO:0006337;GO:0042766;GO:0006357;GO:0006351	0	0	1.0476	10.237	27	1.0185	28.573	27	1.1095	31.936	27	1.0095	10.124	35	0.96382	13.129	35	1.0674	13.402	35	1.0817	18.468	23	1.1398	14.306
O14497	AT-rich interactive domain-containing protein 1A;B120;BRG1-associated factor 250;BRG1-associated factor 250a;hELD;Osa homolog 1;SWI/SNF complex protein p270;SWI/SNF-related, matrix-associated, actin-dependent regulator of chromatin subfamily F member 1;SWI-like protein	ARID1A;BAF250;BAF250A;C1orf4;OSA1;SMARCF1	S696	0.881225		1.0068	2.01	1.02442	4.14	1.20443				1.0606	8.27	1.1604	5.38			0.987735	PGIRGPSPSPVGS	GO:0071565;GO:0071564;GO:0000790;GO:0016514	GO:0003677;GO:0016922;GO:0003713	GO:0030521;GO:0048096;GO:0042921;GO:0030520;GO:0007399;GO:0006337;GO:0042766;GO:0006357;GO:0006351	0	n/a	1.0068	2.012	2	1.1364	6.1685	2	1.0175	4.1418	2	1.1425		1	1.2368		1	1.1963		1	1.0606	8.2712	3	1.2146	1.9865
O14497	AT-rich interactive domain-containing protein 1A;B120;BRG1-associated factor 250;BRG1-associated factor 250a;hELD;Osa homolog 1;SWI/SNF complex protein p270;SWI/SNF-related, matrix-associated, actin-dependent regulator of chromatin subfamily F member 1;SWI-like protein	ARID1A;BAF250;BAF250A;C1orf4;OSA1;SMARCF1	S772																	0.83661	QPGSAISPRQPSG	GO:0071565;GO:0071564;GO:0000790;GO:0016514	GO:0003677;GO:0016922;GO:0003713	GO:0030521;GO:0048096;GO:0042921;GO:0030520;GO:0007399;GO:0006337;GO:0042766;GO:0006357;GO:0006351	n/a	n/a
O14497	AT-rich interactive domain-containing protein 1A;B120;BRG1-associated factor 250;BRG1-associated factor 250a;hELD;Osa homolog 1;SWI/SNF complex protein p270;SWI/SNF-related, matrix-associated, actin-dependent regulator of chromatin subfamily F member 1;SWI-like protein;cDNA FLJ14749 fis, clone NT2RP3002876, weakly similar to Drosophila melanogaster eyelid (eld) mRNA	ARID1A;BAF250;BAF250A;C1orf4;OSA1;SMARCF1	T1891																	0.432772	AEGTPGTTDQEGP	GO:0071565;GO:0071564;GO:0000790;GO:0016514	GO:0003677;GO:0016922;GO:0003713	GO:0030521;GO:0048096;GO:0042921;GO:0030520;GO:0007399;GO:0006337;GO:0042766;GO:0006357;GO:0006351	n/a	n/a
O14523	C2 domain-containing protein 2-like;Transmembrane protein 24	C2CD2L;DLNB23;KIAA0285;TMEM24	S468	1.03973	1.38	0.9184	10.72	1.07223	52.35	0.985627	22.55	1.10498	11.39	0.92682		0.985395		1.0068	15.02	0.909642	IDSPSRSPSKVEV	GO:0016021			0	0	0.9184	10.72	4	1.1221	21.468	4	1.1675	52.35	4	0.88331	1.3828	2	1.0774	15.821	2	1.0732	22.545	2	0.92682		1	1.037
O14523	C2 domain-containing protein 2-like;Transmembrane protein 24	C2CD2L;DLNB23;KIAA0285;TMEM24	S661	0.949573	14.7	1.0677	44.34	0.997627	50.85	1.216	9.03	1.10055	14.3	1.0226	6.34	1.14286	4.24	0.967942	44.75	0.844431	QKEAGISQSHDDI	GO:0016021			0	0	1.0677	44.335	2	0.63016	4.1966	2	0.93437	50.847	2	1.1244	14.7	6	1.056	15.447	6	1.1389	9.026	6	1.0226	6.342	3	1.0409	2.269
O14545	Protein FLN29;TRAF-type zinc finger domain-containing protein 1	FLN29;TRAFD1	S327	1.2572	17.565	1.25888	8.705	1.19187	11.925	1.22082	15.845	0.691995	9.5	1.10089	9.32	1.17267	12.71	0.823304	13.19	0.998885	INTGSSSPRGVEE	GO:0005622	GO:0008270	GO:0045824	0	0	0.99925	12.465	2	0.94987	2.9989	2	0.97793	4.293	2	0.98067	25.941	3	0.97223	15.902	3	0.93144	15.131	3	0.97789	9.1537	4	1.0889	17.839
O14545	Protein FLN29;TRAF-type zinc finger domain-containing protein 1	FLN29;TRAFD1	T414	1.19167		1.0237		0.879461		1.13733		0.801424		1.0782		0.897138		0.795539		0.567688	DSQPQETSPEIPR	GO:0005622	GO:0008270	GO:0045824	0	0	1.0237		1	0.73159		1	0.8591		1
O14579	Coatomer subunit epsilon;Epsilon-coat protein;Coatomer protein complex, subunit epsilon, isoform CRA_e;Putative uncharacterized protein COPE	COPE;COPE;hCG_2001439	S99	0.91008	12.56	1.0293	28.61	0.809915	67.3	1.22847	19.05	0.863133	18.63	0.84174	11.34	1.19855	13.49	1.57801	118.87	1	HESRRDSIVAEID	GO:0030126;GO:0005829	GO:0005488;GO:0005198	GO:0048205;GO:0006891;GO:0015031;GO:0006890	0	0	1.0293	28.611	24	0.87348	57.749	24	0.78686	67.304	24	1.131	12.561	14	1.2372	14.481	14	1.1935	19.049	14	0.84174	11.34	15	1.0373	15.694
O14617	Adapter-related protein complex 3 subunit delta-1;AP-3 complex subunit delta;AP-3 complex subunit delta-1;Delta-adaptin	AP3D1;PRO0039	S632	1.19932		0.85064	5.07	0.791206	12.85	0.869864				0.70097	32.67	0.736439	25.44			1	WINEPISDSESED	GO:0010008;GO:0000139;GO:0030117	GO:0005488;GO:0008565	GO:0006726;GO:0006886;GO:0061088;GO:0016192	0	n/a	0.85064	5.0672	3	0.66558	5.4365	3	0.93013	12.847	3	0.70927		1	0.60029		1	1.0226		1	0.70097	32.668	10	0.77249	17.164
O14617	Adapter-related protein complex 3 subunit delta-1;AP-3 complex subunit delta;AP-3 complex subunit delta-1;Delta-adaptin	AP3D1;PRO0039	S634	0.947995	0.55	0.77692	11.85	0.757878	17.32	0.709988	4.86			0.70097	32.67	0.736439	25.44			1	NEPISDSESEDER	GO:0010008;GO:0000139;GO:0030117	GO:0005488;GO:0008565	GO:0006726;GO:0006886;GO:0061088;GO:0016192	0	n/a	0.77692	11.854	8	0.68657	25.095	8	0.97549	17.323	8	0.81954	0.5476	2	0.71418	19.783	2	0.91385	4.8564	2	0.70097	32.668	10	0.77249	17.164
O14617	Adapter-related protein complex 3 subunit delta-1;AP-3 complex subunit delta;AP-3 complex subunit delta-1;Delta-adaptin	AP3D1;PRO0039	S636	0.936989	0.55	0.7679	25.91	0.751697	20.78	0.701745	4.86			0.70097	32.67	0.736439	25.44			1	PISDSESEDERPR	GO:0010008;GO:0000139;GO:0030117	GO:0005488;GO:0008565	GO:0006726;GO:0006886;GO:0061088;GO:0016192	0	n/a	0.7679	25.906	11	0.70104	28.588	11	0.9789	20.784	11	0.81954	0.5476	2	0.71418	19.783	2	0.91385	4.8564	2	0.70097	32.668	10	0.77249	17.164
O14617	Adapter-related protein complex 3 subunit delta-1;AP-3 complex subunit delta;AP-3 complex subunit delta-1;Delta-adaptin	AP3D1;PRO0039	S658	1.06457	15.14	1.2646	14.04	1.09884	10.71	1.19175	29.27			0.69554	26.61	0.790133	21.64			1	RPKHRPSEADEEE	GO:0010008;GO:0000139;GO:0030117	GO:0005488;GO:0008565	GO:0006726;GO:0006886;GO:0061088;GO:0016192	0	n/a	1.2646	14.043	4	0.98263	15.205	4	0.86892	10.714	4	1.1879	15.143	7	1.1326	8.0141	7	0.94239	29.273	7	0.69554	26.613	5	0.71158	23.475
O14617	Adapter-related protein complex 3 subunit delta-1;AP-3 complex subunit delta;AP-3 complex subunit delta-1;Delta-adaptin	AP3D1;PRO0039	T826	0.941082	32.28	0.90374	12.07	0.970978	14.3	1.04753	20.49	0.664695		0.72239		1.12946		0.772307		0.730605	KHRNTETSKSPEK	GO:0010008;GO:0000139;GO:0030117	GO:0005488;GO:0008565	GO:0006726;GO:0006886;GO:0061088;GO:0016192	0	0	0.90374	12.067	4	0.84822	17.575	4	1.0744	14.304	4	0.96032	32.28	4	0.85709	21.354	4	1.1591	20.485	4	0.72239		1	0.95982
O14646	ATP-dependent helicase CHD1;Chromodomain-helicase-DNA-binding protein 1	CHD1	S1096			1.0783	17.28	0.818484	41.39											0.999279	SRSRRYSGSDSDS	GO:0005737;GO:0005634	GO:0005524;GO:0004003;GO:0003677;GO:0035064	GO:0006357;GO:0006351	n/a	n/a	1.0783	17.283	3	0.84819	26.152	3	0.75905	41.394	3
O14646	ATP-dependent helicase CHD1;Chromodomain-helicase-DNA-binding protein 1	CHD1	S1100			1.1652	10.96	1.20528	43.77											0.849766	RYSGSDSDSISEG	GO:0005737;GO:0005634	GO:0005524;GO:0004003;GO:0003677;GO:0035064	GO:0006357;GO:0006351	n/a	n/a	1.1652	10.957	2	0.97063	19.07	2	1.0344	43.771	2
O14646	ATP-dependent helicase CHD1;Chromodomain-helicase-DNA-binding protein 1	CHD1	S1677			1.0711	39.94	0.898899	41.93			1.2548	25.86	1.2446	24.68	1.29463	22.65	1.32761	27.15	0.991065	SSSGPRSPIDQRS	GO:0005737;GO:0005634	GO:0005524;GO:0004003;GO:0003677;GO:0035064	GO:0006357;GO:0006351	n/a	0	1.0711	39.942	13	1.2893	16.88	13	0.83923	41.932	13										1.2446	24.676	10	1.1434	18.355
O14646	ATP-dependent helicase CHD1;Chromodomain-helicase-DNA-binding protein 1	CHD1	S1689	1.01713	9.97	1.1279	15.39	1.47202	29.45	1.38991	25.91	0.972319	5.38	0.99478	20.9	1.21662	22.39	1.19294	4.39	0.999979	SPYGSRSPFEHSV	GO:0005737;GO:0005634	GO:0005524;GO:0004003;GO:0003677;GO:0035064	GO:0006357;GO:0006351	0	0	1.1279	15.385	12	1.3216	21.882	12	1.3051	29.449	12	1.1089	9.9744	27	1.2858	19.185	27	1.2323	25.908	27	0.99478	20.901	16	1.1316	14.868
O14646	ATP-dependent helicase CHD1;Chromodomain-helicase-DNA-binding protein 1	CHD1	S215	0.812775	13.17	0.9772		0.627548		0.862467	24.04	1.32691	13.94	1.2567	17.11	1.07027	17.54	1.15169	12.51	1	KKRQIDSSEEDDD	GO:0005737;GO:0005634	GO:0005524;GO:0004003;GO:0003677;GO:0035064	GO:0006357;GO:0006351	0	0	0.9772		1	1.1117		1	0.64219		1	1.2023	13.17	4	0.87156	26.418	4	0.88259	24.036	4	1.2567	17.108	16	1.0557	11.102
O14646	ATP-dependent helicase CHD1;Chromodomain-helicase-DNA-binding protein 1	CHD1	S216	0.812775	13.17	0.9772		0.627548		0.862467	24.04	1.32691	13.94	1.2567	17.11	1.07027	17.54	1.15169	12.51	1	KRQIDSSEEDDDE	GO:0005737;GO:0005634	GO:0005524;GO:0004003;GO:0003677;GO:0035064	GO:0006357;GO:0006351	0	0	0.9772		1	1.1117		1	0.64219		1	1.2023	13.17	4	0.87156	26.418	4	0.88259	24.036	4	1.2567	17.108	16	1.0557	11.102
O14647	ATP-dependent helicase CHD2;Chromodomain-helicase-DNA-binding protein 2	CHD2	S1085			1.2014	5.7	1.15465	9.33			0.998902	17.05	1.1828	59.91	1.11966	36.02	1.06464	50.58	0.999957	KAQTNDSDSDTES	GO:0005634	GO:0005524;GO:0004003;GO:0003677	GO:0006357	n/a	0	1.2014	5.7016	2	1.0058	14.433	2	0.96109	9.3296	2										1.1828	59.906	26	1.1458	37.027
O14647	ATP-dependent helicase CHD2;Chromodomain-helicase-DNA-binding protein 2	CHD2	S1087			1.1539		1.0382				0.991893	17.05	1.1745	64.27	1.12394	40.66	1.05717	50.58	0.999877	QTNDSDSDTESKR	GO:0005634	GO:0005524;GO:0004003;GO:0003677	GO:0006357	n/a	0	1.1539		1	0.90821		1	0.89973		1										1.1745	64.274	21	1.1614	40.569
O14647	ATP-dependent helicase CHD2;Chromodomain-helicase-DNA-binding protein 2	CHD2	S1364	1.2353		1.1868	41.31	1.12731	43.19	0.747209		0.320097		0.18815		0.178225		0.177362		0.5	EHGIEISSPRHSD	GO:0005634	GO:0005524;GO:0004003;GO:0003677	GO:0006357	0	7	1.1868	41.307	6	1.2011	38.257	6	0.94987	43.186	6	0.96074		1	0.79983		1	0.6296		1	0.18815		1	1.1491
O14647	ATP-dependent helicase CHD2;Chromodomain-helicase-DNA-binding protein 2	CHD2	S1365	0.884348	11.38	1.108	24.53	0.978142	14.79	1.01271	26.22	1.20297		1.4604	11.4	1.31883	18.7	1.4589		0.84364	HGIEISSPRHSDN	GO:0005634	GO:0005524;GO:0004003;GO:0003677	GO:0006357	0	0	1.108	24.533	7	1.0929	12.407	7	0.8828	14.786	7	1.2529	11.379	12	1.2343	16.244	12	0.914	26.218	12	1.4604	11.395	2	1.1665	7.1963
O14647	ATP-dependent helicase CHD2;Chromodomain-helicase-DNA-binding protein 2	CHD2	S1386	1.05685	12.52	1.2622	35.42	1.17031	17.21	1.00291	29.89			1.3424	28.3	1.22768	14.55			0.999999	DDGIEKSPMKKKQ	GO:0005634	GO:0005524;GO:0004003;GO:0003677	GO:0006357	0	n/a	1.2622	35.42	2	1.0382	9.9061	2	0.9272	17.213	2	1.1943	12.524	4	1.2191	7.9428	4	0.79457	29.891	4	1.3424	28.298	4	1.0154	13.384
O14647	ATP-dependent helicase CHD2;Chromodomain-helicase-DNA-binding protein 2	CHD2	S1587	0.420206	13.56	0.79419	70.56	0.821272	13.86	0.579409	45.3									0.95541	PEASGSSRDSIIS	GO:0005634	GO:0005524;GO:0004003;GO:0003677	GO:0006357	3	n/a	0.79419	70.559	3	0.61373	74.651	3	1.0341	13.863	3	1.89	13.558	3	1.4893	19.059	3	0.72956	45.298	3
O14647	ATP-dependent helicase CHD2;Chromodomain-helicase-DNA-binding protein 2	CHD2	S1795	1.10237	22.5	1.2761	7.34	1.39439	24.23	1.27993	25.33	0.843296		0.83827		1.38122		1.00115		0.999973	SPPSQKSPHDSKS	GO:0005634	GO:0005524;GO:0004003;GO:0003677	GO:0006357	0	0	1.2761	7.3439	5	1.3495	23.363	5	1.0927	24.226	5	1.1576	22.5	14	1.2035	27.486	14	1.003	25.329	14	0.83827		1	1.0385
O14681	Etoposide-induced protein 2.4 homolog;p53-induced gene 8 protein	EI24;PIG8	S320																	0.390982	AISSSTSAEKFPS	GO:0005789;GO:0016021;GO:0031965		GO:0006915;GO:0006914;GO:0006917;GO:0030308	n/a	n/a
O14681	Etoposide-induced protein 2.4 homolog;p53-induced gene 8 protein	EI24;PIG8	S330	0.950243		0.785005	14.04	0.902717	24.84	0.753526		0.956145	8.47	0.77224	15.84	0.731945	22.58	1.01122	20.55	1	FPSPHPSPAKIKA	GO:0005789;GO:0016021;GO:0031965		GO:0006915;GO:0006914;GO:0006917;GO:0030308	0	0	0.97311	14.041	25	1.2725	22.346	25	1.2373	24.838	25	0.68494		1	0.59548		1	1.0764		1	1.2084	15.837	25	1.0431	12.617
O14681	Etoposide-induced protein 2.4 homolog;p53-induced gene 8 protein;Putative uncharacterized protein EI24	EI24;PIG8;EI24	S46	0.951104	8.72	1.5036	9.15	1.30001	140.03	1.18676	67.97									0.996576	QRRRRASSVIAQR	GO:0005789;GO:0016021;GO:0031965		GO:0006915;GO:0006914;GO:0006917;GO:0030308	0	n/a	1.5036	9.1451	3	1.6533	150.58	3	0.8646	140.03	3	1.5809	8.715	8	1.2831	45.511	8	0.78928	67.967	8
O14681	Etoposide-induced protein 2.4 homolog;p53-induced gene 8 protein	EI24;PIG8	T319																	0.390982	SAISSSTSAEKFP	GO:0005789;GO:0016021;GO:0031965		GO:0006915;GO:0006914;GO:0006917;GO:0030308	n/a	n/a
O14686	ALL1-related protein;Histone-lysine N-methyltransferase MLL2;Lysine N-methyltransferase 2B;Myeloid/lymphoid or mixed-lineage leukemia protein 2	ALR;KMT2B;MLL2	S1671	0.889185	19.29	0.80955	18.98	0.740949	16.84	0.74919	30.63	1.0016	33.13	0.87077	22.83	0.918227	10.78	0.815946	20.91	1	KIEGPVSPDVEPG	GO:0035097	GO:0018024;GO:0005515;GO:0044212;GO:0008270	GO:0006342;GO:0051568;GO:0001555;GO:0008284;GO:0033148;GO:0045944;GO:0043627;GO:0006351	0	0	0.80955	18.981	18	0.84691	23.852	18	0.91526	16.838	18	0.91044	19.294	8	0.82299	15.437	8	0.92544	30.633	8	0.87077	22.832	8	0.9032	12.181
O14686	ALL1-related protein;Histone-lysine N-methyltransferase MLL2;Lysine N-methyltransferase 2B;Myeloid/lymphoid or mixed-lineage leukemia protein 2	ALR;KMT2B;MLL2	S1837	1.41616	4.93	2.135	51.62	1.8912	33.89	1.92022	13.67									1	DIADEESRGIEGK	GO:0035097	GO:0018024;GO:0005515;GO:0044212;GO:0008270	GO:0006342;GO:0051568;GO:0001555;GO:0008284;GO:0033148;GO:0045944;GO:0043627;GO:0006351	4	n/a	2.135	51.618	5	1.5931	19.283	5	0.88581	33.885	5	1.5076	4.9293	3	1.6696	31.47	3	0.8994	13.671	3
O14686	ALL1-related protein;Histone-lysine N-methyltransferase MLL2;Lysine N-methyltransferase 2B;Myeloid/lymphoid or mixed-lineage leukemia protein 2	ALR;KMT2B;MLL2	S2299																	0.491746	EEIGASSPSYGPP	GO:0035097	GO:0018024;GO:0005515;GO:0044212;GO:0008270	GO:0006342;GO:0051568;GO:0001555;GO:0008284;GO:0033148;GO:0045944;GO:0043627;GO:0006351	n/a	n/a
O14686	ALL1-related protein;Histone-lysine N-methyltransferase MLL2;Lysine N-methyltransferase 2B;Myeloid/lymphoid or mixed-lineage leukemia protein 2	ALR;KMT2B;MLL2	S2312									0.706721		0.85068	34.86	0.778304	46.2	0.531803		0.811538	NIGFVDSPSSGTH	GO:0035097	GO:0018024;GO:0005515;GO:0044212;GO:0008270	GO:0006342;GO:0051568;GO:0001555;GO:0008284;GO:0033148;GO:0045944;GO:0043627;GO:0006351	n/a	0										1.0329	17.506	4	0.90401	7.7086	4	0.91814	13.037	4	0.85068	34.861	9	0.8875	39.254
O14686	ALL1-related protein;Histone-lysine N-methyltransferase MLL2;Lysine N-methyltransferase 2B;Myeloid/lymphoid or mixed-lineage leukemia protein 2	ALR;KMT2B;MLL2	S3133			1.0382	24.64	1.10828	24.41			0.922989	39.02	0.95797	44.96	0.778312	47.86	0.873927	21.31	0.998023	EGGRHPSPCQFTI	GO:0035097	GO:0018024;GO:0005515;GO:0044212;GO:0008270	GO:0006342;GO:0051568;GO:0001555;GO:0008284;GO:0033148;GO:0045944;GO:0043627;GO:0006351	n/a	0	1.0382	24.642	4	1.1143	20.742	4	1.0675	24.413	4										0.95797	44.958	5	0.85253	19.697
O14686	ALL1-related protein;Histone-lysine N-methyltransferase MLL2;Lysine N-methyltransferase 2B;Myeloid/lymphoid or mixed-lineage leukemia protein 2	ALR;KMT2B;MLL2	S4362																	1	PPPGRVSPAAAQI	GO:0035097	GO:0018024;GO:0005515;GO:0044212;GO:0008270	GO:0006342;GO:0051568;GO:0001555;GO:0008284;GO:0033148;GO:0045944;GO:0043627;GO:0006351	n/a	n/a
O14686	ALL1-related protein;Histone-lysine N-methyltransferase MLL2;Lysine N-methyltransferase 2B;Myeloid/lymphoid or mixed-lineage leukemia protein 2	ALR;KMT2B;MLL2	S4741	0.855337	19.05	0.89588	15.81	0.888507	15.89	0.937897	37.16	1.13317	27.88	0.96673	6.79	0.921506	12.25	1.15336	30.935	1	QEDRAISPVIPII	GO:0035097	GO:0018024;GO:0005515;GO:0044212;GO:0008270	GO:0006342;GO:0051568;GO:0001555;GO:0008284;GO:0033148;GO:0045944;GO:0043627;GO:0006351	0	0																			1.0204		1	1.4679
O14686	ALL1-related protein;Histone-lysine N-methyltransferase MLL2;Lysine N-methyltransferase 2B;Myeloid/lymphoid or mixed-lineage leukemia protein 2	ALR;KMT2B;MLL2	S48	1.42218		0.92884		1.10355		0.7136		0.784542	113.17	0.74271	17.07	0.547162	64.62	0.558704	88.05	0.591219	SVISSGSPRIQET	GO:0035097	GO:0018024;GO:0005515;GO:0044212;GO:0008270	GO:0006342;GO:0051568;GO:0001555;GO:0008284;GO:0033148;GO:0045944;GO:0043627;GO:0006351	0	0	0.92884		1	0.72632		1	1.1881		1	0.65311		1	0.4078		1	0.76827		1	0.74271	17.07	5	0.60737	64.575
O14686	ALL1-related protein;Histone-lysine N-methyltransferase MLL2;Lysine N-methyltransferase 2B;Myeloid/lymphoid or mixed-lineage leukemia protein 2	ALR;KMT2B;MLL2	T2232	0.820251	24.62	0.64831	27.69	0.456313	33.43	0.706204	16.14	0.868957		0.67796	21.73	0.469128	11.38	0.629276		0.993023	PGEFHTTPPGTPR	GO:0035097	GO:0018024;GO:0005515;GO:0044212;GO:0008270	GO:0006342;GO:0051568;GO:0001555;GO:0008284;GO:0033148;GO:0045944;GO:0043627;GO:0006351	1	1	0.64831	27.693	9	0.67197	35.997	9	0.70385	33.428	9	0.79038	24.616	5	0.77819	25.09	5	1.0893	16.144	5	0.67796	21.726	4	0.76387	23.887
O14686	ALL1-related protein;Histone-lysine N-methyltransferase MLL2;Lysine N-methyltransferase 2B;Myeloid/lymphoid or mixed-lineage leukemia protein 2	ALR;KMT2B;MLL2	T2243	1.35171	22.33	0.96343	0.14	0.9853	22.72	1.01218	7.47	1.05384	16.85	0.96614	15.78	1.18719	18.98	1.10923	13.2	0.911511	PRHQPSTPDPFIK	GO:0035097	GO:0018024;GO:0005515;GO:0044212;GO:0008270	GO:0006342;GO:0051568;GO:0001555;GO:0008284;GO:0033148;GO:0045944;GO:0043627;GO:0006351	0	0	0.96343	0.13673	2	0.90996	15.29	2	1.0227	22.72	2	0.71275	22.334	4	0.85232	12.553	4	1.0506	7.471	4	0.96614	15.784	6	1.0129	7.2414
O14715	Ran-binding protein 2-like 3;RANBP2-like and GRIP domain-containing protein 8;Ran-binding protein 2-like 1/2;RANBP2-like and GRIP domain-containing protein 5/6;Sperm membrane protein BS-63;Putative uncharacterized protein RGPD6;Putative uncharacterized protein RGPD5	RANBP2ALPHA;RANBP2L1;RANBP2L3;RGPD8;RANBP2L1;RANBP2L2;RGP5;RGP6;RGP7;RGPD5;RGPD6;RGPD7;RGPD6;RGPD5	S21									1.1909		1.1023	8.68	1.36575	7.86	1.7801		0.999365	VIGITPSPRQKSM	GO:0005643	GO:0008536	GO:0000042	n/a	0
O14730	RIO kinase 3;Serine/threonine-protein kinase RIO3;sudD homolog	RIOK3;SUDD	S127	0.926936	6.8	1.0403	1.6	0.924827	6.23	1.00392	15			0.82907	11.03	0.91778	15.18			0.908606	PYEDSDSSEDEVD		GO:0005524;GO:0005515;GO:0004674	GO:0007059	0	n/a	1.0403	1.6049	2	0.81222	5.1696	2	0.889	6.2303	2	1.1223	6.8017	4	1.0085	10.332	4	0.96503	15.004	4	0.82907	11.033	4	1.0626	7.5095
O14730	RIO kinase 3;Serine/threonine-protein kinase RIO3;sudD homolog	RIOK3;SUDD	S128	0.926936	6.8	1.0403	1.6	0.924827	6.23	1.00392	15			0.82907	11.03	0.91778	15.18			0.847496	YEDSDSSEDEVDW		GO:0005524;GO:0005515;GO:0004674	GO:0007059	0	n/a	1.0403	1.6049	2	0.81222	5.1696	2	0.889	6.2303	2	1.1223	6.8017	4	1.0085	10.332	4	0.96503	15.004	4	0.82907	11.033	4	1.0626	7.5095
O14730	RIO kinase 3;Serine/threonine-protein kinase RIO3;sudD homolog	RIOK3;SUDD	Y122																	0.751093	YRKVHPYEDSDSS		GO:0005524;GO:0005515;GO:0004674	GO:0007059	n/a	n/a										1.1323		1	1.2391		1	0.97708		1
O14737	Programmed cell death protein 5;TF-1 cell apoptosis-related protein 19	PDCD5;TFAR19	S119			0.56815	10.99	0.44989	27.18			0.744375	11.74	0.85484	19.58	0.944513	25.03	0.848506	11.22	1	RRKVMDSDEDDDY	GO:0005737;GO:0005634	GO:0003677	GO:0006915;GO:0006917	n/a	0	0.56815	10.986	3	0.42067	23.179	3	0.79185	27.181	3										0.85484	19.581	7	1.12	20.89
O14745	Ezrin-radixin-moesin-binding phosphoprotein 50;Na(+)/H(+) exchange regulatory cofactor NHE-RF1;Regulatory cofactor of Na(+)/H(+) exchanger;Sodium-hydrogen exchanger regulatory factor 1;Solute carrier family 9 isoform A3 regulatory factor 1	NHERF;NHERF1;SLC9A3R1	S269	1.56102	45.41	1.05174	14.205	0.686879	24.12	0.921686	23.685	0.570121		0.868465	16.15	0.882161	1.99	0.47221		0.999994	EIQKENSREAIAE	GO:0015629;GO:0016324;GO:0005813;GO:0012505;GO:0030175;GO:0043231;GO:0031528;GO:0001726	GO:0031698;GO:0008013;GO:0017081;GO:0070851;GO:0030165;GO:0019902;GO:0043621	GO:0006915;GO:0032782;GO:0034635;GO:0030033;GO:0008285;GO:0070373;GO:0014067;GO:0010642;GO:0051898;GO:0006461;GO:0045859;GO:0070293;GO:0016055	0	3	0.85619	16.764	13	0.57347	31.577	13	0.63913	20.421	13	0.5374	81.237	4	0.53293	72.644	4	0.80644	20.894	4	0.64863	30.053	2	0.67439	60.955
[truncated: 5,846 more rows]
[truncated: 49 more columns]

## Sheet: Supplemental Table S2
Term	Count	Genes
[truncated: 158 more rows]

## Sheet: Supplemental Table S3
UniProt Accession Key	Protein Names	Gene Names	Position	Ratio-AA 2 mins	Average variability (%) AA 2 mins	Ratio-AA 7 mins	Average variability (%) AA 7 mins	Ratio-AA 15 mins	Average variability (%) AA 15 mins	Ratio-AA 30 mins	Average variability (%) AA 30 mins	Ratio-Rapa 2 mins	Average variability (%) Rapa 2 mins	Ratio-Rapa 7 mins	Average variability (%) Rapa 7 mins	Ratio-Rapa 15 mins	Average variability (%) Rapa 15 mins	Ratio-Rapa 30 mins	Average variability (%) Rapa 30 mins	Localization Prob	Sequence Window	GOCC	GOMF	GOBP	Cluster AA Starvation	Cluster Rapamycin	Ratio M L Normalized Rep1_AA_starvation_0_15	Ratio M L Variability(%) Rep1_AA_starvation_0_15	Ratio M L Count Rep1_AA_starvation_0_15	Ratio H L Normalized Rep1_AA_starvation_0_15	Ratio H L Variability(%) Rep1_AA_starvation_0_15	Ratio H L Count Rep1_AA_starvation_0_15	Ratio H M Normalized Rep1_AA_starvation_0_15	Ratio H M Variability(%) Rep1_AA_starvation_0_15	Ratio H M Count Rep1_AA_starvation_0_15	Ratio M L Normalized Rep1_AA_starvation_2_30	Ratio M L Variability(%) Rep1_AA_starvation_2_30	Ratio M L Count Rep1_AA_starvation_2_30	Ratio H L Normalized Rep1_AA_starvation_2_30	Ratio H L Variability(%) Rep1_AA_starvation_2_30	Ratio H L Count Rep1_AA_starvation_2_30	Ratio H M Normalized Rep1_AA_starvation_2_30	Ratio H M Variability(%) Rep1_AA_starvation_2_30	Ratio H M Count Rep1_AA_starvation_2_30	Ratio M L Normalized Rep1_Rapamycin_0_15	Ratio M L Variability(%) Rep1_Rapamycin_0_15	Ratio M L Count Rep1_Rapamycin_0_15	Ratio H L Normalized Rep1_Rapamycin_0_15	Ratio H L Variability(%) Rep1_Rapamycin_0_15
[truncated: 89 more rows]
[truncated: 49 more columns]

[truncated: 2 more sheets: Supplemental Table S4, Supplemental Table S5]
